# Supplementary material for: Enrichment of Cysteine S-palmitoylated Peptides Using Sodium Deoxycholate Acid Precipitation
Source: Mol Cell Proteomics. 2025 Oct 16;25(2):101218. doi: 10.1016/j.mcpro.2025.101218 (PMC12874130; doi:10.1016/j.mcpro.2025.101218)
Supplement: Supplementary file [file mmc2.xlsx]

## Sheet: Summary
Mouse Brain S-Palmitoylated Proteome
	Table S1 - Replicate 1 of mouse brain S-Palmitoylated proteome
	Table S2 - Replicate 2 of mouse brain S-Palmitoylated proteome
	Table S3 - merged mouse brain S-Palmitoylated proteome replicates
	Table S4 - S-Palmitoylated peptides from proteins in the nuclear pore complex
	Table S5 - merged mouse brain S-Palmitoylated proteome replicates - No disulfide sites

## Sheet: Table S1
Master Protein Accessions	Master Protein Descriptions	Annotated Sequence	Modifications	Qvality PEP	Qvality q-value	# Protein Groups	# Proteins	# Isoforms	# PSMs	Positions in Master Proteins	Modifications in Master Proteins	# Missed Cleavages	Theo. MH+ [Da]	Found in Sample: [S1] F1: Sample	Confidence (by Search Engine): Mascot	Confidence (by Search Engine): Sequest HT	Percolator q-Value (by Search Engine): Mascot	Percolator q-Value (by Search Engine): Sequest HT	Percolator PEP (by Search Engine): Mascot	Percolator PEP (by Search Engine): Sequest HT	XCorr (by Search Engine): Sequest HT	Ions Score (by Search Engine): Mascot
Q6ZPJ3	(E3-independent) E2 ubiquitin-conjugating enzyme UBE2O OS=Mus musculus OX=10090 GN=Ube2o PE=1 SV=3	[R].SNDLFPVHHLDNNEFCPGDFVVDK.[R]	1xCarbamidomethyl [C16]	4.86811e-06	3.46687e-05	1	1	1	1	Q6ZPJ3 [565-588]	Q6ZPJ3 1xCarbamidomethyl [C580]	0	2815.28	High	n/a	High		7.935e-06		3.415e-07	2.78
Q6ZPJ3	(E3-independent) E2 ubiquitin-conjugating enzyme UBE2O OS=Mus musculus OX=10090 GN=Ube2o PE=1 SV=3	[K].VCVSLLGTWIGK.[G]	1xCarbamidomethyl [C2]	2.43393e-05	3.46687e-05	1	1	1	5	Q6ZPJ3 [1036-1047]	Q6ZPJ3 1xCarbamidomethyl [C1037]	0	1332.73	High	n/a	High		7.935e-06		1.878e-06	3.27
Q6ZPJ3	(E3-independent) E2 ubiquitin-conjugating enzyme UBE2O OS=Mus musculus OX=10090 GN=Ube2o PE=1 SV=3	[R].LGCFDHAQR.[Q]	1xCarbamidomethyl [C3]	6.70674e-05	3.46687e-05	1	1	1	17	Q6ZPJ3 [334-342]	Q6ZPJ3 1xCarbamidomethyl [C336]	0	1103.51	High	n/a	High		7.935e-06		5.442e-06	2.41
Q6ZPJ3	(E3-independent) E2 ubiquitin-conjugating enzyme UBE2O OS=Mus musculus OX=10090 GN=Ube2o PE=1 SV=3	[K].SFCPGGTDSVSPPPSIITQENLGR.[V]	1xCarbamidomethyl [C3]	6.01461e-11	3.46687e-05	1	1	1	2	Q6ZPJ3 [307-330]	Q6ZPJ3 1xCarbamidomethyl [C309]	0	2516.21	High	n/a	High		7.935e-06		2.264e-12	4.91
Q6ZPJ3	(E3-independent) E2 ubiquitin-conjugating enzyme UBE2O OS=Mus musculus OX=10090 GN=Ube2o PE=1 SV=3	[K].RLGCFDHAQR.[Q]	1xCarbamidomethyl [C4]	0.000793556	7.02174e-05	1	1	1	2	Q6ZPJ3 [333-342]	Q6ZPJ3 1xCarbamidomethyl [C336]	1	1259.61	High	n/a	High		1.496e-05		7.285e-05	3.14
Q6ZPJ3	(E3-independent) E2 ubiquitin-conjugating enzyme UBE2O OS=Mus musculus OX=10090 GN=Ube2o PE=1 SV=3	[K].IAWECPEK.[N]	1xCarbamidomethyl [C5]	0.00158596	0.000136771	1	1	1	5	Q6ZPJ3 [361-368]	Q6ZPJ3 1xCarbamidomethyl [C365]	0	1032.48	High	n/a	High		2.796e-05		0.0001492	1.65
Q6ZPJ3	(E3-independent) E2 ubiquitin-conjugating enzyme UBE2O OS=Mus musculus OX=10090 GN=Ube2o PE=1 SV=3	[K].LIGTNCIIYPVNSK.[D]	1xCarbamidomethyl [C6]	2.01937e-05	3.46687e-05	1	1	1	10	Q6ZPJ3 [172-185]	Q6ZPJ3 1xCarbamidomethyl [C177]	0	1591.85	High	n/a	High		7.935e-06		1.535e-06	3.83
Q6ZPJ3	(E3-independent) E2 ubiquitin-conjugating enzyme UBE2O OS=Mus musculus OX=10090 GN=Ube2o PE=1 SV=3	[R].VKRLGCFDHAQR.[Q]	1xCarbamidomethyl [C6]	0.0212697	0.000779279	1	1	1	1	Q6ZPJ3 [331-342]	Q6ZPJ3 1xCarbamidomethyl [C336]	2	1486.77	High	n/a	High		0.0002193		0.00219	1.81
Q6ZPJ3	(E3-independent) E2 ubiquitin-conjugating enzyme UBE2O OS=Mus musculus OX=10090 GN=Ube2o PE=1 SV=3	[R].IMSCTPDTQCPR.[D]	2xCarbamidomethyl [C4; C10]	8.75441e-06	3.46687e-05	1	1	1	1	Q6ZPJ3 [392-403]	Q6ZPJ3 2xCarbamidomethyl [C395; C401]	0	1465.62	High	n/a	High		7.935e-06		6.335e-07	2.74
Q6ZPJ3	(E3-independent) E2 ubiquitin-conjugating enzyme UBE2O OS=Mus musculus OX=10090 GN=Ube2o PE=1 SV=3	[R].IMSCTPDTQCPR.[D]	2xCarbamidomethyl [C4; C10]; 1xOxidation [M2]	1.60197e-06	3.46687e-05	1	1	1	1	Q6ZPJ3 [392-403]	Q6ZPJ3 2xCarbamidomethyl [C395; C401]	0	1481.62	High	n/a	High		7.935e-06		1.065e-07	2.3
Q8VD66	(Lyso)-N-acylphosphatidylethanolamine lipase OS=Mus musculus OX=10090 GN=Abhd4 PE=1 SV=1	[R].ILQCLQNK.[F]	1xCarbamidomethyl [C4]	0.0104499	0.000366757	1	1	1	2	Q8VD66 [35-42]	Q8VD66 1xCarbamidomethyl [C38]	0	1016.56	High	n/a	High		9.024e-05		0.001033	2.42
O55028	[3-methyl-2-oxobutanoate dehydrogenase [lipoamide]] kinase, mitochondrial OS=Mus musculus OX=10090 GN=Bckdk PE=1 SV=1	[R].MLATHHLALHEDKPDFVGIICTR.[L]	1xCarbamidomethyl [C21]	1.36399e-08	3.46687e-05	1	1	1	4	O55028 [202-224]	O55028 1xCarbamidomethyl [C222]	0	2674.36	High	n/a	High		7.935e-06		6.909e-10	4.78
O55028	[3-methyl-2-oxobutanoate dehydrogenase [lipoamide]] kinase, mitochondrial OS=Mus musculus OX=10090 GN=Bckdk PE=1 SV=1	[R].MLATHHLALHEDKPDFVGIICTR.[L]	1xCarbamidomethyl [C21]; 1xOxidation [M1]	0.00553299	0.000289748	1	1	1	2	O55028 [202-224]	O55028 1xCarbamidomethyl [C222]	0	2690.35	High	n/a	High		7.049e-05		0.0005313	1.34
O55028	[3-methyl-2-oxobutanoate dehydrogenase [lipoamide]] kinase, mitochondrial OS=Mus musculus OX=10090 GN=Bckdk PE=1 SV=1	[R].MLATHHLALHEDKPDFVGIICTRLSPK.[K]	1xCarbamidomethyl [C21]; 1xOxidation [M1]	0.0130223	0.000480989	1	1	1	1	O55028 [202-228]	O55028 1xCarbamidomethyl [C222]	1	3115.62	High	n/a	High		0.0001237		0.0013	2.81
O55028	[3-methyl-2-oxobutanoate dehydrogenase [lipoamide]] kinase, mitochondrial OS=Mus musculus OX=10090 GN=Bckdk PE=1 SV=1	[K].DQADEAQYCQLVR.[Q]	1xCarbamidomethyl [C9]	5.66035e-07	3.46687e-05	1	1	1	1	O55028 [144-156]	O55028 1xCarbamidomethyl [C152]	0	1595.71	High	n/a	High		7.935e-06		3.524e-08	3.46
Q8VDP3	[F-actin]-monooxygenase MICAL1 OS=Mus musculus OX=10090 GN=Mical1 PE=1 SV=1	[R].ASQPVYQQGQACTNTK.[CL]	1xCarbamidomethyl [C12]	0.0015443	0.000136771	1	3	1	1	Q8VDP3 [71-86]	Q8VDP3 1xCarbamidomethyl [C82]	0	1780.83	High	n/a	High		2.796e-05		0.0001451	1.48
Q8VDP3	[F-actin]-monooxygenase MICAL1 OS=Mus musculus OX=10090 GN=Mical1 PE=1 SV=1	[R].FCVDGHFFHR.[S]	1xCarbamidomethyl [C2]	3.44276e-05	3.46687e-05	1	3	1	5	Q8VDP3 [696-705]	Q8VDP3 1xCarbamidomethyl [C697]	0	1321.59	High	n/a	High		7.935e-06		2.685e-06	1.72
Q8VDP3	[F-actin]-monooxygenase MICAL1 OS=Mus musculus OX=10090 GN=Mical1 PE=1 SV=1	[R].FCTGTLDHISIR.[Q]	1xCarbamidomethyl [C2]	0.000141529	3.46687e-05	1	2	1	1	Q8VDP3 [147-158]	Q8VDP3 1xCarbamidomethyl [C148]	0	1419.7	High	n/a	High		7.935e-06		1.192e-05	2.29
Q8VDP3	[F-actin]-monooxygenase MICAL1 OS=Mus musculus OX=10090 GN=Mical1 PE=1 SV=1	[R].SCSDLAR.[E]	1xCarbamidomethyl [C2]	0.10033	0.00335258	1	3	1	2	Q8VDP3 [820-826]	Q8VDP3 1xCarbamidomethyl [C821]	0	808.362	High	n/a	High		0.0008617		0.0143	1.66
Q8BML1	[F-actin]-monooxygenase MICAL2 OS=Mus musculus OX=10090 GN=Mical2 PE=1 SV=1	[K].LLTWCQQQTK.[G]	1xCarbamidomethyl [C5]	0.000836987	7.02174e-05	1	3	1	1	Q8BML1 [522-531]	Q8BML1 1xCarbamidomethyl [C526]	0	1305.66	High	n/a	High		1.496e-05		7.669e-05	1.92
Q8BML1	[F-actin]-monooxygenase MICAL2 OS=Mus musculus OX=10090 GN=Mical2 PE=1 SV=1	[R].YPNLNLHCVRPHQVK.[H]	1xCarbamidomethyl [C8]	0.00119386	7.02174e-05	1	3	1	1	Q8BML1 [471-485]	Q8BML1 1xCarbamidomethyl [C478]	0	1874.98	High	n/a	High		1.496e-05		0.0001106	1.73
Q8CJ19	[F-actin]-monooxygenase MICAL3 OS=Mus musculus OX=10090 GN=Mical3 PE=1 SV=2	[K].SCSSTPSSGATVDSGQR.[R]	1xCarbamidomethyl [C2]	4.18196e-08	3.46687e-05	1	2	1	1	Q8CJ19 [1750-1766]	Q8CJ19 1xCarbamidomethyl [C1751]	0	1683.72	High	n/a	High		7.935e-06		2.264e-09	4.07
Q8CJ19	[F-actin]-monooxygenase MICAL3 OS=Mus musculus OX=10090 GN=Mical3 PE=1 SV=2	[K].FCAGAIDHISIR.[Q]	1xCarbamidomethyl [C2]	6.94216e-08	3.46687e-05	1	3	1	4	Q8CJ19 [149-160]	Q8CJ19 1xCarbamidomethyl [C150]	0	1359.68	High	n/a	High		7.935e-06		3.872e-09	3.34
Q8CJ19	[F-actin]-monooxygenase MICAL3 OS=Mus musculus OX=10090 GN=Mical3 PE=1 SV=2	[K].LLGWCQR.[Q]	1xCarbamidomethyl [C5]	0.0926321	0.00296911	1	3	1	6	Q8CJ19 [524-530]	Q8CJ19 1xCarbamidomethyl [C528]	0	932.477	High	n/a	High		0.00079		0.0128	1.24
Q8CJ19	[F-actin]-monooxygenase MICAL3 OS=Mus musculus OX=10090 GN=Mical3 PE=1 SV=2	[K].SGLALCAIIHR.[Y]	1xCarbamidomethyl [C6]	0.000164618	3.46687e-05	1	3	1	13	Q8CJ19 [549-559]	Q8CJ19 1xCarbamidomethyl [C554]	0	1210.67	High	n/a	High		7.935e-06		1.398e-05	3.55
Q8CJ19	[F-actin]-monooxygenase MICAL3 OS=Mus musculus OX=10090 GN=Mical3 PE=1 SV=2	[R].AFQELCDHLELKPK.[D]	1xCarbamidomethyl [C6]	7.79583e-07	3.46687e-05	1	3	1	4	Q8CJ19 [31-44]	Q8CJ19 1xCarbamidomethyl [C36]	0	1727.88	High	n/a	High		7.935e-06		4.935e-08	4.57
Q8CJ19	[F-actin]-monooxygenase MICAL3 OS=Mus musculus OX=10090 GN=Mical3 PE=1 SV=2	[R].FVQATTCKGTLR.[A]	1xCarbamidomethyl [C7]	5.32079e-06	3.46687e-05	1	3	1	1	Q8CJ19 [19-30]	Q8CJ19 1xCarbamidomethyl [C25]	1	1381.73	High	n/a	High		7.935e-06		3.769e-07	3.51
Q8CJ19	[F-actin]-monooxygenase MICAL3 OS=Mus musculus OX=10090 GN=Mical3 PE=1 SV=2	[R].FVQATTCK.[G]	1xCarbamidomethyl [C7]	0.0529032	0.00152429	1	3	1	4	Q8CJ19 [19-26]	Q8CJ19 1xCarbamidomethyl [C25]	0	954.471	High	n/a	High		0.0004295		0.006273	1.04
Q8CJ19	[F-actin]-monooxygenase MICAL3 OS=Mus musculus OX=10090 GN=Mical3 PE=1 SV=2	[K].DLEAAMLCK.[G]	1xCarbamidomethyl [C8]	0.000867252	7.02174e-05	1	2	1	1	Q8CJ19 [1978-1986]	Q8CJ19 1xCarbamidomethyl [C1985]	0	1050.5	High	n/a	High		1.496e-05		7.975e-05	1.89
Q8CJ19	[F-actin]-monooxygenase MICAL3 OS=Mus musculus OX=10090 GN=Mical3 PE=1 SV=2	[K].FYCKPHYCYR.[L]	2xCarbamidomethyl [C3; C8]	1.11299e-05	3.46687e-05	1	1	1	2	Q8CJ19 [812-821]	Q8CJ19 2xCarbamidomethyl [C814; C819]	0	1493.65	High	n/a	High		7.935e-06		8.209e-07	2.5
Q8CJ19	[F-actin]-monooxygenase MICAL3 OS=Mus musculus OX=10090 GN=Mical3 PE=1 SV=2	[K].ACTNTKCLIIGAGPCGLR.[T]	3xCarbamidomethyl [C2; C7; C15]	3.82909e-06	3.46687e-05	1	3	1	1	Q8CJ19 [83-100]	Q8CJ19 3xCarbamidomethyl [C84; C89; C97]	1	1961.97	High	n/a	High		7.935e-06		2.667e-07	2.19
P54923	[Protein ADP-ribosylarginine] hydrolase OS=Mus musculus OX=10090 GN=Adprh PE=1 SV=1	[R].IPFNSHEGGCGAAMR.[A]	1xCarbamidomethyl [C10]	5.55631e-09	3.46687e-05	1	1	1	4	P54923 [125-139]	P54923 1xCarbamidomethyl [C134]	0	1603.71	High	n/a	High		7.935e-06		2.688e-10	4.18
P54923	[Protein ADP-ribosylarginine] hydrolase OS=Mus musculus OX=10090 GN=Adprh PE=1 SV=1	[R].IPFNSHEGGCGAAMR.[A]	1xCarbamidomethyl [C10]; 1xOxidation [M14]	0.0342609	0.00111723	1	1	1	1	P54923 [125-139]	P54923 1xCarbamidomethyl [C134]	0	1619.71	High	n/a	High		0.0003292		0.003731	1.75
P54923	[Protein ADP-ribosylarginine] hydrolase OS=Mus musculus OX=10090 GN=Adprh PE=1 SV=1	[R].AMCIGLR.[F]	1xCarbamidomethyl [C3]	0.0373332	0.00114144	1	1	1	6	P54923 [140-146]	P54923 1xCarbamidomethyl [C142]	0	820.417	High	n/a	High		0.0003331		0.004104	1.48
P54923	[Protein ADP-ribosylarginine] hydrolase OS=Mus musculus OX=10090 GN=Adprh PE=1 SV=1	[R].AMCIGLR.[F]	1xCarbamidomethyl [C3]; 1xOxidation [M2]	0.0775132	0.00248815	1	1	1	6	P54923 [140-146]	P54923 1xCarbamidomethyl [C142]	0	836.412	High	n/a	High		0.0006576		0.01018	0.82
P54923	[Protein ADP-ribosylarginine] hydrolase OS=Mus musculus OX=10090 GN=Adprh PE=1 SV=1	[R].APGGACMQNAMLLQPNR.[A]	1xCarbamidomethyl [C6]	2.08932e-09	3.46687e-05	1	1	1	2	P54923 [103-119]	P54923 1xCarbamidomethyl [C108]	0	1828.86	High	n/a	High		7.935e-06		9.595e-11	5.73
P54923	[Protein ADP-ribosylarginine] hydrolase OS=Mus musculus OX=10090 GN=Adprh PE=1 SV=1	[R].APGGACMQNAMLLQPNR.[A]	1xCarbamidomethyl [C6]; 1xOxidation [M11]	1.34098e-06	3.46687e-05	1	1	1	1	P54923 [103-119]	P54923 1xCarbamidomethyl [C108]	0	1844.86	High	n/a	High		7.935e-06		8.777e-08	2.57
Q8BFP9	[Pyruvate dehydrogenase (acetyl-transferring)] kinase isozyme 1, mitochondrial OS=Mus musculus OX=10090 GN=Pdk1 PE=1 SV=2	[K].QFLDFGSVNACEK.[T]	1xCarbamidomethyl [C11]	1.63072e-06	3.46687e-05	1	1	1	3	Q8BFP9 [61-73]	Q8BFP9 1xCarbamidomethyl [C71]	0	1514.69	High	n/a	High		7.935e-06		1.081e-07	3.28
Q8BFP9	[Pyruvate dehydrogenase (acetyl-transferring)] kinase isozyme 1, mitochondrial OS=Mus musculus OX=10090 GN=Pdk1 PE=1 SV=2	[R].LCDLYYVNSPELELEELNAK.[S]	1xCarbamidomethyl [C2]	1.87931e-07	3.46687e-05	1	1	1	1	Q8BFP9 [237-256]	Q8BFP9 1xCarbamidomethyl [C238]	0	2412.16	High	n/a	High		7.935e-06		1.11e-08	2.6
Q8BFP9	[Pyruvate dehydrogenase (acetyl-transferring)] kinase isozyme 1, mitochondrial OS=Mus musculus OX=10090 GN=Pdk1 PE=1 SV=2	[K].ANHEADDWCVPSREPK.[D]	1xCarbamidomethyl [C9]	3.38208e-05	3.46687e-05	1	1	1	2	Q8BFP9 [411-426]	Q8BFP9 1xCarbamidomethyl [C419]	1	1910.84	High	n/a	High		7.935e-06		2.644e-06	2.45
Q8BFP9	[Pyruvate dehydrogenase (acetyl-transferring)] kinase isozyme 1, mitochondrial OS=Mus musculus OX=10090 GN=Pdk1 PE=1 SV=2	[K].ANHEADDWCVPSR.[E]	1xCarbamidomethyl [C9]	4.18357e-07	3.46687e-05	1	1	1	2	Q8BFP9 [411-423]	Q8BFP9 1xCarbamidomethyl [C419]	0	1556.65	High	n/a	High		7.935e-06		2.566e-08	2.61
Q8BFP9	[Pyruvate dehydrogenase (acetyl-transferring)] kinase isozyme 1, mitochondrial OS=Mus musculus OX=10090 GN=Pdk1 PE=1 SV=2	[K].HIGSINPNCDVVEVIK.[D]	1xCarbamidomethyl [C9]	2.77808e-08	3.46687e-05	1	1	1	4	Q8BFP9 [213-228]	Q8BFP9 1xCarbamidomethyl [C221]	0	1793.92	High	n/a	High		7.935e-06		1.474e-09	4.39
Q9JK42	[Pyruvate dehydrogenase (acetyl-transferring)] kinase isozyme 2, mitochondrial OS=Mus musculus OX=10090 GN=Pdk2 PE=1 SV=2	[K].QFLDFGSSNACEK.[T]	1xCarbamidomethyl [C11]	2.49883e-06	3.46687e-05	1	1	1	2	Q9JK42 [35-47]	Q9JK42 1xCarbamidomethyl [C45]	0	1502.66	High	n/a	High		7.935e-06		1.7e-07	2.55
Q9JK42	[Pyruvate dehydrogenase (acetyl-transferring)] kinase isozyme 2, mitochondrial OS=Mus musculus OX=10090 GN=Pdk2 PE=1 SV=2	[R].HYQTIQEAGDWCVPSTEPK.[N]	1xCarbamidomethyl [C12]	2.28185e-11	3.46687e-05	1	1	1	5	Q9JK42 [381-399]	Q9JK42 1xCarbamidomethyl [C392]	0	2246.02	High	n/a	High		7.935e-06		8.154e-13	4.49
Q9JK42	[Pyruvate dehydrogenase (acetyl-transferring)] kinase isozyme 2, mitochondrial OS=Mus musculus OX=10090 GN=Pdk2 PE=1 SV=2	[K].HIGSIDPNCSVSDVVK.[D]	1xCarbamidomethyl [C9]	3.79084e-09	3.46687e-05	1	1	1	7	Q9JK42 [187-202]	Q9JK42 1xCarbamidomethyl [C195]	0	1726.84	High	n/a	High		7.935e-06		1.804e-10	4.14
Q922H2	[Pyruvate dehydrogenase (acetyl-transferring)] kinase isozyme 3, mitochondrial OS=Mus musculus OX=10090 GN=Pdk3 PE=1 SV=1	[K].HIGSIDPTCNVADVVK.[D]	1xCarbamidomethyl [C9]	5.03858e-09	3.46687e-05	1	1	1	4	Q922H2 [183-198]	Q922H2 1xCarbamidomethyl [C191]	0	1724.86	High	n/a	High		7.935e-06		2.438e-10	5.87
Q3UV70	[Pyruvate dehydrogenase [acetyl-transferring]]-phosphatase 1, mitochondrial OS=Mus musculus OX=10090 GN=Pdp1 PE=1 SV=1	[R].SAATCLQTR.[G]	1xCarbamidomethyl [C5]	0.00228163	0.000136771	1	1	1	3	Q3UV70 [128-136]	Q3UV70 1xCarbamidomethyl [C132]	0	1007.49	High	n/a	High		2.796e-05		0.0002151	1.91
Q3UV70	[Pyruvate dehydrogenase [acetyl-transferring]]-phosphatase 1, mitochondrial OS=Mus musculus OX=10090 GN=Pdp1 PE=1 SV=1	[R].VAFSGATACVAHVDGVDLHVANTGDSR.[A]	1xCarbamidomethyl [C9]	2.14905e-05	3.46687e-05	1	1	1	2	Q3UV70 [267-293]	Q3UV70 1xCarbamidomethyl [C275]	0	2726.3	High	n/a	High		7.935e-06		1.637e-06	5.03
Q3UV70	[Pyruvate dehydrogenase [acetyl-transferring]]-phosphatase 1, mitochondrial OS=Mus musculus OX=10090 GN=Pdp1 PE=1 SV=1	[R].GMLLGVFDGHAGCACSQAVSER.[L]	2xCarbamidomethyl [C13; C15]	9.46567e-11	3.46687e-05	1	1	1	3	Q3UV70 [137-158]	Q3UV70 2xCarbamidomethyl [C149; C151]	0	2322.04	High	n/a	High		7.935e-06		3.662e-12	5.77
Q3UV70	[Pyruvate dehydrogenase [acetyl-transferring]]-phosphatase 1, mitochondrial OS=Mus musculus OX=10090 GN=Pdp1 PE=1 SV=1	[R].GMLLGVFDGHAGCACSQAVSER.[L]	2xCarbamidomethyl [C13; C15]; 1xOxidation [M2]	2.36629e-09	3.46687e-05	1	1	1	1	Q3UV70 [137-158]	Q3UV70 2xCarbamidomethyl [C149; C151]	0	2338.04	High	n/a	High		7.935e-06		1.095e-10	6.62
Q99JT9	1,2-dihydroxy-3-keto-5-methylthiopentene dioxygenase OS=Mus musculus OX=10090 GN=Adi1 PE=1 SV=1	[R].NYSWMDIITICK.[D]	1xCarbamidomethyl [C11]	0.00046157	3.46687e-05	1	1	1	1	Q99JT9 [60-71]	Q99JT9 1xCarbamidomethyl [C70]	0	1543.73	High	n/a	High		7.935e-06		4.158e-05	1.69
Q9DCT1	1,5-anhydro-D-fructose reductase OS=Mus musculus OX=10090 GN=Akr1e2 PE=1 SV=1	[R].VRPITNQIECHPYLNQK.[K]	1xCarbamidomethyl [C10]	7.38515e-09	3.46687e-05	1	1	1	1	Q9DCT1 [169-185]	Q9DCT1 1xCarbamidomethyl [C178]	0	2110.09	High	n/a	High		7.935e-06		3.641e-10	4.34
Q9DCT1	1,5-anhydro-D-fructose reductase OS=Mus musculus OX=10090 GN=Akr1e2 PE=1 SV=1	[K].LIDFCHK.[R]	1xCarbamidomethyl [C5]	0.128808	0.00414757	1	1	1	1	Q9DCT1 [187-193]	Q9DCT1 1xCarbamidomethyl [C191]	0	932.466	High	n/a	High		0.001036		0.02027	1.56
O08810	116 kDa U5 small nuclear ribonucleoprotein component OS=Mus musculus OX=10090 GN=Eftud2 PE=1 SV=1	[K].CFAETPNK.[K]	1xCarbamidomethyl [C1]	0.00128172	0.000106916	1	1	1	1	O08810 [673-680]	O08810 1xCarbamidomethyl [C673]	0	966.435	High	n/a	High		2.232e-05		0.000119	2
O08810	116 kDa U5 small nuclear ribonucleoprotein component OS=Mus musculus OX=10090 GN=Eftud2 PE=1 SV=1	[K].FFGEFTGFVDMCVQHIPSPK.[V]	1xCarbamidomethyl [C12]	9.48634e-05	3.46687e-05	1	1	1	1	O08810 [422-441]	O08810 1xCarbamidomethyl [C433]	0	2343.09	High	n/a	High		7.935e-06		7.871e-06	3.01
O08810	116 kDa U5 small nuclear ribonucleoprotein component OS=Mus musculus OX=10090 GN=Eftud2 PE=1 SV=1	[K].FFGEFTGFVDMCVQHIPSPK.[V]	1xCarbamidomethyl [C12]; 1xOxidation [M11]	7.59348e-06	3.46687e-05	1	1	1	2	O08810 [422-441]	O08810 1xCarbamidomethyl [C433]	0	2359.09	High	n/a	High		7.935e-06		5.45e-07	3.22
O08810	116 kDa U5 small nuclear ribonucleoprotein component OS=Mus musculus OX=10090 GN=Eftud2 PE=1 SV=1	[K].VEESGEHVILGTGELYLDCVMHDLR.[K]	1xCarbamidomethyl [C19]	9.73278e-08	3.46687e-05	1	1	1	2	O08810 [620-644]	O08810 1xCarbamidomethyl [C638]	0	2871.37	High	n/a	High		7.935e-06		5.544e-09	6.15
O08810	116 kDa U5 small nuclear ribonucleoprotein component OS=Mus musculus OX=10090 GN=Eftud2 PE=1 SV=1	[K].VEESGEHVILGTGELYLDCVMHDLR.[K]	1xCarbamidomethyl [C19]; 1xOxidation [M21]	1.22595e-08	3.46687e-05	1	1	1	3	O08810 [620-644]	O08810 1xCarbamidomethyl [C638]	0	2887.36	High	n/a	High		7.935e-06		6.196e-10	5.55
O08810	116 kDa U5 small nuclear ribonucleoprotein component OS=Mus musculus OX=10090 GN=Eftud2 PE=1 SV=1	[R].NVTLCGHLHHGK.[T]	1xCarbamidomethyl [C5]	3.32005e-07	3.46687e-05	1	1	1	21	O08810 [130-141]	O08810 1xCarbamidomethyl [C134]	0	1372.69	High	n/a	High		7.935e-06		2.005e-08	2.49
O08810	116 kDa U5 small nuclear ribonucleoprotein component OS=Mus musculus OX=10090 GN=Eftud2 PE=1 SV=1	[R].EGPLCDELIR.[N]	1xCarbamidomethyl [C5]	0.00109245	7.02174e-05	1	1	1	4	O08810 [775-784]	O08810 1xCarbamidomethyl [C779]	0	1201.59	High	n/a	High		1.496e-05		0.000101	2.81
O08810	116 kDa U5 small nuclear ribonucleoprotein component OS=Mus musculus OX=10090 GN=Eftud2 PE=1 SV=1	[R].LAVTVCINKIDR.[L]	1xCarbamidomethyl [C6]	0.00153065	0.000136771	1	1	1	2	O08810 [250-261]	O08810 1xCarbamidomethyl [C255]	1	1401.79	High	n/a	High		2.796e-05		0.0001429	1.55
O08810	116 kDa U5 small nuclear ribonucleoprotein component OS=Mus musculus OX=10090 GN=Eftud2 PE=1 SV=1	[R].LAVTVCINK.[I]	1xCarbamidomethyl [C6]	0.00133988	0.000136771	1	1	1	8	O08810 [250-258]	O08810 1xCarbamidomethyl [C255]	0	1017.58	High	n/a	High		2.796e-05		0.0001251	2.45
O08810	116 kDa U5 small nuclear ribonucleoprotein component OS=Mus musculus OX=10090 GN=Eftud2 PE=1 SV=1	[K].VADPVVTFCETVVETSSLK.[C]	1xCarbamidomethyl [C9]	1.42491e-10	3.46687e-05	1	1	1	8	O08810 [654-672]	O08810 1xCarbamidomethyl [C662]	0	2081.05	High	n/a	High		7.935e-06		5.658e-12	4.43
O08810	116 kDa U5 small nuclear ribonucleoprotein component OS=Mus musculus OX=10090 GN=Eftud2 PE=1 SV=1	[K].TCFVDCLIEQTHPEIR.[K]	2xCarbamidomethyl [C2; C6]	8.43886e-09	3.46687e-05	1	1	1	3	O08810 [142-157]	O08810 2xCarbamidomethyl [C143; C147]	0	2017.95	High	n/a	High		7.935e-06		4.195e-10	4.08
Q9DCL4	12S rRNA N4-methylcytidine methyltransferase OS=Mus musculus OX=10090 GN=Mettl15 PE=1 SV=2	[K].AVEGTALCGPQK.[V]	1xCarbamidomethyl [C8]	0.000597221	3.46687e-05	1	1	1	1	Q9DCL4 [45-56]	Q9DCL4 1xCarbamidomethyl [C52]	0	1230.61	High	n/a	High		7.935e-06		5.436e-05	1.84
Q9DAK9	14 kDa phosphohistidine phosphatase OS=Mus musculus OX=10090 GN=Phpt1 PE=1 SV=1	[R].VHLAEPSGDPAKECKEIVR.[G]	1xCarbamidomethyl [C14]	1.89464e-09	3.46687e-05	1	1	1	3	Q9DAK9 [26-44]	Q9DAK9 1xCarbamidomethyl [C39]	2	2135.09	High	n/a	High		7.935e-06		8.634e-11	3.54
Q9CQV8	14-3-3 protein beta/alpha OS=Mus musculus OX=10090 GN=Ywhab PE=1 SV=3	[R].EKIEAELQDICNDVLELLDK.[Y]	1xCarbamidomethyl [C11]	1.43929e-07	3.46687e-05	1	2	1	1	Q9CQV8 [86-105]	Q9CQV8 1xCarbamidomethyl [C96]	1	2387.2	High	n/a	High		7.935e-06		8.303e-09	3.19
Q9CQV8	14-3-3 protein beta/alpha OS=Mus musculus OX=10090 GN=Ywhab PE=1 SV=3	[K].IEAELQDICNDVLELLDK.[Y]	1xCarbamidomethyl [C9]	2.85318e-08	3.46687e-05	1	2	1	17	Q9CQV8 [88-105]	Q9CQV8 1xCarbamidomethyl [C96]	0	2130.06	High	n/a	High		7.935e-06		1.519e-09	4.42
P62259	14-3-3 protein epsilon OS=Mus musculus OX=10090 GN=Ywhae PE=1 SV=1	[K].LICCDILDVLDKHLIPAANTGESK.[V]	2xCarbamidomethyl [C3; C4]	2.41238e-05	3.46687e-05	1	1	1	2	P62259 [95-118]	P62259 2xCarbamidomethyl [C97; C98]	1	2695.38	High	n/a	High		7.935e-06		1.846e-06	3.48
P62259	14-3-3 protein epsilon OS=Mus musculus OX=10090 GN=Ywhae PE=1 SV=1	[K].LICCDILDVLDK.[H]	2xCarbamidomethyl [C3; C4]	9.48022e-07	3.46687e-05	1	1	1	31	P62259 [95-106]	P62259 2xCarbamidomethyl [C97; C98]	0	1476.74	High	n/a	High		7.935e-06		6.08e-08	3.04
P68510	14-3-3 protein eta OS=Mus musculus OX=10090 GN=Ywhah PE=1 SV=2	[K].NCNDFQYESK.[V]	1xCarbamidomethyl [C2]	0.00026135	3.46687e-05	1	1	1	8	P68510 [111-120]	P68510 1xCarbamidomethyl [C112]	0	1304.52	High	n/a	High		7.935e-06		2.291e-05	2.86
P68510	14-3-3 protein eta OS=Mus musculus OX=10090 GN=Ywhah PE=1 SV=2	[K].ELETVCNDVLALLDK.[F]	1xCarbamidomethyl [C6]	2.30577e-07	3.46687e-05	1	1	1	12	P68510 [92-106]	P68510 1xCarbamidomethyl [C97]	0	1731.88	High	n/a	High		7.935e-06		1.371e-08	3.65
P61982	14-3-3 protein gamma OS=Mus musculus OX=10090 GN=Ywhag PE=1 SV=2	[K].NCSETQYESKVFYLK.[M]	1xCarbamidomethyl [C2]	4.41598e-05	3.46687e-05	1	1	1	1	P61982 [111-125]	P61982 1xCarbamidomethyl [C112]	1	1895.88	High	n/a	High		7.935e-06		3.497e-06	1.55
P61982	14-3-3 protein gamma OS=Mus musculus OX=10090 GN=Ywhag PE=1 SV=2	[K].NCSETQYESK.[V]	1xCarbamidomethyl [C2]	0.000203767	3.46687e-05	1	1	1	4	P61982 [111-120]	P61982 1xCarbamidomethyl [C112]	0	1245.51	High	n/a	High		7.935e-06		1.76e-05	2.24
P61982	14-3-3 protein gamma OS=Mus musculus OX=10090 GN=Ywhag PE=1 SV=2	[R].LGLALNYSVFYYEIQNAPEQACHLAK.[T]	1xCarbamidomethyl [C22]	1.79893e-05	3.46687e-05	1	1	1	2	P61982 [173-198]	P61982 1xCarbamidomethyl [C194]	0	3012.49	High	n/a	High		7.935e-06		1.365e-06	2.38
P61982	14-3-3 protein gamma OS=Mus musculus OX=10090 GN=Ywhag PE=1 SV=2	[K].ELEAVCQDVLSLLDNYLIK.[N]	1xCarbamidomethyl [C6]	5.45837e-09	3.46687e-05	1	1	1	10	P61982 [92-110]	P61982 1xCarbamidomethyl [C97]	0	2235.16	High	n/a	High		7.935e-06		2.643e-10	4.72
P61982	14-3-3 protein gamma OS=Mus musculus OX=10090 GN=Ywhag PE=1 SV=2	[K].ELEAVCQDVLSLLDNYLIKNCSETQYESK.[V]	2xCarbamidomethyl [C6; C21]	3.65698e-10	3.46687e-05	1	1	1	2	P61982 [92-120]	P61982 2xCarbamidomethyl [C97; C112]	1	3461.65	High	n/a	High		7.935e-06		1.531e-11	3.97
P68254	14-3-3 protein theta OS=Mus musculus OX=10090 GN=Ywhaq PE=1 SV=1	[R].SICTTVLELLDKYLIANATNPESK.[V]	1xCarbamidomethyl [C3]	9.22714e-08	3.46687e-05	1	2	1	2	P68254 [92-115]	P68254 1xCarbamidomethyl [C94]	1	2693.41	High	n/a	High		7.935e-06		5.193e-09	5.89
P68254	14-3-3 protein theta OS=Mus musculus OX=10090 GN=Ywhaq PE=1 SV=1	[R].SICTTVLELLDK.[Y]	1xCarbamidomethyl [C3]	1.41499e-05	3.46687e-05	1	2	1	19	P68254 [92-103]	P68254 1xCarbamidomethyl [C94]	0	1391.75	High	n/a	High		7.935e-06		1.058e-06	3.53
P68254	14-3-3 protein theta OS=Mus musculus OX=10090 GN=Ywhaq PE=1 SV=1	[R].YLAEVACGDDRK.[Q]	1xCarbamidomethyl [C7]	1.0741e-05	3.46687e-05	1	2	1	3	P68254 [128-139]	P68254 1xCarbamidomethyl [C134]	1	1396.65	High	n/a	High		7.935e-06		7.89e-07	2.07
P68254	14-3-3 protein theta OS=Mus musculus OX=10090 GN=Ywhaq PE=1 SV=1	[R].YLAEVACGDDR.[K]	1xCarbamidomethyl [C7]	1.50586e-05	3.46687e-05	1	2	1	9	P68254 [128-138]	P68254 1xCarbamidomethyl [C134]	0	1268.56	High	n/a	High		7.935e-06		1.124e-06	2.93
P68254	14-3-3 protein theta OS=Mus musculus OX=10090 GN=Ywhaq PE=1 SV=1	[R].YDDMATCMKAVTEQGAELSNEER.[N]	1xCarbamidomethyl [C7]	2.65421e-11	3.46687e-05	1	2	1	3	P68254 [19-41]	P68254 1xCarbamidomethyl [C25]	1	2648.13	High	n/a	High		7.935e-06		9.583e-13	5.84
P68254	14-3-3 protein theta OS=Mus musculus OX=10090 GN=Ywhaq PE=1 SV=1	[R].YDDMATCMK.[A]	1xCarbamidomethyl [C7]	0.00028061	3.46687e-05	1	2	1	3	P68254 [19-27]	P68254 1xCarbamidomethyl [C25]	0	1134.43	High	n/a	High		7.935e-06		2.463e-05	1.67
P68254	14-3-3 protein theta OS=Mus musculus OX=10090 GN=Ywhaq PE=1 SV=1	[R].YDDMATCMK.[A]	1xCarbamidomethyl [C7]; 1xOxidation [M]	4.49521e-05	3.46687e-05	1	2	2	11	P68254 [19-27]	P68254 1xCarbamidomethyl [C25]	0	1150.42	High	n/a	High		7.935e-06		3.566e-06	0.43
P68254	14-3-3 protein theta OS=Mus musculus OX=10090 GN=Ywhaq PE=1 SV=1	[R].YDDMATCMKAVTEQGAELSNEER.[N]	1xCarbamidomethyl [C7]; 1xOxidation [M4]	2.18514e-08	3.46687e-05	1	2	1	1	P68254 [19-41]	P68254 1xCarbamidomethyl [C25]	1	2664.12	High	n/a	High		7.935e-06		1.136e-09	3.61
P68254	14-3-3 protein theta OS=Mus musculus OX=10090 GN=Ywhaq PE=1 SV=1	[R].YDDMATCMK.[A]	1xCarbamidomethyl [C7]; 2xOxidation [M4; M8]	0.000157461	3.46687e-05	1	2	1	5	P68254 [19-27]	P68254 1xCarbamidomethyl [C25]	0	1166.42	High	n/a	High		7.935e-06		1.333e-05	1.13
P68254	14-3-3 protein theta OS=Mus musculus OX=10090 GN=Ywhaq PE=1 SV=1	[K].VESELRSICTTVLELLDK.[Y]	1xCarbamidomethyl [C9]	6.2953e-08	3.46687e-05	1	2	1	2	P68254 [86-103]	P68254 1xCarbamidomethyl [C94]	1	2105.12	High	n/a	High		7.935e-06		3.49e-09	4.74
P63101	14-3-3 protein zeta/delta OS=Mus musculus OX=10090 GN=Ywhaz PE=1 SV=1	[R].EKIETELRDICNDVLSLLEK.[F]	1xCarbamidomethyl [C11]	4.14654e-07	3.46687e-05	1	1	1	1	P63101 [84-103]	P63101 1xCarbamidomethyl [C94]	2	2417.26	High	n/a	High		7.935e-06		2.536e-08	5.07
P63101	14-3-3 protein zeta/delta OS=Mus musculus OX=10090 GN=Ywhaz PE=1 SV=1	[K].LAEQAERYDDMAACMKSVTEQGAELSNEER.[N]	1xCarbamidomethyl [C14]	2.79859e-12	3.46687e-05	1	1	1	3	P63101 [12-41]	P63101 1xCarbamidomethyl [C25]	2	3431.51	High	n/a	High		7.935e-06		8.899e-14	7.8
P63101	14-3-3 protein zeta/delta OS=Mus musculus OX=10090 GN=Ywhaz PE=1 SV=1	[R].DICNDVLSLLEK.[F]	1xCarbamidomethyl [C3]	4.37376e-07	3.46687e-05	1	1	1	36	P63101 [92-103]	P63101 1xCarbamidomethyl [C94]	0	1418.72	High	n/a	High		7.935e-06		2.688e-08	1.55
P63101	14-3-3 protein zeta/delta OS=Mus musculus OX=10090 GN=Ywhaz PE=1 SV=1	[R].YDDMAACMKSVTEQGAELSNEER.[N]	1xCarbamidomethyl [C7]	8.58368e-11	3.46687e-05	1	1	1	6	P63101 [19-41]	P63101 1xCarbamidomethyl [C25]	1	2634.11	High	n/a	High		7.935e-06		3.305e-12	5.82
P63101	14-3-3 protein zeta/delta OS=Mus musculus OX=10090 GN=Ywhaz PE=1 SV=1	[R].YDDMAACMK.[S]	1xCarbamidomethyl [C7]	0.000256745	3.46687e-05	1	1	1	17	P63101 [19-27]	P63101 1xCarbamidomethyl [C25]	0	1104.42	High	n/a	High		7.935e-06		2.241e-05	2.39
P63101	14-3-3 protein zeta/delta OS=Mus musculus OX=10090 GN=Ywhaz PE=1 SV=1	[R].YDDMAACMKSVTEQGAELSNEER.[N]	1xCarbamidomethyl [C7]; 1xOxidation [M]	4.76948e-13	3.46687e-05	1	1	2	5	P63101 [19-41]	P63101 1xCarbamidomethyl [C25]	1	2650.11	High	n/a	High		7.935e-06		1.379e-14	5.69
P63101	14-3-3 protein zeta/delta OS=Mus musculus OX=10090 GN=Ywhaz PE=1 SV=1	[R].YDDMAACMK.[S]	1xCarbamidomethyl [C7]; 1xOxidation [M]	0.000119533	3.46687e-05	1	1	2	26	P63101 [19-27]	P63101 1xCarbamidomethyl [C25]	0	1120.41	High	n/a	High		7.935e-06		1.003e-05	1.89
P63101	14-3-3 protein zeta/delta OS=Mus musculus OX=10090 GN=Ywhaz PE=1 SV=1	[R].YDDMAACMK.[S]	1xCarbamidomethyl [C7]; 2xOxidation [M4; M8]	7.01161e-05	3.46687e-05	1	1	1	10	P63101 [19-27]	P63101 1xCarbamidomethyl [C25]	0	1136.41	High	n/a	High		7.935e-06		5.716e-06	1.44
P63101	14-3-3 protein zeta/delta OS=Mus musculus OX=10090 GN=Ywhaz PE=1 SV=1	[K].IETELRDICNDVLSLLEK.[F]	1xCarbamidomethyl [C9]	3.26153e-07	3.46687e-05	1	1	1	8	P63101 [86-103]	P63101 1xCarbamidomethyl [C94]	1	2160.12	High	n/a	High		7.935e-06		1.981e-08	3.28
P58871	182 kDa tankyrase-1-binding protein OS=Mus musculus OX=10090 GN=Tnks1bp1 PE=1 SV=2	[R].LCGAPSEVR.[E]	1xCarbamidomethyl [C2]	0.00187716	0.000136771	1	1	1	2	P58871 [1345-1353]	P58871 1xCarbamidomethyl [C1346]	0	988.488	High	n/a	High		2.796e-05		0.0001766	2.62
P58871	182 kDa tankyrase-1-binding protein OS=Mus musculus OX=10090 GN=Tnks1bp1 PE=1 SV=2	[R].FAACTVEEILAK.[M]	1xCarbamidomethyl [C4]	2.95979e-05	3.46687e-05	1	1	1	1	P58871 [156-167]	P58871 1xCarbamidomethyl [C159]	0	1351.69	High	n/a	High		7.935e-06		2.295e-06	3.7
P58871	182 kDa tankyrase-1-binding protein OS=Mus musculus OX=10090 GN=Tnks1bp1 PE=1 SV=2	[R].TYGAPCPR.[E]	1xCarbamidomethyl [C6]	0.00226148	0.000136771	1	1	1	1	P58871 [201-208]	P58871 1xCarbamidomethyl [C206]	0	921.425	High	n/a	High		2.796e-05		0.000214	0.94
O35083	1-acyl-sn-glycerol-3-phosphate acyltransferase alpha OS=Mus musculus OX=10090 GN=Agpat1 PE=1 SV=1	[R].EISTDGLGGGDCLKKPGGAGEAR.[L]	1xCarbamidomethyl [C12]	1.84406e-10	3.46687e-05	1	1	1	5	O35083 [262-284]	O35083 1xCarbamidomethyl [C273]	1	2245.09	High	n/a	High		7.935e-06		7.395e-12	6.59
O35083	1-acyl-sn-glycerol-3-phosphate acyltransferase alpha OS=Mus musculus OX=10090 GN=Agpat1 PE=1 SV=1	[R].EISTDGLGGGDCLK.[K]	1xCarbamidomethyl [C12]	1.43985e-06	3.46687e-05	1	1	1	2	O35083 [262-275]	O35083 1xCarbamidomethyl [C273]	0	1421.66	High	n/a	High		7.935e-06		9.503e-08	2.15
O35083	1-acyl-sn-glycerol-3-phosphate acyltransferase alpha OS=Mus musculus OX=10090 GN=Agpat1 PE=1 SV=1	[R].FTSPGRCQVR.[V]	1xCarbamidomethyl [C7]	0.000536829	3.46687e-05	1	1	1	6	O35083 [221-230]	O35083 1xCarbamidomethyl [C227]	1	1207.6	High	n/a	High		7.935e-06		4.826e-05	2.39
O35083	1-acyl-sn-glycerol-3-phosphate acyltransferase alpha OS=Mus musculus OX=10090 GN=Agpat1 PE=1 SV=1	[R].FTSPGRCQVRVLPPVSTEGLTPDDVPALADSVR.[H]	1xCarbamidomethyl [C7]	1.32809e-08	3.46687e-05	1	1	1	4	O35083 [221-253]	O35083 1xCarbamidomethyl [C227]	2	3536.82	High	n/a	High		0.0002131		1.671e-06	6.41
Q8K4X7	1-acyl-sn-glycerol-3-phosphate acyltransferase delta OS=Mus musculus OX=10090 GN=Agpat4 PE=1 SV=1	[R].DYPEKYLFLIHCEGTR.[F]	1xCarbamidomethyl [C12]	4.99206e-10	3.46687e-05	1	1	1	1	Q8K4X7 [164-179]	Q8K4X7 1xCarbamidomethyl [C175]	1	2040.98	High	n/a	High		7.935e-06		2.118e-11	4.82
Q8K4X7	1-acyl-sn-glycerol-3-phosphate acyltransferase delta OS=Mus musculus OX=10090 GN=Agpat4 PE=1 SV=1	[R].DYPEKYLFLIHCEGTRFTEK.[K]	1xCarbamidomethyl [C12]	4.48683e-10	3.46687e-05	1	1	1	2	Q8K4X7 [164-183]	Q8K4X7 1xCarbamidomethyl [C175]	2	2546.24	High	n/a	High		7.935e-06		1.889e-11	6.19
Q8K4X7	1-acyl-sn-glycerol-3-phosphate acyltransferase delta OS=Mus musculus OX=10090 GN=Agpat4 PE=1 SV=1	[R].IPMEDIPEDEDKCSAWLHK.[L]	1xCarbamidomethyl [C13]	6.12723e-09	3.46687e-05	1	1	1	2	Q8K4X7 [258-276]	Q8K4X7 1xCarbamidomethyl [C270]	1	2313.05	High	n/a	High		7.935e-06		2.969e-10	3.74
Q8K4X7	1-acyl-sn-glycerol-3-phosphate acyltransferase delta OS=Mus musculus OX=10090 GN=Agpat4 PE=1 SV=1	[R].IPMEDIPEDEDKCSAWLHKLYQEK.[D]	1xCarbamidomethyl [C13]	6.23238e-11	3.46687e-05	1	1	1	3	Q8K4X7 [258-281]	Q8K4X7 1xCarbamidomethyl [C270]	2	2974.4	High	n/a	High		7.935e-06		2.361e-12	5.84
Q8K4X7	1-acyl-sn-glycerol-3-phosphate acyltransferase delta OS=Mus musculus OX=10090 GN=Agpat4 PE=1 SV=1	[R].IPMEDIPEDEDKCSAWLHKLYQEK.[D]	1xCarbamidomethyl [C13]; 1xOxidation [M3]	1.07246e-09	3.46687e-05	1	1	1	1	Q8K4X7 [258-281]	Q8K4X7 1xCarbamidomethyl [C270]	2	2990.39	High	n/a	High		7.935e-06		4.735e-11	5.33
Q8K4X7	1-acyl-sn-glycerol-3-phosphate acyltransferase delta OS=Mus musculus OX=10090 GN=Agpat4 PE=1 SV=1	[K].ACPHYGK.[E]	1xCarbamidomethyl [C2]	0.0238201	0.000806488	1	1	1	7	Q8K4X7 [81-87]	Q8K4X7 1xCarbamidomethyl [C82]	0	832.377	High	n/a	High		0.0002409		0.002486	1
Q8K4X7	1-acyl-sn-glycerol-3-phosphate acyltransferase delta OS=Mus musculus OX=10090 GN=Agpat4 PE=1 SV=1	[K].YHADCYVR.[R]	1xCarbamidomethyl [C5]	0.00740726	0.000314522	1	1	1	13	Q8K4X7 [249-256]	Q8K4X7 1xCarbamidomethyl [C253]	0	1083.47	High	n/a	High		7.473e-05		0.0007207	1.87
Q8K4X7	1-acyl-sn-glycerol-3-phosphate acyltransferase delta OS=Mus musculus OX=10090 GN=Agpat4 PE=1 SV=1	[K].KYHADCYVR.[R]	1xCarbamidomethyl [C6]	0.00409512	0.000259952	1	1	1	4	Q8K4X7 [248-256]	Q8K4X7 1xCarbamidomethyl [C253]	1	1211.56	High	n/a	High		5.247e-05		0.0003929	2.6
Q8K4X7	1-acyl-sn-glycerol-3-phosphate acyltransferase delta OS=Mus musculus OX=10090 GN=Agpat4 PE=1 SV=1	[K].YLFLIHCEGTRFTEK.[K]	1xCarbamidomethyl [C7]	1.23785e-06	3.46687e-05	1	1	1	1	Q8K4X7 [169-183]	Q8K4X7 1xCarbamidomethyl [C175]	1	1913.96	High	n/a	High		7.935e-06		8.104e-08	3.3
Q8K4X7	1-acyl-sn-glycerol-3-phosphate acyltransferase delta OS=Mus musculus OX=10090 GN=Agpat4 PE=1 SV=1	[K].YLFLIHCEGTR.[F]	1xCarbamidomethyl [C7]	1.1946e-06	3.46687e-05	1	1	1	19	Q8K4X7 [169-179]	Q8K4X7 1xCarbamidomethyl [C175]	0	1408.7	High	n/a	High		7.935e-06		7.748e-08	2.6
Q8K4X7	1-acyl-sn-glycerol-3-phosphate acyltransferase delta OS=Mus musculus OX=10090 GN=Agpat4 PE=1 SV=1	[K].GFAITVKCLR.[D]	1xCarbamidomethyl [C8]	0.00626228	0.000314522	1	1	1	1	Q8K4X7 [210-219]	Q8K4X7 1xCarbamidomethyl [C217]	1	1164.66	High	n/a	High		7.473e-05		0.0006033	3.37
Q8K4X7	1-acyl-sn-glycerol-3-phosphate acyltransferase delta OS=Mus musculus OX=10090 GN=Agpat4 PE=1 SV=1	[R].DVVPAVYDCTLNFR.[N]	1xCarbamidomethyl [C9]	4.41283e-07	3.46687e-05	1	1	1	3	Q8K4X7 [220-233]	Q8K4X7 1xCarbamidomethyl [C228]	0	1668.81	High	n/a	High		7.935e-06		2.725e-08	3.94
Q9D1E8	1-acyl-sn-glycerol-3-phosphate acyltransferase epsilon OS=Mus musculus OX=10090 GN=Agpat5 PE=1 SV=2	[K].YSNPPSMTEFLCK.[Q]	1xCarbamidomethyl [C12]	3.53461e-06	3.46687e-05	1	1	1	13	Q9D1E8 [242-254]	Q9D1E8 1xCarbamidomethyl [C253]	0	1573.7	High	n/a	High		7.935e-06		2.443e-07	2.87
Q9D1E8	1-acyl-sn-glycerol-3-phosphate acyltransferase epsilon OS=Mus musculus OX=10090 GN=Agpat5 PE=1 SV=2	[K].YSNPPSMTEFLCK.[Q]	1xCarbamidomethyl [C12]; 1xOxidation [M7]	1.23831e-05	3.46687e-05	1	1	1	5	Q9D1E8 [242-254]	Q9D1E8 1xCarbamidomethyl [C253]	0	1589.7	High	n/a	High		7.935e-06		9.205e-07	3.07
Q9D1E8	1-acyl-sn-glycerol-3-phosphate acyltransferase epsilon OS=Mus musculus OX=10090 GN=Agpat5 PE=1 SV=2	[K].YSNPPSMTEFLCKQCPK.[L]	2xCarbamidomethyl [C12; C15]	1.34047e-07	3.46687e-05	1	1	1	1	Q9D1E8 [242-258]	Q9D1E8 2xCarbamidomethyl [C253; C256]	1	2086.94	High	n/a	High		7.935e-06		7.704e-09	3.68
Q9D1E8	1-acyl-sn-glycerol-3-phosphate acyltransferase epsilon OS=Mus musculus OX=10090 GN=Agpat5 PE=1 SV=2	[K].YSNPPSMTEFLCKQCPK.[L]	2xCarbamidomethyl [C12; C15]; 1xOxidation [M7]	8.075e-08	3.46687e-05	1	1	1	2	Q9D1E8 [242-258]	Q9D1E8 2xCarbamidomethyl [C253; C256]	1	2102.93	High	n/a	High		7.935e-06		4.527e-09	2.38
Q9D517	1-acyl-sn-glycerol-3-phosphate acyltransferase gamma OS=Mus musculus OX=10090 GN=Agpat3 PE=1 SV=2	[R].LADYPEYMWFLLYCEGTRFTETK.[H]	1xCarbamidomethyl [C14]; 1xOxidation [M8]	0.0979638	0.0032786	1	1	1	1	Q9D517 [162-184]	Q9D517 1xCarbamidomethyl [C175]	1	2949.35	High	n/a	High		0.0008476		0.01393	2.32
Q9D517	1-acyl-sn-glycerol-3-phosphate acyltransferase gamma OS=Mus musculus OX=10090 GN=Agpat3 PE=1 SV=2	[K].YEADMCVR.[R]	1xCarbamidomethyl [C6]	0.000947783	7.02174e-05	1	1	1	3	Q9D517 [249-256]	Q9D517 1xCarbamidomethyl [C254]	0	1043.43	High	n/a	High		1.496e-05		8.737e-05	0.69
Q9D517	1-acyl-sn-glycerol-3-phosphate acyltransferase gamma OS=Mus musculus OX=10090 GN=Agpat3 PE=1 SV=2	[K].YEADMCVR.[R]	1xCarbamidomethyl [C6]; 1xOxidation [M5]	0.0255354	0.000883695	1	1	1	1	Q9D517 [249-256]	Q9D517 1xCarbamidomethyl [C254]	0	1059.42	High	n/a	High		0.0002541		0.002686	1.97
Q9D517	1-acyl-sn-glycerol-3-phosphate acyltransferase gamma OS=Mus musculus OX=10090 GN=Agpat3 PE=1 SV=2	[K].KYEADMCVR.[R]	1xCarbamidomethyl [C7]	0.00520072	0.000289748	1	1	1	5	Q9D517 [248-256]	Q9D517 1xCarbamidomethyl [C254]	1	1171.52	High	n/a	High		7.049e-05		0.0005007	2.44
Q9D517	1-acyl-sn-glycerol-3-phosphate acyltransferase gamma OS=Mus musculus OX=10090 GN=Agpat3 PE=1 SV=2	[K].KYEADMCVR.[R]	1xCarbamidomethyl [C7]; 1xOxidation [M6]	0.000844453	7.02174e-05	1	1	1	2	Q9D517 [248-256]	Q9D517 1xCarbamidomethyl [C254]	1	1187.52	High	n/a	High		1.496e-05		7.768e-05	1.06
Q9D517	1-acyl-sn-glycerol-3-phosphate acyltransferase gamma OS=Mus musculus OX=10090 GN=Agpat3 PE=1 SV=2	[K].GFTTAVQCLR.[G]	1xCarbamidomethyl [C8]	0.000707023	3.46687e-05	1	1	1	16	Q9D517 [210-219]	Q9D517 1xCarbamidomethyl [C217]	0	1152.58	High	n/a	High		7.935e-06		6.458e-05	3.06
Q9Z1B3	1-phosphatidylinositol 4,5-bisphosphate phosphodiesterase beta-1 OS=Mus musculus OX=10090 GN=Plcb1 PE=1 SV=2	[R].ILPVQAIRPGYHYICLR.[N]	1xCarbamidomethyl [C15]	7.06943e-07	3.46687e-05	1	3	1	2	Q9Z1B3 [761-777]	Q9Z1B3 1xCarbamidomethyl [C775]	0	2069.15	High	n/a	High		7.935e-06		4.455e-08	3.81
Q9Z1B3	1-phosphatidylinositol 4,5-bisphosphate phosphodiesterase beta-1 OS=Mus musculus OX=10090 GN=Plcb1 PE=1 SV=2	[-].MAGAQPGVHALQLKPVCVSDSLKK.[G]	1xCarbamidomethyl [C17]; 1xMet-loss+Acetyl [N-Term]	6.88594e-06	3.46687e-05	1	3	1	1	Q9Z1B3 [1-24]	Q9Z1B3 1xCarbamidomethyl [C17]; 1xMet-loss+Acetyl [N-Term]	1	2445.33	High	n/a	High		0.0002131		7.327e-05	5.63
Q9Z1B3	1-phosphatidylinositol 4,5-bisphosphate phosphodiesterase beta-1 OS=Mus musculus OX=10090 GN=Plcb1 PE=1 SV=2	[-].MAGAQPGVHALQLKPVCVSDSLK.[K]	1xCarbamidomethyl [C17]; 1xMet-loss+Acetyl [N-Term]	5.91086e-10	3.46687e-05	1	3	1	4	Q9Z1B3 [1-23]	Q9Z1B3 1xCarbamidomethyl [C17]; 1xMet-loss+Acetyl [N-Term]	0	2317.23	High	n/a	High		0.0002131		2.535e-07	5.93
Q9Z1B3	1-phosphatidylinositol 4,5-bisphosphate phosphodiesterase beta-1 OS=Mus musculus OX=10090 GN=Plcb1 PE=1 SV=2	[K].LKEICEKEK.[K]	1xCarbamidomethyl [C5]	0.00141316	0.000136771	1	3	1	2	Q9Z1B3 [1057-1065]	Q9Z1B3 1xCarbamidomethyl [C1061]	2	1176.63	High	n/a	High		2.796e-05		0.000132	2.1
Q9Z1B3	1-phosphatidylinositol 4,5-bisphosphate phosphodiesterase beta-1 OS=Mus musculus OX=10090 GN=Plcb1 PE=1 SV=2	[K].LKEICEK.[E]	1xCarbamidomethyl [C5]	0.0298454	0.000991055	1	3	1	4	Q9Z1B3 [1057-1063]	Q9Z1B3 1xCarbamidomethyl [C1061]	1	919.492	High	Low	High	0.1248	0.0002798	0.2696	0.003175	1.67	23
Q9Z1B3	1-phosphatidylinositol 4,5-bisphosphate phosphodiesterase beta-1 OS=Mus musculus OX=10090 GN=Plcb1 PE=1 SV=2	[K].KLKEICEK.[E]	1xCarbamidomethyl [C6]	0.00568179	0.000314522	1	3	1	1	Q9Z1B3 [1056-1063]	Q9Z1B3 1xCarbamidomethyl [C1061]	2	1047.59	High	n/a	High		7.473e-05		0.0005461	1.58
Q9Z1B3	1-phosphatidylinositol 4,5-bisphosphate phosphodiesterase beta-1 OS=Mus musculus OX=10090 GN=Plcb1 PE=1 SV=2	[R].VFLNNLCPRPEIDNIFSEFGAK.[S]	1xCarbamidomethyl [C7]	1.29264e-09	3.46687e-05	1	3	1	8	Q9Z1B3 [214-235]	Q9Z1B3 1xCarbamidomethyl [C220]	0	2580.29	High	n/a	High		7.935e-06		5.76e-11	5.58
Q9Z1B3	1-phosphatidylinositol 4,5-bisphosphate phosphodiesterase beta-1 OS=Mus musculus OX=10090 GN=Plcb1 PE=1 SV=2	[R].QVLLSGCR.[C]	1xCarbamidomethyl [C7]	0.0148566	0.000537414	1	7	1	10	Q9Z1B3 [351-358]	Q9Z1B3 1xCarbamidomethyl [C357]	0	932.498	High	n/a	High		0.000146		0.001497	2.37
Q9Z1B3	1-phosphatidylinositol 4,5-bisphosphate phosphodiesterase beta-1 OS=Mus musculus OX=10090 GN=Plcb1 PE=1 SV=2	[K].LTDVAEECQNNQLK.[K]	1xCarbamidomethyl [C8]	9.9959e-08	3.46687e-05	1	3	1	6	Q9Z1B3 [1042-1055]	Q9Z1B3 1xCarbamidomethyl [C1049]	0	1661.78	High	n/a	High		7.935e-06		5.656e-09	4.22
Q9Z1B3	1-phosphatidylinositol 4,5-bisphosphate phosphodiesterase beta-1 OS=Mus musculus OX=10090 GN=Plcb1 PE=1 SV=2	[R].VETALEACSLPSSR.[N]	1xCarbamidomethyl [C8]	6.35396e-07	3.46687e-05	1	3	1	9	Q9Z1B3 [185-198]	Q9Z1B3 1xCarbamidomethyl [C192]	0	1519.74	High	n/a	High		7.935e-06		3.979e-08	3.24
Q9Z1B3	1-phosphatidylinositol 4,5-bisphosphate phosphodiesterase beta-1 OS=Mus musculus OX=10090 GN=Plcb1 PE=1 SV=2	[K].VVLPSLACLRIAAYEEGGK.[F]	1xCarbamidomethyl [C8]	9.90741e-08	3.46687e-05	1	3	1	6	Q9Z1B3 [737-755]	Q9Z1B3 1xCarbamidomethyl [C744]	1	2046.11	High	n/a	High		7.935e-06		5.634e-09	5.43
Q9Z1B3	1-phosphatidylinositol 4,5-bisphosphate phosphodiesterase beta-1 OS=Mus musculus OX=10090 GN=Plcb1 PE=1 SV=2	[K].VVLPSLACLR.[I]	1xCarbamidomethyl [C8]	0.000376249	3.46687e-05	1	3	1	32	Q9Z1B3 [737-746]	Q9Z1B3 1xCarbamidomethyl [C744]	0	1127.66	High	n/a	High		7.935e-06		3.342e-05	2.18
Q9Z1B3	1-phosphatidylinositol 4,5-bisphosphate phosphodiesterase beta-1 OS=Mus musculus OX=10090 GN=Plcb1 PE=1 SV=2	[K].KVVLPSLACLR.[I]	1xCarbamidomethyl [C9]	0.000556249	3.46687e-05	1	3	1	4	Q9Z1B3 [736-746]	Q9Z1B3 1xCarbamidomethyl [C744]	1	1255.76	High	n/a	High		7.935e-06		5.032e-05	2.84
Q9Z1B3	1-phosphatidylinositol 4,5-bisphosphate phosphodiesterase beta-1 OS=Mus musculus OX=10090 GN=Plcb1 PE=1 SV=2	[K].RVETALEACSLPSSR.[N]	1xCarbamidomethyl [C9]	2.53977e-10	3.46687e-05	1	3	1	2	Q9Z1B3 [184-198]	Q9Z1B3 1xCarbamidomethyl [C192]	1	1675.84	High	n/a	High		7.935e-06		1.041e-11	5.76
Q9Z1B3	1-phosphatidylinositol 4,5-bisphosphate phosphodiesterase beta-1 OS=Mus musculus OX=10090 GN=Plcb1 PE=1 SV=2	[K].EVIEAIAECAFK.[T]	1xCarbamidomethyl [C9]	2.32726e-06	3.46687e-05	1	3	1	8	Q9Z1B3 [390-401]	Q9Z1B3 1xCarbamidomethyl [C398]	0	1379.69	High	n/a	High		7.935e-06		1.569e-07	2.95
Q9Z1B3	1-phosphatidylinositol 4,5-bisphosphate phosphodiesterase beta-1 OS=Mus musculus OX=10090 GN=Plcb1 PE=1 SV=2	[R].QVLLSGCRCVELDCWK.[G]	3xCarbamidomethyl [C7; C9; C14]	3.59927e-05	3.46687e-05	1	7	1	1	Q9Z1B3 [351-366]	Q9Z1B3 3xCarbamidomethyl [C357; C359; C364]	1	2022.96	High	n/a	High		7.935e-06		2.829e-06	2.84
P51432	1-phosphatidylinositol 4,5-bisphosphate phosphodiesterase beta-3 OS=Mus musculus OX=10090 GN=Plcb3 PE=1 SV=2	[K].LCLRPDIDK.[I]	1xCarbamidomethyl [C2]	0.00033819	3.46687e-05	1	1	1	7	P51432 [220-228]	P51432 1xCarbamidomethyl [C221]	0	1129.6	High	n/a	High		7.935e-06		2.99e-05	3.09
P51432	1-phosphatidylinositol 4,5-bisphosphate phosphodiesterase beta-3 OS=Mus musculus OX=10090 GN=Plcb3 PE=1 SV=2	[R].FLNKLCLRPDIDK.[I]	1xCarbamidomethyl [C6]	6.82498e-06	3.46687e-05	1	1	1	2	P51432 [216-228]	P51432 1xCarbamidomethyl [C221]	1	1631.89	High	n/a	High		7.935e-06		4.91e-07	2.69
P51432	1-phosphatidylinositol 4,5-bisphosphate phosphodiesterase beta-3 OS=Mus musculus OX=10090 GN=Plcb3 PE=1 SV=2	[R].SGYHYVCLR.[N]	1xCarbamidomethyl [C7]	0.0222174	0.000779279	1	1	1	1	P51432 [819-827]	P51432 1xCarbamidomethyl [C825]	0	1154.54	High	n/a	High		0.0002193		0.00231	2.02
P51432	1-phosphatidylinositol 4,5-bisphosphate phosphodiesterase beta-3 OS=Mus musculus OX=10090 GN=Plcb3 PE=1 SV=2	[R].VETALESCGLNFNR.[S]	1xCarbamidomethyl [C8]	1.28218e-07	3.46687e-05	1	1	1	2	P51432 [186-199]	P51432 1xCarbamidomethyl [C193]	0	1609.76	High	n/a	High		7.935e-06		7.347e-09	3.97
P51432	1-phosphatidylinositol 4,5-bisphosphate phosphodiesterase beta-3 OS=Mus musculus OX=10090 GN=Plcb3 PE=1 SV=2	[K].LLAQLTQECQEQR.[E]	1xCarbamidomethyl [C9]	2.36901e-06	3.46687e-05	1	1	1	2	P51432 [1168-1180]	P51432 1xCarbamidomethyl [C1176]	0	1616.81	High	n/a	High		7.935e-06		1.607e-07	3.01
Q8R3B1	1-phosphatidylinositol 4,5-bisphosphate phosphodiesterase delta-1 OS=Mus musculus OX=10090 GN=Plcd1 PE=1 SV=2	[K].LVPELSDMVIYCK.[S]	1xCarbamidomethyl [C12]	1.05517e-05	3.46687e-05	1	1	1	5	Q8R3B1 [488-500]	Q8R3B1 1xCarbamidomethyl [C499]	0	1566.79	High	n/a	High		7.935e-06		7.758e-07	2.37
Q8R3B1	1-phosphatidylinositol 4,5-bisphosphate phosphodiesterase delta-1 OS=Mus musculus OX=10090 GN=Plcd1 PE=1 SV=2	[K].LVPELSDMVIYCK.[S]	1xCarbamidomethyl [C12]; 1xOxidation [M8]	4.07638e-05	3.46687e-05	1	1	1	2	Q8R3B1 [488-500]	Q8R3B1 1xCarbamidomethyl [C499]	0	1582.79	High	n/a	High		7.935e-06		3.235e-06	1.87
Q8R3B1	1-phosphatidylinositol 4,5-bisphosphate phosphodiesterase delta-1 OS=Mus musculus OX=10090 GN=Plcd1 PE=1 SV=2	[K].ASPYPVILSLENHCSLEQQR.[V]	1xCarbamidomethyl [C14]	3.95709e-13	3.46687e-05	1	1	1	5	Q8R3B1 [380-399]	Q8R3B1 1xCarbamidomethyl [C393]	0	2341.16	High	n/a	High		7.935e-06		1.134e-14	5.14
Q8R3B1	1-phosphatidylinositol 4,5-bisphosphate phosphodiesterase delta-1 OS=Mus musculus OX=10090 GN=Plcd1 PE=1 SV=2	[K].ILFCDVLR.[A]	1xCarbamidomethyl [C4]	0.00409512	0.000259952	1	1	1	3	Q8R3B1 [364-371]	Q8R3B1 1xCarbamidomethyl [C367]	0	1035.57	High	n/a	High		5.247e-05		0.00039	2.04
Q8R3B1	1-phosphatidylinositol 4,5-bisphosphate phosphodiesterase delta-1 OS=Mus musculus OX=10090 GN=Plcd1 PE=1 SV=2	[K].IFRECDHSQTDSLEDEEIETFYR.[M]	1xCarbamidomethyl [C5]	7.92657e-10	3.46687e-05	1	1	1	1	Q8R3B1 [184-206]	Q8R3B1 1xCarbamidomethyl [C188]	1	2919.27	High	n/a	High		7.935e-06		3.452e-11	5.06
Q8R3B1	1-phosphatidylinositol 4,5-bisphosphate phosphodiesterase delta-1 OS=Mus musculus OX=10090 GN=Plcd1 PE=1 SV=2	[R].DIPEDRCFSIVFKDQR.[N]	1xCarbamidomethyl [C7]	0.00140068	0.000136771	1	1	1	1	Q8R3B1 [90-105]	Q8R3B1 1xCarbamidomethyl [C96]	2	2024.99	High	n/a	High		2.796e-05		0.0001306	3.24
Q8R3B1	1-phosphatidylinositol 4,5-bisphosphate phosphodiesterase delta-1 OS=Mus musculus OX=10090 GN=Plcd1 PE=1 SV=2	[K].LQHWIHSCLR.[K]	1xCarbamidomethyl [C8]	6.47241e-05	3.46687e-05	1	1	1	13	Q8R3B1 [141-150]	Q8R3B1 1xCarbamidomethyl [C148]	0	1349.69	High	n/a	High		7.935e-06		5.266e-06	2.16
Q8K2J0	1-phosphatidylinositol 4,5-bisphosphate phosphodiesterase delta-3 OS=Mus musculus OX=10090 GN=Plcd3 PE=1 SV=2	[R].AFAQGCR.[C]	1xCarbamidomethyl [C6]	0.0273707	0.000883695	1	1	1	4	Q8K2J0 [369-375]	Q8K2J0 1xCarbamidomethyl [C374]	0	809.372	High	n/a	High		0.0002541		0.002903	1.8
Q8K2J0	1-phosphatidylinositol 4,5-bisphosphate phosphodiesterase delta-3 OS=Mus musculus OX=10090 GN=Plcd3 PE=1 SV=2	[R].FGGAFAPACCLTIAFK.[G]	2xCarbamidomethyl [C9; C10]	1.60256e-05	3.46687e-05	1	1	1	2	Q8K2J0 [125-140]	Q8K2J0 2xCarbamidomethyl [C133; C134]	0	1730.84	High	n/a	High		7.935e-06		1.209e-06	3.42
Q62077	1-phosphatidylinositol 4,5-bisphosphate phosphodiesterase gamma-1 OS=Mus musculus OX=10090 GN=Plcg1 PE=1 SV=2	[R].GIVCPFVEIEVAGAEYDSTK.[Q]	1xCarbamidomethyl [C4]	7.92657e-10	3.46687e-05	1	1	1	1	Q62077 [1106-1125]	Q62077 1xCarbamidomethyl [C1109]	0	2184.05	High	n/a	High		7.935e-06		3.436e-11	4.19
Q62077	1-phosphatidylinositol 4,5-bisphosphate phosphodiesterase gamma-1 OS=Mus musculus OX=10090 GN=Plcg1 PE=1 SV=2	[R].GVLDVPACQIAIRPEGK.[N]	1xCarbamidomethyl [C8]	4.90784e-08	3.46687e-05	1	1	1	7	Q62077 [874-890]	Q62077 1xCarbamidomethyl [C881]	0	1822.98	High	n/a	High		7.935e-06		2.671e-09	4.17
Q62077	1-phosphatidylinositol 4,5-bisphosphate phosphodiesterase gamma-1 OS=Mus musculus OX=10090 GN=Plcg1 PE=1 SV=2	[R].GLEPCVICIEVLGAR.[H]	2xCarbamidomethyl [C5; C8]	7.59348e-06	3.46687e-05	1	1	1	1	Q62077 [1084-1098]	Q62077 2xCarbamidomethyl [C1088; C1091]	0	1685.87	High	n/a	High		7.935e-06		5.486e-07	3.66
Q9CR25	2-(3-amino-3-carboxypropyl)histidine synthase subunit 2 OS=Mus musculus OX=10090 GN=Dph2 PE=1 SV=1	[K].FVCDLGCQR.[V]	2xCarbamidomethyl [C3; C7]	0.0191537	0.000702752	1	1	1	1	Q9CR25 [41-49]	Q9CR25 2xCarbamidomethyl [C43; C47]	0	1154.51	High	n/a	High		0.0001999		0.001948	1.03
Q9CQ62	2,4-dienoyl-CoA reductase, mitochondrial OS=Mus musculus OX=10090 GN=Decr1 PE=1 SV=1	[K].AMTTFLSTLGAQCVIASRNIDVLKATAEEISSK.[T]	1xCarbamidomethyl [C13]	0.000400397	3.46687e-05	1	1	1	1	Q9CQ62 [74-106]	Q9CQ62 1xCarbamidomethyl [C86]	2	3525.83	High	n/a	High		0.0002131		0.0008562	4.18
Q9CQ62	2,4-dienoyl-CoA reductase, mitochondrial OS=Mus musculus OX=10090 GN=Decr1 PE=1 SV=1	[K].AMTTFLSTLGAQCVIASRNIDVLK.[A]	1xCarbamidomethyl [C13]	9.22005e-10	3.46687e-05	1	1	1	2	Q9CQ62 [74-97]	Q9CQ62 1xCarbamidomethyl [C86]	1	2609.38	High	n/a	High		7.935e-06		4.034e-11	3.93
Q9CQ62	2,4-dienoyl-CoA reductase, mitochondrial OS=Mus musculus OX=10090 GN=Decr1 PE=1 SV=1	[K].AMTTFLSTLGAQCVIASR.[N]	1xCarbamidomethyl [C13]	2.38834e-08	3.46687e-05	1	1	1	11	Q9CQ62 [74-91]	Q9CQ62 1xCarbamidomethyl [C86]	0	1926.98	High	n/a	High		7.935e-06		1.25e-09	3.72
Q9CQ62	2,4-dienoyl-CoA reductase, mitochondrial OS=Mus musculus OX=10090 GN=Decr1 PE=1 SV=1	[K].AMTTFLSTLGAQCVIASRNIDVLK.[A]	1xCarbamidomethyl [C13]; 1xOxidation [M2]	0.000288193	3.46687e-05	1	1	1	2	Q9CQ62 [74-97]	Q9CQ62 1xCarbamidomethyl [C86]	1	2625.37	High	n/a	High		7.935e-06		2.536e-05	1.75
Q9CQ62	2,4-dienoyl-CoA reductase, mitochondrial OS=Mus musculus OX=10090 GN=Decr1 PE=1 SV=1	[K].AMTTFLSTLGAQCVIASR.[N]	1xCarbamidomethyl [C13]; 1xOxidation [M2]	1.1409e-10	3.46687e-05	1	1	1	17	Q9CQ62 [74-91]	Q9CQ62 1xCarbamidomethyl [C86]	0	1942.97	High	n/a	High		7.935e-06		4.48e-12	4.07
Q9CQ62	2,4-dienoyl-CoA reductase, mitochondrial OS=Mus musculus OX=10090 GN=Decr1 PE=1 SV=1	[K].AMTTFLSTLGAQCVIASRNIDVLKATAEEISSK.[T]	1xCarbamidomethyl [C13]; 1xOxidation [M2]	0.000759088	7.02174e-05	1	1	1	1	Q9CQ62 [74-106]	Q9CQ62 1xCarbamidomethyl [C86]	2	3541.82	High	n/a	High		0.0002131		0.001262	2.85
Q9CQ62	2,4-dienoyl-CoA reductase, mitochondrial OS=Mus musculus OX=10090 GN=Decr1 PE=1 SV=1	[K].VHAIRCDVRDPDMVHNTVLELIK.[V]	1xCarbamidomethyl [C6]	0.0137275	0.000508083	1	1	1	2	Q9CQ62 [111-133]	Q9CQ62 1xCarbamidomethyl [C116]	2	2730.42	High	n/a	High		0.0001348		0.001376	2.58
Q9CQ62	2,4-dienoyl-CoA reductase, mitochondrial OS=Mus musculus OX=10090 GN=Decr1 PE=1 SV=1	[K].VHAIRCDVRDPDMVHNTVLELIK.[V]	1xCarbamidomethyl [C6]; 1xOxidation [M13]	2.70798e-05	3.46687e-05	1	1	1	2	Q9CQ62 [111-133]	Q9CQ62 1xCarbamidomethyl [C116]	2	2746.41	High	n/a	High		7.935e-06		2.1e-06	3.5
Q3TIU4	2',5'-phosphodiesterase 12 OS=Mus musculus OX=10090 GN=Pde12 PE=1 SV=2	[K].ELTGYNADLICLQEVDR.[A]	1xCarbamidomethyl [C11]	0.000170577	3.46687e-05	1	1	1	1	Q3TIU4 [337-353]	Q3TIU4 1xCarbamidomethyl [C347]	0	2008.96	High	n/a	High		7.935e-06		1.458e-05	1.71
Q3TIU4	2',5'-phosphodiesterase 12 OS=Mus musculus OX=10090 GN=Pde12 PE=1 SV=2	[R].VYTPCNADIGLR.[L]	1xCarbamidomethyl [C5]	2.85638e-05	3.46687e-05	1	1	1	3	Q3TIU4 [233-244]	Q3TIU4 1xCarbamidomethyl [C237]	0	1378.68	High	n/a	High		7.935e-06		2.216e-06	3.39
Q3TIU4	2',5'-phosphodiesterase 12 OS=Mus musculus OX=10090 GN=Pde12 PE=1 SV=2	[R].AVVRCVPSEPK.[L]	1xCarbamidomethyl [C5]	0.00384896	0.000259952	1	1	1	1	Q3TIU4 [37-47]	Q3TIU4 1xCarbamidomethyl [C41]	1	1241.67	High	n/a	High		5.247e-05		0.0003681	2.1
Q3TIU4	2',5'-phosphodiesterase 12 OS=Mus musculus OX=10090 GN=Pde12 PE=1 SV=2	[R].YIMAGFPVCPK.[L]	1xCarbamidomethyl [C9]	0.00033819	3.46687e-05	1	1	1	2	Q3TIU4 [171-181]	Q3TIU4 1xCarbamidomethyl [C179]	0	1282.63	High	n/a	High		7.935e-06		2.995e-05	2.8
P11928	2'-5'-oligoadenylate synthase 1A OS=Mus musculus OX=10090 GN=Oas1a PE=1 SV=2	[K].SAVNVVCDFLK.[E]	1xCarbamidomethyl [C7]	8.83506e-05	3.46687e-05	1	1	1	1	P11928 [33-43]	P11928 1xCarbamidomethyl [C39]	0	1251.64	High	n/a	High		7.935e-06		7.317e-06	2.82
Q3TXS7	26S proteasome non-ATPase regulatory subunit 1 OS=Mus musculus OX=10090 GN=Psmd1 PE=1 SV=1	[K].CIDHYTK.[Q]	1xCarbamidomethyl [C1]	0.00103578	7.02174e-05	1	1	1	2	Q3TXS7 [104-110]	Q3TXS7 1xCarbamidomethyl [C104]	0	936.424	High	n/a	High		1.496e-05		9.626e-05	1.57
Q3TXS7	26S proteasome non-ATPase regulatory subunit 1 OS=Mus musculus OX=10090 GN=Psmd1 PE=1 SV=1	[R].MEEADALIESLCR.[D]	1xCarbamidomethyl [C12]	8.44534e-07	3.46687e-05	1	1	1	5	Q3TXS7 [560-572]	Q3TXS7 1xCarbamidomethyl [C571]	0	1536.7	High	n/a	High		7.935e-06		5.395e-08	4.2
Q3TXS7	26S proteasome non-ATPase regulatory subunit 1 OS=Mus musculus OX=10090 GN=Psmd1 PE=1 SV=1	[R].LEGIVNKMFQRCLDDHK.[Y]	1xCarbamidomethyl [C12]	2.11117e-05	3.46687e-05	1	1	1	1	Q3TXS7 [130-146]	Q3TXS7 1xCarbamidomethyl [C141]	2	2103.05	High	n/a	High		7.935e-06		1.611e-06	2.89
Q3TXS7	26S proteasome non-ATPase regulatory subunit 1 OS=Mus musculus OX=10090 GN=Psmd1 PE=1 SV=1	[R].MEEADALIESLCR.[D]	1xCarbamidomethyl [C12]; 1xOxidation [M1]	2.45291e-08	3.46687e-05	1	1	1	7	Q3TXS7 [560-572]	Q3TXS7 1xCarbamidomethyl [C571]	0	1552.7	High	n/a	High		7.935e-06		1.291e-09	2.98
Q3TXS7	26S proteasome non-ATPase regulatory subunit 1 OS=Mus musculus OX=10090 GN=Psmd1 PE=1 SV=1	[R].MEEADALIESLCRDKDPILR.[R]	1xCarbamidomethyl [C12]; 1xOxidation [M1]	0.0295885	0.000991055	1	1	1	1	Q3TXS7 [560-579]	Q3TXS7 1xCarbamidomethyl [C571]	2	2390.17	High	n/a	High		0.0002798		0.003165	1.67
Q3TXS7	26S proteasome non-ATPase regulatory subunit 1 OS=Mus musculus OX=10090 GN=Psmd1 PE=1 SV=1	[R].QGALIASALIMIQQTEITCPK.[V]	1xCarbamidomethyl [C19]	2.77701e-09	3.46687e-05	1	1	1	5	Q3TXS7 [685-705]	Q3TXS7 1xCarbamidomethyl [C703]	0	2286.22	High	n/a	High		7.935e-06		1.292e-10	4.82
Q3TXS7	26S proteasome non-ATPase regulatory subunit 1 OS=Mus musculus OX=10090 GN=Psmd1 PE=1 SV=1	[K].QCVENADLPEGEK.[K]	1xCarbamidomethyl [C2]	5.22701e-06	3.46687e-05	1	1	1	2	Q3TXS7 [111-123]	Q3TXS7 1xCarbamidomethyl [C112]	0	1488.66	High	n/a	High		7.935e-06		3.698e-07	3.91
Q3TXS7	26S proteasome non-ATPase regulatory subunit 1 OS=Mus musculus OX=10090 GN=Psmd1 PE=1 SV=1	[K].LCMSLMQNK.[Q]	1xCarbamidomethyl [C2]	0.00140068	0.000136771	1	1	1	3	Q3TXS7 [183-191]	Q3TXS7 1xCarbamidomethyl [C184]	0	1124.53	High	n/a	High		2.796e-05		0.0001304	3.07
Q3TXS7	26S proteasome non-ATPase regulatory subunit 1 OS=Mus musculus OX=10090 GN=Psmd1 PE=1 SV=1	[K].LCMSLMQNK.[Q]	1xCarbamidomethyl [C2]; 1xOxidation [M3]	0.0138487	0.000508083	1	1	1	3	Q3TXS7 [183-191]	Q3TXS7 1xCarbamidomethyl [C184]	0	1140.52	High	n/a	High		0.0001348		0.00138	1.68
Q3TXS7	26S proteasome non-ATPase regulatory subunit 1 OS=Mus musculus OX=10090 GN=Psmd1 PE=1 SV=1	[R].TPEQCPSVVSLLSESYNPHVR.[Y]	1xCarbamidomethyl [C5]	2.82467e-11	3.46687e-05	1	1	1	3	Q3TXS7 [629-649]	Q3TXS7 1xCarbamidomethyl [C633]	0	2399.17	High	n/a	High		7.935e-06		1.026e-12	6.44
Q3TXS7	26S proteasome non-ATPase regulatory subunit 1 OS=Mus musculus OX=10090 GN=Psmd1 PE=1 SV=1	[K].VQYKSNCKPSTFAYPAPLEVPK.[E]	1xCarbamidomethyl [C7]	0.0226079	0.000779279	1	1	1	1	Q3TXS7 [800-821]	Q3TXS7 1xCarbamidomethyl [C806]	1	2524.29	High	n/a	High		0.0002193		0.002339	1.26
Q3TXS7	26S proteasome non-ATPase regulatory subunit 1 OS=Mus musculus OX=10090 GN=Psmd1 PE=1 SV=1	[K].VLSMTETCR.[Y]	1xCarbamidomethyl [C8]	0.000947783	7.02174e-05	1	1	1	7	Q3TXS7 [891-899]	Q3TXS7 1xCarbamidomethyl [C898]	0	1096.51	High	n/a	High		1.496e-05		8.714e-05	2.64
Q3TXS7	26S proteasome non-ATPase regulatory subunit 1 OS=Mus musculus OX=10090 GN=Psmd1 PE=1 SV=1	[K].VLSMTETCR.[Y]	1xCarbamidomethyl [C8]; 1xOxidation [M4]	0.000353556	3.46687e-05	1	1	1	6	Q3TXS7 [891-899]	Q3TXS7 1xCarbamidomethyl [C898]	0	1112.51	High	n/a	High		7.935e-06		3.134e-05	1.36
Q3TXS7	26S proteasome non-ATPase regulatory subunit 1 OS=Mus musculus OX=10090 GN=Psmd1 PE=1 SV=1	[R].YGAAMALGICCAGTGNK.[E]	2xCarbamidomethyl [C10; C11]	2.61044e-08	3.46687e-05	1	1	1	11	Q3TXS7 [650-666]	Q3TXS7 2xCarbamidomethyl [C659; C660]	0	1714.77	High	n/a	High		7.935e-06		1.377e-09	4.11
Q3TXS7	26S proteasome non-ATPase regulatory subunit 1 OS=Mus musculus OX=10090 GN=Psmd1 PE=1 SV=1	[R].YGAAMALGICCAGTGNK.[E]	2xCarbamidomethyl [C10; C11]; 1xOxidation [M5]	9.30597e-09	3.46687e-05	1	1	1	4	Q3TXS7 [650-666]	Q3TXS7 2xCarbamidomethyl [C659; C660]	0	1730.77	High	n/a	High		7.935e-06		4.617e-10	3.8
Q3TXS7	26S proteasome non-ATPase regulatory subunit 1 OS=Mus musculus OX=10090 GN=Psmd1 PE=1 SV=1	[R].NSVCHTATVIANSFMHCGTTSDQFLR.[D]	2xCarbamidomethyl [C4; C17]	2.49117e-14	3.46687e-05	1	1	1	6	Q3TXS7 [362-387]	Q3TXS7 2xCarbamidomethyl [C365; C378]	0	2954.33	High	n/a	High		7.935e-06		6.143e-16	5.9
Q3TXS7	26S proteasome non-ATPase regulatory subunit 1 OS=Mus musculus OX=10090 GN=Psmd1 PE=1 SV=1	[R].NSVCHTATVIANSFMHCGTTSDQFLR.[D]	2xCarbamidomethyl [C4; C17]; 1xOxidation [M15]	5.50501e-10	3.46687e-05	1	1	1	5	Q3TXS7 [362-387]	Q3TXS7 2xCarbamidomethyl [C365; C378]	0	2970.33	High	n/a	High		7.935e-06		2.345e-11	4.21
Q3TXS7	26S proteasome non-ATPase regulatory subunit 1 OS=Mus musculus OX=10090 GN=Psmd1 PE=1 SV=1	[K].DAVRNSVCHTATVIANSFMHCGTTSDQFLR.[D]	2xCarbamidomethyl [C8; C21]	2.72806e-09	3.46687e-05	1	1	1	2	Q3TXS7 [358-387]	Q3TXS7 2xCarbamidomethyl [C365; C378]	1	3395.57	High	n/a	High		7.935e-06		1.27e-10	7.71
Q3TXS7	26S proteasome non-ATPase regulatory subunit 1 OS=Mus musculus OX=10090 GN=Psmd1 PE=1 SV=1	[K].DAVRNSVCHTATVIANSFMHCGTTSDQFLR.[D]	2xCarbamidomethyl [C8; C21]; 1xOxidation [M19]	1.92938e-08	3.46687e-05	1	1	1	1	Q3TXS7 [358-387]	Q3TXS7 2xCarbamidomethyl [C365; C378]	1	3411.56	High	n/a	High		7.935e-06		1.004e-09	5.37
Q8BG32	26S proteasome non-ATPase regulatory subunit 11 OS=Mus musculus OX=10090 GN=Psmd11 PE=1 SV=3	[R].QTEALKCVAQASK.[N]	1xCarbamidomethyl [C7]	1.73544e-06	3.46687e-05	1	1	1	3	Q8BG32 [283-295]	Q8BG32 1xCarbamidomethyl [C289]	1	1433.74	High	n/a	High		7.935e-06		1.156e-07	3.85
Q8BG32	26S proteasome non-ATPase regulatory subunit 11 OS=Mus musculus OX=10090 GN=Psmd11 PE=1 SV=3	[R].TTANAIYCPPKLQATLDMQSGIIHAAEEK.[D]	1xCarbamidomethyl [C8]	4.14951e-05	3.46687e-05	1	1	1	1	Q8BG32 [195-223]	Q8BG32 1xCarbamidomethyl [C202]	1	3171.58	High	n/a	High		7.935e-06		3.295e-06	2.95
Q8BG32	26S proteasome non-ATPase regulatory subunit 11 OS=Mus musculus OX=10090 GN=Psmd11 PE=1 SV=3	[R].TTANAIYCPPK.[L]	1xCarbamidomethyl [C8]	0.000581515	3.46687e-05	1	1	1	14	Q8BG32 [195-205]	Q8BG32 1xCarbamidomethyl [C202]	0	1235.61	High	n/a	High		7.935e-06		5.255e-05	2.02
Q9D8W5	26S proteasome non-ATPase regulatory subunit 12 OS=Mus musculus OX=10090 GN=Psmd12 PE=1 SV=4	[R].LPECEKLAK.[E]	1xCarbamidomethyl [C4]	0.000607927	3.46687e-05	1	1	1	3	Q9D8W5 [28-36]	Q9D8W5 1xCarbamidomethyl [C31]	1	1087.58	High	n/a	High		7.935e-06		5.542e-05	2.71
Q9D8W5	26S proteasome non-ATPase regulatory subunit 12 OS=Mus musculus OX=10090 GN=Psmd12 PE=1 SV=4	[R].AIYDTPCIQAESDK.[W]	1xCarbamidomethyl [C7]	5.50924e-08	3.46687e-05	1	1	1	1	Q9D8W5 [249-262]	Q9D8W5 1xCarbamidomethyl [C255]	0	1610.74	High	n/a	High		7.935e-06		3.034e-09	2.63
Q9D8W5	26S proteasome non-ATPase regulatory subunit 12 OS=Mus musculus OX=10090 GN=Psmd12 PE=1 SV=4	[K].MVQQCCTYVEEITDLPVK.[L]	2xCarbamidomethyl [C5; C6]	3.40718e-09	3.46687e-05	1	1	1	1	Q9D8W5 [104-121]	Q9D8W5 2xCarbamidomethyl [C108; C109]	0	2213.03	High	n/a	High		7.935e-06		1.609e-10	3.67
Q9D8W5	26S proteasome non-ATPase regulatory subunit 12 OS=Mus musculus OX=10090 GN=Psmd12 PE=1 SV=4	[K].MVQQCCTYVEEITDLPVK.[L]	2xCarbamidomethyl [C5; C6]; 1xOxidation [M1]	9.64292e-09	3.46687e-05	1	1	1	4	Q9D8W5 [104-121]	Q9D8W5 2xCarbamidomethyl [C108; C109]	0	2229.02	High	n/a	High		7.935e-06		4.796e-10	3.14
Q9WVJ2	26S proteasome non-ATPase regulatory subunit 13 OS=Mus musculus OX=10090 GN=Psmd13 PE=1 SV=1	[K].CAWGQQPDLAANEAQLLR.[K]	1xCarbamidomethyl [C1]	4.69081e-10	3.46687e-05	1	1	1	1	Q9WVJ2 [253-270]	Q9WVJ2 1xCarbamidomethyl [C253]	0	2040.99	High	n/a	High		7.935e-06		1.979e-11	4.74
Q9WVJ2	26S proteasome non-ATPase regulatory subunit 13 OS=Mus musculus OX=10090 GN=Psmd13 PE=1 SV=1	[R].FLGCVDIK.[D]	1xCarbamidomethyl [C4]	0.00424277	0.000259952	1	1	1	11	Q9WVJ2 [179-186]	Q9WVJ2 1xCarbamidomethyl [C182]	0	951.497	High	n/a	High		5.247e-05		0.0004075	1.73
Q9WVJ2	26S proteasome non-ATPase regulatory subunit 13 OS=Mus musculus OX=10090 GN=Psmd13 PE=1 SV=1	[R].LELWCTDVK.[S]	1xCarbamidomethyl [C5]	0.000196649	3.46687e-05	1	1	1	8	Q9WVJ2 [353-361]	Q9WVJ2 1xCarbamidomethyl [C357]	0	1163.58	High	n/a	High		7.935e-06		1.692e-05	2.02
Q9WVJ2	26S proteasome non-ATPase regulatory subunit 13 OS=Mus musculus OX=10090 GN=Psmd13 PE=1 SV=1	[K].IQLLCLMEMTFTRPANHR.[Q]	1xCarbamidomethyl [C5]; 1xOxidation [M7]	1.73478e-07	3.46687e-05	1	1	1	2	Q9WVJ2 [272-289]	Q9WVJ2 1xCarbamidomethyl [C276]	0	2247.12	High	n/a	High		7.935e-06		1.014e-08	2.66
Q9WVJ2	26S proteasome non-ATPase regulatory subunit 13 OS=Mus musculus OX=10090 GN=Psmd13 PE=1 SV=1	[K].IQLLCLMEMTFTRPANHR.[Q]	1xCarbamidomethyl [C5]; 2xOxidation [M7; M9]	3.76289e-05	3.46687e-05	1	1	1	1	Q9WVJ2 [272-289]	Q9WVJ2 1xCarbamidomethyl [C276]	0	2263.11	High	n/a	High		7.935e-06		2.966e-06	2.57
Q9WVJ2	26S proteasome non-ATPase regulatory subunit 13 OS=Mus musculus OX=10090 GN=Psmd13 PE=1 SV=1	[R].KIQLLCLMEMTFTRPANHR.[Q]	1xCarbamidomethyl [C6]; 2xOxidation [M8; M10]	2.85428e-07	3.46687e-05	1	1	1	3	Q9WVJ2 [271-289]	Q9WVJ2 1xCarbamidomethyl [C276]	1	2391.21	High	n/a	High		7.935e-06		1.717e-08	3.66
Q9WVJ2	26S proteasome non-ATPase regulatory subunit 13 OS=Mus musculus OX=10090 GN=Psmd13 PE=1 SV=1	[K].DRLELWCTDVK.[S]	1xCarbamidomethyl [C7]	9.23667e-05	3.46687e-05	1	1	1	8	Q9WVJ2 [351-361]	Q9WVJ2 1xCarbamidomethyl [C357]	1	1434.7	High	n/a	High		7.935e-06		7.627e-06	3.98
Q9WVJ2	26S proteasome non-ATPase regulatory subunit 13 OS=Mus musculus OX=10090 GN=Psmd13 PE=1 SV=1	[K].DALRFLGCVDIKDLPVSEQQER.[A]	1xCarbamidomethyl [C8]	1.15197e-08	3.46687e-05	1	1	1	2	Q9WVJ2 [175-196]	Q9WVJ2 1xCarbamidomethyl [C182]	2	2588.31	High	n/a	High		7.935e-06		5.813e-10	5.62
Q9WVJ2	26S proteasome non-ATPase regulatory subunit 13 OS=Mus musculus OX=10090 GN=Psmd13 PE=1 SV=1	[K].SSDEAVILCKTAIGALK.[L]	1xCarbamidomethyl [C9]	2.28273e-10	3.46687e-05	1	1	1	1	Q9WVJ2 [106-122]	Q9WVJ2 1xCarbamidomethyl [C114]	1	1775.96	High	n/a	High		7.935e-06		9.281e-12	4.55
Q9WVJ2	26S proteasome non-ATPase regulatory subunit 13 OS=Mus musculus OX=10090 GN=Psmd13 PE=1 SV=1	[K].SSDEAVILCK.[T]	1xCarbamidomethyl [C9]	5.46639e-05	3.46687e-05	1	1	1	4	Q9WVJ2 [106-115]	Q9WVJ2 1xCarbamidomethyl [C114]	0	1121.55	High	n/a	High		7.935e-06		4.382e-06	2.32
Q9WVJ2	26S proteasome non-ATPase regulatory subunit 13 OS=Mus musculus OX=10090 GN=Psmd13 PE=1 SV=1	[K].SSDEAVILCKTAIGALKLNIGDLQATK.[E]	1xCarbamidomethyl [C9]	3.19789e-12	3.46687e-05	1	1	1	4	Q9WVJ2 [106-132]	Q9WVJ2 1xCarbamidomethyl [C114]	2	2829.54	High	n/a	High		7.935e-06		1.028e-13	5.15
O35593	26S proteasome non-ATPase regulatory subunit 14 OS=Mus musculus OX=10090 GN=Psmd14 PE=1 SV=2	[K].SWMEGLTLQDYSEHCK.[H]	1xCarbamidomethyl [C15]	1.75027e-07	3.46687e-05	1	1	1	4	O35593 [224-239]	O35593 1xCarbamidomethyl [C238]	0	1983.86	High	n/a	High		7.935e-06		1.021e-08	4.01
O35593	26S proteasome non-ATPase regulatory subunit 14 OS=Mus musculus OX=10090 GN=Psmd14 PE=1 SV=2	[K].SWMEGLTLQDYSEHCK.[H]	1xCarbamidomethyl [C15]; 1xOxidation [M3]	3.37962e-07	3.46687e-05	1	1	1	2	O35593 [224-239]	O35593 1xCarbamidomethyl [C238]	0	1999.85	High	n/a	High		7.935e-06		2.048e-08	3.72
Q8VDM4	26S proteasome non-ATPase regulatory subunit 2 OS=Mus musculus OX=10090 GN=Psmd2 PE=1 SV=1	[R].SFANTLVDVCAYAGSGNVLK.[V]	1xCarbamidomethyl [C10]	3.46699e-10	3.46687e-05	1	1	1	9	Q8VDM4 [589-608]	Q8VDM4 1xCarbamidomethyl [C598]	0	2086.03	High	n/a	High		7.935e-06		1.437e-11	3.91
Q8VDM4	26S proteasome non-ATPase regulatory subunit 2 OS=Mus musculus OX=10090 GN=Psmd2 PE=1 SV=1	[R].LALMLNDMELVEDIFTSCK.[D]	1xCarbamidomethyl [C18]	3.46965e-08	3.46687e-05	1	1	1	3	Q8VDM4 [268-286]	Q8VDM4 1xCarbamidomethyl [C285]	0	2242.08	High	n/a	High		7.935e-06		1.851e-09	4.67
Q8VDM4	26S proteasome non-ATPase regulatory subunit 2 OS=Mus musculus OX=10090 GN=Psmd2 PE=1 SV=1	[R].LALMLNDMELVEDIFTSCK.[D]	1xCarbamidomethyl [C18]; 1xOxidation [M]	5.96595e-09	3.46687e-05	1	1	2	5	Q8VDM4 [268-286]	Q8VDM4 1xCarbamidomethyl [C285]	0	2258.08	High	n/a	High		7.935e-06		2.912e-10	5.19
Q8VDM4	26S proteasome non-ATPase regulatory subunit 2 OS=Mus musculus OX=10090 GN=Psmd2 PE=1 SV=1	[R].LALMLNDMELVEDIFTSCK.[D]	1xCarbamidomethyl [C18]; 2xOxidation [M4; M8]	2.01709e-08	3.46687e-05	1	1	1	1	Q8VDM4 [268-286]	Q8VDM4 1xCarbamidomethyl [C285]	0	2274.07	High	n/a	High		7.935e-06		1.05e-09	4.75
Q8VDM4	26S proteasome non-ATPase regulatory subunit 2 OS=Mus musculus OX=10090 GN=Psmd2 PE=1 SV=1	[K].GTLTLCPYHSDR.[Q]	1xCarbamidomethyl [C6]	2.01937e-05	3.46687e-05	1	1	1	5	Q8VDM4 [774-785]	Q8VDM4 1xCarbamidomethyl [C779]	0	1419.67	High	n/a	High		7.935e-06		1.538e-06	3.1
Q8VDM4	26S proteasome non-ATPase regulatory subunit 2 OS=Mus musculus OX=10090 GN=Psmd2 PE=1 SV=1	[K].SGALLACGIVNSGVR.[N]	1xCarbamidomethyl [C7]	5.97053e-07	3.46687e-05	1	1	1	38	Q8VDM4 [442-456]	Q8VDM4 1xCarbamidomethyl [C448]	0	1473.78	High	n/a	High		7.935e-06		3.75e-08	3.43
Q8VDM4	26S proteasome non-ATPase regulatory subunit 2 OS=Mus musculus OX=10090 GN=Psmd2 PE=1 SV=1	[K].VQQLLHICSEHFDSK.[E]	1xCarbamidomethyl [C8]	7.19351e-08	3.46687e-05	1	1	1	19	Q8VDM4 [609-623]	Q8VDM4 1xCarbamidomethyl [C616]	0	1840.9	High	n/a	High		7.935e-06		3.999e-09	4.24
Q8VDM4	26S proteasome non-ATPase regulatory subunit 2 OS=Mus musculus OX=10090 GN=Psmd2 PE=1 SV=1	[K].VCLYLTSCVNYVPEPENSALLR.[C]	2xCarbamidomethyl [C2; C8]	3.17689e-06	3.46687e-05	1	1	1	1	Q8VDM4 [229-250]	Q8VDM4 2xCarbamidomethyl [C230; C236]	0	2597.27	High	n/a	High		7.935e-06		2.186e-07	2.56
P14685	26S proteasome non-ATPase regulatory subunit 3 OS=Mus musculus OX=10090 GN=Psmd3 PE=1 SV=3	[R].ISFCLDIHNMSVK.[A]	1xCarbamidomethyl [C4]	1.03578e-07	3.46687e-05	1	1	1	4	P14685 [476-488]	P14685 1xCarbamidomethyl [C479]	0	1563.77	High	n/a	High		7.935e-06		5.92e-09	3.91
P14685	26S proteasome non-ATPase regulatory subunit 3 OS=Mus musculus OX=10090 GN=Psmd3 PE=1 SV=3	[R].ISFCLDIHNMSVK.[A]	1xCarbamidomethyl [C4]; 1xOxidation [M10]	1.58719e-07	3.46687e-05	1	1	1	6	P14685 [476-488]	P14685 1xCarbamidomethyl [C479]	0	1579.76	High	n/a	High		7.935e-06		9.239e-09	3.31
P14685	26S proteasome non-ATPase regulatory subunit 3 OS=Mus musculus OX=10090 GN=Psmd3 PE=1 SV=3	[R].ALDLVAAKCYYYHAR.[V]	1xCarbamidomethyl [C9]	1.30518e-07	3.46687e-05	1	1	1	6	P14685 [198-212]	P14685 1xCarbamidomethyl [C206]	1	1813.91	High	n/a	High		7.935e-06		7.522e-09	4.49
O35226	26S proteasome non-ATPase regulatory subunit 4 OS=Mus musculus OX=10090 GN=Psmd4 PE=1 SV=1	[R].LQAQQDAVNIVCHSKTR.[S]	1xCarbamidomethyl [C12]	4.73816e-07	3.46687e-05	1	5	1	2	O35226 [26-42]	O35226 1xCarbamidomethyl [C37]	1	1968.01	High	n/a	High		7.935e-06		2.94e-08	4.43
O35226	26S proteasome non-ATPase regulatory subunit 4 OS=Mus musculus OX=10090 GN=Psmd4 PE=1 SV=1	[R].LQAQQDAVNIVCHSK.[T]	1xCarbamidomethyl [C12]	3.26153e-07	3.46687e-05	1	5	1	8	O35226 [26-40]	O35226 1xCarbamidomethyl [C37]	0	1710.86	High	n/a	High		7.935e-06		1.968e-08	3.32
O35226	26S proteasome non-ATPase regulatory subunit 4 OS=Mus musculus OX=10090 GN=Psmd4 PE=1 SV=1	[R].SNPENNVGLITLANDCEVLTTLTPDTGR.[I]	1xCarbamidomethyl [C16]	3.37443e-11	3.46687e-05	1	5	1	2	O35226 [43-70]	O35226 1xCarbamidomethyl [C58]	0	3014.47	High	n/a	High		7.935e-06		1.233e-12	6.51
O35226	26S proteasome non-ATPase regulatory subunit 4 OS=Mus musculus OX=10090 GN=Psmd4 PE=1 SV=1	[K].ITFCTGIR.[V]	1xCarbamidomethyl [C4]	0.118328	0.004008	1	5	1	2	O35226 [84-91]	O35226 1xCarbamidomethyl [C87]	0	967.503	High	n/a	High		0.0009966		0.01805	2.53
O35226	26S proteasome non-ATPase regulatory subunit 4 OS=Mus musculus OX=10090 GN=Psmd4 PE=1 SV=1	[-].MVLESTMVCVDNSEYMR.[N]	1xCarbamidomethyl [C9]; 1xMet-loss [N-Term]	9.48634e-05	3.46687e-05	1	5	1	1	O35226 [1-17]	O35226 1xCarbamidomethyl [C9]; 1xMet-loss [N-Term]	0	1932.85	High	n/a	High		0.0002131		0.0003586	3.49
Q8BJY1	26S proteasome non-ATPase regulatory subunit 5 OS=Mus musculus OX=10090 GN=Psmd5 PE=1 SV=4	[R].GISNQPFPELHCAALK.[V]	1xCarbamidomethyl [C12]	9.99206e-09	3.46687e-05	1	1	1	9	Q8BJY1 [401-416]	Q8BJY1 1xCarbamidomethyl [C412]	0	1781.9	High	n/a	High		7.935e-06		5.02e-10	4.39
Q8BJY1	26S proteasome non-ATPase regulatory subunit 5 OS=Mus musculus OX=10090 GN=Psmd5 PE=1 SV=4	[K].FFGNLAVMDSPQQICER.[Y]	1xCarbamidomethyl [C15]	5.22302e-08	3.46687e-05	1	1	1	10	Q8BJY1 [276-292]	Q8BJY1 1xCarbamidomethyl [C290]	0	2011.94	High	n/a	High		7.935e-06		2.863e-09	3.36
Q8BJY1	26S proteasome non-ATPase regulatory subunit 5 OS=Mus musculus OX=10090 GN=Psmd5 PE=1 SV=4	[K].FFGNLAVMDSPQQICER.[Y]	1xCarbamidomethyl [C15]; 1xOxidation [M8]	3.4098e-07	3.46687e-05	1	1	1	2	Q8BJY1 [276-292]	Q8BJY1 1xCarbamidomethyl [C290]	0	2027.93	High	n/a	High		7.935e-06		2.062e-08	3.27
Q8BJY1	26S proteasome non-ATPase regulatory subunit 5 OS=Mus musculus OX=10090 GN=Psmd5 PE=1 SV=4	[R].ATCIEMVTSLAYTHHGR.[Q]	1xCarbamidomethyl [C3]; 1xOxidation [M6]	0.0389668	0.00116639	1	1	1	1	Q8BJY1 [225-241]	Q8BJY1 1xCarbamidomethyl [C227]	0	1962.92	High	n/a	High		0.0003374		0.004346	1.77
Q8BJY1	26S proteasome non-ATPase regulatory subunit 5 OS=Mus musculus OX=10090 GN=Psmd5 PE=1 SV=4	[K].QIVYCIGGENLSVAK.[A]	1xCarbamidomethyl [C5]	6.94482e-07	3.46687e-05	1	1	1	3	Q8BJY1 [129-143]	Q8BJY1 1xCarbamidomethyl [C133]	0	1650.85	High	n/a	High		7.935e-06		4.386e-08	3.23
Q8BJY1	26S proteasome non-ATPase regulatory subunit 5 OS=Mus musculus OX=10090 GN=Psmd5 PE=1 SV=4	[R].EQTALCVSILER.[L]	1xCarbamidomethyl [C6]	6.41313e-06	3.46687e-05	1	1	1	6	Q8BJY1 [59-70]	Q8BJY1 1xCarbamidomethyl [C64]	0	1418.73	High	n/a	High		7.935e-06		4.579e-07	2.55
Q99JI4	26S proteasome non-ATPase regulatory subunit 6 OS=Mus musculus OX=10090 GN=Psmd6 PE=1 SV=1	[R].ENNMAPYYEALCK.[S]	1xCarbamidomethyl [C12]	5.91992e-06	3.46687e-05	1	1	1	3	Q99JI4 [47-59]	Q99JI4 1xCarbamidomethyl [C58]	0	1602.69	High	n/a	High		7.935e-06		4.223e-07	3.02
Q99JI4	26S proteasome non-ATPase regulatory subunit 6 OS=Mus musculus OX=10090 GN=Psmd6 PE=1 SV=1	[R].ENNMAPYYEALCK.[S]	1xCarbamidomethyl [C12]; 1xOxidation [M4]	4.91158e-06	3.46687e-05	1	1	1	1	Q99JI4 [47-59]	Q99JI4 1xCarbamidomethyl [C58]	0	1618.69	High	n/a	High		7.935e-06		3.471e-07	2.58
Q99JI4	26S proteasome non-ATPase regulatory subunit 6 OS=Mus musculus OX=10090 GN=Psmd6 PE=1 SV=1	[R].LHCKIDK.[V]	1xCarbamidomethyl [C3]	0.0232063	0.000806488	1	1	1	1	Q99JI4 [343-349]	Q99JI4 1xCarbamidomethyl [C345]	1	913.492	High	n/a	High		0.0002301		0.00242	1.31
Q99JI4	26S proteasome non-ATPase regulatory subunit 6 OS=Mus musculus OX=10090 GN=Psmd6 PE=1 SV=1	[K].AEYLCQIGDKEGALTAFR.[K]	1xCarbamidomethyl [C5]	2.70391e-09	3.46687e-05	1	1	1	2	Q99JI4 [108-125]	Q99JI4 1xCarbamidomethyl [C112]	1	2042	High	n/a	High		7.935e-06		1.258e-10	4.99
Q99JI4	26S proteasome non-ATPase regulatory subunit 6 OS=Mus musculus OX=10090 GN=Psmd6 PE=1 SV=1	[K].AEYLCQIGDK.[E]	1xCarbamidomethyl [C5]	0.000243411	3.46687e-05	1	1	1	4	Q99JI4 [108-117]	Q99JI4 1xCarbamidomethyl [C112]	0	1196.56	High	n/a	High		7.935e-06		2.115e-05	2.61
Q99JI4	26S proteasome non-ATPase regulatory subunit 6 OS=Mus musculus OX=10090 GN=Psmd6 PE=1 SV=1	[K].VYQGLYCVAIRDFK.[Q]	1xCarbamidomethyl [C7]	4.86439e-08	3.46687e-05	1	1	1	6	Q99JI4 [182-195]	Q99JI4 1xCarbamidomethyl [C188]	1	1731.89	High	n/a	High		7.935e-06		2.649e-09	3.76
Q99JI4	26S proteasome non-ATPase regulatory subunit 6 OS=Mus musculus OX=10090 GN=Psmd6 PE=1 SV=1	[K].VYQGLYCVAIR.[D]	1xCarbamidomethyl [C7]	0.000158867	3.46687e-05	1	1	1	4	Q99JI4 [182-192]	Q99JI4 1xCarbamidomethyl [C188]	0	1341.7	High	n/a	High		7.935e-06		1.357e-05	2.49
Q99JI4	26S proteasome non-ATPase regulatory subunit 6 OS=Mus musculus OX=10090 GN=Psmd6 PE=1 SV=1	[R].LKVYQGLYCVAIR.[D]	1xCarbamidomethyl [C9]	6.18905e-06	3.46687e-05	1	1	1	1	Q99JI4 [180-192]	Q99JI4 1xCarbamidomethyl [C188]	1	1582.88	High	n/a	High		7.935e-06		4.392e-07	2.78
P26516	26S proteasome non-ATPase regulatory subunit 7 OS=Mus musculus OX=10090 GN=Psmd7 PE=1 SV=2	[R].YCPNSVLVIIDVKPK.[D]	1xCarbamidomethyl [C2]	1.86268e-07	3.46687e-05	1	1	1	22	P26516 [115-129]	P26516 1xCarbamidomethyl [C116]	0	1744.97	High	n/a	High		7.935e-06		1.09e-08	2.49
P26516	26S proteasome non-ATPase regulatory subunit 7 OS=Mus musculus OX=10090 GN=Psmd7 PE=1 SV=2	[K].RYCPNSVLVIIDVKPK.[D]	1xCarbamidomethyl [C3]	9.23068e-07	3.46687e-05	1	1	1	7	P26516 [114-129]	P26516 1xCarbamidomethyl [C116]	1	1901.07	High	n/a	High		7.935e-06		5.951e-08	3.77
Q9CX56	26S proteasome non-ATPase regulatory subunit 8 OS=Mus musculus OX=10090 GN=Psmd8 PE=1 SV=2	[K].CGEELGR.[L]	1xCarbamidomethyl [C1]	0.0132533	0.000480989	1	1	1	4	Q9CX56 [115-121]	Q9CX56 1xCarbamidomethyl [C115]	0	820.362	High	n/a	High		0.0001237		0.001317	1.71
Q9CX56	26S proteasome non-ATPase regulatory subunit 8 OS=Mus musculus OX=10090 GN=Psmd8 PE=1 SV=2	[R].DILEIGAQWSILCK.[D]	1xCarbamidomethyl [C13]	7.33034e-05	3.46687e-05	1	1	1	2	Q9CX56 [149-162]	Q9CX56 1xCarbamidomethyl [C161]	0	1645.86	High	n/a	High		7.935e-06		5.983e-06	1.61
Q9CR00	26S proteasome non-ATPase regulatory subunit 9 OS=Mus musculus OX=10090 GN=Psmd9 PE=1 SV=1	[R].HNIICLQNDHK.[A]	1xCarbamidomethyl [C5]	8.08347e-05	3.46687e-05	1	1	1	2	Q9CR00 [77-87]	Q9CR00 1xCarbamidomethyl [C81]	0	1391.68	High	n/a	High		7.935e-06		6.614e-06	1.99
Q9CR00	26S proteasome non-ATPase regulatory subunit 9 OS=Mus musculus OX=10090 GN=Psmd9 PE=1 SV=1	[K].GLLGCNIIPLQR.[-]	1xCarbamidomethyl [C5]	0.000102766	3.46687e-05	1	1	1	6	Q9CR00 [211-222]	Q9CR00 1xCarbamidomethyl [C215]	0	1353.77	High	n/a	High		7.935e-06		8.575e-06	2.45
P62334	26S proteasome regulatory subunit 10B OS=Mus musculus OX=10090 GN=Psmc6 PE=1 SV=1	[K].GCLLYGPPGTGK.[T]	1xCarbamidomethyl [C2]	0.000124966	3.46687e-05	1	1	1	8	P62334 [169-180]	P62334 1xCarbamidomethyl [C170]	0	1219.61	High	n/a	High		7.935e-06		1.05e-05	2.98
P62334	26S proteasome regulatory subunit 10B OS=Mus musculus OX=10090 GN=Psmc6 PE=1 SV=1	[R].DHQPCIIFMDEIDAIGGR.[R]	1xCarbamidomethyl [C5]	6.75942e-08	3.46687e-05	1	1	1	7	P62334 [224-241]	P62334 1xCarbamidomethyl [C228]	0	2086.97	High	n/a	High		7.935e-06		3.742e-09	4.38
P62334	26S proteasome regulatory subunit 10B OS=Mus musculus OX=10090 GN=Psmc6 PE=1 SV=1	[R].YVVGCRRQLDK.[S]	1xCarbamidomethyl [C5]	0.00534062	0.000289748	1	1	1	1	P62334 [79-89]	P62334 1xCarbamidomethyl [C83]	2	1393.74	High	n/a	High		7.049e-05		0.0005153	2.31
P62334	26S proteasome regulatory subunit 10B OS=Mus musculus OX=10090 GN=Psmc6 PE=1 SV=1	[R].YVVGCRR.[Q]	1xCarbamidomethyl [C5]	0.178657	0.00622549	1	1	1	2	P62334 [79-85]	P62334 1xCarbamidomethyl [C83]	1	909.472	High	n/a	High		0.001533		0.03294	1.5
P62334	26S proteasome regulatory subunit 10B OS=Mus musculus OX=10090 GN=Psmc6 PE=1 SV=1	[R].DHQPCIIFMDEIDAIGGR.[R]	1xCarbamidomethyl [C5]; 1xOxidation [M9]	1.14221e-07	3.46687e-05	1	1	1	3	P62334 [224-241]	P62334 1xCarbamidomethyl [C228]	0	2102.96	High	n/a	High		7.935e-06		6.56e-09	4.25
P62334	26S proteasome regulatory subunit 10B OS=Mus musculus OX=10090 GN=Psmc6 PE=1 SV=1	[R].AVASQLDCNFLKVVSSSIVDKYIGESAR.[L]	1xCarbamidomethyl [C8]	1.24843e-07	3.46687e-05	1	1	1	2	P62334 [186-213]	P62334 1xCarbamidomethyl [C193]	2	3056.57	High	n/a	High		7.935e-06		7.149e-09	5.14
P62334	26S proteasome regulatory subunit 10B OS=Mus musculus OX=10090 GN=Psmc6 PE=1 SV=1	[R].AVASQLDCNFLKVVSSSIVDK.[Y]	1xCarbamidomethyl [C8]	3.6953e-06	3.46687e-05	1	1	1	1	P62334 [186-206]	P62334 1xCarbamidomethyl [C193]	1	2280.19	High	n/a	High		7.935e-06		2.566e-07	5.75
P62334	26S proteasome regulatory subunit 10B OS=Mus musculus OX=10090 GN=Psmc6 PE=1 SV=1	[R].AVASQLDCNFLK.[V]	1xCarbamidomethyl [C8]	9.57106e-05	3.46687e-05	1	1	1	15	P62334 [186-197]	P62334 1xCarbamidomethyl [C193]	0	1365.68	High	n/a	High		7.935e-06		7.939e-06	1.99
P62334	26S proteasome regulatory subunit 10B OS=Mus musculus OX=10090 GN=Psmc6 PE=1 SV=1	[R].VGIIPPKGCLLYGPPGTGK.[T]	1xCarbamidomethyl [C9]	2.75243e-09	3.46687e-05	1	1	1	9	P62334 [162-180]	P62334 1xCarbamidomethyl [C170]	1	1924.07	High	n/a	High		7.935e-06		1.283e-10	3.32
P62192	26S proteasome regulatory subunit 4 OS=Mus musculus OX=10090 GN=Psmc1 PE=1 SV=1	[K].LPLVTPHTQCRLK.[L]	1xCarbamidomethyl [C10]	2.18682e-06	3.46687e-05	1	1	1	2	P62192 [49-61]	P62192 1xCarbamidomethyl [C58]	1	1562.88	High	n/a	High		7.935e-06		1.47e-07	2.09
P62192	26S proteasome regulatory subunit 4 OS=Mus musculus OX=10090 GN=Psmc1 PE=1 SV=1	[K].LPLVTPHTQCR.[L]	1xCarbamidomethyl [C10]	8.21988e-08	3.46687e-05	1	1	1	14	P62192 [49-59]	P62192 1xCarbamidomethyl [C58]	0	1321.7	High	n/a	High		7.935e-06		4.619e-09	2.56
P62192	26S proteasome regulatory subunit 4 OS=Mus musculus OX=10090 GN=Psmc1 PE=1 SV=1	[K].AICTEAGLMALR.[E]	1xCarbamidomethyl [C3]; 1xOxidation [M9]	0.123951	0.00412416	1	1	1	1	P62192 [397-408]	P62192 1xCarbamidomethyl [C399]	0	1321.66	High	n/a	High		0.001033		0.0193	1.13
P62192	26S proteasome regulatory subunit 4 OS=Mus musculus OX=10090 GN=Psmc1 PE=1 SV=1	[K].DLLEPGCSVLLNHK.[V]	1xCarbamidomethyl [C7]	5.81557e-06	3.46687e-05	1	1	1	4	P62192 [142-155]	P62192 1xCarbamidomethyl [C148]	0	1594.83	High	n/a	High		7.935e-06		4.131e-07	4.32
O88685	26S proteasome regulatory subunit 6A OS=Mus musculus OX=10090 GN=Psmc3 PE=1 SV=2	[K].AVCVEAGMIALR.[R]	1xCarbamidomethyl [C3]	2.88189e-05	3.46687e-05	1	1	1	7	O88685 [401-412]	O88685 1xCarbamidomethyl [C403]	0	1289.67	High	n/a	High		7.935e-06		2.234e-06	2.57
O88685	26S proteasome regulatory subunit 6A OS=Mus musculus OX=10090 GN=Psmc3 PE=1 SV=2	[K].GKCAVIK.[T]	1xCarbamidomethyl [C3]	0.0298454	0.000991055	1	1	1	1	O88685 [122-128]	O88685 1xCarbamidomethyl [C124]	1	775.449	High	n/a	High		0.0002798		0.003202	1.69
O88685	26S proteasome regulatory subunit 6A OS=Mus musculus OX=10090 GN=Psmc3 PE=1 SV=2	[K].AVCVEAGMIALR.[R]	1xCarbamidomethyl [C3]; 1xOxidation [M8]	1.04582e-05	3.46687e-05	1	1	1	4	O88685 [401-412]	O88685 1xCarbamidomethyl [C403]	0	1305.67	High	n/a	High		7.935e-06		7.702e-07	2.57
O88685	26S proteasome regulatory subunit 6A OS=Mus musculus OX=10090 GN=Psmc3 PE=1 SV=2	[R].KGKCAVIK.[T]	1xCarbamidomethyl [C4]	0.00956812	0.000366757	1	1	1	3	O88685 [121-128]	O88685 1xCarbamidomethyl [C124]	2	903.544	High	n/a	High		8.513e-05		0.0009355	2.53
O88685	26S proteasome regulatory subunit 6A OS=Mus musculus OX=10090 GN=Psmc3 PE=1 SV=2	[K].TLLARACAAQTK.[A]	1xCarbamidomethyl [C7]	2.95875e-06	3.46687e-05	1	1	1	5	O88685 [237-248]	O88685 1xCarbamidomethyl [C243]	1	1303.72	High	n/a	High		7.935e-06		2.024e-07	4.31
P54775	26S proteasome regulatory subunit 6B OS=Mus musculus OX=10090 GN=Psmc4 PE=1 SV=2	[K].ISGADINSICQESGMLAVR.[E]	1xCarbamidomethyl [C10]	1.24891e-06	3.46687e-05	1	1	1	1	P54775 [370-388]	P54775 1xCarbamidomethyl [C379]	0	2020.98	High	n/a	High		7.935e-06		8.167e-08	2.8
P54775	26S proteasome regulatory subunit 6B OS=Mus musculus OX=10090 GN=Psmc4 PE=1 SV=2	[R].GVLMYGPPGCGK.[T]	1xCarbamidomethyl [C10]	2.24675e-05	3.46687e-05	1	1	1	4	P54775 [201-212]	P54775 1xCarbamidomethyl [C210]	0	1235.59	High	n/a	High		7.935e-06		1.723e-06	2.52
P54775	26S proteasome regulatory subunit 6B OS=Mus musculus OX=10090 GN=Psmc4 PE=1 SV=2	[R].GVLMYGPPGCGK.[T]	1xCarbamidomethyl [C10]; 1xOxidation [M4]	3.53583e-05	3.46687e-05	1	1	1	4	P54775 [201-212]	P54775 1xCarbamidomethyl [C210]	0	1251.59	High	n/a	High		7.935e-06		2.786e-06	1.93
P46471	26S proteasome regulatory subunit 7 OS=Mus musculus OX=10090 GN=Psmc2 PE=1 SV=5	[K].GVLLFGPPGTGKTLCAR.[A]	1xCarbamidomethyl [C15]	4.10825e-08	3.46687e-05	1	1	1	3	P46471 [211-227]	P46471 1xCarbamidomethyl [C225]	1	1743.96	High	n/a	High		7.935e-06		2.225e-09	3.99
P46471	26S proteasome regulatory subunit 7 OS=Mus musculus OX=10090 GN=Psmc2 PE=1 SV=5	[R].LCPNSTGAEIR.[S]	1xCarbamidomethyl [C2]	0.000739129	3.46687e-05	1	1	1	4	P46471 [376-386]	P46471 1xCarbamidomethyl [C377]	0	1217.59	High	n/a	High		7.935e-06		6.743e-05	2.95
P46471	26S proteasome regulatory subunit 7 OS=Mus musculus OX=10090 GN=Psmc2 PE=1 SV=5	[K].ACLIFFDEIDAIGGAR.[F]	1xCarbamidomethyl [C2]	6.18196e-09	3.46687e-05	1	1	1	38	P46471 [269-284]	P46471 1xCarbamidomethyl [C270]	0	1767.87	High	n/a	High		7.935e-06		3.002e-10	3.69
P46471	26S proteasome regulatory subunit 7 OS=Mus musculus OX=10090 GN=Psmc2 PE=1 SV=5	[K].IDPTVTMMQVEEKPDVTYSDVGGCKEQIEK.[L]	1xCarbamidomethyl [C24]	4.06719e-11	3.46687e-05	1	1	1	1	P46471 [157-186]	P46471 1xCarbamidomethyl [C180]	1	3426.61	High	n/a	High		7.935e-06		1.503e-12	3.49
P46471	26S proteasome regulatory subunit 7 OS=Mus musculus OX=10090 GN=Psmc2 PE=1 SV=5	[R].SVCTEAGMFAIRAR.[R]	1xCarbamidomethyl [C3]	2.22686e-05	3.46687e-05	1	1	1	1	P46471 [387-400]	P46471 1xCarbamidomethyl [C389]	1	1568.77	High	n/a	High		7.935e-06		1.697e-06	3.95
P46471	26S proteasome regulatory subunit 7 OS=Mus musculus OX=10090 GN=Psmc2 PE=1 SV=5	[R].SVCTEAGMFAIR.[A]	1xCarbamidomethyl [C3]	0.000393344	3.46687e-05	1	1	1	2	P46471 [387-398]	P46471 1xCarbamidomethyl [C389]	0	1341.63	High	n/a	High		7.935e-06		3.49e-05	1.91
P46471	26S proteasome regulatory subunit 7 OS=Mus musculus OX=10090 GN=Psmc2 PE=1 SV=5	[K].KACLIFFDEIDAIGGAR.[F]	1xCarbamidomethyl [C3]	3.65979e-08	3.46687e-05	1	1	1	2	P46471 [268-284]	P46471 1xCarbamidomethyl [C270]	1	1895.97	High	n/a	High		7.935e-06		1.963e-09	3.71
P46471	26S proteasome regulatory subunit 7 OS=Mus musculus OX=10090 GN=Psmc2 PE=1 SV=5	[K].TLCARAVANR.[T]	1xCarbamidomethyl [C3]	0.00568179	0.000314522	1	1	1	1	P46471 [223-232]	P46471 1xCarbamidomethyl [C225]	1	1131.61	High	n/a	High		7.473e-05		0.0005471	1.24
P46471	26S proteasome regulatory subunit 7 OS=Mus musculus OX=10090 GN=Psmc2 PE=1 SV=5	[R].TDACFIRVIGSELVQK.[Y]	1xCarbamidomethyl [C4]	2.68306e-06	3.46687e-05	1	1	1	2	P46471 [233-248]	P46471 1xCarbamidomethyl [C236]	1	1835.97	High	n/a	High		7.935e-06		1.83e-07	4.58
P46471	26S proteasome regulatory subunit 7 OS=Mus musculus OX=10090 GN=Psmc2 PE=1 SV=5	[R].TDACFIRVIGSELVQKYVGEGAR.[M]	1xCarbamidomethyl [C4]	0.00127039	0.000106916	1	1	1	1	P46471 [233-255]	P46471 1xCarbamidomethyl [C236]	2	2568.32	High	n/a	High		1.496e-05		0.0001183	2.8
P46471	26S proteasome regulatory subunit 7 OS=Mus musculus OX=10090 GN=Psmc2 PE=1 SV=5	[R].TDACFIR.[V]	1xCarbamidomethyl [C4]	0.0132533	0.000480989	1	1	1	12	P46471 [233-239]	P46471 1xCarbamidomethyl [C236]	0	882.414	High	n/a	High		0.0001237		0.001322	1.27
P46471	26S proteasome regulatory subunit 7 OS=Mus musculus OX=10090 GN=Psmc2 PE=1 SV=5	[R].TKKACLIFFDEIDAIGGAR.[F]	1xCarbamidomethyl [C5]	6.18196e-09	3.46687e-05	1	1	1	5	P46471 [266-284]	P46471 1xCarbamidomethyl [C270]	2	2125.11	High	n/a	High		7.935e-06		3.015e-10	4.07
P46471	26S proteasome regulatory subunit 7 OS=Mus musculus OX=10090 GN=Psmc2 PE=1 SV=5	[R].AVANRTDACFIRVIGSELVQK.[Y]	1xCarbamidomethyl [C9]	8.29648e-07	3.46687e-05	1	1	1	3	P46471 [228-248]	P46471 1xCarbamidomethyl [C236]	2	2347.26	High	n/a	High		7.935e-06		5.297e-08	4.19
P62196	26S proteasome regulatory subunit 8 OS=Mus musculus OX=10090 GN=Psmc5 PE=1 SV=1	[K].NIDINDVTPNCRVALR.[N]	1xCarbamidomethyl [C11]	1.28314e-05	3.46687e-05	1	1	1	2	P62196 [102-117]	P62196 1xCarbamidomethyl [C112]	1	1869.96	High	n/a	High		7.935e-06		9.561e-07	2.82
P62196	26S proteasome regulatory subunit 8 OS=Mus musculus OX=10090 GN=Psmc5 PE=1 SV=1	[K].NIDINDVTPNCR.[V]	1xCarbamidomethyl [C11]	9.65394e-06	3.46687e-05	1	1	1	2	P62196 [102-113]	P62196 1xCarbamidomethyl [C112]	0	1430.67	High	n/a	High		7.935e-06		7.041e-07	3.02
P62196	26S proteasome regulatory subunit 8 OS=Mus musculus OX=10090 GN=Psmc5 PE=1 SV=1	[R].AVAHHTDCTFIR.[V]	1xCarbamidomethyl [C8]	1.60256e-05	3.46687e-05	1	1	1	11	P62196 [202-213]	P62196 1xCarbamidomethyl [C209]	0	1427.68	High	n/a	High		7.935e-06		1.199e-06	4.24
P62196	26S proteasome regulatory subunit 8 OS=Mus musculus OX=10090 GN=Psmc5 PE=1 SV=1	[R].AVAHHTDCTFIRVSGSELVQK.[F]	1xCarbamidomethyl [C8]	2.7312e-06	3.46687e-05	1	1	1	2	P62196 [202-222]	P62196 1xCarbamidomethyl [C209]	1	2355.19	High	n/a	High		7.935e-06		1.856e-07	4.29
Q9DCA2	28S ribosomal protein S11, mitochondrial OS=Mus musculus OX=10090 GN=Mrps11 PE=1 SV=2	[R].ASCGTEGFR.[N]	1xCarbamidomethyl [C3]	0.000906625	7.02174e-05	1	1	1	6	Q9DCA2 [107-115]	Q9DCA2 1xCarbamidomethyl [C109]	0	984.42	High	n/a	High		1.496e-05		8.378e-05	1.98
O35680	28S ribosomal protein S12, mitochondrial OS=Mus musculus OX=10090 GN=Mrps12 PE=2 SV=1	[K].YDCGHVQK.[K]	1xCarbamidomethyl [C3]	0.00524695	0.000289748	1	1	1	1	O35680 [130-137]	O35680 1xCarbamidomethyl [C132]	0	1006.44	High	n/a	High		7.049e-05		0.0005021	1.92
O35680	28S ribosomal protein S12, mitochondrial OS=Mus musculus OX=10090 GN=Mrps12 PE=2 SV=1	[K].EAVCFIPGEGHTLQEHHVVLVEGGR.[T]	1xCarbamidomethyl [C4]	6.69187e-11	3.46687e-05	1	1	1	3	O35680 [90-114]	O35680 1xCarbamidomethyl [C93]	0	2770.37	High	n/a	High		7.935e-06		2.544e-12	5.92
Q9CPX7	28S ribosomal protein S16, mitochondrial OS=Mus musculus OX=10090 GN=Mrps16 PE=1 SV=1	[R].HWIGCGAHLSKPMEK.[L]	1xCarbamidomethyl [C5]	3.86182e-07	3.46687e-05	1	1	1	3	Q9CPX7 [75-89]	Q9CPX7 1xCarbamidomethyl [C79]	0	1750.85	High	n/a	High		7.935e-06		2.354e-08	3.74
Q9CPX7	28S ribosomal protein S16, mitochondrial OS=Mus musculus OX=10090 GN=Mrps16 PE=1 SV=1	[R].HWIGCGAHLSKPMEK.[L]	1xCarbamidomethyl [C5]; 1xOxidation [M13]	1.61628e-06	3.46687e-05	1	1	1	3	Q9CPX7 [75-89]	Q9CPX7 1xCarbamidomethyl [C79]	0	1766.85	High	n/a	High		7.935e-06		1.067e-07	2.18
Q9CPX7	28S ribosomal protein S16, mitochondrial OS=Mus musculus OX=10090 GN=Mrps16 PE=1 SV=1	[R].LALGGCTNRPFYR.[I]	1xCarbamidomethyl [C6]	0.00037292	3.46687e-05	1	1	1	4	Q9CPX7 [21-33]	Q9CPX7 1xCarbamidomethyl [C26]	0	1524.77	High	n/a	High		7.935e-06		3.309e-05	2.17
Q9CPX7	28S ribosomal protein S16, mitochondrial OS=Mus musculus OX=10090 GN=Mrps16 PE=1 SV=1	[R].IVAAHNKCPRDGR.[F]	1xCarbamidomethyl [C8]	5.04245e-07	3.46687e-05	1	1	1	2	Q9CPX7 [34-46]	Q9CPX7 1xCarbamidomethyl [C41]	2	1493.78	High	n/a	High		7.935e-06		3.117e-08	3.16
Q9CPX7	28S ribosomal protein S16, mitochondrial OS=Mus musculus OX=10090 GN=Mrps16 PE=1 SV=1	[R].IVAAHNKCPR.[D]	1xCarbamidomethyl [C8]	1.66059e-05	3.46687e-05	1	1	1	2	Q9CPX7 [34-43]	Q9CPX7 1xCarbamidomethyl [C41]	1	1165.63	High	n/a	High		7.935e-06		1.249e-06	2.92
Q9CQE3	28S ribosomal protein S17, mitochondrial OS=Mus musculus OX=10090 GN=Mrps17 PE=1 SV=1	[K].TYFAHDALQQCSVGDIVLLR.[A]	1xCarbamidomethyl [C11]	2.75031e-11	3.46687e-05	1	1	1	6	Q9CQE3 [48-67]	Q9CQE3 1xCarbamidomethyl [C58]	0	2306.16	High	n/a	High		7.935e-06		9.901e-13	6.27
Q99N85	28S ribosomal protein S18a, mitochondrial OS=Mus musculus OX=10090 GN=Mrps18a PE=2 SV=1	[R].AGLLPNHRPQLPEGCLPKDKPK.[L]	1xCarbamidomethyl [C15]	7.32815e-06	3.46687e-05	1	1	1	1	Q99N85 [125-146]	Q99N85 1xCarbamidomethyl [C139]	1	2465.34	High	n/a	High		7.935e-06		5.251e-07	1.09
Q99N85	28S ribosomal protein S18a, mitochondrial OS=Mus musculus OX=10090 GN=Mrps18a PE=2 SV=1	[R].AGLLPNHRPQLPEGCLPK.[D]	1xCarbamidomethyl [C15]	6.18671e-07	3.46687e-05	1	1	1	6	Q99N85 [125-142]	Q99N85 1xCarbamidomethyl [C139]	0	1997.07	High	n/a	High		7.935e-06		3.893e-08	4.07
Q99N85	28S ribosomal protein S18a, mitochondrial OS=Mus musculus OX=10090 GN=Mrps18a PE=2 SV=1	[K].DNVCYSR.[R]	1xCarbamidomethyl [C4]	0.106046	0.00355625	1	1	1	1	Q99N85 [183-189]	Q99N85 1xCarbamidomethyl [C186]	0	913.383	High	n/a	High		0.0009034		0.01545	2.55
Q99N85	28S ribosomal protein S18a, mitochondrial OS=Mus musculus OX=10090 GN=Mrps18a PE=2 SV=1	[R].VTGLCREEHR.[K]	1xCarbamidomethyl [C5]	0.000707023	3.46687e-05	1	1	1	2	Q99N85 [104-113]	Q99N85 1xCarbamidomethyl [C108]	1	1256.62	High	n/a	High		7.935e-06		6.471e-05	2.73
Q99N85	28S ribosomal protein S18a, mitochondrial OS=Mus musculus OX=10090 GN=Mrps18a PE=2 SV=1	[R].KIEECVK.[M]	1xCarbamidomethyl [C5]	0.0259827	0.000883695	1	1	1	3	Q99N85 [114-120]	Q99N85 1xCarbamidomethyl [C118]	1	905.476	High	n/a	High		0.0002541		0.002736	1.47
Q99N85	28S ribosomal protein S18a, mitochondrial OS=Mus musculus OX=10090 GN=Mrps18a PE=2 SV=1	[R].RVTGLCREEHR.[K]	1xCarbamidomethyl [C6]	1.17398e-05	3.46687e-05	1	1	1	2	Q99N85 [103-113]	Q99N85 1xCarbamidomethyl [C108]	2	1412.72	High	n/a	High		7.935e-06		8.683e-07	4.51
Q99N85	28S ribosomal protein S18a, mitochondrial OS=Mus musculus OX=10090 GN=Mrps18a PE=2 SV=1	[K].ATPDPPNPSGQCPICR.[W]	2xCarbamidomethyl [C12; C15]	1.06378e-07	3.46687e-05	1	1	1	2	Q99N85 [59-74]	Q99N85 2xCarbamidomethyl [C70; C73]	0	1766.79	High	n/a	High		7.935e-06		6.081e-09	2.34
Q99N84	28S ribosomal protein S18b, mitochondrial OS=Mus musculus OX=10090 GN=Mrps18b PE=1 SV=1	[R].ECGLLSYYVPQVEPR.[D]	1xCarbamidomethyl [C2]	3.35098e-06	3.46687e-05	1	2	1	2	Q99N84 [157-171]	Q99N84 1xCarbamidomethyl [C158]	0	1809.88	High	n/a	High		7.935e-06		2.316e-07	2.56
Q99N84	28S ribosomal protein S18b, mitochondrial OS=Mus musculus OX=10090 GN=Mrps18b PE=1 SV=1	[K].VAGNPCPICR.[D]	2xCarbamidomethyl [C6; C9]	0.000153318	3.46687e-05	1	1	1	4	Q99N84 [98-107]	Q99N84 2xCarbamidomethyl [C103; C106]	0	1143.54	High	n/a	High		7.935e-06		1.304e-05	2.7
Q8R2L5	28S ribosomal protein S18c, mitochondrial OS=Mus musculus OX=10090 GN=Mrps18c PE=1 SV=1	[R].HITGLCGKK.[Q]	1xCarbamidomethyl [C6]	0.000126082	3.46687e-05	1	1	1	4	Q8R2L5 [96-104]	Q8R2L5 1xCarbamidomethyl [C101]	1	1013.56	High	n/a	High		7.935e-06		1.063e-05	1.82
Q8R2L5	28S ribosomal protein S18c, mitochondrial OS=Mus musculus OX=10090 GN=Mrps18c PE=1 SV=1	[R].HITGLCGK.[K]	1xCarbamidomethyl [C6]	0.000396855	3.46687e-05	1	1	1	11	Q8R2L5 [96-103]	Q8R2L5 1xCarbamidomethyl [C101]	0	885.461	High	n/a	High		7.935e-06		3.524e-05	0.71
P58059	28S ribosomal protein S21, mitochondrial OS=Mus musculus OX=10090 GN=Mrps21 PE=1 SV=1	[R].YYEKPCR.[R]	1xCarbamidomethyl [C6]	0.0133703	0.000480989	1	1	1	3	P58059 [44-50]	P58059 1xCarbamidomethyl [C49]	0	1015.47	High	n/a	High		0.0001237		0.00133	1.68
P58059	28S ribosomal protein S21, mitochondrial OS=Mus musculus OX=10090 GN=Mrps21 PE=1 SV=1	[R].ADPWLGC.[-]	1xCarbamidomethyl [C7]	0.235738	0.00875471	1	1	1	1	P58059 [81-87]	P58059 1xCarbamidomethyl [C87]	0	818.35	High	n/a	High		0.00213		0.051	2.21
Q9CXW2	28S ribosomal protein S22, mitochondrial OS=Mus musculus OX=10090 GN=Mrps22 PE=1 SV=1	[R].HADVLNLCVAQFEPDSAEYIK.[V]	1xCarbamidomethyl [C8]	1.04383e-10	3.46687e-05	1	1	1	4	Q9CXW2 [223-243]	Q9CXW2 1xCarbamidomethyl [C230]	0	2419.16	High	n/a	High		7.935e-06		4.07e-12	6.5
Q9CQV5	28S ribosomal protein S24, mitochondrial OS=Mus musculus OX=10090 GN=Mrps24 PE=1 SV=1	[R].ANQVDICALVLR.[Q]	1xCarbamidomethyl [C7]	1.66059e-05	3.46687e-05	1	1	1	6	Q9CQV5 [114-125]	Q9CQV5 1xCarbamidomethyl [C120]	0	1371.74	High	n/a	High		7.935e-06		1.256e-06	2.53
Q9CQV5	28S ribosomal protein S24, mitochondrial OS=Mus musculus OX=10090 GN=Mrps24 PE=1 SV=1	[K].FMMGTFPGCLADQIVLK.[R]	1xCarbamidomethyl [C9]	1.53288e-05	3.46687e-05	1	1	1	1	Q9CQV5 [95-111]	Q9CQV5 1xCarbamidomethyl [C103]	0	1927.95	High	n/a	High		7.935e-06		1.146e-06	2.1
Q9D125	28S ribosomal protein S25, mitochondrial OS=Mus musculus OX=10090 GN=Mrps25 PE=1 SV=1	[R].ECMCEVEGQVPCPGLVPLPK.[E]	3xCarbamidomethyl [C2; C4; C12]	8.82928e-07	3.46687e-05	1	1	1	1	Q9D125 [138-157]	Q9D125 3xCarbamidomethyl [C139; C141; C149]	0	2299.06	High	n/a	High		7.935e-06		5.642e-08	3.56
Q8BK72	28S ribosomal protein S27, mitochondrial OS=Mus musculus OX=10090 GN=Mrps27 PE=1 SV=2	[K].LPACEAEDLATYEQK.[L]	1xCarbamidomethyl [C4]	2.12599e-10	3.46687e-05	1	1	1	2	Q8BK72 [365-379]	Q8BK72 1xCarbamidomethyl [C368]	0	1737.8	High	n/a	High		7.935e-06		8.567e-12	4.06
Q8BK72	28S ribosomal protein S27, mitochondrial OS=Mus musculus OX=10090 GN=Mrps27 PE=1 SV=2	[R].HSPNCWYLR.[D]	1xCarbamidomethyl [C5]	0.0101772	0.000366757	1	1	1	1	Q8BK72 [97-105]	Q8BK72 1xCarbamidomethyl [C101]	0	1232.56	High	n/a	High		9.024e-05		0.001002	3.05
Q9ER88	28S ribosomal protein S29, mitochondrial OS=Mus musculus OX=10090 GN=Dap3 PE=1 SV=1	[R].FLSNCNPEQLER.[L]	1xCarbamidomethyl [C5]	2.20715e-05	3.46687e-05	1	2	1	1	Q9ER88 [375-386]	Q9ER88 1xCarbamidomethyl [C379]	0	1506.7	High	n/a	High		7.935e-06		1.693e-06	3.24
Q9ER88	28S ribosomal protein S29, mitochondrial OS=Mus musculus OX=10090 GN=Dap3 PE=1 SV=1	[K].TFGEACLMVR.[K]	1xCarbamidomethyl [C6]	0.000379608	3.46687e-05	1	2	1	3	Q9ER88 [86-95]	Q9ER88 1xCarbamidomethyl [C91]	0	1183.56	High	n/a	High		7.935e-06		3.369e-05	2.53
Q9ER88	28S ribosomal protein S29, mitochondrial OS=Mus musculus OX=10090 GN=Dap3 PE=1 SV=1	[K].TFGEACLMVR.[K]	1xCarbamidomethyl [C6]; 1xOxidation [M8]	0.000288193	3.46687e-05	1	2	1	3	Q9ER88 [86-95]	Q9ER88 1xCarbamidomethyl [C91]	0	1199.55	High	n/a	High		7.935e-06		2.537e-05	1.69
Q9ER88	28S ribosomal protein S29, mitochondrial OS=Mus musculus OX=10090 GN=Dap3 PE=1 SV=1	[K].TLSLCHAVHFCAR.[H]	2xCarbamidomethyl [C5; C11]	0.000320628	3.46687e-05	1	2	1	1	Q9ER88 [128-140]	Q9ER88 2xCarbamidomethyl [C132; C138]	0	1571.76	High	n/a	High		7.935e-06		2.813e-05	2.97
Q9ER88	28S ribosomal protein S29, mitochondrial OS=Mus musculus OX=10090 GN=Dap3 PE=1 SV=1	[R].FLSNCNPEQLERLCASL.[-]	2xCarbamidomethyl [C5; C14]	1.86339e-06	3.46687e-05	1	2	1	3	Q9ER88 [375-391]	Q9ER88 2xCarbamidomethyl [C379; C388]	1	2050.97	High	n/a	High		7.935e-06		1.238e-07	2.48
Q9D0G0	28S ribosomal protein S30, mitochondrial OS=Mus musculus OX=10090 GN=Mrps30 PE=1 SV=1	[R].TLVNLLAPLNPVLSTAALDCK.[R]	1xCarbamidomethyl [C20]	8.06879e-10	3.46687e-05	1	1	1	7	Q9D0G0 [177-197]	Q9D0G0 1xCarbamidomethyl [C196]	0	2223.24	High	n/a	High		7.935e-06		3.505e-11	4.81
Q9D0G0	28S ribosomal protein S30, mitochondrial OS=Mus musculus OX=10090 GN=Mrps30 PE=1 SV=1	[K].NLCWGSQSQPLYETVEDNDVK.[G]	1xCarbamidomethyl [C3]	9.0645e-08	3.46687e-05	1	1	1	2	Q9D0G0 [385-405]	Q9D0G0 1xCarbamidomethyl [C387]	0	2482.12	High	n/a	High		7.935e-06		5.135e-09	3.57
Q9D0G0	28S ribosomal protein S30, mitochondrial OS=Mus musculus OX=10090 GN=Mrps30 PE=1 SV=1	[R].KNLCWGSQSQPLYETVEDNDVK.[G]	1xCarbamidomethyl [C4]	2.14745e-07	3.46687e-05	1	1	1	1	Q9D0G0 [384-405]	Q9D0G0 1xCarbamidomethyl [C387]	1	2610.21	High	n/a	High		7.935e-06		1.269e-08	4.14
Q61733	28S ribosomal protein S31, mitochondrial OS=Mus musculus OX=10090 GN=Mrps31 PE=1 SV=1	[R].LFMELVTCGLSK.[N]	1xCarbamidomethyl [C8]	2.11117e-05	3.46687e-05	1	1	1	1	Q61733 [338-349]	Q61733 1xCarbamidomethyl [C345]	0	1397.72	High	n/a	High		7.935e-06		1.617e-06	3.54
Q61733	28S ribosomal protein S31, mitochondrial OS=Mus musculus OX=10090 GN=Mrps31 PE=1 SV=1	[R].LFMELVTCGLSK.[N]	1xCarbamidomethyl [C8]; 1xOxidation [M3]	8.44851e-06	3.46687e-05	1	1	1	5	Q61733 [338-349]	Q61733 1xCarbamidomethyl [C345]	0	1413.71	High	n/a	High		7.935e-06		6.138e-07	3.21
Q9JIK9	28S ribosomal protein S34, mitochondrial OS=Mus musculus OX=10090 GN=Mrps34 PE=1 SV=1	[K].SWLWQHDEPCYWR.[L]	1xCarbamidomethyl [C10]	0.000469846	3.46687e-05	1	1	1	1	Q9JIK9 [84-96]	Q9JIK9 1xCarbamidomethyl [C93]	0	1862.81	High	n/a	High		7.935e-06		4.206e-05	1.89
Q8BJZ4	28S ribosomal protein S35, mitochondrial OS=Mus musculus OX=10090 GN=Mrps35 PE=1 SV=2	[K].ATDVLTITTDRCPLKR.[Q]	1xCarbamidomethyl [C12]	0.000147961	3.46687e-05	1	1	1	1	Q8BJZ4 [198-213]	Q8BJZ4 1xCarbamidomethyl [C209]	2	1860	High	n/a	High		7.935e-06		1.259e-05	3.01
Q8BJZ4	28S ribosomal protein S35, mitochondrial OS=Mus musculus OX=10090 GN=Mrps35 PE=1 SV=2	[K].DFCTEWPAALDSDEK.[C]	1xCarbamidomethyl [C3]	7.26328e-06	3.46687e-05	1	1	1	1	Q8BJZ4 [125-139]	Q8BJZ4 1xCarbamidomethyl [C127]	0	1783.75	High	n/a	High		7.935e-06		5.199e-07	1.84
Q8BJZ4	28S ribosomal protein S35, mitochondrial OS=Mus musculus OX=10090 GN=Mrps35 PE=1 SV=2	[R].HCAALKDFCTEWPAALDSDEK.[C]	2xCarbamidomethyl [C2; C9]	0.122052	0.00408226	1	1	1	1	Q8BJZ4 [119-139]	Q8BJZ4 2xCarbamidomethyl [C120; C127]	1	2464.09	High	n/a	High		0.001024		0.01892	1.14
Q99N87	28S ribosomal protein S5, mitochondrial OS=Mus musculus OX=10090 GN=Mrps5 PE=1 SV=1	[R].EECGPLPIVVASPHGALSK.[E]	1xCarbamidomethyl [C3]	1.81364e-07	3.46687e-05	1	1	1	2	Q99N87 [377-395]	Q99N87 1xCarbamidomethyl [C379]	0	1961.02	High	n/a	High		7.935e-06		1.064e-08	4.36
Q99N87	28S ribosomal protein S5, mitochondrial OS=Mus musculus OX=10090 GN=Mrps5 PE=1 SV=1	[R].AIITICR.[L]	1xCarbamidomethyl [C6]	0.0529032	0.00152429	1	1	1	4	Q99N87 [321-327]	Q99N87 1xCarbamidomethyl [C326]	0	846.487	High	n/a	High		0.0004295		0.006228	1.74
P58064	28S ribosomal protein S6, mitochondrial OS=Mus musculus OX=10090 GN=Mrps6 PE=1 SV=3	[K].ECDGIVPVPLEEK.[L]	1xCarbamidomethyl [C2]	0.000263683	3.46687e-05	1	1	1	1	P58064 [104-116]	P58064 1xCarbamidomethyl [C105]	0	1484.73	High	n/a	High		7.935e-06		2.292e-05	1.84
Q80X85	28S ribosomal protein S7, mitochondrial OS=Mus musculus OX=10090 GN=Mrps7 PE=1 SV=1	[K].NCEPVIGLVPILK.[G]	1xCarbamidomethyl [C2]	2.41152e-06	3.46687e-05	1	1	1	2	Q80X85 [151-163]	Q80X85 1xCarbamidomethyl [C152]	0	1451.83	High	n/a	High		7.935e-06		1.633e-07	3.32
Q80X85	28S ribosomal protein S7, mitochondrial OS=Mus musculus OX=10090 GN=Mrps7 PE=1 SV=1	[K].WMITECRENKPR.[R]	1xCarbamidomethyl [C6]	0.000312193	3.46687e-05	1	1	1	1	Q80X85 [186-197]	Q80X85 1xCarbamidomethyl [C191]	1	1619.78	High	n/a	High		7.935e-06		2.758e-05	2.3
Q80X85	28S ribosomal protein S7, mitochondrial OS=Mus musculus OX=10090 GN=Mrps7 PE=1 SV=1	[K].WMITECR.[E]	1xCarbamidomethyl [C6]	0.0142185	0.000508083	1	1	1	3	Q80X85 [186-192]	Q80X85 1xCarbamidomethyl [C191]	0	995.444	High	n/a	High		0.0001348		0.001426	1.68
Q80X85	28S ribosomal protein S7, mitochondrial OS=Mus musculus OX=10090 GN=Mrps7 PE=1 SV=1	[K].WMITECR.[E]	1xCarbamidomethyl [C6]; 1xOxidation [M2]	0.120178	0.00408226	1	1	1	2	Q80X85 [186-192]	Q80X85 1xCarbamidomethyl [C191]	0	1011.44	High	n/a	High		0.00102		0.01851	1.31
Q80X85	28S ribosomal protein S7, mitochondrial OS=Mus musculus OX=10090 GN=Mrps7 PE=1 SV=1	[R].IFHEALKNCEPVIGLVPILK.[G]	1xCarbamidomethyl [C9]	3.93261e-06	3.46687e-05	1	1	1	4	Q80X85 [144-163]	Q80X85 1xCarbamidomethyl [C152]	1	2290.3	High	n/a	High		7.935e-06		2.74e-07	3.87
Q9D7N3	28S ribosomal protein S9, mitochondrial OS=Mus musculus OX=10090 GN=Mrps9 PE=1 SV=3	[R].ALCSFVTEDEVEWMR.[Q]	1xCarbamidomethyl [C3]	4.41283e-07	3.46687e-05	1	1	1	4	Q9D7N3 [345-359]	Q9D7N3 1xCarbamidomethyl [C347]	0	1871.83	High	n/a	High		7.935e-06		2.729e-08	4.35
Q9D7N3	28S ribosomal protein S9, mitochondrial OS=Mus musculus OX=10090 GN=Mrps9 PE=1 SV=3	[R].ALCSFVTEDEVEWMR.[Q]	1xCarbamidomethyl [C3]; 1xOxidation [M14]	1.03618e-06	3.46687e-05	1	1	1	2	Q9D7N3 [345-359]	Q9D7N3 1xCarbamidomethyl [C347]	0	1887.83	High	Low	High	0.7344	7.935e-06	1	6.705e-08	1.71	43
Q9D7N3	28S ribosomal protein S9, mitochondrial OS=Mus musculus OX=10090 GN=Mrps9 PE=1 SV=3	[R].HDVTCTVSGGGR.[S]	1xCarbamidomethyl [C5]	3.09435e-05	3.46687e-05	1	1	1	4	Q9D7N3 [320-331]	Q9D7N3 1xCarbamidomethyl [C324]	0	1245.56	High	n/a	High		7.935e-06		2.406e-06	2.22
Q9D7N3	28S ribosomal protein S9, mitochondrial OS=Mus musculus OX=10090 GN=Mrps9 PE=1 SV=3	[K].LLTLPCGPAEEEFVQR.[F]	1xCarbamidomethyl [C6]	4.18036e-09	3.46687e-05	1	1	1	7	Q9D7N3 [222-237]	Q9D7N3 1xCarbamidomethyl [C227]	0	1858.94	High	n/a	High		7.935e-06		1.999e-10	3.6
O88986	2-amino-3-ketobutyrate coenzyme A ligase, mitochondrial OS=Mus musculus OX=10090 GN=Gcat PE=1 SV=2	[R].CILDSELEGIR.[G]	1xCarbamidomethyl [C1]	6.35833e-05	3.46687e-05	1	1	1	1	O88986 [26-36]	O88986 1xCarbamidomethyl [C26]	0	1304.65	High	n/a	High		7.935e-06		5.138e-06	2.86
O88986	2-amino-3-ketobutyrate coenzyme A ligase, mitochondrial OS=Mus musculus OX=10090 GN=Gcat PE=1 SV=2	[R].LAAQYGALVFVDECHATGFLGPTGR.[G]	1xCarbamidomethyl [C14]	6.70468e-06	3.46687e-05	1	1	1	1	O88986 [217-241]	O88986 1xCarbamidomethyl [C230]	0	2650.31	High	n/a	High		7.935e-06		4.78e-07	2.35
O88986	2-amino-3-ketobutyrate coenzyme A ligase, mitochondrial OS=Mus musculus OX=10090 GN=Gcat PE=1 SV=2	[R].VQISAVHSEEDIDRCVEAFVEVGR.[L]	1xCarbamidomethyl [C15]	1.19504e-05	3.46687e-05	1	1	1	2	O88986 [387-410]	O88986 1xCarbamidomethyl [C401]	1	2744.33	High	n/a	High		7.935e-06		8.797e-07	2.29
O88986	2-amino-3-ketobutyrate coenzyme A ligase, mitochondrial OS=Mus musculus OX=10090 GN=Gcat PE=1 SV=2	[R].LVATDGAFSMDGDIAPLQDICR.[L]	1xCarbamidomethyl [C21]	1.86125e-09	3.46687e-05	1	1	1	2	O88986 [195-216]	O88986 1xCarbamidomethyl [C215]	0	2365.12	High	n/a	High		7.935e-06		8.496e-11	3.98
O88986	2-amino-3-ketobutyrate coenzyme A ligase, mitochondrial OS=Mus musculus OX=10090 GN=Gcat PE=1 SV=2	[R].LVATDGAFSMDGDIAPLQDICR.[L]	1xCarbamidomethyl [C21]; 1xOxidation [M10]	6.64533e-06	3.46687e-05	1	1	1	1	O88986 [195-216]	O88986 1xCarbamidomethyl [C215]	0	2381.11	High	n/a	High		7.935e-06		4.747e-07	2.42
O88986	2-amino-3-ketobutyrate coenzyme A ligase, mitochondrial OS=Mus musculus OX=10090 GN=Gcat PE=1 SV=2	[R].FICGTQSIHK.[N]	1xCarbamidomethyl [C3]	0.000161717	3.46687e-05	1	1	1	13	O88986 [101-110]	O88986 1xCarbamidomethyl [C103]	0	1190.6	High	n/a	High		7.935e-06		1.373e-05	2.02
Q6PDY2	2-aminoethanethiol dioxygenase OS=Mus musculus OX=10090 GN=Ado PE=1 SV=2	[R].QACLTFR.[G]	1xCarbamidomethyl [C3]	0.0551749	0.00157669	1	1	1	2	Q6PDY2 [16-22]	Q6PDY2 1xCarbamidomethyl [C18]	0	895.445	High	n/a	High		0.0004444		0.006592	2.01
Q6PDY2	2-aminoethanethiol dioxygenase OS=Mus musculus OX=10090 GN=Ado PE=1 SV=2	[K].SGTCIPLHDHPGMHGMLK.[V]	1xCarbamidomethyl [C4]	1.58838e-05	3.46687e-05	1	1	1	1	Q6PDY2 [93-110]	Q6PDY2 1xCarbamidomethyl [C96]	0	1987.93	High	n/a	High		7.935e-06		1.188e-06	3.07
Q6PDY2	2-aminoethanethiol dioxygenase OS=Mus musculus OX=10090 GN=Ado PE=1 SV=2	[K].SGTCIPLHDHPGMHGMLK.[V]	1xCarbamidomethyl [C4]; 1xOxidation [M13]	0.000411215	3.46687e-05	1	1	1	1	Q6PDY2 [93-110]	Q6PDY2 1xCarbamidomethyl [C96]	0	2003.92	High	n/a	High		7.935e-06		3.66e-05	1.28
Q6PDY2	2-aminoethanethiol dioxygenase OS=Mus musculus OX=10090 GN=Ado PE=1 SV=2	[K].EASGSACDLPR.[E]	1xCarbamidomethyl [C7]	2.93359e-05	3.46687e-05	1	1	1	2	Q6PDY2 [219-229]	Q6PDY2 1xCarbamidomethyl [C225]	0	1162.52	High	n/a	High		7.935e-06		2.276e-06	2.61
Q9QXE0	2-hydroxyacyl-CoA lyase 1 OS=Mus musculus OX=10090 GN=Hacl1 PE=1 SV=2	[K].LVEQCSLPFLPTPMGK.[G]	1xCarbamidomethyl [C5]	2.88087e-06	3.46687e-05	1	1	1	2	Q9QXE0 [239-254]	Q9QXE0 1xCarbamidomethyl [C243]	0	1816.93	High	n/a	High		7.935e-06		1.969e-07	3.07
Q9QXE0	2-hydroxyacyl-CoA lyase 1 OS=Mus musculus OX=10090 GN=Hacl1 PE=1 SV=2	[K].TPWQCPPDSQWWK.[T]	1xCarbamidomethyl [C5]	1.15285e-06	3.46687e-05	1	1	1	1	Q9QXE0 [342-354]	Q9QXE0 1xCarbamidomethyl [C346]	0	1715.76	High	n/a	High		7.935e-06		7.488e-08	3.12
Q9QXE0	2-hydroxyacyl-CoA lyase 1 OS=Mus musculus OX=10090 GN=Hacl1 PE=1 SV=2	[K].LVEQCSLPFLPTPMGK.[G]	1xCarbamidomethyl [C5]; 1xOxidation [M14]	7.45964e-06	3.46687e-05	1	1	1	2	Q9QXE0 [239-254]	Q9QXE0 1xCarbamidomethyl [C243]	0	1832.93	High	n/a	High		7.935e-06		5.368e-07	2.33
Q9QXE0	2-hydroxyacyl-CoA lyase 1 OS=Mus musculus OX=10090 GN=Hacl1 PE=1 SV=2	[R].TMLQNCLPR.[H]	1xCarbamidomethyl [C6]	0.0139709	0.000508083	1	1	1	2	Q9QXE0 [410-418]	Q9QXE0 1xCarbamidomethyl [C415]	0	1132.56	High	n/a	High		0.0001348		0.001396	1.98
Q8BU33	2-hydroxyacyl-CoA lyase 2 OS=Mus musculus OX=10090 GN=Ilvbl PE=1 SV=1	[R].AAVETLGVPCFLGGMSR.[G]	1xCarbamidomethyl [C10]	4.7823e-06	3.46687e-05	1	3	1	6	Q8BU33 [306-322]	Q8BU33 1xCarbamidomethyl [C315]	0	1764.88	High	n/a	High		7.935e-06		3.369e-07	4.42
Q8BU33	2-hydroxyacyl-CoA lyase 2 OS=Mus musculus OX=10090 GN=Ilvbl PE=1 SV=1	[R].AAVETLGVPCFLGGMSR.[G]	1xCarbamidomethyl [C10]; 1xOxidation [M15]	8.75686e-05	3.46687e-05	1	3	1	3	Q8BU33 [306-322]	Q8BU33 1xCarbamidomethyl [C315]	0	1780.87	High	n/a	High		7.935e-06		7.226e-06	1.6
Q8BU33	2-hydroxyacyl-CoA lyase 2 OS=Mus musculus OX=10090 GN=Ilvbl PE=1 SV=1	[K].ADVVVLAGAVCDFR.[L]	1xCarbamidomethyl [C11]	2.05486e-06	3.46687e-05	1	3	1	14	Q8BU33 [344-357]	Q8BU33 1xCarbamidomethyl [C354]	0	1491.76	High	n/a	High		7.935e-06		1.373e-07	3.67
Q8BU33	2-hydroxyacyl-CoA lyase 2 OS=Mus musculus OX=10090 GN=Ilvbl PE=1 SV=1	[K].KADVVVLAGAVCDFR.[L]	1xCarbamidomethyl [C12]	2.03589e-07	3.46687e-05	1	3	1	2	Q8BU33 [343-357]	Q8BU33 1xCarbamidomethyl [C354]	1	1619.86	High	n/a	High		7.935e-06		1.206e-08	5.1
Q8BU33	2-hydroxyacyl-CoA lyase 2 OS=Mus musculus OX=10090 GN=Ilvbl PE=1 SV=1	[R].GALQAIDQMSLFRPLCK.[F]	1xCarbamidomethyl [C16]	8.59027e-09	3.46687e-05	1	3	1	6	Q8BU33 [158-174]	Q8BU33 1xCarbamidomethyl [C173]	0	1948.01	High	n/a	High		7.935e-06		4.277e-10	4.53
Q8BU33	2-hydroxyacyl-CoA lyase 2 OS=Mus musculus OX=10090 GN=Ilvbl PE=1 SV=1	[R].GALQAIDQMSLFRPLCK.[F]	1xCarbamidomethyl [C16]; 1xOxidation [M9]	3.96166e-10	3.46687e-05	1	3	1	2	Q8BU33 [158-174]	Q8BU33 1xCarbamidomethyl [C173]	0	1964.01	High	n/a	High		7.935e-06		1.657e-11	4.08
Q8BU33	2-hydroxyacyl-CoA lyase 2 OS=Mus musculus OX=10090 GN=Ilvbl PE=1 SV=1	[R].FVFTLVGGHISPLLVACEK.[L]	1xCarbamidomethyl [C17]	3.00722e-10	3.46687e-05	1	3	1	3	Q8BU33 [69-87]	Q8BU33 1xCarbamidomethyl [C85]	0	2087.14	High	n/a	High		7.935e-06		1.241e-11	4.84
Q8BU33	2-hydroxyacyl-CoA lyase 2 OS=Mus musculus OX=10090 GN=Ilvbl PE=1 SV=1	[R].EGQQLCQDGHAVVVNILIGRTDFRDGSISV.[-]	1xCarbamidomethyl [C6]	5.27369e-06	3.46687e-05	1	1	1	2	Q8BU33 [603-632]	Q8BU33 1xCarbamidomethyl [C608]	2	3283.65	High	n/a	High		7.935e-06		3.72e-07	5.14
Q8BU33	2-hydroxyacyl-CoA lyase 2 OS=Mus musculus OX=10090 GN=Ilvbl PE=1 SV=1	[R].EGQQLCQDGHAVVVNILIGR.[T]	1xCarbamidomethyl [C6]	1.25861e-09	3.46687e-05	1	1	1	9	Q8BU33 [603-622]	Q8BU33 1xCarbamidomethyl [C608]	0	2206.14	High	n/a	High		7.935e-06		5.639e-11	6.2
Q8BU33	2-hydroxyacyl-CoA lyase 2 OS=Mus musculus OX=10090 GN=Ilvbl PE=1 SV=1	[R].EGQQLCQDGHAVVVNILIGRTDFR.[D]	1xCarbamidomethyl [C6]	0.00543596	0.000289748	1	1	1	1	Q8BU33 [603-626]	Q8BU33 1xCarbamidomethyl [C608]	1	2725.38	High	n/a	High		7.049e-05		0.0005244	3.49
Q8BU33	2-hydroxyacyl-CoA lyase 2 OS=Mus musculus OX=10090 GN=Ilvbl PE=1 SV=1	[R].LGSDVACSLAYTDYHK.[A]	1xCarbamidomethyl [C7]	3.17567e-07	3.46687e-05	1	1	1	5	Q8BU33 [562-577]	Q8BU33 1xCarbamidomethyl [C568]	0	1799.83	High	n/a	High		7.935e-06		1.93e-08	4.22
Q8BU33	2-hydroxyacyl-CoA lyase 2 OS=Mus musculus OX=10090 GN=Ilvbl PE=1 SV=1	[R].GALQAIDQMSLFRPLCKFCASVR.[R]	2xCarbamidomethyl [C16; C19]; 1xOxidation [M9]	7.58771e-08	3.46687e-05	1	3	1	1	Q8BU33 [158-180]	Q8BU33 2xCarbamidomethyl [C173; C176]	1	2684.35	High	n/a	High		7.935e-06		4.224e-09	5.04
Q64676	2-hydroxyacylsphingosine 1-beta-galactosyltransferase OS=Mus musculus OX=10090 GN=Ugt8 PE=1 SV=2	[K].NCDMMVGNQALIQGLK.[K]	1xCarbamidomethyl [C2]; 1xOxidation [M5]	5.27369e-06	3.46687e-05	1	1	1	1	Q64676 [113-128]	Q64676 1xCarbamidomethyl [C114]	0	1807.85	High	n/a	High		7.935e-06		3.738e-07	2.22
P52760	2-iminobutanoate/2-iminopropanoate deaminase OS=Mus musculus OX=10090 GN=Rida PE=1 SV=3	[K].NLGEILKAAGCDFNNVVK.[T]	1xCarbamidomethyl [C11]	7.6613e-06	3.46687e-05	1	1	1	3	P52760 [61-78]	P52760 1xCarbamidomethyl [C71]	1	1962.01	High	n/a	High		7.935e-06		5.511e-07	2.78
P52760	2-iminobutanoate/2-iminopropanoate deaminase OS=Mus musculus OX=10090 GN=Rida PE=1 SV=3	[K].AAGCDFNNVVK.[T]	1xCarbamidomethyl [C4]	3.29306e-05	3.46687e-05	1	1	1	8	P52760 [68-78]	P52760 1xCarbamidomethyl [C71]	0	1194.56	High	n/a	High		7.935e-06		2.573e-06	1.52
Q7TME0	2-lysophosphatidate phosphatase PLPPR4 OS=Mus musculus OX=10090 GN=Plppr4 PE=1 SV=2	[K].ENSYIVEDICSGSDLTVINSGR.[K]	1xCarbamidomethyl [C10]	2.28098e-12	3.46687e-05	1	1	1	4	Q7TME0 [225-246]	Q7TME0 1xCarbamidomethyl [C234]	0	2428.13	High	n/a	High		7.935e-06		7.206e-14	5.76
Q7TME0	2-lysophosphatidate phosphatase PLPPR4 OS=Mus musculus OX=10090 GN=Plppr4 PE=1 SV=2	[R].GECDISGAGR.[L]	1xCarbamidomethyl [C3]	0.00604466	0.000314522	1	1	1	1	Q7TME0 [11-20]	Q7TME0 1xCarbamidomethyl [C13]	0	1021.44	High	n/a	High		7.473e-05		0.0005834	2.2
Q7TME0	2-lysophosphatidate phosphatase PLPPR4 OS=Mus musculus OX=10090 GN=Plppr4 PE=1 SV=2	[K].AAEKTVACNRSNNQPR.[I]	1xCarbamidomethyl [C8]	3.7923e-08	3.46687e-05	1	1	1	1	Q7TME0 [562-577]	Q7TME0 1xCarbamidomethyl [C569]	2	1815.89	High	n/a	High		7.935e-06		2.038e-09	3.66
Q7TME0	2-lysophosphatidate phosphatase PLPPR4 OS=Mus musculus OX=10090 GN=Plppr4 PE=1 SV=2	[K].NAEGSTVTCTGSIR.[Y]	1xCarbamidomethyl [C9]	1.35296e-06	3.46687e-05	1	1	1	4	Q7TME0 [597-610]	Q7TME0 1xCarbamidomethyl [C605]	0	1452.67	High	n/a	High		7.935e-06		8.88e-08	2.68
Q7TME0	2-lysophosphatidate phosphatase PLPPR4 OS=Mus musculus OX=10090 GN=Plppr4 PE=1 SV=2	[K].IQPGTVPGCNNSMPGGPR.[V]	1xCarbamidomethyl [C9]	5.97279e-06	3.46687e-05	1	1	1	3	Q7TME0 [506-523]	Q7TME0 1xCarbamidomethyl [C514]	0	1838.86	High	n/a	High		7.935e-06		4.263e-07	3.58
Q7TME0	2-lysophosphatidate phosphatase PLPPR4 OS=Mus musculus OX=10090 GN=Plppr4 PE=1 SV=2	[K].NAEGSTVTCTGSIRYKTLTDHEPSGIVR.[V]	1xCarbamidomethyl [C9]	0.136909	0.00447385	1	1	1	1	Q7TME0 [597-624]	Q7TME0 1xCarbamidomethyl [C605]	2	3049.5	High	n/a	High		0.00112		0.02225	2.35
Q7TME0	2-lysophosphatidate phosphatase PLPPR4 OS=Mus musculus OX=10090 GN=Plppr4 PE=1 SV=2	[K].IQPGTVPGCNNSMPGGPR.[V]	1xCarbamidomethyl [C9]; 1xOxidation [M13]	8.37373e-06	3.46687e-05	1	1	1	4	Q7TME0 [506-523]	Q7TME0 1xCarbamidomethyl [C514]	0	1854.86	High	n/a	High		7.935e-06		6.056e-07	1.71
Q9CXI0	2-methoxy-6-polyprenyl-1,4-benzoquinol methylase, mitochondrial OS=Mus musculus OX=10090 GN=Coq5 PE=1 SV=2	[R].VLKPGGRFLCLEFGQVNDPLISR.[L]	1xCarbamidomethyl [C10]	0.000329292	3.46687e-05	1	1	1	1	Q9CXI0 [235-257]	Q9CXI0 1xCarbamidomethyl [C244]	1	2615.41	High	n/a	High		7.935e-06		2.894e-05	2.35
Q9CXI0	2-methoxy-6-polyprenyl-1,4-benzoquinol methylase, mitochondrial OS=Mus musculus OX=10090 GN=Coq5 PE=1 SV=2	[K].YQNEEDSLGGSLATVCDINREMLK.[V]	1xCarbamidomethyl [C16]	2.82792e-08	3.46687e-05	1	1	1	1	Q9CXI0 [155-178]	Q9CXI0 1xCarbamidomethyl [C170]	1	2742.27	High	n/a	High		7.935e-06		1.496e-09	4.69
Q9CXI0	2-methoxy-6-polyprenyl-1,4-benzoquinol methylase, mitochondrial OS=Mus musculus OX=10090 GN=Coq5 PE=1 SV=2	[K].YQNEEDSLGGSLATVCDINR.[E]	1xCarbamidomethyl [C16]	1.81156e-10	3.46687e-05	1	1	1	2	Q9CXI0 [155-174]	Q9CXI0 1xCarbamidomethyl [C170]	0	2241.01	High	n/a	High		7.935e-06		7.268e-12	5.01
Q9CXI0	2-methoxy-6-polyprenyl-1,4-benzoquinol methylase, mitochondrial OS=Mus musculus OX=10090 GN=Coq5 PE=1 SV=2	[R].FLCLEFGQVNDPLISR.[L]	1xCarbamidomethyl [C3]	7.72973e-06	3.46687e-05	1	1	1	6	Q9CXI0 [242-257]	Q9CXI0 1xCarbamidomethyl [C244]	0	1907.97	High	n/a	High		7.935e-06		5.553e-07	4.32
Q6P3A8	2-oxoisovalerate dehydrogenase subunit beta, mitochondrial OS=Mus musculus OX=10090 GN=Bckdhb PE=1 SV=2	[R].TIVPWDVDTVCKSVIK.[T]	1xCarbamidomethyl [C11]	1.93086e-06	3.46687e-05	1	2	1	1	Q6P3A8 [304-319]	Q6P3A8 1xCarbamidomethyl [C314]	1	1859.99	High	n/a	High		7.935e-06		1.294e-07	2.8
Q6P3A8	2-oxoisovalerate dehydrogenase subunit beta, mitochondrial OS=Mus musculus OX=10090 GN=Bckdhb PE=1 SV=2	[R].TIVPWDVDTVCK.[S]	1xCarbamidomethyl [C11]	9.15491e-05	3.46687e-05	1	2	1	2	Q6P3A8 [304-315]	Q6P3A8 1xCarbamidomethyl [C314]	0	1432.71	High	n/a	High		7.935e-06		7.569e-06	3.19
Q6P3A8	2-oxoisovalerate dehydrogenase subunit beta, mitochondrial OS=Mus musculus OX=10090 GN=Bckdhb PE=1 SV=2	[R].LLISHEAPLTGGFASEISSTVQEECFLNLEAPISR.[V]	1xCarbamidomethyl [C25]	0.0220246	0.000779279	1	2	1	1	Q6P3A8 [323-357]	Q6P3A8 1xCarbamidomethyl [C347]	0	3815.92	High	n/a	High		0.0002131		0.009782	2.89
Q6P3A8	2-oxoisovalerate dehydrogenase subunit beta, mitochondrial OS=Mus musculus OX=10090 GN=Bckdhb PE=1 SV=2	[K].NPCIFFEPK.[I]	1xCarbamidomethyl [C3]	0.00158596	0.000136771	1	2	1	7	Q6P3A8 [231-239]	Q6P3A8 1xCarbamidomethyl [C233]	0	1151.56	High	n/a	High		2.796e-05		0.0001491	2.69
Q6P3A8	2-oxoisovalerate dehydrogenase subunit beta, mitochondrial OS=Mus musculus OX=10090 GN=Bckdhb PE=1 SV=2	[K].LGVSCEVIDLR.[T]	1xCarbamidomethyl [C5]	2.73217e-05	3.46687e-05	1	2	1	9	Q6P3A8 [293-303]	Q6P3A8 1xCarbamidomethyl [C297]	0	1260.66	High	n/a	High		7.935e-06		2.108e-06	2.25
Q6P3A8	2-oxoisovalerate dehydrogenase subunit beta, mitochondrial OS=Mus musculus OX=10090 GN=Bckdhb PE=1 SV=2	[K].GLLLSCIEDK.[N]	1xCarbamidomethyl [C6]	0.000694574	3.46687e-05	1	2	1	4	Q6P3A8 [221-230]	Q6P3A8 1xCarbamidomethyl [C226]	0	1147.6	High	n/a	High		7.935e-06		6.347e-05	2.75
Q6P3A8	2-oxoisovalerate dehydrogenase subunit beta, mitochondrial OS=Mus musculus OX=10090 GN=Bckdhb PE=1 SV=2	[R].SGDLFNCGSLTIR.[A]	1xCarbamidomethyl [C7]	7.79876e-06	3.46687e-05	1	2	1	7	Q6P3A8 [169-181]	Q6P3A8 1xCarbamidomethyl [C175]	0	1439.69	High	n/a	High		7.935e-06		5.61e-07	1.56
Q6P3A8	2-oxoisovalerate dehydrogenase subunit beta, mitochondrial OS=Mus musculus OX=10090 GN=Bckdhb PE=1 SV=2	[R].APWGCVGHGALYHSQSPEAFFAHCPGIK.[V]	2xCarbamidomethyl [C5; C24]	5.22302e-08	3.46687e-05	1	2	1	2	Q6P3A8 [182-209]	Q6P3A8 2xCarbamidomethyl [C186; C205]	0	3081.42	High	n/a	High		7.935e-06		2.856e-09	4.5
Q6P3A8	2-oxoisovalerate dehydrogenase subunit beta, mitochondrial OS=Mus musculus OX=10090 GN=Bckdhb PE=1 SV=2	[K].GLLLSCIEDKNPCIFFEPK.[I]	2xCarbamidomethyl [C6; C13]	2.83009e-06	3.46687e-05	1	2	1	7	Q6P3A8 [221-239]	Q6P3A8 2xCarbamidomethyl [C226; C233]	1	2280.14	High	n/a	High		7.935e-06		1.924e-07	3.39
Q8BHA9	2-phosphoxylose phosphatase 1 OS=Mus musculus OX=10090 GN=Pxylp1 PE=2 SV=1	[K].RPEIDCTLVASR.[K]	1xCarbamidomethyl [C6]	6.23717e-09	3.46687e-05	1	1	1	2	Q8BHA9 [111-122]	Q8BHA9 1xCarbamidomethyl [C116]	0	1416.73	High	n/a	High		7.935e-06		3.033e-10	4.09
Q9Z0S1	3'(2'),5'-bisphosphate nucleotidase 1 OS=Mus musculus OX=10090 GN=Bpnt1 PE=1 SV=2	[R].SHSNQLVTDCISAMNPDTVLR.[V]	1xCarbamidomethyl [C10]	5.07968e-11	3.46687e-05	1	1	1	8	Q9Z0S1 [197-217]	Q9Z0S1 1xCarbamidomethyl [C206]	0	2358.12	High	n/a	High		7.935e-06		1.902e-12	4.88
Q9Z0S1	3'(2'),5'-bisphosphate nucleotidase 1 OS=Mus musculus OX=10090 GN=Bpnt1 PE=1 SV=2	[R].SHSNQLVTDCISAMNPDTVLR.[V]	1xCarbamidomethyl [C10]; 1xOxidation [M14]	3.5939e-09	3.46687e-05	1	1	1	4	Q9Z0S1 [197-217]	Q9Z0S1 1xCarbamidomethyl [C206]	0	2374.11	High	n/a	High		7.935e-06		1.698e-10	4.07
Q9Z0S1	3'(2'),5'-bisphosphate nucleotidase 1 OS=Mus musculus OX=10090 GN=Bpnt1 PE=1 SV=2	[K].WDTCAPEVILHAVGGK.[L]	1xCarbamidomethyl [C4]	3.46965e-08	3.46687e-05	1	1	1	11	Q9Z0S1 [246-261]	Q9Z0S1 1xCarbamidomethyl [C249]	0	1752.87	High	n/a	High		7.935e-06		1.855e-09	3.86
Q9Z0S1	3'(2'),5'-bisphosphate nucleotidase 1 OS=Mus musculus OX=10090 GN=Bpnt1 PE=1 SV=2	[K].KWDTCAPEVILHAVGGK.[L]	1xCarbamidomethyl [C5]	9.55388e-10	3.46687e-05	1	1	1	5	Q9Z0S1 [245-261]	Q9Z0S1 1xCarbamidomethyl [C249]	1	1880.97	High	n/a	High		7.935e-06		4.192e-11	5.8
Q9Z0S1	3'(2'),5'-bisphosphate nucleotidase 1 OS=Mus musculus OX=10090 GN=Bpnt1 PE=1 SV=2	[R].LVQMSICSSLAR.[K]	1xCarbamidomethyl [C7]	5.36831e-06	3.46687e-05	1	1	1	23	Q9Z0S1 [53-64]	Q9Z0S1 1xCarbamidomethyl [C59]	0	1364.7	High	n/a	High		7.935e-06		3.81e-07	3.27
Q9Z0S1	3'(2'),5'-bisphosphate nucleotidase 1 OS=Mus musculus OX=10090 GN=Bpnt1 PE=1 SV=2	[K].AGTIVRCVIAEGDLGIVQK.[T]	1xCarbamidomethyl [C7]	8.37373e-06	3.46687e-05	1	1	1	3	Q9Z0S1 [22-40]	Q9Z0S1 1xCarbamidomethyl [C28]	1	1999.1	High	n/a	High		7.935e-06		6.044e-07	4.27
Q9Z0S1	3'(2'),5'-bisphosphate nucleotidase 1 OS=Mus musculus OX=10090 GN=Bpnt1 PE=1 SV=2	[R].LVQMSICSSLAR.[K]	1xCarbamidomethyl [C7]; 1xOxidation [M4]	1.36555e-05	3.46687e-05	1	1	1	11	Q9Z0S1 [53-64]	Q9Z0S1 1xCarbamidomethyl [C59]	0	1380.7	High	n/a	High		7.935e-06		1.019e-06	3.02
Q7TMF2	3'-5' exoribonuclease 1 OS=Mus musculus OX=10090 GN=Eri1 PE=1 SV=2	[K].FLSIQCR.[L]	1xCarbamidomethyl [C6]	0.0345569	0.00111723	1	1	1	1	Q7TMF2 [234-240]	Q7TMF2 1xCarbamidomethyl [C239]	0	923.477	High	n/a	High		0.0003292		0.003769	2.17
B2RR83	3'-5' RNA helicase YTHDC2 OS=Mus musculus OX=10090 GN=Ythdc2 PE=1 SV=1	[K].TTQIPQFLLDDCFK.[N]	1xCarbamidomethyl [C12]	9.31915e-05	3.46687e-05	1	1	1	2	B2RR83 [238-251]	B2RR83 1xCarbamidomethyl [C249]	0	1725.85	High	n/a	High		7.935e-06		7.67e-06	1.76
B2RR83	3'-5' RNA helicase YTHDC2 OS=Mus musculus OX=10090 GN=Ythdc2 PE=1 SV=1	[R].IFCTQPR.[R]	1xCarbamidomethyl [C3]	0.0183343	0.000674799	1	1	1	3	B2RR83 [258-264]	B2RR83 1xCarbamidomethyl [C260]	0	921.461	High	n/a	High		0.0001889		0.001867	1.58
B2RR83	3'-5' RNA helicase YTHDC2 OS=Mus musculus OX=10090 GN=Ythdc2 PE=1 SV=1	[K].MVLCAVVLK.[C]	1xCarbamidomethyl [C4]	8.91396e-05	3.46687e-05	1	1	1	6	B2RR83 [859-867]	B2RR83 1xCarbamidomethyl [C862]	0	1032.59	High	n/a	High		7.935e-06		7.36e-06	2.2
B2RR83	3'-5' RNA helicase YTHDC2 OS=Mus musculus OX=10090 GN=Ythdc2 PE=1 SV=1	[K].DVNCLEPWLIK.[E]	1xCarbamidomethyl [C4]	1.35346e-05	3.46687e-05	1	1	1	1	B2RR83 [472-482]	B2RR83 1xCarbamidomethyl [C475]	0	1386.71	High	n/a	High		7.935e-06		1.003e-06	2.1
B2RR83	3'-5' RNA helicase YTHDC2 OS=Mus musculus OX=10090 GN=Ythdc2 PE=1 SV=1	[K].MVLCAVVLK.[C]	1xCarbamidomethyl [C4]; 1xOxidation [M1]	2.01937e-05	3.46687e-05	1	1	1	2	B2RR83 [859-867]	B2RR83 1xCarbamidomethyl [C862]	0	1048.59	High	n/a	High		7.935e-06		1.531e-06	2.16
B2RR83	3'-5' RNA helicase YTHDC2 OS=Mus musculus OX=10090 GN=Ythdc2 PE=1 SV=1	[K].LLAPVNCTIADFLMK.[A]	1xCarbamidomethyl [C7]	4.49201e-07	3.46687e-05	1	1	1	1	B2RR83 [797-811]	B2RR83 1xCarbamidomethyl [C803]	0	1705.9	High	n/a	High		7.935e-06		2.781e-08	3.78
B2RR83	3'-5' RNA helicase YTHDC2 OS=Mus musculus OX=10090 GN=Ythdc2 PE=1 SV=1	[R].IANIRCCSAVTPVTVLVFCGPAR.[L]	3xCarbamidomethyl [C6; C7; C19]	4.85879e-11	3.46687e-05	1	1	1	3	B2RR83 [1061-1083]	B2RR83 3xCarbamidomethyl [C1066; C1067; C1079]	1	2561.31	High	n/a	High		7.935e-06		1.815e-12	4.95
Q99N96	39S ribosomal protein L1, mitochondrial OS=Mus musculus OX=10090 GN=Mrpl1 PE=1 SV=2	[K].IATLDMPSDQIAANLQAVINEVCK.[H]	1xCarbamidomethyl [C23]	6.69958e-08	3.46687e-05	1	1	1	4	Q99N96 [262-285]	Q99N96 1xCarbamidomethyl [C284]	0	2614.32	High	n/a	High		7.935e-06		3.726e-09	6.88
Q99N96	39S ribosomal protein L1, mitochondrial OS=Mus musculus OX=10090 GN=Mrpl1 PE=1 SV=2	[K].IATLDMPSDQIAANLQAVINEVCK.[H]	1xCarbamidomethyl [C23]; 1xOxidation [M6]	1.43819e-09	3.46687e-05	1	1	1	6	Q99N96 [262-285]	Q99N96 1xCarbamidomethyl [C284]	0	2630.32	High	n/a	High		7.935e-06		6.464e-11	5.73
Q3TBW2	39S ribosomal protein L10, mitochondrial OS=Mus musculus OX=10090 GN=Mrpl10 PE=1 SV=2	[K].SVPFLPLLGGCVDDTILSR.[Q]	1xCarbamidomethyl [C11]	6.07066e-10	3.46687e-05	1	1	1	14	Q3TBW2 [170-188]	Q3TBW2 1xCarbamidomethyl [C180]	0	2059.09	High	n/a	High		7.935e-06		2.608e-11	3.56
Q3TBW2	39S ribosomal protein L10, mitochondrial OS=Mus musculus OX=10090 GN=Mrpl10 PE=1 SV=2	[R].MIAVCQNVALSAEDK.[L]	1xCarbamidomethyl [C5]	0.000739129	3.46687e-05	1	1	1	1	Q3TBW2 [95-109]	Q3TBW2 1xCarbamidomethyl [C99]	0	1648.8	High	n/a	High		7.935e-06		6.768e-05	2.23
Q9CQF0	39S ribosomal protein L11, mitochondrial OS=Mus musculus OX=10090 GN=Mrpl11 PE=1 SV=1	[K].HVYEIACVK.[A]	1xCarbamidomethyl [C7]	2.83109e-05	3.46687e-05	1	1	1	2	Q9CQF0 [116-124]	Q9CQF0 1xCarbamidomethyl [C122]	0	1118.57	High	n/a	High		7.935e-06		2.202e-06	3.03
Q9CQF0	39S ribosomal protein L11, mitochondrial OS=Mus musculus OX=10090 GN=Mrpl11 PE=1 SV=1	[R].GVSINQFCKEFNEK.[T]	1xCarbamidomethyl [C8]	1.58779e-06	3.46687e-05	1	1	1	5	Q9CQF0 [43-56]	Q9CQF0 1xCarbamidomethyl [C50]	1	1699.81	High	n/a	High		7.935e-06		1.053e-07	3.92
Q9CQF0	39S ribosomal protein L11, mitochondrial OS=Mus musculus OX=10090 GN=Mrpl11 PE=1 SV=1	[R].GVSINQFCK.[E]	1xCarbamidomethyl [C8]	0.00563175	0.000289748	1	1	1	5	Q9CQF0 [43-51]	Q9CQF0 1xCarbamidomethyl [C50]	0	1052.52	High	n/a	High		7.049e-05		0.0005412	1.42
Q9D1P0	39S ribosomal protein L13, mitochondrial OS=Mus musculus OX=10090 GN=Mrpl13 PE=1 SV=1	[K].LQGLNKPVYHQLSDCGDHVVIINTR.[H]	1xCarbamidomethyl [C15]	2.18179e-12	3.46687e-05	1	1	1	10	Q9D1P0 [39-63]	Q9D1P0 1xCarbamidomethyl [C53]	0	2876.48	High	n/a	High		7.935e-06		6.862e-14	5.26
Q9CPR5	39S ribosomal protein L15, mitochondrial OS=Mus musculus OX=10090 GN=Mrpl15 PE=1 SV=1	[R].GCGTSLDLLR.[S]	1xCarbamidomethyl [C2]	0.00179571	0.000136771	1	2	1	2	Q9CPR5 [7-16]	Q9CPR5 1xCarbamidomethyl [C8]	0	1091.55	High	n/a	High		2.796e-05		0.0001683	1.5
Q9CPR5	39S ribosomal protein L15, mitochondrial OS=Mus musculus OX=10090 GN=Mrpl15 PE=1 SV=1	[R].SLEILCKPIPFFLR.[G]	1xCarbamidomethyl [C6]	1.36452e-07	3.46687e-05	1	1	1	4	Q9CPR5 [182-195]	Q9CPR5 1xCarbamidomethyl [C187]	0	1732.98	High	n/a	High		7.935e-06		7.883e-09	3.83
Q9CPR5	39S ribosomal protein L15, mitochondrial OS=Mus musculus OX=10090 GN=Mrpl15 PE=1 SV=1	[-].MAGTARGCGTSLDLLR.[S]	1xCarbamidomethyl [C8]; 1xMet-loss+Acetyl [N-Term]	3.29191e-06	3.46687e-05	1	2	1	1	Q9CPR5 [1-16]	Q9CPR5 1xCarbamidomethyl [C8]; 1xMet-loss+Acetyl [N-Term]	1	1589.81	High	n/a	High		0.0002131		4.697e-05	5.55
Q99N93	39S ribosomal protein L16, mitochondrial OS=Mus musculus OX=10090 GN=Mrpl16 PE=1 SV=1	[K].TGCLVVEMGGR.[C]	1xCarbamidomethyl [C3]	6.94954e-05	3.46687e-05	1	1	1	4	Q99N93 [156-166]	Q99N93 1xCarbamidomethyl [C158]	0	1178.57	High	n/a	High		7.935e-06		5.675e-06	3.04
Q99N93	39S ribosomal protein L16, mitochondrial OS=Mus musculus OX=10090 GN=Mrpl16 PE=1 SV=1	[K].TGCLVVEMGGR.[C]	1xCarbamidomethyl [C3]; 1xOxidation [M8]	8.67935e-05	3.46687e-05	1	1	1	3	Q99N93 [156-166]	Q99N93 1xCarbamidomethyl [C158]	0	1194.56	High	n/a	High		7.935e-06		7.174e-06	2.25
Q9CQL5	39S ribosomal protein L18, mitochondrial OS=Mus musculus OX=10090 GN=Mrpl18 PE=1 SV=1	[R].NVVACESIGR.[V]	1xCarbamidomethyl [C5]	0.000581515	3.46687e-05	1	1	1	5	Q9CQL5 [121-130]	Q9CQL5 1xCarbamidomethyl [C125]	0	1104.55	High	n/a	High		7.935e-06		5.271e-05	2.71
Q9D338	39S ribosomal protein L19, mitochondrial OS=Mus musculus OX=10090 GN=Mrpl19 PE=1 SV=1	[K].TSQFLGICIKR.[S]	1xCarbamidomethyl [C8]	1.70548e-05	3.46687e-05	1	1	1	3	Q9D338 [130-140]	Q9D338 1xCarbamidomethyl [C137]	1	1322.72	High	n/a	High		7.935e-06		1.281e-06	3.4
Q9D338	39S ribosomal protein L19, mitochondrial OS=Mus musculus OX=10090 GN=Mrpl19 PE=1 SV=1	[K].TSQFLGICIK.[R]	1xCarbamidomethyl [C8]	0.000386415	3.46687e-05	1	1	1	8	Q9D338 [130-139]	Q9D338 1xCarbamidomethyl [C137]	0	1166.62	High	n/a	High		7.935e-06		3.427e-05	1.5
Q9D773	39S ribosomal protein L2, mitochondrial OS=Mus musculus OX=10090 GN=Mrpl2 PE=1 SV=1	[R].YDPCRSADIALVAGGSR.[K]	1xCarbamidomethyl [C4]	2.32809e-05	3.46687e-05	1	1	1	3	Q9D773 [132-148]	Q9D773 1xCarbamidomethyl [C135]	1	1807.88	High	n/a	High		7.935e-06		1.793e-06	2.14
Q9D773	39S ribosomal protein L2, mitochondrial OS=Mus musculus OX=10090 GN=Mrpl2 PE=1 SV=1	[R].AAGTCGVLLRK.[V]	1xCarbamidomethyl [C5]	1.63132e-05	3.46687e-05	1	1	1	4	Q9D773 [210-220]	Q9D773 1xCarbamidomethyl [C214]	1	1145.65	High	n/a	High		7.935e-06		1.222e-06	2.88
Q9D773	39S ribosomal protein L2, mitochondrial OS=Mus musculus OX=10090 GN=Mrpl2 PE=1 SV=1	[R].AAGTCGVLLR.[K]	1xCarbamidomethyl [C5]	5.13654e-05	3.46687e-05	1	1	1	8	Q9D773 [210-219]	Q9D773 1xCarbamidomethyl [C214]	0	1017.55	High	n/a	High		7.935e-06		4.104e-06	1.33
Q9D773	39S ribosomal protein L2, mitochondrial OS=Mus musculus OX=10090 GN=Mrpl2 PE=1 SV=1	[R].QMQVLESCTATVGR.[V]	1xCarbamidomethyl [C8]	1.43929e-07	3.46687e-05	1	1	1	1	Q9D773 [234-247]	Q9D773 1xCarbamidomethyl [C241]	0	1579.76	High	n/a	High		7.935e-06		8.331e-09	4.35
Q9D773	39S ribosomal protein L2, mitochondrial OS=Mus musculus OX=10090 GN=Mrpl2 PE=1 SV=1	[R].QMQVLESCTATVGR.[V]	1xCarbamidomethyl [C8]; 1xOxidation [M2]	6.07766e-07	3.46687e-05	1	1	1	1	Q9D773 [234-247]	Q9D773 1xCarbamidomethyl [C241]	0	1595.75	High	n/a	High		7.935e-06		3.823e-08	4
Q9D773	39S ribosomal protein L2, mitochondrial OS=Mus musculus OX=10090 GN=Mrpl2 PE=1 SV=1	[K].VVVVRYDPCRSADIALVAGGSR.[K]	1xCarbamidomethyl [C9]	0.0140941	0.000508083	1	1	1	1	Q9D773 [127-148]	Q9D773 1xCarbamidomethyl [C135]	2	2360.25	High	n/a	High		0.0001348		0.001403	2.59
Q9CQL4	39S ribosomal protein L20, mitochondrial OS=Mus musculus OX=10090 GN=Mrpl20 PE=1 SV=1	[K].CQVELNR.[K]	1xCarbamidomethyl [C1]	0.0288305	0.000909004	1	1	1	1	Q9CQL4 [93-99]	Q9CQL4 1xCarbamidomethyl [C93]	0	918.446	High	n/a	High		0.0002643		0.003081	2.08
Q8BU88	39S ribosomal protein L22, mitochondrial OS=Mus musculus OX=10090 GN=Mrpl22 PE=1 SV=1	[K].VYCHYFVK.[L]	1xCarbamidomethyl [C3]	6.35833e-05	3.46687e-05	1	1	1	5	Q8BU88 [164-171]	Q8BU88 1xCarbamidomethyl [C166]	0	1115.53	High	n/a	High		7.935e-06		5.157e-06	2.9
Q8BU88	39S ribosomal protein L22, mitochondrial OS=Mus musculus OX=10090 GN=Mrpl22 PE=1 SV=1	[R].RPAEIYHCR.[R]	1xCarbamidomethyl [C8]	9.91492e-06	3.46687e-05	1	1	1	2	Q8BU88 [63-71]	Q8BU88 1xCarbamidomethyl [C70]	0	1201.59	High	n/a	High		7.935e-06		7.221e-07	4.21
Q8BU88	39S ribosomal protein L22, mitochondrial OS=Mus musculus OX=10090 GN=Mrpl22 PE=1 SV=1	[R].RPAEIYHCRR.[Q]	1xCarbamidomethyl [C8]	0.000150616	3.46687e-05	1	1	1	2	Q8BU88 [63-72]	Q8BU88 1xCarbamidomethyl [C70]	1	1357.69	High	n/a	High		7.935e-06		1.281e-05	2.88
Q9D1B9	39S ribosomal protein L28, mitochondrial OS=Mus musculus OX=10090 GN=Mrpl28 PE=1 SV=3	[R].LRQGICAR.[L]	1xCarbamidomethyl [C6]	0.00274858	0.000202726	1	1	1	4	Q9D1B9 [16-23]	Q9D1B9 1xCarbamidomethyl [C21]	1	973.536	High	n/a	High		4.09e-05		0.0002599	2.35
Q99N95	39S ribosomal protein L3, mitochondrial OS=Mus musculus OX=10090 GN=Mrpl3 PE=1 SV=1	[K].HAVTLLQVQDCHVLK.[Y]	1xCarbamidomethyl [C11]	2.20715e-05	3.46687e-05	1	1	1	6	Q99N95 [117-131]	Q99N95 1xCarbamidomethyl [C127]	0	1760.95	High	n/a	High		7.935e-06		1.68e-06	3.54
Q99N95	39S ribosomal protein L3, mitochondrial OS=Mus musculus OX=10090 GN=Mrpl3 PE=1 SV=1	[K].HAVTLLQVQDCHVLKYTPK.[E]	1xCarbamidomethyl [C11]	2.68306e-06	3.46687e-05	1	1	1	2	Q99N95 [117-135]	Q99N95 1xCarbamidomethyl [C127]	1	2250.21	High	n/a	High		7.935e-06		1.827e-07	3.22
Q99N95	39S ribosomal protein L3, mitochondrial OS=Mus musculus OX=10090 GN=Mrpl3 PE=1 SV=1	[K].DGQKHAVTLLQVQDCHVLKYTPK.[E]	1xCarbamidomethyl [C15]	0.000474039	3.46687e-05	1	1	1	1	Q99N95 [113-135]	Q99N95 1xCarbamidomethyl [C127]	2	2678.41	High	n/a	High		7.935e-06		4.238e-05	2.25
Q99N95	39S ribosomal protein L3, mitochondrial OS=Mus musculus OX=10090 GN=Mrpl3 PE=1 SV=1	[K].NCLVKIK.[D]	1xCarbamidomethyl [C2]	0.136909	0.00447385	1	1	1	1	Q99N95 [294-300]	Q99N95 1xCarbamidomethyl [C295]	1	874.518	High	n/a	High		0.001115		0.02214	1.6
Q9D7N6	39S ribosomal protein L30, mitochondrial OS=Mus musculus OX=10090 GN=Mrpl30 PE=1 SV=1	[K].LPQGLPTEETMSSTCLK.[S]	1xCarbamidomethyl [C15]; 1xOxidation [M11]	1.09254e-07	3.46687e-05	1	1	1	2	Q9D7N6 [124-140]	Q9D7N6 1xCarbamidomethyl [C138]	0	1907.91	High	n/a	High		7.935e-06		6.211e-09	2.44
Q9DCI9	39S ribosomal protein L32, mitochondrial OS=Mus musculus OX=10090 GN=Mrpl32 PE=1 SV=1	[K].HVLCGYCYEK.[V]	2xCarbamidomethyl [C4; C7]	1.75094e-06	3.46687e-05	1	1	1	2	Q9DCI9 [119-128]	Q9DCI9 2xCarbamidomethyl [C122; C125]	0	1328.58	High	n/a	High		7.935e-06		1.166e-07	3.62
Q9CQL6	39S ribosomal protein L35, mitochondrial OS=Mus musculus OX=10090 GN=Mrpl35 PE=2 SV=1	[R].EFVFCSK.[T]	1xCarbamidomethyl [C5]	0.0520192	0.00152429	1	1	1	1	Q9CQL6 [146-152]	Q9CQL6 1xCarbamidomethyl [C150]	0	916.423	High	n/a	High		0.0004295		0.006135	1.93
Q9CQL6	39S ribosomal protein L35, mitochondrial OS=Mus musculus OX=10090 GN=Mrpl35 PE=2 SV=1	[R].LREFVFCSKTQSK.[L]	1xCarbamidomethyl [C7]	8.08347e-05	3.46687e-05	1	1	1	2	Q9CQL6 [144-156]	Q9CQL6 1xCarbamidomethyl [C150]	2	1629.84	High	n/a	High		7.935e-06		6.633e-06	4.38
Q9CQL6	39S ribosomal protein L35, mitochondrial OS=Mus musculus OX=10090 GN=Mrpl35 PE=2 SV=1	[R].LREFVFCSK.[T]	1xCarbamidomethyl [C7]	0.000437606	3.46687e-05	1	1	1	4	Q9CQL6 [144-152]	Q9CQL6 1xCarbamidomethyl [C150]	1	1185.61	High	n/a	High		7.935e-06		3.922e-05	3.13
Q99N90	39S ribosomal protein L36, mitochondrial OS=Mus musculus OX=10090 GN=Mrpl36 PE=3 SV=1	[R].GRWFILCKTNPK.[H]	1xCarbamidomethyl [C7]	0.00220211	0.000136771	1	1	1	1	Q99N90 [85-96]	Q99N90 1xCarbamidomethyl [C91]	2	1519.82	High	n/a	High		2.796e-05		0.0002074	1.82
Q99N90	39S ribosomal protein L36, mitochondrial OS=Mus musculus OX=10090 GN=Mrpl36 PE=3 SV=1	[R].GRWFILCK.[T]	1xCarbamidomethyl [C7]	0.0273707	0.000883695	1	1	1	2	Q99N90 [85-92]	Q99N90 1xCarbamidomethyl [C91]	1	1079.58	High	n/a	High		0.0002541		0.002889	1.68
Q921S7	39S ribosomal protein L37, mitochondrial OS=Mus musculus OX=10090 GN=Mrpl37 PE=1 SV=1	[R].AAPIHEQTLYKEEPCYIFHQR.[C]	1xCarbamidomethyl [C15]	3.89912e-05	3.46687e-05	1	1	1	2	Q921S7 [90-110]	Q921S7 1xCarbamidomethyl [C104]	1	2630.28	High	n/a	High		7.935e-06		3.076e-06	2.85
Q921S7	39S ribosomal protein L37, mitochondrial OS=Mus musculus OX=10090 GN=Mrpl37 PE=1 SV=1	[R].SHVLETFYPISPTIDLQECHVYEVK.[D]	1xCarbamidomethyl [C19]	2.65727e-08	3.46687e-05	1	1	1	1	Q921S7 [250-274]	Q921S7 1xCarbamidomethyl [C268]	0	3004.48	High	n/a	High		7.935e-06		1.4e-09	4.32
Q921S7	39S ribosomal protein L37, mitochondrial OS=Mus musculus OX=10090 GN=Mrpl37 PE=1 SV=1	[K].EEPCYIFHQR.[C]	1xCarbamidomethyl [C4]	1.91446e-05	3.46687e-05	1	1	1	2	Q921S7 [101-110]	Q921S7 1xCarbamidomethyl [C104]	0	1378.62	High	n/a	High		7.935e-06		1.456e-06	2.06
Q921S7	39S ribosomal protein L37, mitochondrial OS=Mus musculus OX=10090 GN=Mrpl37 PE=1 SV=1	[R].HFWCRPVIK.[K]	1xCarbamidomethyl [C4]	0.00265282	0.000202726	1	1	1	4	Q921S7 [385-393]	Q921S7 1xCarbamidomethyl [C388]	0	1242.66	High	n/a	High		3.462e-05		0.0002515	1.02
Q921S7	39S ribosomal protein L37, mitochondrial OS=Mus musculus OX=10090 GN=Mrpl37 PE=1 SV=1	[R].ETYCPLIVDSLIQLCK.[S]	2xCarbamidomethyl [C4; C15]	9.47659e-08	3.46687e-05	1	1	1	5	Q921S7 [174-189]	Q921S7 2xCarbamidomethyl [C177; C188]	0	1951.99	High	n/a	High		7.935e-06		5.378e-09	3.92
Q921S7	39S ribosomal protein L37, mitochondrial OS=Mus musculus OX=10090 GN=Mrpl37 PE=1 SV=1	[R].ETYCPLIVDSLIQLCKSQILK.[H]	2xCarbamidomethyl [C4; C15]	0.000759088	7.02174e-05	1	1	1	1	Q921S7 [174-194]	Q921S7 2xCarbamidomethyl [C177; C188]	1	2521.34	High	n/a	High		1.496e-05		6.976e-05	2.11
Q921S7	39S ribosomal protein L37, mitochondrial OS=Mus musculus OX=10090 GN=Mrpl37 PE=1 SV=1	[K].RETYCPLIVDSLIQLCK.[S]	2xCarbamidomethyl [C5; C16]	2.16824e-05	3.46687e-05	1	1	1	2	Q921S7 [173-189]	Q921S7 2xCarbamidomethyl [C177; C188]	1	2108.09	High	n/a	High		7.935e-06		1.659e-06	4.66
Q8K2M0	39S ribosomal protein L38, mitochondrial OS=Mus musculus OX=10090 GN=Mrpl38 PE=1 SV=2	[R].HQEAMTPAGLAFFQCR.[W]	1xCarbamidomethyl [C15]	0.00145129	0.000136771	1	2	1	1	Q8K2M0 [307-322]	Q8K2M0 1xCarbamidomethyl [C321]	0	1863.86	High	n/a	High		2.796e-05		0.0001353	2.64
Q8K2M0	39S ribosomal protein L38, mitochondrial OS=Mus musculus OX=10090 GN=Mrpl38 PE=1 SV=2	[R].HQEAMTPAGLAFFQCR.[W]	1xCarbamidomethyl [C15]; 1xOxidation [M5]	3.1197e-07	3.46687e-05	1	2	1	2	Q8K2M0 [307-322]	Q8K2M0 1xCarbamidomethyl [C321]	0	1879.86	High	n/a	High		7.935e-06		1.895e-08	3.9
Q8K2M0	39S ribosomal protein L38, mitochondrial OS=Mus musculus OX=10090 GN=Mrpl38 PE=1 SV=2	[K].QDKPINFSEDTRPSPCYQLAQR.[T]	1xCarbamidomethyl [C16]	2.90103e-11	3.46687e-05	1	2	1	2	Q8K2M0 [275-296]	Q8K2M0 1xCarbamidomethyl [C290]	0	2650.27	High	n/a	High		7.935e-06		1.05e-12	5.18
Q8K2M0	39S ribosomal protein L38, mitochondrial OS=Mus musculus OX=10090 GN=Mrpl38 PE=1 SV=2	[R].TCGPYHK.[Q]	1xCarbamidomethyl [C2]	0.00371498	0.000259952	1	2	1	4	Q8K2M0 [142-148]	Q8K2M0 1xCarbamidomethyl [C143]	0	862.388	High	n/a	High		5.247e-05		0.0003534	1.17
Q8K2M0	39S ribosomal protein L38, mitochondrial OS=Mus musculus OX=10090 GN=Mrpl38 PE=1 SV=2	[R].AEWERTCGPYHK.[Q]	1xCarbamidomethyl [C7]	0.00249319	0.000170803	1	2	1	1	Q8K2M0 [137-148]	Q8K2M0 1xCarbamidomethyl [C143]	1	1533.69	High	n/a	High		3.462e-05		0.0002357	1.78
Q8K2M0	39S ribosomal protein L38, mitochondrial OS=Mus musculus OX=10090 GN=Mrpl38 PE=1 SV=2	[R].VAEGQETCPYLPPFPAR.[G]	1xCarbamidomethyl [C8]	2.34715e-07	3.46687e-05	1	2	1	6	Q8K2M0 [245-261]	Q8K2M0 1xCarbamidomethyl [C252]	0	1931.93	High	n/a	High		7.935e-06		1.393e-08	3.47
Q9JKF7	39S ribosomal protein L39, mitochondrial OS=Mus musculus OX=10090 GN=Mrpl39 PE=1 SV=4	[R].SCAMMLGCVIER.[A]	2xCarbamidomethyl [C2; C8]	1.89751e-05	3.46687e-05	1	1	1	6	Q9JKF7 [142-153]	Q9JKF7 2xCarbamidomethyl [C143; C149]	0	1426.63	High	n/a	High		7.935e-06		1.443e-06	2.8
Q9JKF7	39S ribosomal protein L39, mitochondrial OS=Mus musculus OX=10090 GN=Mrpl39 PE=1 SV=4	[R].SCAMMLGCVIER.[A]	2xCarbamidomethyl [C2; C8]; 1xOxidation [M4]	3.59803e-06	3.46687e-05	1	1	1	4	Q9JKF7 [142-153]	Q9JKF7 2xCarbamidomethyl [C143; C149]	0	1442.63	High	n/a	High		7.935e-06		2.49e-07	2.91
Q9DCU6	39S ribosomal protein L4, mitochondrial OS=Mus musculus OX=10090 GN=Mrpl4 PE=1 SV=1	[R].DSAGLLDPVLRKCELR.[I]	1xCarbamidomethyl [C13]	3.53583e-05	3.46687e-05	1	1	1	1	Q9DCU6 [39-54]	Q9DCU6 1xCarbamidomethyl [C51]	2	1841.99	High	n/a	High		7.935e-06		2.779e-06	4.29
Q9CY73	39S ribosomal protein L44, mitochondrial OS=Mus musculus OX=10090 GN=Mrpl44 PE=1 SV=3	[R].LLRCPPPPVR.[R]	1xCarbamidomethyl [C4]	0.000170577	3.46687e-05	1	2	1	3	Q9CY73 [50-59]	Q9CY73 1xCarbamidomethyl [C53]	1	1204.7	High	n/a	High		7.935e-06		1.452e-05	3.05
Q9CY73	39S ribosomal protein L44, mitochondrial OS=Mus musculus OX=10090 GN=Mrpl44 PE=1 SV=3	[K].TAFINSCYIK.[S]	1xCarbamidomethyl [C7]	0.000335197	3.46687e-05	1	2	1	4	Q9CY73 [90-99]	Q9CY73 1xCarbamidomethyl [C96]	0	1216.6	High	n/a	High		7.935e-06		2.962e-05	2.66
Q9D0Q7	39S ribosomal protein L45, mitochondrial OS=Mus musculus OX=10090 GN=Mrpl45 PE=1 SV=1	[R].LERPIHLACTAGIFDPYVPPEGDAR.[M]	1xCarbamidomethyl [C9]	1.90936e-12	3.46687e-05	1	1	1	10	Q9D0Q7 [72-96]	Q9D0Q7 1xCarbamidomethyl [C80]	0	2794.4	High	n/a	High		7.935e-06		5.931e-14	7.15
Q9D0Q7	39S ribosomal protein L45, mitochondrial OS=Mus musculus OX=10090 GN=Mrpl45 PE=1 SV=1	[R].LHTLVTEHCFPDMVWDLK.[Y]	1xCarbamidomethyl [C9]	4.25863e-07	3.46687e-05	1	1	1	3	Q9D0Q7 [160-177]	Q9D0Q7 1xCarbamidomethyl [C168]	0	2241.08	High	n/a	High		7.935e-06		2.63e-08	2.71
Q9D0Q7	39S ribosomal protein L45, mitochondrial OS=Mus musculus OX=10090 GN=Mrpl45 PE=1 SV=1	[R].LHTLVTEHCFPDMVWDLK.[Y]	1xCarbamidomethyl [C9]; 1xOxidation [M13]	8.22849e-05	3.46687e-05	1	1	1	1	Q9D0Q7 [160-177]	Q9D0Q7 1xCarbamidomethyl [C168]	0	2257.08	High	n/a	High		7.935e-06		6.784e-06	2.77
Q9EQI8	39S ribosomal protein L46, mitochondrial OS=Mus musculus OX=10090 GN=Mrpl46 PE=1 SV=1	[R].FLLDSDGLSCL.[-]	1xCarbamidomethyl [C10]	0.0840874	0.00271766	1	1	1	2	Q9EQI8 [273-283]	Q9EQI8 1xCarbamidomethyl [C282]	0	1239.59	High	n/a	High		0.0007293		0.01135	1.32
Q9EQI8	39S ribosomal protein L46, mitochondrial OS=Mus musculus OX=10090 GN=Mrpl46 PE=1 SV=1	[R].LSGALCLQRPPLITK.[A]	1xCarbamidomethyl [C6]	4.94787e-10	3.46687e-05	1	1	1	22	Q9EQI8 [45-59]	Q9EQI8 1xCarbamidomethyl [C50]	0	1666.97	High	n/a	High		7.935e-06		2.104e-11	5.56
Q9EQI8	39S ribosomal protein L46, mitochondrial OS=Mus musculus OX=10090 GN=Mrpl46 PE=1 SV=1	[K].FLGNAPCGHYK.[F]	1xCarbamidomethyl [C7]	5.97279e-06	3.46687e-05	1	1	1	12	Q9EQI8 [202-212]	Q9EQI8 1xCarbamidomethyl [C208]	0	1263.59	High	n/a	High		7.935e-06		4.253e-07	2.42
Q8K2Y7	39S ribosomal protein L47, mitochondrial OS=Mus musculus OX=10090 GN=Mrpl47 PE=1 SV=2	[K].SGASWTCQQLR.[N]	1xCarbamidomethyl [C7]	4.07638e-05	3.46687e-05	1	1	1	4	Q8K2Y7 [83-93]	Q8K2Y7 1xCarbamidomethyl [C89]	0	1293.6	High	n/a	High		7.935e-06		3.236e-06	1.7
Q8VDT9	39S ribosomal protein L50, mitochondrial OS=Mus musculus OX=10090 GN=Mrpl50 PE=1 SV=2	[K].EPVLVCPPLR.[S]	1xCarbamidomethyl [C6]	0.00064693	3.46687e-05	1	1	1	7	Q8VDT9 [48-57]	Q8VDT9 1xCarbamidomethyl [C53]	0	1179.66	High	n/a	High		7.935e-06		5.913e-05	2.68
Q8VDT9	39S ribosomal protein L50, mitochondrial OS=Mus musculus OX=10090 GN=Mrpl50 PE=1 SV=2	[K].KEPVLVCPPLR.[S]	1xCarbamidomethyl [C7]	0.000400397	3.46687e-05	1	1	1	12	Q8VDT9 [47-57]	Q8VDT9 1xCarbamidomethyl [C53]	1	1307.75	High	n/a	High		7.935e-06		3.575e-05	2.06
Q9D1H8	39S ribosomal protein L53, mitochondrial OS=Mus musculus OX=10090 GN=Mrpl53 PE=1 SV=1	[R].VQFCPFEK.[N]	1xCarbamidomethyl [C4]	0.0173963	0.000588561	1	1	1	6	Q9D1H8 [18-25]	Q9D1H8 1xCarbamidomethyl [C21]	0	1054.5	High	n/a	High		0.0001725		0.001757	1.44
Q9D1H8	39S ribosomal protein L53, mitochondrial OS=Mus musculus OX=10090 GN=Mrpl53 PE=1 SV=1	[R].ATNLNCSVIADVR.[H]	1xCarbamidomethyl [C6]	7.26328e-06	3.46687e-05	1	1	1	8	Q9D1H8 [44-56]	Q9D1H8 1xCarbamidomethyl [C49]	0	1432.72	High	n/a	High		7.935e-06		5.211e-07	2.3
Q9D1H8	39S ribosomal protein L53, mitochondrial OS=Mus musculus OX=10090 GN=Mrpl53 PE=1 SV=1	[R].HDGSEPCVDVLFGDGYR.[L]	1xCarbamidomethyl [C7]	1.3296e-05	3.46687e-05	1	1	1	2	Q9D1H8 [57-73]	Q9D1H8 1xCarbamidomethyl [C63]	0	1922.83	High	n/a	High		7.935e-06		9.9e-07	3
Q99N94	39S ribosomal protein L9, mitochondrial OS=Mus musculus OX=10090 GN=Mrpl9 PE=1 SV=2	[R].SCHLEVGMK.[N]	1xCarbamidomethyl [C2]	0.000245584	3.46687e-05	1	1	1	1	Q99N94 [166-174]	Q99N94 1xCarbamidomethyl [C167]	0	1060.49	High	n/a	High		7.935e-06		2.143e-05	1.2
Q99N94	39S ribosomal protein L9, mitochondrial OS=Mus musculus OX=10090 GN=Mrpl9 PE=1 SV=2	[R].SCHLEVGMK.[N]	1xCarbamidomethyl [C2]; 1xOxidation [M8]	7.73199e-05	3.46687e-05	1	1	1	1	Q99N94 [166-174]	Q99N94 1xCarbamidomethyl [C167]	0	1076.49	High	n/a	High		7.935e-06		6.311e-06	2.3
Q99N94	39S ribosomal protein L9, mitochondrial OS=Mus musculus OX=10090 GN=Mrpl9 PE=1 SV=2	[R].WGEYWCDVTVNGLDTVR.[V]	1xCarbamidomethyl [C6]	2.38834e-08	3.46687e-05	1	1	1	1	Q99N94 [213-229]	Q99N94 1xCarbamidomethyl [C218]	0	2069.94	High	n/a	High		7.935e-06		1.257e-09	3.62
Q8JZS7	3-hydroxy-3-methylglutaryl-CoA lyase, cytoplasmic OS=Mus musculus OX=10090 GN=Hmgcll1 PE=2 SV=1	[K].HCLNYQQLLR.[E]	1xCarbamidomethyl [C2]	4.22254e-06	3.46687e-05	1	1	1	5	Q8JZS7 [10-19]	Q8JZS7 1xCarbamidomethyl [C11]	0	1344.68	High	n/a	High		7.935e-06		2.936e-07	3.78
Q8JZS7	3-hydroxy-3-methylglutaryl-CoA lyase, cytoplasmic OS=Mus musculus OX=10090 GN=Hmgcll1 PE=2 SV=1	[K].VMEAGEFICK.[A]	1xCarbamidomethyl [C9]	0.000189779	3.46687e-05	1	1	1	2	Q8JZS7 [314-323]	Q8JZS7 1xCarbamidomethyl [C322]	0	1183.55	High	n/a	High		7.935e-06		1.634e-05	2.46
Q8JZS7	3-hydroxy-3-methylglutaryl-CoA lyase, cytoplasmic OS=Mus musculus OX=10090 GN=Hmgcll1 PE=2 SV=1	[K].VMEAGEFICK.[A]	1xCarbamidomethyl [C9]; 1xOxidation [M2]	0.000793556	7.02174e-05	1	1	1	1	Q8JZS7 [314-323]	Q8JZS7 1xCarbamidomethyl [C322]	0	1199.54	High	n/a	High		1.496e-05		7.276e-05	2.08
O08756	3-hydroxyacyl-CoA dehydrogenase type-2 OS=Mus musculus OX=10090 GN=Hsd17b10 PE=1 SV=4	[K].LGESCIFAPANVTSEK.[E]	1xCarbamidomethyl [C5]	1.75027e-07	3.46687e-05	1	1	1	12	O08756 [54-69]	O08756 1xCarbamidomethyl [C58]	0	1722.84	High	n/a	High		7.935e-06		1.022e-08	2.98
O08756	3-hydroxyacyl-CoA dehydrogenase type-2 OS=Mus musculus OX=10090 GN=Hsd17b10 PE=1 SV=4	[K].KLGESCIFAPANVTSEK.[E]	1xCarbamidomethyl [C6]	1.87787e-09	3.46687e-05	1	1	1	5	O08756 [53-69]	O08756 1xCarbamidomethyl [C58]	1	1850.93	High	n/a	High		7.935e-06		8.605e-11	4.12
O08756	3-hydroxyacyl-CoA dehydrogenase type-2 OS=Mus musculus OX=10090 GN=Hsd17b10 PE=1 SV=4	[R].IDVAVNCAGIAVAIK.[T]	1xCarbamidomethyl [C7]	5.04245e-07	3.46687e-05	1	1	1	20	O08756 [85-99]	O08756 1xCarbamidomethyl [C91]	0	1513.84	High	n/a	High		7.935e-06		3.119e-08	3.16
Q99L13	3-hydroxyisobutyrate dehydrogenase, mitochondrial OS=Mus musculus OX=10090 GN=Hibadh PE=1 SV=1	[K].HGYPLILYDVFPDVCK.[E]	1xCarbamidomethyl [C15]	4.21932e-08	3.46687e-05	1	1	1	7	Q99L13 [60-75]	Q99L13 1xCarbamidomethyl [C74]	0	1935.97	High	n/a	High		7.935e-06		2.288e-09	5.07
Q8QZS1	3-hydroxyisobutyryl-CoA hydrolase, mitochondrial OS=Mus musculus OX=10090 GN=Hibch PE=1 SV=1	[R].GCGGVITLNRPK.[F]	1xCarbamidomethyl [C2]	5.36831e-06	3.46687e-05	1	1	1	7	Q8QZS1 [43-54]	Q8QZS1 1xCarbamidomethyl [C44]	0	1271.69	High	n/a	High		7.935e-06		3.779e-07	3
Q8QZS1	3-hydroxyisobutyryl-CoA hydrolase, mitochondrial OS=Mus musculus OX=10090 GN=Hibch PE=1 SV=1	[K].AFCAGGDIK.[A]	1xCarbamidomethyl [C3]	0.000635538	3.46687e-05	1	1	1	8	Q8QZS1 [92-100]	Q8QZS1 1xCarbamidomethyl [C94]	0	938.44	High	n/a	High		7.935e-06		5.803e-05	1.76
Q8QZS1	3-hydroxyisobutyryl-CoA hydrolase, mitochondrial OS=Mus musculus OX=10090 GN=Hibch PE=1 SV=1	[R].RGCGGVITLNRPK.[F]	1xCarbamidomethyl [C3]	0.00244937	0.000170803	1	1	1	4	Q8QZS1 [42-54]	Q8QZS1 1xCarbamidomethyl [C44]	1	1427.79	High	n/a	High		3.462e-05		0.0002316	4.17
Q8QZS1	3-hydroxyisobutyryl-CoA hydrolase, mitochondrial OS=Mus musculus OX=10090 GN=Hibch PE=1 SV=1	[K].INSCFSANTVEQIIENLR.[Q]	1xCarbamidomethyl [C4]	1.17219e-09	3.46687e-05	1	1	1	4	Q8QZS1 [267-284]	Q8QZS1 1xCarbamidomethyl [C270]	0	2108.04	High	n/a	High		7.935e-06		5.23e-11	4.74
Q8QZS1	3-hydroxyisobutyryl-CoA hydrolase, mitochondrial OS=Mus musculus OX=10090 GN=Hibch PE=1 SV=1	[R].ITQACMEGHDFHEGVR.[A]	1xCarbamidomethyl [C5]	4.52691e-10	3.46687e-05	1	1	1	4	Q8QZS1 [331-346]	Q8QZS1 1xCarbamidomethyl [C335]	0	1886.83	High	n/a	High		7.935e-06		1.901e-11	5.41
Q8QZS1	3-hydroxyisobutyryl-CoA hydrolase, mitochondrial OS=Mus musculus OX=10090 GN=Hibch PE=1 SV=1	[K].GAGGKAFCAGGDIK.[A]	1xCarbamidomethyl [C8]	7.72973e-06	3.46687e-05	1	1	1	2	Q8QZS1 [87-100]	Q8QZS1 1xCarbamidomethyl [C94]	1	1308.64	High	n/a	High		7.935e-06		5.602e-07	3.14
Q921H8	3-ketoacyl-CoA thiolase A, peroxisomal OS=Mus musculus OX=10090 GN=Acaa1a PE=1 SV=1	[K].VNPLGGAIALGHPLGCTGAR.[Q]	1xCarbamidomethyl [C16]	1.18311e-08	3.46687e-05	1	2	1	13	Q921H8 [366-385]	Q921H8 1xCarbamidomethyl [C381]	0	1931.03	High	n/a	High		7.935e-06		5.999e-10	4.47
Q921H8	3-ketoacyl-CoA thiolase A, peroxisomal OS=Mus musculus OX=10090 GN=Acaa1a PE=1 SV=1	[R].QCSSGLQAVANIAGGIR.[N]	1xCarbamidomethyl [C2]	4.41283e-07	3.46687e-05	1	2	1	1	Q921H8 [122-138]	Q921H8 1xCarbamidomethyl [C123]	0	1701.87	High	n/a	High		7.935e-06		2.726e-08	5.12
Q921H8	3-ketoacyl-CoA thiolase A, peroxisomal OS=Mus musculus OX=10090 GN=Acaa1a PE=1 SV=1	[R].DCLTPMGMTSENVAER.[F]	1xCarbamidomethyl [C2]	3.23265e-07	3.46687e-05	1	1	1	1	Q921H8 [176-191]	Q921H8 1xCarbamidomethyl [C177]	0	1810.78	High	n/a	High		7.935e-06		1.959e-08	3.84
Q921H8	3-ketoacyl-CoA thiolase A, peroxisomal OS=Mus musculus OX=10090 GN=Acaa1a PE=1 SV=1	[K].ARDCLTPMGMTSENVAER.[F]	1xCarbamidomethyl [C4]; 1xOxidation [M10]	0.141116	0.00457106	1	1	1	1	Q921H8 [174-191]	Q921H8 1xCarbamidomethyl [C177]	1	2053.91	High	n/a	High		0.001157		0.02328	1.87
Q8BWT1	3-ketoacyl-CoA thiolase, mitochondrial OS=Mus musculus OX=10090 GN=Acaa2 PE=1 SV=3	[K].YNISREDCDRYALQSQQR.[W]	1xCarbamidomethyl [C8]	4.00165e-07	3.46687e-05	1	1	1	1	Q8BWT1 [172-189]	Q8BWT1 1xCarbamidomethyl [C179]	2	2302.06	High	n/a	High		7.935e-06		2.46e-08	4.72
Q8BWT1	3-ketoacyl-CoA thiolase, mitochondrial OS=Mus musculus OX=10090 GN=Acaa2 PE=1 SV=3	[R].VVGYFVSGCDPTIMGIGPVPAINGALK.[K]	1xCarbamidomethyl [C9]	8.36094e-10	3.46687e-05	1	1	1	2	Q8BWT1 [279-305]	Q8BWT1 1xCarbamidomethyl [C287]	0	2732.42	High	n/a	High		7.935e-06		3.653e-11	5.15
Q8BWT1	3-ketoacyl-CoA thiolase, mitochondrial OS=Mus musculus OX=10090 GN=Acaa2 PE=1 SV=3	[R].VVGYFVSGCDPTIMGIGPVPAINGALK.[K]	1xCarbamidomethyl [C9]; 1xOxidation [M14]	8.97736e-10	3.46687e-05	1	1	1	1	Q8BWT1 [279-305]	Q8BWT1 1xCarbamidomethyl [C287]	0	2748.41	High	n/a	High		7.935e-06		3.915e-11	4.49
Q8BWT1	3-ketoacyl-CoA thiolase, mitochondrial OS=Mus musculus OX=10090 GN=Acaa2 PE=1 SV=3	[R].VGVPTETGALTLNRLCGSGFQSIVSGCQEICSK.[D]	3xCarbamidomethyl [C16; C27; C31]	0.000635538	3.46687e-05	1	1	1	4	Q8BWT1 [77-109]	Q8BWT1 3xCarbamidomethyl [C92; C103; C107]	1	3525.71	High	n/a	High		0.0002131		0.001134	4.97
Q8BWT1	3-ketoacyl-CoA thiolase, mitochondrial OS=Mus musculus OX=10090 GN=Acaa2 PE=1 SV=3	[R].LCGSGFQSIVSGCQEICSK.[D]	3xCarbamidomethyl [C2; C13; C17]	1.03538e-08	3.46687e-05	1	1	1	16	Q8BWT1 [91-109]	Q8BWT1 3xCarbamidomethyl [C92; C103; C107]	0	2116.95	High	n/a	High		7.935e-06		5.168e-10	4.68
Q6GV12	3-ketodihydrosphingosine reductase OS=Mus musculus OX=10090 GN=Kdsr PE=1 SV=1	[K].LGPVDMLVNCAGTSMSGK.[F]	1xCarbamidomethyl [C10]	1.92789e-10	3.46687e-05	1	1	1	15	Q6GV12 [112-129]	Q6GV12 1xCarbamidomethyl [C121]	0	1836.87	High	n/a	High		7.935e-06		7.79e-12	4.14
Q6GV12	3-ketodihydrosphingosine reductase OS=Mus musculus OX=10090 GN=Kdsr PE=1 SV=1	[K].LGPVDMLVNCAGTSMSGK.[F]	1xCarbamidomethyl [C10]; 1xOxidation [M]	6.34664e-10	3.46687e-05	1	1	2	3	Q6GV12 [112-129]	Q6GV12 1xCarbamidomethyl [C121]	0	1852.86	High	n/a	High		7.935e-06		2.733e-11	3.41
Q6GV12	3-ketodihydrosphingosine reductase OS=Mus musculus OX=10090 GN=Kdsr PE=1 SV=1	[K].LGPVDMLVNCAGTSMSGK.[F]	1xCarbamidomethyl [C10]; 2xOxidation [M6; M15]	1.84619e-07	3.46687e-05	1	1	1	2	Q6GV12 [112-129]	Q6GV12 1xCarbamidomethyl [C121]	0	1868.86	High	n/a	High		7.935e-06		1.083e-08	2.37
Q6GV12	3-ketodihydrosphingosine reductase OS=Mus musculus OX=10090 GN=Kdsr PE=1 SV=1	[R].LISETTAICKPEQVAK.[Q]	1xCarbamidomethyl [C9]	6.12723e-09	3.46687e-05	1	1	1	14	Q6GV12 [237-252]	Q6GV12 1xCarbamidomethyl [C245]	0	1787.96	High	n/a	High		7.935e-06		2.975e-10	2.44
O88736	3-keto-steroid reductase/17-beta-hydroxysteroid dehydrogenase 7 OS=Mus musculus OX=10090 GN=Hsd17b7 PE=1 SV=1	[K].AFFCGIFSR.[N]	1xCarbamidomethyl [C4]	0.00191076	0.000136771	1	1	1	2	O88736 [103-111]	O88736 1xCarbamidomethyl [C106]	0	1104.53	High	n/a	High		2.796e-05		0.0001802	1.09
Q99J99	3-mercaptopyruvate sulfurtransferase OS=Mus musculus OX=10090 GN=Mpst PE=1 SV=4	[K].VDLSKPLVATCGSGVTACHVVLGAFLCGK.[S]	3xCarbamidomethyl [C11; C18; C27]	8.52397e-06	3.46687e-05	1	1	1	1	Q99J99 [238-266]	Q99J99 3xCarbamidomethyl [C248; C255; C264]	0	3016.54	High	n/a	High		7.935e-06		6.205e-07	2.4
Q9D404	3-oxoacyl-[acyl-carrier-protein] synthase, mitochondrial OS=Mus musculus OX=10090 GN=Oxsm PE=1 SV=1	[K].GPNHSVSTACTTGAHAVGDSFR.[F]	1xCarbamidomethyl [C10]	9.90741e-08	3.46687e-05	1	1	1	3	Q9D404 [200-221]	Q9D404 1xCarbamidomethyl [C209]	0	2229.01	High	n/a	High		7.935e-06		5.616e-09	2.82
Q9D404	3-oxoacyl-[acyl-carrier-protein] synthase, mitochondrial OS=Mus musculus OX=10090 GN=Oxsm PE=1 SV=1	[K].LACRPFHPER.[D]	1xCarbamidomethyl [C3]	0.000474039	3.46687e-05	1	1	1	6	Q9D404 [262-271]	Q9D404 1xCarbamidomethyl [C264]	0	1282.65	High	n/a	High		7.935e-06		4.263e-05	2.96
Q9D404	3-oxoacyl-[acyl-carrier-protein] synthase, mitochondrial OS=Mus musculus OX=10090 GN=Oxsm PE=1 SV=1	[K].NIPCSVAAYVPR.[G]	1xCarbamidomethyl [C4]	3.178e-05	3.46687e-05	1	1	1	3	Q9D404 [83-94]	Q9D404 1xCarbamidomethyl [C86]	0	1346.69	High	n/a	High		7.935e-06		2.484e-06	3
Q9D404	3-oxoacyl-[acyl-carrier-protein] synthase, mitochondrial OS=Mus musculus OX=10090 GN=Oxsm PE=1 SV=1	[R].DHACALAISSTK.[G]	1xCarbamidomethyl [C4]	2.05486e-06	3.46687e-05	1	1	1	1	Q9D404 [369-380]	Q9D404 1xCarbamidomethyl [C372]	0	1273.62	High	n/a	High		7.935e-06		1.373e-07	4.02
Q9D404	3-oxoacyl-[acyl-carrier-protein] synthase, mitochondrial OS=Mus musculus OX=10090 GN=Oxsm PE=1 SV=1	[R].LFRDHACALAISSTK.[G]	1xCarbamidomethyl [C7]	6.12959e-08	3.46687e-05	1	1	1	1	Q9D404 [366-380]	Q9D404 1xCarbamidomethyl [C372]	1	1689.87	High	n/a	High		7.935e-06		3.4e-09	3.92
Q9Z2A0	3-phosphoinositide-dependent protein kinase 1 OS=Mus musculus OX=10090 GN=Pdpk1 PE=1 SV=2	[K].IGSFDETCTR.[F]	1xCarbamidomethyl [C8]	0.000759088	7.02174e-05	1	1	1	1	Q9Z2A0 [177-186]	Q9Z2A0 1xCarbamidomethyl [C184]	0	1185.52	High	n/a	High		7.935e-06		6.937e-05	3.51
Q00558	40-kDa huntingtin-associated protein OS=Mus musculus OX=10090 GN=F8a1 PE=1 SV=1	[R].AQECLPYAAWCQLAVAR.[C]	2xCarbamidomethyl [C4; C11]	4.53536e-05	3.46687e-05	1	1	1	1	Q00558 [59-75]	Q00558 2xCarbamidomethyl [C62; C69]	0	2006.96	High	n/a	High		7.935e-06		3.613e-06	3.01
P62281	40S ribosomal protein S11 OS=Mus musculus OX=10090 GN=Rps11 PE=1 SV=3	[K].CPFTGNVSIR.[G]	1xCarbamidomethyl [C1]	0.000551329	3.46687e-05	1	1	1	4	P62281 [60-69]	P62281 1xCarbamidomethyl [C60]	0	1150.57	High	n/a	High		7.935e-06		4.995e-05	1.91
P62281	40S ribosomal protein S11 OS=Mus musculus OX=10090 GN=Rps11 PE=1 SV=3	[K].EAIEGTYIDKKCPFTGNVSIR.[G]	1xCarbamidomethyl [C12]	1.89464e-09	3.46687e-05	1	1	1	8	P62281 [49-69]	P62281 1xCarbamidomethyl [C60]	2	2398.21	High	n/a	High		7.935e-06		8.636e-11	5.5
P62281	40S ribosomal protein S11 OS=Mus musculus OX=10090 GN=Rps11 PE=1 SV=3	[R].DVQIGDIVTVGECRPLSK.[T]	1xCarbamidomethyl [C13]	5.17281e-10	3.46687e-05	1	1	1	27	P62281 [119-136]	P62281 1xCarbamidomethyl [C131]	0	1986.03	High	n/a	High		7.935e-06		2.203e-11	4.48
P62281	40S ribosomal protein S11 OS=Mus musculus OX=10090 GN=Rps11 PE=1 SV=3	[R].DVQIGDIVTVGECRPLSKTVR.[F]	1xCarbamidomethyl [C13]	1.03578e-07	3.46687e-05	1	1	1	2	P62281 [119-139]	P62281 1xCarbamidomethyl [C131]	1	2342.25	High	n/a	High		7.935e-06		5.901e-09	5.88
P62281	40S ribosomal protein S11 OS=Mus musculus OX=10090 GN=Rps11 PE=1 SV=3	[K].KCPFTGNVSIR.[G]	1xCarbamidomethyl [C2]	0.00110219	7.02174e-05	1	1	1	9	P62281 [59-69]	P62281 1xCarbamidomethyl [C60]	1	1278.66	High	n/a	High		1.496e-05		0.0001018	2.16
P62281	40S ribosomal protein S11 OS=Mus musculus OX=10090 GN=Rps11 PE=1 SV=3	[K].NMSVHLSPCFR.[D]	1xCarbamidomethyl [C9]	2.43306e-06	3.46687e-05	1	1	1	49	P62281 [108-118]	P62281 1xCarbamidomethyl [C116]	0	1347.63	High	n/a	High		7.935e-06		1.643e-07	3.07
P62281	40S ribosomal protein S11 OS=Mus musculus OX=10090 GN=Rps11 PE=1 SV=3	[K].NMSVHLSPCFR.[D]	1xCarbamidomethyl [C9]; 1xOxidation [M2]	4.53385e-06	3.46687e-05	1	1	1	47	P62281 [108-118]	P62281 1xCarbamidomethyl [C116]	0	1363.62	High	n/a	High		7.935e-06		3.163e-07	2.25
P62281	40S ribosomal protein S11 OS=Mus musculus OX=10090 GN=Rps11 PE=1 SV=3	[K].NMSVHLSPCFRDVQIGDIVTVGECRPLSK.[T]	2xCarbamidomethyl [C9; C24]	4.77498e-10	3.46687e-05	1	1	1	4	P62281 [108-136]	P62281 2xCarbamidomethyl [C116; C131]	1	3314.64	High	n/a	High		7.935e-06		2.023e-11	6.31
P62281	40S ribosomal protein S11 OS=Mus musculus OX=10090 GN=Rps11 PE=1 SV=3	[K].NMSVHLSPCFRDVQIGDIVTVGECRPLSK.[T]	2xCarbamidomethyl [C9; C24]; 1xOxidation [M2]	1.61442e-09	3.46687e-05	1	1	1	2	P62281 [108-136]	P62281 2xCarbamidomethyl [C116; C131]	1	3330.64	High	n/a	High		7.935e-06		7.285e-11	6.06
P63323	40S ribosomal protein S12 OS=Mus musculus OX=10090 GN=Rps12 PE=1 SV=2	[K].LGEWVGLCKIDREGKPR.[K]	1xCarbamidomethyl [C8]	3.89183e-10	3.46687e-05	1	1	1	4	P63323 [85-101]	P63323 1xCarbamidomethyl [C92]	2	2013.07	High	n/a	High		7.935e-06		1.63e-11	3.71
P63323	40S ribosomal protein S12 OS=Mus musculus OX=10090 GN=Rps12 PE=1 SV=2	[K].LGEWVGLCKIDR.[E]	1xCarbamidomethyl [C8]	8.74777e-08	3.46687e-05	1	1	1	17	P63323 [85-96]	P63323 1xCarbamidomethyl [C92]	1	1445.76	High	n/a	High		7.935e-06		4.92e-09	3.55
P63323	40S ribosomal protein S12 OS=Mus musculus OX=10090 GN=Rps12 PE=1 SV=2	[K].LGEWVGLCK.[I]	1xCarbamidomethyl [C8]	0.000175187	3.46687e-05	1	1	1	23	P63323 [85-93]	P63323 1xCarbamidomethyl [C92]	0	1061.54	High	n/a	High		7.935e-06		1.493e-05	1.06
P63323	40S ribosomal protein S12 OS=Mus musculus OX=10090 GN=Rps12 PE=1 SV=2	[K].DVIEEYFKCKK.[-]	1xCarbamidomethyl [C9]	1.30617e-05	3.46687e-05	1	1	1	5	P63323 [122-132]	P63323 1xCarbamidomethyl [C130]	2	1458.73	High	n/a	High		7.935e-06		9.741e-07	2.98
P63323	40S ribosomal protein S12 OS=Mus musculus OX=10090 GN=Rps12 PE=1 SV=2	[K].KLGEWVGLCKIDR.[E]	1xCarbamidomethyl [C9]	7.13257e-07	3.46687e-05	1	1	1	6	P63323 [84-96]	P63323 1xCarbamidomethyl [C92]	2	1573.85	High	n/a	High		7.935e-06		4.514e-08	5.8
P63323	40S ribosomal protein S12 OS=Mus musculus OX=10090 GN=Rps12 PE=1 SV=2	[K].KLGEWVGLCK.[I]	1xCarbamidomethyl [C9]	0.000117426	3.46687e-05	1	1	1	6	P63323 [84-93]	P63323 1xCarbamidomethyl [C92]	1	1189.64	High	n/a	High		7.935e-06		9.849e-06	4.35
P63323	40S ribosomal protein S12 OS=Mus musculus OX=10090 GN=Rps12 PE=1 SV=2	[K].DVIEEYFKCK.[K]	1xCarbamidomethyl [C9]	0.00238507	0.000136771	1	1	1	2	P63323 [122-131]	P63323 1xCarbamidomethyl [C130]	1	1330.63	High	n/a	High		2.796e-05		0.0002247	2.74
P63323	40S ribosomal protein S12 OS=Mus musculus OX=10090 GN=Rps12 PE=1 SV=2	[K].ALDKRQAHLCVLASNCDEPMYVK.[L]	2xCarbamidomethyl [C10; C16]	7.52054e-08	3.46687e-05	1	1	1	2	P63323 [41-63]	P63323 2xCarbamidomethyl [C50; C56]	2	2718.32	High	n/a	High		7.935e-06		4.221e-09	5.97
P63323	40S ribosomal protein S12 OS=Mus musculus OX=10090 GN=Rps12 PE=1 SV=2	[K].VVGCSCVVVKDYGK.[E]	2xCarbamidomethyl [C4; C6]	8.15024e-07	3.46687e-05	1	1	1	8	P63323 [103-116]	P63323 2xCarbamidomethyl [C106; C108]	1	1569.78	High	n/a	High		7.935e-06		5.19e-08	2.46
P63323	40S ribosomal protein S12 OS=Mus musculus OX=10090 GN=Rps12 PE=1 SV=2	[K].VVGCSCVVVK.[D]	2xCarbamidomethyl [C4; C6]	1.36555e-05	3.46687e-05	1	1	1	58	P63323 [103-112]	P63323 2xCarbamidomethyl [C106; C108]	0	1106.57	High	n/a	High		7.935e-06		1.017e-06	1.8
P63323	40S ribosomal protein S12 OS=Mus musculus OX=10090 GN=Rps12 PE=1 SV=2	[R].QAHLCVLASNCDEPMYVK.[L]	2xCarbamidomethyl [C5; C11]	3.06353e-08	3.46687e-05	1	1	1	3	P63323 [46-63]	P63323 2xCarbamidomethyl [C50; C56]	0	2134.97	High	n/a	High		7.935e-06		1.628e-09	6.03
P63323	40S ribosomal protein S12 OS=Mus musculus OX=10090 GN=Rps12 PE=1 SV=2	[R].QAHLCVLASNCDEPMYVK.[L]	2xCarbamidomethyl [C5; C11]; 1xOxidation [M15]	4.5726e-07	3.46687e-05	1	1	1	3	P63323 [46-63]	P63323 2xCarbamidomethyl [C50; C56]	0	2150.97	High	n/a	High		7.935e-06		2.823e-08	5.17
P63323	40S ribosomal protein S12 OS=Mus musculus OX=10090 GN=Rps12 PE=1 SV=2	[R].KVVGCSCVVVKDYGK.[E]	2xCarbamidomethyl [C5; C7]	1.91303e-07	3.46687e-05	1	1	1	25	P63323 [102-116]	P63323 2xCarbamidomethyl [C106; C108]	2	1697.87	High	n/a	High		7.935e-06		1.129e-08	3.02
P63323	40S ribosomal protein S12 OS=Mus musculus OX=10090 GN=Rps12 PE=1 SV=2	[R].KVVGCSCVVVK.[D]	2xCarbamidomethyl [C5; C7]	5.32079e-06	3.46687e-05	1	1	1	35	P63323 [102-112]	P63323 2xCarbamidomethyl [C106; C108]	1	1234.66	High	n/a	High		7.935e-06		3.764e-07	3.63
P62264	40S ribosomal protein S14 OS=Mus musculus OX=10090 GN=Rps14 PE=1 SV=3	[R].CKELGITALHIKLR.[A]	1xCarbamidomethyl [C1]	3.34713e-09	3.46687e-05	1	1	1	3	P62264 [85-98]	P62264 1xCarbamidomethyl [C85]	2	1651.97	High	n/a	High		7.935e-06		1.573e-10	5.73
P62264	40S ribosomal protein S14 OS=Mus musculus OX=10090 GN=Rps14 PE=1 SV=3	[R].CKELGITALHIK.[L]	1xCarbamidomethyl [C1]	1.70485e-06	3.46687e-05	1	1	1	5	P62264 [85-96]	P62264 1xCarbamidomethyl [C85]	1	1382.78	High	n/a	High		7.935e-06		1.13e-07	3.56
P62264	40S ribosomal protein S14 OS=Mus musculus OX=10090 GN=Rps14 PE=1 SV=3	[R].DESSPYAAMLAAQDVAQRCKELGITALHIK.[L]	1xCarbamidomethyl [C19]	1.50357e-09	3.46687e-05	1	1	1	3	P62264 [67-96]	P62264 1xCarbamidomethyl [C85]	2	3286.66	High	n/a	High		7.935e-06		6.765e-11	7.28
P62264	40S ribosomal protein S14 OS=Mus musculus OX=10090 GN=Rps14 PE=1 SV=3	[R].DESSPYAAMLAAQDVAQRCKELGITALHIK.[L]	1xCarbamidomethyl [C19]; 1xOxidation [M9]	1.04463e-08	3.46687e-05	1	1	1	1	P62264 [67-96]	P62264 1xCarbamidomethyl [C85]	2	3302.65	High	n/a	High		7.935e-06		5.257e-10	3.86
P62264	40S ribosomal protein S14 OS=Mus musculus OX=10090 GN=Rps14 PE=1 SV=3	[K].EEQVISLGPQVAEGENVFGVCHIFASFNDTFVHVTDLSGK.[E]	1xCarbamidomethyl [C21]	1.56038e-05	3.46687e-05	1	1	1	1	P62264 [11-50]	P62264 1xCarbamidomethyl [C31]	0	4377.11	High	n/a	High		0.0002131		0.0001206	4.28
P62264	40S ribosomal protein S14 OS=Mus musculus OX=10090 GN=Rps14 PE=1 SV=3	[K].ETICRVTGGMK.[V]	1xCarbamidomethyl [C4]	3.7952e-06	3.46687e-05	1	1	1	3	P62264 [51-61]	P62264 1xCarbamidomethyl [C54]	1	1251.62	High	n/a	High		7.935e-06		2.637e-07	4.42
P62264	40S ribosomal protein S14 OS=Mus musculus OX=10090 GN=Rps14 PE=1 SV=3	[K].ETICRVTGGMK.[V]	1xCarbamidomethyl [C4]; 1xOxidation [M10]	0.000320628	3.46687e-05	1	1	1	1	P62264 [51-61]	P62264 1xCarbamidomethyl [C54]	1	1267.61	High	n/a	High		7.935e-06		2.832e-05	3.05
P62245	40S ribosomal protein S15a OS=Mus musculus OX=10090 GN=Rps15a PE=1 SV=2	[K].CGVISPR.[F]	1xCarbamidomethyl [C1]	0.00891617	0.000366757	1	1	1	15	P62245 [72-78]	P62245 1xCarbamidomethyl [C72]	0	788.408	High	n/a	High		8.513e-05		0.0008723	1.26
P62245	40S ribosomal protein S15a OS=Mus musculus OX=10090 GN=Rps15a PE=1 SV=2	[K].IVVNLTGRLNKCGVISPR.[F]	1xCarbamidomethyl [C12]	7.52054e-08	3.46687e-05	1	1	1	6	P62245 [61-78]	P62245 1xCarbamidomethyl [C72]	2	1996.15	High	n/a	High		7.935e-06		4.211e-09	2.98
P62245	40S ribosomal protein S15a OS=Mus musculus OX=10090 GN=Rps15a PE=1 SV=2	[R].LNKCGVISPR.[F]	1xCarbamidomethyl [C4]	0.000207422	3.46687e-05	1	1	1	37	P62245 [69-78]	P62245 1xCarbamidomethyl [C72]	1	1143.63	High	n/a	High		7.935e-06		1.785e-05	2.33
P62245	40S ribosomal protein S15a OS=Mus musculus OX=10090 GN=Rps15a PE=1 SV=2	[R].QVLIRPCSKVIVR.[F]	1xCarbamidomethyl [C7]	1.88003e-06	3.46687e-05	1	1	1	6	P62245 [24-36]	P62245 1xCarbamidomethyl [C30]	1	1567.95	High	n/a	High		7.935e-06		1.258e-07	3.44
P62245	40S ribosomal protein S15a OS=Mus musculus OX=10090 GN=Rps15a PE=1 SV=2	[R].QVLIRPCSK.[V]	1xCarbamidomethyl [C7]	3.96908e-05	3.46687e-05	1	1	1	30	P62245 [24-32]	P62245 1xCarbamidomethyl [C30]	0	1100.62	High	n/a	High		7.935e-06		3.134e-06	2.66
P14131	40S ribosomal protein S16 OS=Mus musculus OX=10090 GN=Rps16 PE=1 SV=4	[R].TLLVADPRRCESK.[K]	1xCarbamidomethyl [C10]	0.000739129	3.46687e-05	1	1	1	3	P14131 [118-130]	P14131 1xCarbamidomethyl [C127]	2	1544.82	High	n/a	High		7.935e-06		6.752e-05	1.35
P14131	40S ribosomal protein S16 OS=Mus musculus OX=10090 GN=Rps16 PE=1 SV=4	[R].KKTATAVAHCK.[R]	1xCarbamidomethyl [C10]	9.91492e-06	3.46687e-05	1	1	1	25	P14131 [16-26]	P14131 1xCarbamidomethyl [C25]	2	1214.67	High	n/a	High		7.935e-06		7.251e-07	2.35
P14131	40S ribosomal protein S16 OS=Mus musculus OX=10090 GN=Rps16 PE=1 SV=4	[K].TATAVAHCKR.[G]	1xCarbamidomethyl [C8]	6.2953e-08	3.46687e-05	1	1	1	23	P14131 [18-27]	P14131 1xCarbamidomethyl [C25]	1	1114.58	High	n/a	High		7.935e-06		3.483e-09	2.26
P14131	40S ribosomal protein S16 OS=Mus musculus OX=10090 GN=Rps16 PE=1 SV=4	[K].TATAVAHCK.[R]	1xCarbamidomethyl [C8]	9.91755e-05	3.46687e-05	1	1	1	12	P14131 [18-26]	P14131 1xCarbamidomethyl [C25]	0	958.477	High	n/a	High		7.935e-06		8.234e-06	2.17
P14131	40S ribosomal protein S16 OS=Mus musculus OX=10090 GN=Rps16 PE=1 SV=4	[K].TATAVAHCKRGNGLIK.[V]	1xCarbamidomethyl [C8]	2.36811e-07	3.46687e-05	1	1	1	4	P14131 [18-33]	P14131 1xCarbamidomethyl [C25]	2	1696.93	High	n/a	High		7.935e-06		1.407e-08	4.96
P14131	40S ribosomal protein S16 OS=Mus musculus OX=10090 GN=Rps16 PE=1 SV=4	[K].KTATAVAHCKR.[G]	1xCarbamidomethyl [C9]	5.04436e-06	3.46687e-05	1	1	1	2	P14131 [17-27]	P14131 1xCarbamidomethyl [C25]	2	1242.67	High	n/a	High		7.935e-06		3.557e-07	2.21
P63276	40S ribosomal protein S17 OS=Mus musculus OX=10090 GN=Rps17 PE=1 SV=2	[R].LGNDFHTNKRVCEEIAIIPSK.[K]	1xCarbamidomethyl [C12]	0.000457487	3.46687e-05	1	1	1	2	P63276 [24-44]	P63276 1xCarbamidomethyl [C35]	2	2441.26	High	n/a	High		7.935e-06		4.107e-05	3.99
P63276	40S ribosomal protein S17 OS=Mus musculus OX=10090 GN=Rps17 PE=1 SV=2	[R].VCEEIAIIPSKK.[L]	1xCarbamidomethyl [C2]	2.98623e-05	3.46687e-05	1	1	1	2	P63276 [34-45]	P63276 1xCarbamidomethyl [C35]	1	1386.77	High	n/a	High		7.935e-06		2.328e-06	2.34
P63276	40S ribosomal protein S17 OS=Mus musculus OX=10090 GN=Rps17 PE=1 SV=2	[R].VCEEIAIIPSK.[K]	1xCarbamidomethyl [C2]	0.000103684	3.46687e-05	1	1	1	13	P63276 [34-44]	P63276 1xCarbamidomethyl [C35]	0	1258.67	High	n/a	High		7.935e-06		8.629e-06	3.06
P63276	40S ribosomal protein S17 OS=Mus musculus OX=10090 GN=Rps17 PE=1 SV=2	[K].RVCEEIAIIPSKK.[L]	1xCarbamidomethyl [C3]	0.000278127	3.46687e-05	1	1	1	1	P63276 [33-45]	P63276 1xCarbamidomethyl [C35]	2	1542.87	High	n/a	High		7.935e-06		2.432e-05	3.16
P63276	40S ribosomal protein S17 OS=Mus musculus OX=10090 GN=Rps17 PE=1 SV=2	[K].RVCEEIAIIPSK.[K]	1xCarbamidomethyl [C3]	0.000196649	3.46687e-05	1	1	1	18	P63276 [33-44]	P63276 1xCarbamidomethyl [C35]	1	1414.77	High	n/a	High		7.935e-06		1.694e-05	2.25
P25444	40S ribosomal protein S2 OS=Mus musculus OX=10090 GN=Rps2 PE=1 SV=3	[R].CGSVLVRLIPAPR.[G]	1xCarbamidomethyl [C1]	1.15241e-07	3.46687e-05	1	1	1	4	P25444 [188-200]	P25444 1xCarbamidomethyl [C188]	1	1437.84	High	n/a	High		7.935e-06		6.601e-09	4.22
P25444	40S ribosomal protein S2 OS=Mus musculus OX=10090 GN=Rps2 PE=1 SV=3	[K].CSKEVATAIR.[G]	1xCarbamidomethyl [C1]	0.00431857	0.000259952	1	1	1	1	P25444 [143-152]	P25444 1xCarbamidomethyl [C143]	1	1134.59	High	n/a	High		5.247e-05		0.0004122	3.05
P25444	40S ribosomal protein S2 OS=Mus musculus OX=10090 GN=Rps2 PE=1 SV=3	[R].CGSVLVR.[L]	1xCarbamidomethyl [C1]	0.0143439	0.000508083	1	1	1	13	P25444 [188-194]	P25444 1xCarbamidomethyl [C188]	0	790.424	High	n/a	High		0.0001348		0.00143	1.67
P25444	40S ribosomal protein S2 OS=Mus musculus OX=10090 GN=Rps2 PE=1 SV=3	[K].LLMMAGIDDCYTSAR.[G]	1xCarbamidomethyl [C10]	2.85428e-07	3.46687e-05	1	1	1	7	P25444 [213-227]	P25444 1xCarbamidomethyl [C222]	0	1716.78	High	n/a	High		7.935e-06		1.712e-08	2.75
P25444	40S ribosomal protein S2 OS=Mus musculus OX=10090 GN=Rps2 PE=1 SV=3	[K].LLMMAGIDDCYTSAR.[G]	1xCarbamidomethyl [C10]; 1xOxidation [M3]	2.32637e-07	3.46687e-05	1	1	1	2	P25444 [213-227]	P25444 1xCarbamidomethyl [C222]	0	1732.77	High	n/a	High		7.935e-06		1.379e-08	3.92
P25444	40S ribosomal protein S2 OS=Mus musculus OX=10090 GN=Rps2 PE=1 SV=3	[K].LLMMAGIDDCYTSAR.[G]	1xCarbamidomethyl [C10]; 2xOxidation [M3; M4]	4.95357e-07	3.46687e-05	1	1	1	3	P25444 [213-227]	P25444 1xCarbamidomethyl [C222]	0	1748.77	High	n/a	High		7.935e-06		3.063e-08	3.75
P25444	40S ribosomal protein S2 OS=Mus musculus OX=10090 GN=Rps2 PE=1 SV=3	[K].KLLMMAGIDDCYTSAR.[G]	1xCarbamidomethyl [C11]	6.12488e-10	3.46687e-05	1	1	1	2	P25444 [212-227]	P25444 1xCarbamidomethyl [C222]	1	1844.87	High	n/a	High		7.935e-06		2.63e-11	4.51
P25444	40S ribosomal protein S2 OS=Mus musculus OX=10090 GN=Rps2 PE=1 SV=3	[R].GCTATLGNFAK.[A]	1xCarbamidomethyl [C2]	0.000181529	3.46687e-05	1	1	1	19	P25444 [228-238]	P25444 1xCarbamidomethyl [C229]	0	1139.55	High	n/a	High		7.935e-06		1.558e-05	2.36
P25444	40S ribosomal protein S2 OS=Mus musculus OX=10090 GN=Rps2 PE=1 SV=3	[R].GTGIVSAPVPKKLLMMAGIDDCYTSAR.[G]	1xCarbamidomethyl [C22]	1.546e-06	3.46687e-05	1	1	1	1	P25444 [201-227]	P25444 1xCarbamidomethyl [C222]	2	2851.45	High	n/a	High		7.935e-06		1.02e-07	3.81
P25444	40S ribosomal protein S2 OS=Mus musculus OX=10090 GN=Rps2 PE=1 SV=3	[R].GTGIVSAPVPKKLLMMAGIDDCYTSAR.[G]	1xCarbamidomethyl [C22]; 1xOxidation [M15]	9.40238e-05	3.46687e-05	1	1	1	1	P25444 [201-227]	P25444 1xCarbamidomethyl [C222]	2	2867.45	High	n/a	High		7.935e-06		7.793e-06	3.53
P25444	40S ribosomal protein S2 OS=Mus musculus OX=10090 GN=Rps2 PE=1 SV=3	[K].VTGRCGSVLVR.[L]	1xCarbamidomethyl [C5]	0.000386415	3.46687e-05	1	1	1	15	P25444 [184-194]	P25444 1xCarbamidomethyl [C188]	1	1203.66	High	n/a	High		7.935e-06		3.431e-05	3.21
P25444	40S ribosomal protein S2 OS=Mus musculus OX=10090 GN=Rps2 PE=1 SV=3	[K].IGKPHTVPCKVTGR.[C]	1xCarbamidomethyl [C9]	2.77915e-07	3.46687e-05	1	1	1	16	P25444 [174-187]	P25444 1xCarbamidomethyl [C182]	1	1549.86	High	n/a	High		7.935e-06		1.665e-08	3.59
P25444	40S ribosomal protein S2 OS=Mus musculus OX=10090 GN=Rps2 PE=1 SV=3	[K].IGKPHTVPCK.[V]	1xCarbamidomethyl [C9]	4.26169e-05	3.46687e-05	1	1	1	50	P25444 [174-183]	P25444 1xCarbamidomethyl [C182]	0	1136.62	High	n/a	High		7.935e-06		3.371e-06	2.62
P25444	40S ribosomal protein S2 OS=Mus musculus OX=10090 GN=Rps2 PE=1 SV=3	[K].LLMMAGIDDCYTSARGCTATLGNFAK.[A]	2xCarbamidomethyl [C10; C17]	0.000576372	3.46687e-05	1	1	1	2	P25444 [213-238]	P25444 2xCarbamidomethyl [C222; C229]	1	2837.31	High	n/a	High		7.935e-06		5.231e-05	3.25
P25444	40S ribosomal protein S2 OS=Mus musculus OX=10090 GN=Rps2 PE=1 SV=3	[K].KLLMMAGIDDCYTSARGCTATLGNFAK.[A]	2xCarbamidomethyl [C11; C18]	1.73411e-08	3.46687e-05	1	1	1	2	P25444 [212-238]	P25444 2xCarbamidomethyl [C222; C229]	2	2965.4	High	n/a	High		7.935e-06		8.983e-10	6.85
P60867	40S ribosomal protein S20 OS=Mus musculus OX=10090 GN=Rps20 PE=1 SV=1	[K].VCADLIR.[G]	1xCarbamidomethyl [C2]	0.00497563	0.000259952	1	1	1	33	P60867 [35-41]	P60867 1xCarbamidomethyl [C36]	0	846.45	High	Low	High	0.1248	5.844e-05	0.1835	0.0004768	1.44	48
P60867	40S ribosomal protein S20 OS=Mus musculus OX=10090 GN=Rps20 PE=1 SV=1	[R].KTPCGEGSKTWDR.[F]	1xCarbamidomethyl [C4]	3.47351e-05	3.46687e-05	1	1	1	1	P60867 [67-79]	P60867 1xCarbamidomethyl [C70]	2	1521.71	High	n/a	High		7.935e-06		2.714e-06	2.78
P60867	40S ribosomal protein S20 OS=Mus musculus OX=10090 GN=Rps20 PE=1 SV=1	[R].KTPCGEGSK.[T]	1xCarbamidomethyl [C4]	0.00838202	0.000366757	1	1	1	1	P60867 [67-75]	P60867 1xCarbamidomethyl [C70]	1	963.456	High	n/a	High		8.513e-05		0.0008159	0.98
P60867	40S ribosomal protein S20 OS=Mus musculus OX=10090 GN=Rps20 PE=1 SV=1	[K].SLEKVCADLIRGAK.[E]	1xCarbamidomethyl [C6]	1.31734e-06	3.46687e-05	1	1	1	11	P60867 [31-44]	P60867 1xCarbamidomethyl [C36]	2	1559.86	High	n/a	High		7.935e-06		8.605e-08	3.03
P60867	40S ribosomal protein S20 OS=Mus musculus OX=10090 GN=Rps20 PE=1 SV=1	[K].SLEKVCADLIR.[G]	1xCarbamidomethyl [C6]	1.40246e-05	3.46687e-05	1	1	1	33	P60867 [31-41]	P60867 1xCarbamidomethyl [C36]	1	1303.7	High	n/a	High		7.935e-06		1.041e-06	3.38
P60867	40S ribosomal protein S20 OS=Mus musculus OX=10090 GN=Rps20 PE=1 SV=1	[R].ITTRKTPCGEGSK.[T]	1xCarbamidomethyl [C8]	1.12251e-06	3.46687e-05	1	1	1	2	P60867 [63-75]	P60867 1xCarbamidomethyl [C70]	2	1434.74	High	n/a	High		7.935e-06		7.301e-08	2.93
P60867	40S ribosomal protein S20 OS=Mus musculus OX=10090 GN=Rps20 PE=1 SV=1	[R].NVKSLEKVCADLIR.[G]	1xCarbamidomethyl [C9]	1.31734e-06	3.46687e-05	1	1	1	2	P60867 [28-41]	P60867 1xCarbamidomethyl [C36]	2	1644.91	High	n/a	High		7.935e-06		8.594e-08	4.67
Q9CQR2	40S ribosomal protein S21 OS=Mus musculus OX=10090 GN=Rps21 PE=1 SV=1	[K].TYGICGAIRR.[M]	1xCarbamidomethyl [C5]	0.000211142	3.46687e-05	1	1	1	8	Q9CQR2 [52-61]	Q9CQR2 1xCarbamidomethyl [C56]	1	1166.61	High	n/a	High		7.935e-06		1.821e-05	2.08
Q9CQR2	40S ribosomal protein S21 OS=Mus musculus OX=10090 GN=Rps21 PE=1 SV=1	[K].TYGICGAIR.[R]	1xCarbamidomethyl [C5]	0.00116249	7.02174e-05	1	1	1	34	Q9CQR2 [52-60]	Q9CQR2 1xCarbamidomethyl [C56]	0	1010.51	High	n/a	High		1.496e-05		0.0001083	1.24
P62267	40S ribosomal protein S23 OS=Mus musculus OX=10090 GN=Rps23 PE=1 SV=3	[K].CVRVQLIK.[N]	1xCarbamidomethyl [C1]	0.0351561	0.00111723	1	1	1	3	P62267 [69-76]	P62267 1xCarbamidomethyl [C69]	1	1015.61	High	n/a	High		0.0003292		0.003831	1.99
P62267	40S ribosomal protein S23 OS=Mus musculus OX=10090 GN=Rps23 PE=1 SV=3	[K].ITAFVPNDGCLNFIEENDEVLVAGFGR.[K]	1xCarbamidomethyl [C10]	2.49309e-12	3.46687e-05	1	1	1	40	P62267 [81-107]	P62267 1xCarbamidomethyl [C90]	0	2996.45	High	n/a	High		7.935e-06		7.901e-14	4.45
P62852	40S ribosomal protein S25 OS=Mus musculus OX=10090 GN=Rps25 PE=1 SV=1	[K].ATYDKLCKEVPNYK.[L]	1xCarbamidomethyl [C7]	3.32005e-07	3.46687e-05	1	1	1	8	P62852 [53-66]	P62852 1xCarbamidomethyl [C59]	2	1728.86	High	n/a	High		7.935e-06		2.013e-08	3.19
P62852	40S ribosomal protein S25 OS=Mus musculus OX=10090 GN=Rps25 PE=1 SV=1	[K].ATYDKLCK.[E]	1xCarbamidomethyl [C7]	0.0058864	0.000314522	1	1	1	8	P62852 [53-60]	P62852 1xCarbamidomethyl [C59]	1	998.498	High	n/a	High		7.473e-05		0.000568	1.36
P62855	40S ribosomal protein S26 OS=Mus musculus OX=10090 GN=Rps26 PE=1 SV=3	[K].LHYCVSCAIHSK.[V]	2xCarbamidomethyl [C4; C7]	8.52077e-07	3.46687e-05	1	1	1	59	P62855 [71-82]	P62855 2xCarbamidomethyl [C74; C77]	0	1474.69	High	n/a	High		7.935e-06		5.47e-08	2.97
P62855	40S ribosomal protein S26 OS=Mus musculus OX=10090 GN=Rps26 PE=1 SV=3	[R].GHVQPIRCTNCAR.[C]	2xCarbamidomethyl [C8; C11]	0.000100955	3.46687e-05	1	1	1	21	P62855 [16-28]	P62855 2xCarbamidomethyl [C23; C26]	1	1568.75	High	n/a	High		7.935e-06		8.386e-06	2.36
Q6ZWY3; Q6ZWU9	40S ribosomal protein S27-like OS=Mus musculus OX=10090 GN=Rps27l PE=1 SV=3 40S ribosomal protein S27 OS=Mus musculus OX=10090 GN=Rps27 PE=1 SV=3	[R].LTEGCSFR.[R]	1xCarbamidomethyl [C5]	0.00146423	0.000136771	2	2	1	35	Q6ZWY3 [73-80]; Q6ZWU9 [73-80]	Q6ZWY3 1xCarbamidomethyl [C77]; Q6ZWU9 1xCarbamidomethyl [C77]	0	969.446	High	n/a	High		2.796e-05		0.0001371	0.53
Q6ZWY3; Q6ZWU9	40S ribosomal protein S27-like OS=Mus musculus OX=10090 GN=Rps27l PE=1 SV=3 40S ribosomal protein S27 OS=Mus musculus OX=10090 GN=Rps27 PE=1 SV=3	[R].LTEGCSFRR.[K]	1xCarbamidomethyl [C5]	0.00626228	0.000314522	2	2	1	10	Q6ZWY3 [73-81]; Q6ZWU9 [73-81]	Q6ZWY3 1xCarbamidomethyl [C77]; Q6ZWU9 1xCarbamidomethyl [C77]	1	1125.55	High	n/a	High		7.473e-05		0.0006067	1.23
Q6ZWY3; Q6ZWU9	40S ribosomal protein S27-like OS=Mus musculus OX=10090 GN=Rps27l PE=1 SV=3 40S ribosomal protein S27 OS=Mus musculus OX=10090 GN=Rps27 PE=1 SV=3	[R].LTEGCSFRRK.[Q]	1xCarbamidomethyl [C5]	0.014598	0.000508083	2	2	1	8	Q6ZWY3 [73-82]; Q6ZWU9 [73-82]	Q6ZWY3 1xCarbamidomethyl [C77]; Q6ZWU9 1xCarbamidomethyl [C77]	2	1253.64	High	n/a	High		0.0001404		0.001458	1.84
Q6ZWY3; Q6ZWU9	40S ribosomal protein S27-like OS=Mus musculus OX=10090 GN=Rps27l PE=1 SV=3 40S ribosomal protein S27 OS=Mus musculus OX=10090 GN=Rps27 PE=1 SV=3	[K].ARLTEGCSFR.[R]	1xCarbamidomethyl [C7]	1.42763e-05	3.46687e-05	2	2	1	3	Q6ZWY3 [71-80]; Q6ZWU9 [71-80]	Q6ZWY3 1xCarbamidomethyl [C77]; Q6ZWU9 1xCarbamidomethyl [C77]	1	1196.58	High	n/a	High		7.935e-06		1.07e-06	3.17
P62858	40S ribosomal protein S28 OS=Mus musculus OX=10090 GN=Rps28 PE=1 SV=1	[K].VLGRTGSQGQCTQVR.[V]	1xCarbamidomethyl [C11]	4.77865e-08	3.46687e-05	1	1	1	4	P62858 [17-31]	P62858 1xCarbamidomethyl [C27]	1	1646.84	High	n/a	High		7.935e-06		2.6e-09	3.56
P62858	40S ribosomal protein S28 OS=Mus musculus OX=10090 GN=Rps28 PE=1 SV=1	[R].VTKVLGRTGSQGQCTQVR.[V]	1xCarbamidomethyl [C14]	4.69442e-08	3.46687e-05	1	1	1	1	P62858 [14-31]	P62858 1xCarbamidomethyl [C27]	2	1975.05	High	n/a	High		7.935e-06		2.557e-09	2.96
P62858	40S ribosomal protein S28 OS=Mus musculus OX=10090 GN=Rps28 PE=1 SV=1	[R].TGSQGQCTQVR.[V]	1xCarbamidomethyl [C7]	1.12293e-05	3.46687e-05	1	1	1	19	P62858 [21-31]	P62858 1xCarbamidomethyl [C27]	0	1221.56	High	n/a	High		7.935e-06		8.259e-07	1.31
P62274	40S ribosomal protein S29 OS=Mus musculus OX=10090 GN=Rps29 PE=1 SV=2	[R].VCSNRHGLIR.[K]	1xCarbamidomethyl [C2]	0.000102766	3.46687e-05	1	1	1	6	P62274 [23-32]	P62274 1xCarbamidomethyl [C24]	1	1211.64	High	n/a	High		7.935e-06		8.527e-06	1.9
P62274	40S ribosomal protein S29 OS=Mus musculus OX=10090 GN=Rps29 PE=1 SV=2	[R].QCFRQYAK.[D]	1xCarbamidomethyl [C2]	0.00113194	7.02174e-05	1	1	1	3	P62274 [41-48]	P62274 1xCarbamidomethyl [C42]	1	1100.53	High	n/a	High		1.496e-05		0.0001052	2.59
P62274	40S ribosomal protein S29 OS=Mus musculus OX=10090 GN=Rps29 PE=1 SV=2	[K].YGLNMCR.[Q]	1xCarbamidomethyl [C6]	0.0175493	0.000588561	1	1	1	26	P62274 [34-40]	P62274 1xCarbamidomethyl [C39]	0	913.402	High	n/a	High		0.0001725		0.001782	1.8
P62274	40S ribosomal protein S29 OS=Mus musculus OX=10090 GN=Rps29 PE=1 SV=2	[K].YGLNMCR.[Q]	1xCarbamidomethyl [C6]; 1xOxidation [M5]	0.0173963	0.000588561	1	1	1	18	P62274 [34-40]	P62274 1xCarbamidomethyl [C39]	0	929.397	High	n/a	High		0.0001725		0.001756	1.31
P62274	40S ribosomal protein S29 OS=Mus musculus OX=10090 GN=Rps29 PE=1 SV=2	[R].KYGLNMCR.[Q]	1xCarbamidomethyl [C7]	0.00471831	0.000259952	1	1	1	12	P62274 [33-40]	P62274 1xCarbamidomethyl [C39]	1	1041.5	High	n/a	High		5.844e-05		0.0004527	1.32
P62274	40S ribosomal protein S29 OS=Mus musculus OX=10090 GN=Rps29 PE=1 SV=2	[R].KYGLNMCR.[Q]	1xCarbamidomethyl [C7]; 1xOxidation [M6]	0.0126833	0.000480989	1	1	1	9	P62274 [33-40]	P62274 1xCarbamidomethyl [C39]	1	1057.49	High	n/a	High		0.0001187		0.001257	1.62
P62274	40S ribosomal protein S29 OS=Mus musculus OX=10090 GN=Rps29 PE=1 SV=2	[R].SCRVCSNR.[H]	2xCarbamidomethyl [C2; C5]	0.00189388	0.000136771	1	1	1	6	P62274 [20-27]	P62274 2xCarbamidomethyl [C21; C24]	1	1038.46	High	n/a	High		2.796e-05		0.0001786	1.74
P62274	40S ribosomal protein S29 OS=Mus musculus OX=10090 GN=Rps29 PE=1 SV=2	[R].SCRVCSNRHGLIR.[K]	2xCarbamidomethyl [C2; C5]	0.0165056	0.000588561	1	1	1	1	P62274 [20-32]	P62274 2xCarbamidomethyl [C21; C24]	2	1614.81	High	n/a	High		0.0001725		0.001667	1.83
P62274	40S ribosomal protein S29 OS=Mus musculus OX=10090 GN=Rps29 PE=1 SV=2	[K].YGLNMCRQCFR.[Q]	2xCarbamidomethyl [C6; C9]	3.32247e-05	3.46687e-05	1	1	1	4	P62274 [34-44]	P62274 2xCarbamidomethyl [C39; C42]	1	1504.66	High	n/a	High		7.935e-06		2.606e-06	2.47
P62274	40S ribosomal protein S29 OS=Mus musculus OX=10090 GN=Rps29 PE=1 SV=2	[K].FGQGSRSCRVCSNR.[H]	2xCarbamidomethyl [C8; C11]	0.00287314	0.000202726	1	1	1	2	P62274 [14-27]	P62274 2xCarbamidomethyl [C21; C24]	2	1670.76	High	n/a	High		4.09e-05		0.0002724	2.91
P62908	40S ribosomal protein S3 OS=Mus musculus OX=10090 GN=Rps3 PE=1 SV=1	[R].FIMESGAKGCEVVVSGK.[L]	1xCarbamidomethyl [C10]	4.53039e-08	3.46687e-05	1	1	1	3	P62908 [125-141]	P62908 1xCarbamidomethyl [C134]	1	1797.89	High	n/a	High		7.935e-06		2.455e-09	3.08
P62908	40S ribosomal protein S3 OS=Mus musculus OX=10090 GN=Rps3 PE=1 SV=1	[R].FIMESGAKGCEVVVSGK.[L]	1xCarbamidomethyl [C10]; 1xOxidation [M3]	2.34715e-07	3.46687e-05	1	1	1	4	P62908 [125-141]	P62908 1xCarbamidomethyl [C134]	1	1813.88	High	n/a	High		7.935e-06		1.393e-08	3.24
P62908	40S ribosomal protein S3 OS=Mus musculus OX=10090 GN=Rps3 PE=1 SV=1	[K].GCEVVVSGK.[L]	1xCarbamidomethyl [C2]	0.00117286	7.02174e-05	1	1	1	29	P62908 [133-141]	P62908 1xCarbamidomethyl [C134]	0	934.466	High	n/a	High		1.496e-05		0.0001094	1.38
P62908	40S ribosomal protein S3 OS=Mus musculus OX=10090 GN=Rps3 PE=1 SV=1	[R].ACYGVLR.[F]	1xCarbamidomethyl [C2]	0.0138487	0.000508083	1	1	1	9	P62908 [118-124]	P62908 1xCarbamidomethyl [C119]	0	838.424	High	n/a	High		0.0001348		0.001384	1.68
P62908	40S ribosomal protein S3 OS=Mus musculus OX=10090 GN=Rps3 PE=1 SV=1	[R].FGFPEGSVELYAEKVATRGLCAIAQAESLR.[Y]	1xCarbamidomethyl [C21]	3.0271e-16	3.46687e-05	1	1	1	3	P62908 [77-106]	P62908 1xCarbamidomethyl [C97]	2	3269.66	High	n/a	High		7.935e-06		5.826e-18	7.08
P62908	40S ribosomal protein S3 OS=Mus musculus OX=10090 GN=Rps3 PE=1 SV=1	[R].GLCAIAQAESLR.[Y]	1xCarbamidomethyl [C3]	2.43393e-05	3.46687e-05	1	1	1	34	P62908 [95-106]	P62908 1xCarbamidomethyl [C97]	0	1288.67	High	n/a	High		7.935e-06		1.879e-06	3.32
P62908	40S ribosomal protein S3 OS=Mus musculus OX=10090 GN=Rps3 PE=1 SV=1	[R].RACYGVLR.[F]	1xCarbamidomethyl [C3]	0.00114203	7.02174e-05	1	1	1	11	P62908 [117-124]	P62908 1xCarbamidomethyl [C119]	1	994.525	High	n/a	High		1.496e-05		0.0001061	2.65
P62908	40S ribosomal protein S3 OS=Mus musculus OX=10090 GN=Rps3 PE=1 SV=1	[K].VATRGLCAIAQAESLR.[Y]	1xCarbamidomethyl [C7]	2.60943e-09	3.46687e-05	1	1	1	13	P62908 [91-106]	P62908 1xCarbamidomethyl [C97]	1	1715.92	High	n/a	High		7.935e-06		1.208e-10	4.42
P97351	40S ribosomal protein S3a OS=Mus musculus OX=10090 GN=Rps3a PE=1 SV=3	[K].LITEDVQGKNCLTNFHGMDLTR.[D]	1xCarbamidomethyl [C11]	1.53055e-09	3.46687e-05	1	1	1	4	P97351 [86-107]	P97351 1xCarbamidomethyl [C96]	1	2562.24	High	n/a	High		7.935e-06		6.929e-11	3.89
P97351	40S ribosomal protein S3a OS=Mus musculus OX=10090 GN=Rps3a PE=1 SV=3	[K].TTDGYLLRLFCVGFTK.[K]	1xCarbamidomethyl [C11]	2.53977e-10	3.46687e-05	1	1	1	5	P97351 [129-144]	P97351 1xCarbamidomethyl [C139]	1	1890.98	High	n/a	High		7.935e-06		1.039e-11	5.15
P97351	40S ribosomal protein S3a OS=Mus musculus OX=10090 GN=Rps3a PE=1 SV=3	[K].LITEDVQGKNCLTNFHGMDLTR.[D]	1xCarbamidomethyl [C11]; 1xOxidation [M18]	7.12709e-09	3.46687e-05	1	1	1	6	P97351 [86-107]	P97351 1xCarbamidomethyl [C96]	1	2578.24	High	n/a	High		7.935e-06		3.51e-10	4.32
P97351	40S ribosomal protein S3a OS=Mus musculus OX=10090 GN=Rps3a PE=1 SV=3	[K].LIPDSIGKDIEKACQSIYPLHDVFVR.[K]	1xCarbamidomethyl [C14]	6.81717e-09	3.46687e-05	1	1	1	4	P97351 [188-213]	P97351 1xCarbamidomethyl [C201]	2	3013.58	High	n/a	High		7.935e-06		3.35e-10	4.87
P97351	40S ribosomal protein S3a OS=Mus musculus OX=10090 GN=Rps3a PE=1 SV=3	[K].NCLTNFHGMDLTR.[D]	1xCarbamidomethyl [C2]	2.1658e-08	3.46687e-05	1	1	1	31	P97351 [95-107]	P97351 1xCarbamidomethyl [C96]	0	1578.72	High	n/a	High		7.935e-06		1.126e-09	3.98
P97351	40S ribosomal protein S3a OS=Mus musculus OX=10090 GN=Rps3a PE=1 SV=3	[K].ACQSIYPLHDVFVR.[K]	1xCarbamidomethyl [C2]	7.00416e-08	3.46687e-05	1	1	1	19	P97351 [200-213]	P97351 1xCarbamidomethyl [C201]	0	1704.85	High	n/a	High		7.935e-06		3.899e-09	3.91
P97351	40S ribosomal protein S3a OS=Mus musculus OX=10090 GN=Rps3a PE=1 SV=3	[K].NCLTNFHGMDLTR.[D]	1xCarbamidomethyl [C2]; 1xOxidation [M9]	3.53191e-08	3.46687e-05	1	1	1	16	P97351 [95-107]	P97351 1xCarbamidomethyl [C96]	0	1594.71	High	n/a	High		7.935e-06		1.9e-09	2.62
P97351	40S ribosomal protein S3a OS=Mus musculus OX=10090 GN=Rps3a PE=1 SV=3	[R].LFCVGFTKK.[R]	1xCarbamidomethyl [C3]	0.000216848	3.46687e-05	1	1	1	1	P97351 [137-145]	P97351 1xCarbamidomethyl [C139]	1	1099.6	High	n/a	High		7.935e-06		1.868e-05	1.95
P97351	40S ribosomal protein S3a OS=Mus musculus OX=10090 GN=Rps3a PE=1 SV=3	[R].LFCVGFTK.[K]	1xCarbamidomethyl [C3]	0.000700771	3.46687e-05	1	1	1	29	P97351 [137-144]	P97351 1xCarbamidomethyl [C139]	0	971.502	High	n/a	High		7.935e-06		6.367e-05	1.89
P97351	40S ribosomal protein S3a OS=Mus musculus OX=10090 GN=Rps3a PE=1 SV=3	[R].DKMCSMVK.[K]	1xCarbamidomethyl [C4]	0.000859584	7.02174e-05	1	1	1	6	P97351 [108-115]	P97351 1xCarbamidomethyl [C111]	1	998.447	High	n/a	High		1.496e-05		7.934e-05	2.01
P97351	40S ribosomal protein S3a OS=Mus musculus OX=10090 GN=Rps3a PE=1 SV=3	[R].DKMCSMVK.[K]	1xCarbamidomethyl [C4]; 1xOxidation [M]	0.00181171	0.000136771	1	1	2	12	P97351 [108-115]	P97351 1xCarbamidomethyl [C111]	1	1014.44	High	n/a	High		2.796e-05		0.0001699	1.62
P97351	40S ribosomal protein S3a OS=Mus musculus OX=10090 GN=Rps3a PE=1 SV=3	[R].DKMCSMVK.[K]	1xCarbamidomethyl [C4]; 2xOxidation [M3; M6]	0.0325359	0.00104198	1	1	1	1	P97351 [108-115]	P97351 1xCarbamidomethyl [C111]	1	1030.44	High	n/a	High		0.0003053		0.003533	0.66
P97351	40S ribosomal protein S3a OS=Mus musculus OX=10090 GN=Rps3a PE=1 SV=3	[K].DIEKACQSIYPLHDVFVR.[K]	1xCarbamidomethyl [C6]	2.65625e-09	3.46687e-05	1	1	1	7	P97351 [196-213]	P97351 1xCarbamidomethyl [C201]	1	2190.1	High	n/a	High		7.935e-06		1.231e-10	3.71
P62702	40S ribosomal protein S4, X isoform OS=Mus musculus OX=10090 GN=Rps4x PE=1 SV=2	[R].ITPEEAKYKLCK.[V]	1xCarbamidomethyl [C11]	2.18682e-06	3.46687e-05	1	1	1	2	P62702 [114-125]	P62702 1xCarbamidomethyl [C124]	2	1479.79	High	n/a	High		7.935e-06		1.469e-07	3.11
P62702	40S ribosomal protein S4, X isoform OS=Mus musculus OX=10090 GN=Rps4x PE=1 SV=2	[K].YALTGDEVKKICMQR.[F]	1xCarbamidomethyl [C12]	2.49596e-09	3.46687e-05	1	1	1	10	P62702 [54-68]	P62702 1xCarbamidomethyl [C65]	2	1811.91	High	n/a	High		7.935e-06		1.152e-10	5.37
P62702	40S ribosomal protein S4, X isoform OS=Mus musculus OX=10090 GN=Rps4x PE=1 SV=2	[K].YALTGDEVKKICMQR.[F]	1xCarbamidomethyl [C12]; 1xOxidation [M13]	1.19414e-07	3.46687e-05	1	1	1	3	P62702 [54-68]	P62702 1xCarbamidomethyl [C65]	2	1827.91	High	n/a	High		7.935e-06		6.877e-09	2.68
P62702	40S ribosomal protein S4, X isoform OS=Mus musculus OX=10090 GN=Rps4x PE=1 SV=2	[K].ITDFIKFDTGNLCMVTGGANLGR.[I]	1xCarbamidomethyl [C13]	6.23238e-11	3.46687e-05	1	1	1	4	P62702 [169-191]	P62702 1xCarbamidomethyl [C181]	1	2500.23	High	n/a	High		7.935e-06		2.354e-12	5.55
P62702	40S ribosomal protein S4, X isoform OS=Mus musculus OX=10090 GN=Rps4x PE=1 SV=2	[K].ITDFIKFDTGNLCMVTGGANLGRIGVITNR.[E]	1xCarbamidomethyl [C13]; 1xOxidation [M14]	7.00685e-07	3.46687e-05	1	1	1	2	P62702 [169-198]	P62702 1xCarbamidomethyl [C181]	2	3269.68	High	n/a	High		7.935e-06		4.425e-08	3.91
P62702	40S ribosomal protein S4, X isoform OS=Mus musculus OX=10090 GN=Rps4x PE=1 SV=2	[K].ITDFIKFDTGNLCMVTGGANLGR.[I]	1xCarbamidomethyl [C13]; 1xOxidation [M14]	1.96399e-08	3.46687e-05	1	1	1	1	P62702 [169-191]	P62702 1xCarbamidomethyl [C181]	1	2516.23	High	n/a	High		7.935e-06		1.023e-09	3.38
P62702	40S ribosomal protein S4, X isoform OS=Mus musculus OX=10090 GN=Rps4x PE=1 SV=2	[R].ECLPLIIFLR.[N]	1xCarbamidomethyl [C2]	4.8697e-05	3.46687e-05	1	1	1	14	P62702 [40-49]	P62702 1xCarbamidomethyl [C41]	0	1273.73	High	n/a	High		7.935e-06		3.887e-06	2.11
P62702	40S ribosomal protein S4, X isoform OS=Mus musculus OX=10090 GN=Rps4x PE=1 SV=2	[K].LRECLPLIIFLR.[N]	1xCarbamidomethyl [C4]	4.95167e-08	3.46687e-05	1	1	1	17	P62702 [38-49]	P62702 1xCarbamidomethyl [C41]	1	1542.92	High	n/a	High		7.935e-06		2.7e-09	2.73
P62702	40S ribosomal protein S4, X isoform OS=Mus musculus OX=10090 GN=Rps4x PE=1 SV=2	[K].YKLCKVR.[K]	1xCarbamidomethyl [C4]	0.258399	0.00968956	1	1	1	1	P62702 [121-127]	P62702 1xCarbamidomethyl [C124]	2	966.555	High	n/a	High		0.002343		0.05872	1.58
P62702	40S ribosomal protein S4, X isoform OS=Mus musculus OX=10090 GN=Rps4x PE=1 SV=2	[K].FDTGNLCMVTGGANLGR.[I]	1xCarbamidomethyl [C7]	4.07032e-09	3.46687e-05	1	1	1	22	P62702 [175-191]	P62702 1xCarbamidomethyl [C181]	0	1782.83	High	n/a	High		7.935e-06		1.931e-10	4.14
P62702	40S ribosomal protein S4, X isoform OS=Mus musculus OX=10090 GN=Rps4x PE=1 SV=2	[K].FDTGNLCMVTGGANLGRIGVITNRER.[H]	1xCarbamidomethyl [C7]	1.89464e-09	3.46687e-05	1	1	1	2	P62702 [175-200]	P62702 1xCarbamidomethyl [C181]	2	2821.42	High	n/a	High		7.935e-06		8.638e-11	2.43
P62702	40S ribosomal protein S4, X isoform OS=Mus musculus OX=10090 GN=Rps4x PE=1 SV=2	[K].FDTGNLCMVTGGANLGRIGVITNR.[E]	1xCarbamidomethyl [C7]	1.79483e-11	3.46687e-05	1	1	1	2	P62702 [175-198]	P62702 1xCarbamidomethyl [C181]	1	2536.28	High	n/a	High		7.935e-06		6.333e-13	5.11
P62702	40S ribosomal protein S4, X isoform OS=Mus musculus OX=10090 GN=Rps4x PE=1 SV=2	[K].FDTGNLCMVTGGANLGR.[I]	1xCarbamidomethyl [C7]; 1xOxidation [M8]	3.17567e-07	3.46687e-05	1	1	1	15	P62702 [175-191]	P62702 1xCarbamidomethyl [C181]	0	1798.82	High	n/a	High		7.935e-06		1.922e-08	3.36
P62702	40S ribosomal protein S4, X isoform OS=Mus musculus OX=10090 GN=Rps4x PE=1 SV=2	[K].FDTGNLCMVTGGANLGRIGVITNR.[E]	1xCarbamidomethyl [C7]; 1xOxidation [M8]	0.000652702	3.46687e-05	1	1	1	1	P62702 [175-198]	P62702 1xCarbamidomethyl [C181]	1	2552.27	High	n/a	High		7.935e-06		5.96e-05	3.15
P97461	40S ribosomal protein S5 OS=Mus musculus OX=10090 GN=Rps5 PE=1 SV=3	[R].RVNQAIWLLCTGAR.[E]	1xCarbamidomethyl [C10]	1.01635e-10	3.46687e-05	1	1	1	10	P97461 [146-159]	P97461 1xCarbamidomethyl [C155]	1	1657.9	High	n/a	High		7.935e-06		3.939e-12	2.99
P97461	40S ribosomal protein S5 OS=Mus musculus OX=10090 GN=Rps5 PE=1 SV=3	[K].AQCPIVER.[L]	1xCarbamidomethyl [C3]	0.000624346	3.46687e-05	1	1	1	35	P97461 [64-71]	P97461 1xCarbamidomethyl [C66]	0	972.493	High	n/a	High		7.935e-06		5.672e-05	1.02
P97461	40S ribosomal protein S5 OS=Mus musculus OX=10090 GN=Rps5 PE=1 SV=3	[R].KAQCPIVER.[L]	1xCarbamidomethyl [C4]	0.00033819	3.46687e-05	1	1	1	17	P97461 [63-71]	P97461 1xCarbamidomethyl [C66]	1	1100.59	High	n/a	High		7.935e-06		2.983e-05	2.64
P97461	40S ribosomal protein S5 OS=Mus musculus OX=10090 GN=Rps5 PE=1 SV=3	[R].FRKAQCPIVER.[L]	1xCarbamidomethyl [C6]	1.50586e-05	3.46687e-05	1	1	1	5	P97461 [61-71]	P97461 1xCarbamidomethyl [C66]	2	1403.76	High	n/a	High		7.935e-06		1.123e-06	3.42
P97461	40S ribosomal protein S5 OS=Mus musculus OX=10090 GN=Rps5 PE=1 SV=3	[R].VNQAIWLLCTGAREAAFR.[N]	1xCarbamidomethyl [C9]	4.94977e-09	3.46687e-05	1	1	1	3	P97461 [147-164]	P97461 1xCarbamidomethyl [C155]	1	2076.08	High	n/a	High		7.935e-06		2.373e-10	5.68
P97461	40S ribosomal protein S5 OS=Mus musculus OX=10090 GN=Rps5 PE=1 SV=3	[R].VNQAIWLLCTGAR.[E]	1xCarbamidomethyl [C9]	1.03618e-06	3.46687e-05	1	1	1	63	P97461 [147-159]	P97461 1xCarbamidomethyl [C155]	0	1501.79	High	n/a	High		7.935e-06		6.664e-08	1.82
P62754	40S ribosomal protein S6 OS=Mus musculus OX=10090 GN=Rps6 PE=1 SV=1	[K].LNISFPATGCQKLIEVDDERK.[L]	1xCarbamidomethyl [C10]	6.94216e-08	3.46687e-05	1	1	1	2	P62754 [3-23]	P62754 1xCarbamidomethyl [C12]	2	2433.24	High	n/a	High		7.935e-06		3.864e-09	5.63
P62754	40S ribosomal protein S6 OS=Mus musculus OX=10090 GN=Rps6 PE=1 SV=1	[K].LNISFPATGCQKLIEVDDER.[K]	1xCarbamidomethyl [C10]	2.32458e-09	3.46687e-05	1	1	1	19	P62754 [3-22]	P62754 1xCarbamidomethyl [C12]	1	2305.15	High	n/a	High		7.935e-06		1.076e-10	4.2
P62754	40S ribosomal protein S6 OS=Mus musculus OX=10090 GN=Rps6 PE=1 SV=1	[K].LNISFPATGCQK.[L]	1xCarbamidomethyl [C10]	2.32809e-05	3.46687e-05	1	1	1	27	P62754 [3-14]	P62754 1xCarbamidomethyl [C12]	0	1335.67	High	n/a	High		7.935e-06		1.787e-06	2.57
P62754	40S ribosomal protein S6 OS=Mus musculus OX=10090 GN=Rps6 PE=1 SV=1	[-].MKLNISFPATGCQK.[L]	1xCarbamidomethyl [C12]	1.10272e-06	3.46687e-05	1	1	1	8	P62754 [1-14]	P62754 1xCarbamidomethyl [C12]	1	1594.81	High	n/a	High		7.935e-06		7.127e-08	4.35
P62754	40S ribosomal protein S6 OS=Mus musculus OX=10090 GN=Rps6 PE=1 SV=1	[-].MKLNISFPATGCQKLIEVDDER.[K]	1xCarbamidomethyl [C12]; 1xOxidation [M1]	1.30418e-09	3.46687e-05	1	1	1	3	P62754 [1-22]	P62754 1xCarbamidomethyl [C12]	2	2580.28	High	n/a	High		7.935e-06		5.825e-11	5.39
P62754	40S ribosomal protein S6 OS=Mus musculus OX=10090 GN=Rps6 PE=1 SV=1	[-].MKLNISFPATGCQK.[L]	1xCarbamidomethyl [C12]; 1xOxidation [M1]	7.65548e-08	3.46687e-05	1	1	1	8	P62754 [1-14]	P62754 1xCarbamidomethyl [C12]	1	1610.8	High	n/a	High		7.935e-06		4.28e-09	4.16
P62754	40S ribosomal protein S6 OS=Mus musculus OX=10090 GN=Rps6 PE=1 SV=1	[R].GCIVDANLSVLNLVIVKKGEK.[D]	1xCarbamidomethyl [C2]	3.23017e-09	3.46687e-05	1	1	1	3	P62754 [99-119]	P62754 1xCarbamidomethyl [C100]	2	2269.29	High	n/a	High		7.935e-06		1.522e-10	6
P62754	40S ribosomal protein S6 OS=Mus musculus OX=10090 GN=Rps6 PE=1 SV=1	[R].GCIVDANLSVLNLVIVK.[K]	1xCarbamidomethyl [C2]	1.67416e-07	3.46687e-05	1	1	1	59	P62754 [99-115]	P62754 1xCarbamidomethyl [C100]	0	1827.04	High	n/a	High		7.935e-06		9.826e-09	3.61
P62754	40S ribosomal protein S6 OS=Mus musculus OX=10090 GN=Rps6 PE=1 SV=1	[K].GHSCYRPR.[R]	1xCarbamidomethyl [C4]	0.00391775	0.000259952	1	1	1	30	P62754 [80-87]	P62754 1xCarbamidomethyl [C83]	0	1032.48	High	n/a	High		5.247e-05		0.0003739	2.26
P62242	40S ribosomal protein S8 OS=Mus musculus OX=10090 GN=Rps8 PE=1 SV=2	[K].NCIVLIDSTPYR.[Q]	1xCarbamidomethyl [C2]	1.27179e-05	3.46687e-05	1	1	1	26	P62242 [99-110]	P62242 1xCarbamidomethyl [C100]	0	1450.74	High	n/a	High		7.935e-06		9.406e-07	3.53
P62242	40S ribosomal protein S8 OS=Mus musculus OX=10090 GN=Rps8 PE=1 SV=2	[K].TLVKNCIVLIDSTPYR.[Q]	1xCarbamidomethyl [C6]	2.47482e-08	3.46687e-05	1	1	1	19	P62242 [95-110]	P62242 1xCarbamidomethyl [C100]	1	1892.03	High	n/a	High		7.935e-06		1.297e-09	3.59
P62242	40S ribosomal protein S8 OS=Mus musculus OX=10090 GN=Rps8 PE=1 SV=2	[R].TKTLVKNCIVLIDSTPYR.[Q]	1xCarbamidomethyl [C8]	3.14635e-08	3.46687e-05	1	1	1	4	P62242 [93-110]	P62242 1xCarbamidomethyl [C100]	2	2121.17	High	n/a	High		7.935e-06		1.676e-09	4.94
P62242	40S ribosomal protein S8 OS=Mus musculus OX=10090 GN=Rps8 PE=1 SV=2	[R].LDVGNFSWGSECCTRKTR.[I]	2xCarbamidomethyl [C12; C13]	0.000105544	3.46687e-05	1	1	1	2	P62242 [60-77]	P62242 2xCarbamidomethyl [C71; C72]	2	2172.99	High	n/a	High		7.935e-06		8.802e-06	4.55
P62242	40S ribosomal protein S8 OS=Mus musculus OX=10090 GN=Rps8 PE=1 SV=2	[R].LDVGNFSWGSECCTRK.[T]	2xCarbamidomethyl [C12; C13]	2.20551e-07	3.46687e-05	1	1	1	3	P62242 [60-75]	P62242 2xCarbamidomethyl [C71; C72]	1	1915.84	High	n/a	High		7.935e-06		1.308e-08	3.52
P62242	40S ribosomal protein S8 OS=Mus musculus OX=10090 GN=Rps8 PE=1 SV=2	[R].LDVGNFSWGSECCTR.[K]	2xCarbamidomethyl [C12; C13]	4.10983e-07	3.46687e-05	1	1	1	8	P62242 [60-74]	P62242 2xCarbamidomethyl [C71; C72]	0	1787.75	High	n/a	High		7.935e-06		2.532e-08	4.85
P62242	40S ribosomal protein S8 OS=Mus musculus OX=10090 GN=Rps8 PE=1 SV=2	[K].ISSLLEEQFQQGKLLACIASRPGQCGRADGYVLEGK.[E]	2xCarbamidomethyl [C17; C25]	0.000323491	3.46687e-05	1	1	1	1	P62242 [158-193]	P62242 2xCarbamidomethyl [C174; C182]	2	3979.02	High	n/a	High		0.0002131		0.0007554	6.76
P62242	40S ribosomal protein S8 OS=Mus musculus OX=10090 GN=Rps8 PE=1 SV=2	[K].ISSLLEEQFQQGKLLACIASRPGQCGR.[A]	2xCarbamidomethyl [C17; C25]	5.60163e-11	3.46687e-05	1	1	1	4	P62242 [158-184]	P62242 2xCarbamidomethyl [C174; C182]	1	3046.56	High	n/a	High		7.935e-06		2.1e-12	5.27
P62242	40S ribosomal protein S8 OS=Mus musculus OX=10090 GN=Rps8 PE=1 SV=2	[K].NAKISSLLEEQFQQGKLLACIASRPGQCGR.[A]	2xCarbamidomethyl [C20; C28]	1.34098e-06	3.46687e-05	1	1	1	2	P62242 [155-184]	P62242 2xCarbamidomethyl [C174; C182]	2	3359.73	High	n/a	High		7.935e-06		8.818e-08	3.62
P62242	40S ribosomal protein S8 OS=Mus musculus OX=10090 GN=Rps8 PE=1 SV=2	[K].LLACIASRPGQCGRADGYVLEGK.[E]	2xCarbamidomethyl [C4; C12]	1.68976e-06	3.46687e-05	1	1	1	2	P62242 [171-193]	P62242 2xCarbamidomethyl [C174; C182]	1	2491.25	High	n/a	High		7.935e-06		1.117e-07	4.19
P62242	40S ribosomal protein S8 OS=Mus musculus OX=10090 GN=Rps8 PE=1 SV=2	[K].LLACIASRPGQCGR.[A]	2xCarbamidomethyl [C4; C12]	4.5726e-07	3.46687e-05	1	1	1	26	P62242 [171-184]	P62242 2xCarbamidomethyl [C174; C182]	0	1558.79	High	n/a	High		7.935e-06		2.836e-08	2.81
Q6ZWN5	40S ribosomal protein S9 OS=Mus musculus OX=10090 GN=Rps9 PE=1 SV=3	[R].SWVCRKTYVTPR.[R]	1xCarbamidomethyl [C4]	2.75454e-07	3.46687e-05	1	1	1	18	Q6ZWN5 [6-17]	Q6ZWN5 1xCarbamidomethyl [C9]	2	1552.81	High	n/a	High		7.935e-06		1.648e-08	2.74
P14206	40S ribosomal protein SA OS=Mus musculus OX=10090 GN=Rpsa PE=1 SV=4	[R].ADHQPLTEASYVNLPTIALCNTDSPLR.[Y]	1xCarbamidomethyl [C20]	1.50357e-09	3.46687e-05	1	1	1	9	P14206 [129-155]	P14206 1xCarbamidomethyl [C148]	0	2996.48	High	n/a	High		7.935e-06		6.783e-11	7.56
P14206	40S ribosomal protein SA OS=Mus musculus OX=10090 GN=Rpsa PE=1 SV=4	[R].YVDIAIPCNNK.[G]	1xCarbamidomethyl [C8]	0.000167571	3.46687e-05	1	1	1	18	P14206 [156-166]	P14206 1xCarbamidomethyl [C163]	0	1306.65	High	n/a	High		7.935e-06		1.436e-05	2.78
P61922	4-aminobutyrate aminotransferase, mitochondrial OS=Mus musculus OX=10090 GN=Abat PE=1 SV=1	[R].CLEEVEDLIVK.[Y]	1xCarbamidomethyl [C1]	9.1524e-06	3.46687e-05	1	2	1	4	P61922 [269-279]	P61922 1xCarbamidomethyl [C269]	0	1346.69	High	n/a	High		7.935e-06		6.677e-07	3.73
P61922	4-aminobutyrate aminotransferase, mitochondrial OS=Mus musculus OX=10090 GN=Abat PE=1 SV=1	[K].QLNTIQNAEAVHFFCNYEESRGNYLVDVDGNR.[M]	1xCarbamidomethyl [C15]	3.86034e-08	3.46687e-05	1	2	1	2	P61922 [61-92]	P61922 1xCarbamidomethyl [C75]	1	3772.74	High	n/a	High		0.0002131		3.183e-06	7.1
P61922	4-aminobutyrate aminotransferase, mitochondrial OS=Mus musculus OX=10090 GN=Abat PE=1 SV=1	[K].QLNTIQNAEAVHFFCNYEESR.[G]	1xCarbamidomethyl [C15]	5.80668e-10	3.46687e-05	1	2	1	6	P61922 [61-81]	P61922 1xCarbamidomethyl [C75]	0	2570.17	High	n/a	High		7.935e-06		2.486e-11	5.49
P61922	4-aminobutyrate aminotransferase, mitochondrial OS=Mus musculus OX=10090 GN=Abat PE=1 SV=1	[R].TMGCLATTHSKAIHK.[I]	1xCarbamidomethyl [C4]	2.61337e-05	3.46687e-05	1	2	1	2	P61922 [221-235]	P61922 1xCarbamidomethyl [C224]	1	1655.84	High	n/a	High		7.935e-06		2.01e-06	2.4
P61922	4-aminobutyrate aminotransferase, mitochondrial OS=Mus musculus OX=10090 GN=Abat PE=1 SV=1	[R].TMGCLATTHSK.[A]	1xCarbamidomethyl [C4]	6.88594e-06	3.46687e-05	1	2	1	43	P61922 [221-231]	P61922 1xCarbamidomethyl [C224]	0	1206.56	High	n/a	High		7.935e-06		4.918e-07	1.34
P61922	4-aminobutyrate aminotransferase, mitochondrial OS=Mus musculus OX=10090 GN=Abat PE=1 SV=1	[R].GTFCSFDTPDEAIR.[N]	1xCarbamidomethyl [C4]	1.57374e-06	3.46687e-05	1	2	1	24	P61922 [437-450]	P61922 1xCarbamidomethyl [C440]	0	1615.71	High	n/a	High		7.935e-06		1.036e-07	3.23
P61922	4-aminobutyrate aminotransferase, mitochondrial OS=Mus musculus OX=10090 GN=Abat PE=1 SV=1	[R].GTFCSFDTPDEAIRNKLILIAR.[N]	1xCarbamidomethyl [C4]	1.17219e-09	3.46687e-05	1	2	1	2	P61922 [437-458]	P61922 1xCarbamidomethyl [C440]	2	2537.32	High	n/a	High		7.935e-06		5.228e-11	4.61
P61922	4-aminobutyrate aminotransferase, mitochondrial OS=Mus musculus OX=10090 GN=Abat PE=1 SV=1	[R].TMGCLATTHSK.[A]	1xCarbamidomethyl [C4]; 1xOxidation [M2]	8.37373e-06	3.46687e-05	1	2	1	36	P61922 [221-231]	P61922 1xCarbamidomethyl [C224]	0	1222.56	High	n/a	High		7.935e-06		6.064e-07	2.3
P61922	4-aminobutyrate aminotransferase, mitochondrial OS=Mus musculus OX=10090 GN=Abat PE=1 SV=1	[R].GRGTFCSFDTPDEAIR.[N]	1xCarbamidomethyl [C6]	5.81114e-08	3.46687e-05	1	2	1	13	P61922 [435-450]	P61922 1xCarbamidomethyl [C440]	1	1828.83	High	n/a	High		7.935e-06		3.216e-09	3.26
P61922	4-aminobutyrate aminotransferase, mitochondrial OS=Mus musculus OX=10090 GN=Abat PE=1 SV=1	[K].GVVLGGCGDKSIR.[F]	1xCarbamidomethyl [C7]	1.49253e-05	3.46687e-05	1	2	1	8	P61922 [461-473]	P61922 1xCarbamidomethyl [C467]	1	1317.69	High	n/a	High		7.935e-06		1.117e-06	2.38
P61922	4-aminobutyrate aminotransferase, mitochondrial OS=Mus musculus OX=10090 GN=Abat PE=1 SV=1	[K].GVVLGGCGDK.[S]	1xCarbamidomethyl [C7]	0.000682344	3.46687e-05	1	2	1	23	P61922 [461-470]	P61922 1xCarbamidomethyl [C467]	0	961.477	High	n/a	High		7.935e-06		6.224e-05	1.93
P61922	4-aminobutyrate aminotransferase, mitochondrial OS=Mus musculus OX=10090 GN=Abat PE=1 SV=1	[R].VRGRGTFCSFDTPDEAIR.[N]	1xCarbamidomethyl [C8]	3.53461e-06	3.46687e-05	1	2	1	2	P61922 [433-450]	P61922 1xCarbamidomethyl [C440]	2	2084	High	n/a	High		7.935e-06		2.433e-07	5.74
P61922	4-aminobutyrate aminotransferase, mitochondrial OS=Mus musculus OX=10090 GN=Abat PE=1 SV=1	[R].NKGVVLGGCGDKSIR.[F]	1xCarbamidomethyl [C9]	1.37618e-08	3.46687e-05	1	2	1	5	P61922 [459-473]	P61922 1xCarbamidomethyl [C467]	2	1559.83	High	n/a	High		7.935e-06		7.022e-10	4.35
P61922	4-aminobutyrate aminotransferase, mitochondrial OS=Mus musculus OX=10090 GN=Abat PE=1 SV=1	[R].NKGVVLGGCGDK.[S]	1xCarbamidomethyl [C9]	4.8266e-05	3.46687e-05	1	2	1	2	P61922 [459-470]	P61922 1xCarbamidomethyl [C467]	1	1203.62	High	n/a	High		7.935e-06		3.852e-06	3.72
P61922	4-aminobutyrate aminotransferase, mitochondrial OS=Mus musculus OX=10090 GN=Abat PE=1 SV=1	[R].GMSQLITMACGSCSNENAFK.[T]	2xCarbamidomethyl [C10; C13]	4.06876e-10	3.46687e-05	1	2	1	30	P61922 [154-173]	P61922 2xCarbamidomethyl [C163; C166]	0	2205.94	High	n/a	High		7.935e-06		1.705e-11	3.55
P61922	4-aminobutyrate aminotransferase, mitochondrial OS=Mus musculus OX=10090 GN=Abat PE=1 SV=1	[R].GMSQLITMACGSCSNENAFK.[T]	2xCarbamidomethyl [C10; C13]; 1xOxidation [M]	3.99704e-10	3.46687e-05	1	2	2	22	P61922 [154-173]	P61922 2xCarbamidomethyl [C163; C166]	0	2221.93	High	n/a	High		7.935e-06		1.674e-11	5.18
P61922	4-aminobutyrate aminotransferase, mitochondrial OS=Mus musculus OX=10090 GN=Abat PE=1 SV=1	[R].GMSQLITMACGSCSNENAFK.[T]	2xCarbamidomethyl [C10; C13]; 2xOxidation [M2; M8]	8.21357e-10	3.46687e-05	1	2	1	4	P61922 [154-173]	P61922 2xCarbamidomethyl [C163; C166]	0	2237.93	High	n/a	High		7.935e-06		3.569e-11	4.65
P61922	4-aminobutyrate aminotransferase, mitochondrial OS=Mus musculus OX=10090 GN=Abat PE=1 SV=1	[K].HGCAFLVDEVQTGGGCTGK.[F]	2xCarbamidomethyl [C3; C16]	4.4437e-12	3.46687e-05	1	1	1	13	P61922 [319-337]	P61922 2xCarbamidomethyl [C321; C334]	0	1992.89	High	n/a	High		7.935e-06		1.447e-13	7.13
P61922	4-aminobutyrate aminotransferase, mitochondrial OS=Mus musculus OX=10090 GN=Abat PE=1 SV=1	[R].KHGCAFLVDEVQTGGGCTGK.[F]	2xCarbamidomethyl [C4; C17]	1.31482e-11	3.46687e-05	1	1	1	24	P61922 [318-337]	P61922 2xCarbamidomethyl [C321; C334]	1	2120.99	High	n/a	High		7.935e-06		4.549e-13	5.76
P61922	4-aminobutyrate aminotransferase, mitochondrial OS=Mus musculus OX=10090 GN=Abat PE=1 SV=1	[K].EELETCMVNQSPGCPDYSILSFMGAFHGR.[T]	2xCarbamidomethyl [C6; C14]	8.22304e-07	3.46687e-05	1	2	1	1	P61922 [192-220]	P61922 2xCarbamidomethyl [C197; C205]	0	3332.45	High	n/a	High		7.935e-06		5.262e-08	3.68
P61922	4-aminobutyrate aminotransferase, mitochondrial OS=Mus musculus OX=10090 GN=Abat PE=1 SV=1	[R].DIARKHGCAFLVDEVQTGGGCTGK.[F]	2xCarbamidomethyl [C8; C21]	9.80463e-12	3.46687e-05	1	1	1	5	P61922 [314-337]	P61922 2xCarbamidomethyl [C321; C334]	2	2576.23	High	n/a	High		7.935e-06		3.353e-13	7.41
P10852	4F2 cell-surface antigen heavy chain OS=Mus musculus OX=10090 GN=Slc3a2 PE=1 SV=1	[R].APRCRELPVQR.[W]	1xCarbamidomethyl [C4]	4.07638e-05	3.46687e-05	1	2	1	4	P10852 [100-110]	P10852 1xCarbamidomethyl [C103]	2	1381.75	High	n/a	High		7.935e-06		3.235e-06	3.6
O88819	4-galactosyl-N-acetylglucosaminide 3-alpha-L-fucosyltransferase 9 OS=Mus musculus OX=10090 GN=Fut9 PE=1 SV=1	[K].LVCWVVSNWNPEHAR.[V]	1xCarbamidomethyl [C3]	1.1321e-07	3.46687e-05	1	1	1	9	O88819 [188-202]	O88819 1xCarbamidomethyl [C190]	0	1866.91	High	n/a	High		7.935e-06		6.477e-09	4.14
O88819	4-galactosyl-N-acetylglucosaminide 3-alpha-L-fucosyltransferase 9 OS=Mus musculus OX=10090 GN=Fut9 PE=1 SV=1	[K].EKLVCWVVSNWNPEHAR.[V]	1xCarbamidomethyl [C5]	8.59687e-07	3.46687e-05	1	1	1	2	O88819 [186-202]	O88819 1xCarbamidomethyl [C190]	1	2124.04	High	n/a	High		7.935e-06		5.483e-08	4.47
O88819	4-galactosyl-N-acetylglucosaminide 3-alpha-L-fucosyltransferase 9 OS=Mus musculus OX=10090 GN=Fut9 PE=1 SV=1	[R].FWESHACLACDHVK.[R]	2xCarbamidomethyl [C7; C10]	1.99847e-09	3.46687e-05	1	1	1	2	O88819 [329-342]	O88819 2xCarbamidomethyl [C335; C338]	0	1759.77	High	n/a	High		7.935e-06		9.124e-11	3.92
Q9JLJ2	4-trimethylaminobutyraldehyde dehydrogenase OS=Mus musculus OX=10090 GN=Aldh9a1 PE=1 SV=1	[R].CQVLLEAAR.[I]	1xCarbamidomethyl [C1]	0.00103578	7.02174e-05	1	1	1	1	Q9JLJ2 [74-82]	Q9JLJ2 1xCarbamidomethyl [C74]	0	1059.56	High	n/a	High		1.496e-05		9.585e-05	2.51
Q9JLJ2	4-trimethylaminobutyraldehyde dehydrogenase OS=Mus musculus OX=10090 GN=Aldh9a1 PE=1 SV=1	[K].SGLERCQVLLEAAR.[I]	1xCarbamidomethyl [C6]	2.58832e-07	3.46687e-05	1	1	1	3	Q9JLJ2 [69-82]	Q9JLJ2 1xCarbamidomethyl [C74]	1	1601.84	High	n/a	High		7.935e-06		1.548e-08	5.1
Q9JLJ2	4-trimethylaminobutyraldehyde dehydrogenase OS=Mus musculus OX=10090 GN=Aldh9a1 PE=1 SV=1	[K].KSGLERCQVLLEAAR.[I]	1xCarbamidomethyl [C7]	2.95979e-05	3.46687e-05	1	1	1	2	Q9JLJ2 [68-82]	Q9JLJ2 1xCarbamidomethyl [C74]	2	1729.94	High	n/a	High		7.935e-06		2.3e-06	3.64
Q9JLJ2	4-trimethylaminobutyraldehyde dehydrogenase OS=Mus musculus OX=10090 GN=Aldh9a1 PE=1 SV=1	[R].VIATFACSGEK.[E]	1xCarbamidomethyl [C7]	9.82977e-05	3.46687e-05	1	1	1	2	Q9JLJ2 [39-49]	Q9JLJ2 1xCarbamidomethyl [C45]	0	1182.58	High	n/a	High		7.935e-06		8.158e-06	2.33
Q9JLJ2	4-trimethylaminobutyraldehyde dehydrogenase OS=Mus musculus OX=10090 GN=Aldh9a1 PE=1 SV=1	[K].EQGATVLCGGEVYVPEDPK.[L]	1xCarbamidomethyl [C8]	4.91158e-06	3.46687e-05	1	1	1	2	Q9JLJ2 [348-366]	Q9JLJ2 1xCarbamidomethyl [C355]	0	2047.96	High	n/a	High		7.935e-06		3.46e-07	3.95
Q9JLJ2	4-trimethylaminobutyraldehyde dehydrogenase OS=Mus musculus OX=10090 GN=Aldh9a1 PE=1 SV=1	[K].SPLIIFSDCNMENAVK.[G]	1xCarbamidomethyl [C9]	1.63072e-06	3.46687e-05	1	1	1	7	Q9JLJ2 [259-274]	Q9JLJ2 1xCarbamidomethyl [C267]	0	1837.88	High	n/a	High		7.935e-06		1.082e-07	3.22
Q9JLJ2	4-trimethylaminobutyraldehyde dehydrogenase OS=Mus musculus OX=10090 GN=Aldh9a1 PE=1 SV=1	[K].SPLIIFSDCNMENAVK.[G]	1xCarbamidomethyl [C9]; 1xOxidation [M11]	3.35214e-05	3.46687e-05	1	1	1	2	Q9JLJ2 [259-274]	Q9JLJ2 1xCarbamidomethyl [C267]	0	1853.88	High	n/a	High		7.935e-06		2.615e-06	2.53
Q9JM14	5'(3')-deoxyribonucleotidase, cytosolic type OS=Mus musculus OX=10090 GN=Nt5c PE=1 SV=1	[K].YDHCVGEK.[Y]	1xCarbamidomethyl [C4]	0.000658525	3.46687e-05	1	1	1	2	Q9JM14 [107-114]	Q9JM14 1xCarbamidomethyl [C110]	0	1007.43	High	n/a	High		7.935e-06		5.984e-05	2.63
Q9JM14	5'(3')-deoxyribonucleotidase, cytosolic type OS=Mus musculus OX=10090 GN=Nt5c PE=1 SV=1	[K].DTEVFICTTPLLK.[Y]	1xCarbamidomethyl [C7]	5.27369e-06	3.46687e-05	1	1	1	7	Q9JM14 [94-106]	Q9JM14 1xCarbamidomethyl [C100]	0	1536.8	High	n/a	High		7.935e-06		3.713e-07	3.78
Q8VCE6	5'(3')-deoxyribonucleotidase, mitochondrial OS=Mus musculus OX=10090 GN=Nt5m PE=1 SV=1	[K].QMANLQNTDVFICTSPIK.[M]	1xCarbamidomethyl [C13]; 1xOxidation [M2]	6.88334e-07	3.46687e-05	1	1	1	1	Q8VCE6 [109-126]	Q8VCE6 1xCarbamidomethyl [C121]	0	2096.02	High	n/a	High		7.935e-06		4.335e-08	2.65
Q9CUX1	52 kDa repressor of the inhibitor of the protein kinase OS=Mus musculus OX=10090 GN=Thap12 PE=2 SV=2	[K].VLCILPVMK.[V]	1xCarbamidomethyl [C3]	0.000400397	3.46687e-05	1	1	1	1	Q9CUX1 [680-688]	Q9CUX1 1xCarbamidomethyl [C682]	0	1072.63	High	n/a	High		7.935e-06		3.575e-05	2.05
O35405	5'-3' exonuclease PLD3 OS=Mus musculus OX=10090 GN=Pld3 PE=1 SV=1	[R].LLISCWGHSDPSMR.[S]	1xCarbamidomethyl [C5]	1.35296e-06	3.46687e-05	1	1	1	15	O35405 [360-373]	O35405 1xCarbamidomethyl [C364]	0	1658.78	High	n/a	High		7.935e-06		8.828e-08	2.99
O35405	5'-3' exonuclease PLD3 OS=Mus musculus OX=10090 GN=Pld3 PE=1 SV=1	[R].LLISCWGHSDPSMR.[S]	1xCarbamidomethyl [C5]; 1xOxidation [M13]	1.87931e-07	3.46687e-05	1	1	1	7	O35405 [360-373]	O35405 1xCarbamidomethyl [C364]	0	1674.77	High	n/a	High		7.935e-06		1.109e-08	2.35
O35405	5'-3' exonuclease PLD3 OS=Mus musculus OX=10090 GN=Pld3 PE=1 SV=1	[K].VRLLISCWGHSDPSMR.[S]	1xCarbamidomethyl [C7]	5.37004e-05	3.46687e-05	1	1	1	3	O35405 [358-373]	O35405 1xCarbamidomethyl [C364]	1	1913.95	High	n/a	High		7.935e-06		4.327e-06	4.55
O35405	5'-3' exonuclease PLD3 OS=Mus musculus OX=10090 GN=Pld3 PE=1 SV=1	[K].VRLLISCWGHSDPSMR.[S]	1xCarbamidomethyl [C7]; 1xOxidation [M15]	0.000844453	7.02174e-05	1	1	1	1	O35405 [358-373]	O35405 1xCarbamidomethyl [C364]	1	1929.94	High	n/a	High		1.496e-05		7.778e-05	2.8
P97789	5'-3' exoribonuclease 1 OS=Mus musculus OX=10090 GN=Xrn1 PE=1 SV=1	[R].ICSLVGMPQPDFSFLR.[T]	1xCarbamidomethyl [C2]	3.12198e-05	3.46687e-05	1	3	1	1	P97789 [1477-1492]	P97789 1xCarbamidomethyl [C1478]	0	1866.92	High	n/a	High		7.935e-06		2.431e-06	2.94
P97789	5'-3' exoribonuclease 1 OS=Mus musculus OX=10090 GN=Xrn1 PE=1 SV=1	[K].GDDEFCNIWQSLQGAGK.[T]	1xCarbamidomethyl [C6]	0.000126082	3.46687e-05	1	3	1	1	P97789 [1226-1242]	P97789 1xCarbamidomethyl [C1231]	0	1924.85	High	n/a	High		7.935e-06		1.058e-05	1.72
P97789	5'-3' exoribonuclease 1 OS=Mus musculus OX=10090 GN=Xrn1 PE=1 SV=1	[R].TTQTMTVCQVK.[L]	1xCarbamidomethyl [C8]	0.000772692	7.02174e-05	1	3	1	2	P97789 [1493-1503]	P97789 1xCarbamidomethyl [C1500]	0	1296.63	High	n/a	High		1.496e-05		7.069e-05	1.38
Q9DBR1	5'-3' exoribonuclease 2 OS=Mus musculus OX=10090 GN=Xrn2 PE=1 SV=1	[K].VVQSYVEGLCWVLR.[Y]	1xCarbamidomethyl [C10]	4.99971e-06	3.46687e-05	1	2	1	1	Q9DBR1 [538-551]	Q9DBR1 1xCarbamidomethyl [C547]	0	1707.89	High	n/a	High		7.935e-06		3.516e-07	3.01
Q9DBR1	5'-3' exoribonuclease 2 OS=Mus musculus OX=10090 GN=Xrn2 PE=1 SV=1	[R].NSPGCQVASNPR.[Q]	1xCarbamidomethyl [C5]	1.64589e-05	3.46687e-05	1	2	1	3	Q9DBR1 [447-458]	Q9DBR1 1xCarbamidomethyl [C451]	0	1286.59	High	n/a	High		7.935e-06		1.238e-06	3.72
P70290	55 kDa erythrocyte membrane protein OS=Mus musculus OX=10090 GN=Mpp1 PE=1 SV=1	[R].VASVAHSAPSEAPSCSPFGK.[K]	1xCarbamidomethyl [C15]	3.00722e-10	3.46687e-05	1	1	1	4	P70290 [228-247]	P70290 1xCarbamidomethyl [C242]	0	1985.94	High	n/a	High		7.935e-06		1.244e-11	5.58
P70290	55 kDa erythrocyte membrane protein OS=Mus musculus OX=10090 GN=Mpp1 PE=1 SV=1	[K].QSCTVAR.[I]	1xCarbamidomethyl [C3]	0.00915531	0.000366757	1	1	1	2	P70290 [92-98]	P70290 1xCarbamidomethyl [C94]	0	821.393	High	n/a	High		8.513e-05		0.0008947	1.4
P70290	55 kDa erythrocyte membrane protein OS=Mus musculus OX=10090 GN=Mpp1 PE=1 SV=1	[K].DNLIPCK.[E]	1xCarbamidomethyl [C6]	0.148731	0.00479437	1	1	1	1	P70290 [174-180]	P70290 1xCarbamidomethyl [C179]	0	859.434	High	n/a	High		0.001207		0.02512	1.66
P70290	55 kDa erythrocyte membrane protein OS=Mus musculus OX=10090 GN=Mpp1 PE=1 SV=1	[K].LNEKQSCTVAR.[I]	1xCarbamidomethyl [C7]	8.91396e-05	3.46687e-05	1	1	1	1	P70290 [88-98]	P70290 1xCarbamidomethyl [C94]	1	1305.66	High	n/a	High		7.935e-06		7.375e-06	2.76
Q5EG47	5'-AMP-activated protein kinase catalytic subunit alpha-1 OS=Mus musculus OX=10090 GN=Prkaa1 PE=1 SV=2	[R].LFQQILSGVDYCHR.[H]	1xCarbamidomethyl [C12]	1.73411e-08	3.46687e-05	1	1	1	1	Q5EG47 [130-143]	Q5EG47 1xCarbamidomethyl [C141]	0	1735.86	High	n/a	High		7.935e-06		8.913e-10	4.71
Q5EG47	5'-AMP-activated protein kinase catalytic subunit alpha-1 OS=Mus musculus OX=10090 GN=Prkaa1 PE=1 SV=2	[R].RLFQQILSGVDYCHR.[H]	1xCarbamidomethyl [C13]	1.50586e-05	3.46687e-05	1	1	1	1	Q5EG47 [129-143]	Q5EG47 1xCarbamidomethyl [C141]	1	1891.96	High	n/a	High		7.935e-06		1.128e-06	3.26
Q5EG47	5'-AMP-activated protein kinase catalytic subunit alpha-1 OS=Mus musculus OX=10090 GN=Prkaa1 PE=1 SV=2	[R].SQSRPNDIMAEVCRAIK.[Q]	1xCarbamidomethyl [C13]	2.24508e-07	3.46687e-05	1	1	1	1	Q5EG47 [413-429]	Q5EG47 1xCarbamidomethyl [C425]	1	1974.98	High	n/a	High		7.935e-06		1.33e-08	4.36
Q5EG47	5'-AMP-activated protein kinase catalytic subunit alpha-1 OS=Mus musculus OX=10090 GN=Prkaa1 PE=1 SV=2	[R].SQSRPNDIMAEVCR.[A]	1xCarbamidomethyl [C13]	3.34713e-09	3.46687e-05	1	1	1	2	Q5EG47 [413-426]	Q5EG47 1xCarbamidomethyl [C425]	0	1662.77	High	n/a	High		7.935e-06		1.579e-10	2.4
Q5EG47	5'-AMP-activated protein kinase catalytic subunit alpha-1 OS=Mus musculus OX=10090 GN=Prkaa1 PE=1 SV=2	[R].SQSRPNDIMAEVCR.[A]	1xCarbamidomethyl [C13]; 1xOxidation [M9]	1.34148e-05	3.46687e-05	1	1	1	3	Q5EG47 [413-426]	Q5EG47 1xCarbamidomethyl [C425]	0	1678.76	High	n/a	High		7.935e-06		9.946e-07	2.36
Q5EG47	5'-AMP-activated protein kinase catalytic subunit alpha-1 OS=Mus musculus OX=10090 GN=Prkaa1 PE=1 SV=2	[K].ICDGIFYTPQYLNPSVISLLK.[H]	1xCarbamidomethyl [C2]	8.37373e-06	3.46687e-05	1	1	1	1	Q5EG47 [237-257]	Q5EG47 1xCarbamidomethyl [C238]	0	2441.28	High	n/a	High		7.935e-06		6.073e-07	2.39
Q5EG47; Q8BRK8	5'-AMP-activated protein kinase catalytic subunit alpha-1 OS=Mus musculus OX=10090 GN=Prkaa1 PE=1 SV=2 5'-AMP-activated protein kinase catalytic subunit alpha-2 OS=Mus musculus OX=10090 GN=Prkaa2 PE=1 SV=3	[R].TSCGSPNYAAPEVISGR.[L]	1xCarbamidomethyl [C3]	2.34624e-08	3.46687e-05	2	2	1	4	Q5EG47 [183-199]; Q8BRK8 [172-188]	Q5EG47 1xCarbamidomethyl [C185]; Q8BRK8 1xCarbamidomethyl [C174]	0	1765.82	High	n/a	High		7.935e-06		1.233e-09	3.84
Q8BRK8	5'-AMP-activated protein kinase catalytic subunit alpha-2 OS=Mus musculus OX=10090 GN=Prkaa2 PE=1 SV=3	[R].CPLDALNTTKPK.[S]	1xCarbamidomethyl [C1]	0.00476025	0.000259952	1	1	1	1	Q8BRK8 [382-393]	Q8BRK8 1xCarbamidomethyl [C382]	0	1357.71	High	n/a	High		5.844e-05		0.0004559	1.74
Q8BRK8	5'-AMP-activated protein kinase catalytic subunit alpha-2 OS=Mus musculus OX=10090 GN=Prkaa2 PE=1 SV=3	[R].LFQQILSAVDYCHR.[H]	1xCarbamidomethyl [C12]	7.72682e-07	3.46687e-05	1	1	1	4	Q8BRK8 [119-132]	Q8BRK8 1xCarbamidomethyl [C130]	0	1749.87	High	n/a	High		7.935e-06		4.896e-08	4.27
Q8BRK8	5'-AMP-activated protein kinase catalytic subunit alpha-2 OS=Mus musculus OX=10090 GN=Prkaa2 PE=1 SV=3	[R].LGSHTMDFFEMCASLITALAR.[-]	1xCarbamidomethyl [C12]; 1xOxidation [M6]	0.172324	0.00605514	1	1	1	1	Q8BRK8 [532-552]	Q8BRK8 1xCarbamidomethyl [C543]	0	2387.12	High	n/a	High		0.001483		0.03114	2.22
Q8BRK8	5'-AMP-activated protein kinase catalytic subunit alpha-2 OS=Mus musculus OX=10090 GN=Prkaa2 PE=1 SV=3	[R].LGSHTMDFFEMCASLITALAR.[-]	1xCarbamidomethyl [C12]; 2xOxidation [M6; M11]	3.79375e-07	3.46687e-05	1	1	1	1	Q8BRK8 [532-552]	Q8BRK8 1xCarbamidomethyl [C543]	0	2403.11	High	n/a	High		7.935e-06		2.31e-08	3.68
Q8BRK8	5'-AMP-activated protein kinase catalytic subunit alpha-2 OS=Mus musculus OX=10090 GN=Prkaa2 PE=1 SV=3	[R].RLFQQILSAVDYCHR.[H]	1xCarbamidomethyl [C13]	5.17678e-08	3.46687e-05	1	1	1	2	Q8BRK8 [118-132]	Q8BRK8 1xCarbamidomethyl [C130]	1	1905.98	High	n/a	High		7.935e-06		2.835e-09	5.46
Q8BRK8	5'-AMP-activated protein kinase catalytic subunit alpha-2 OS=Mus musculus OX=10090 GN=Prkaa2 PE=1 SV=3	[K].ACDIMAEVYR.[A]	1xCarbamidomethyl [C2]	3.56741e-05	3.46687e-05	1	1	1	1	Q8BRK8 [412-421]	Q8BRK8 1xCarbamidomethyl [C413]	0	1227.55	High	n/a	High		7.935e-06		2.792e-06	2.23
Q8BRK8	5'-AMP-activated protein kinase catalytic subunit alpha-2 OS=Mus musculus OX=10090 GN=Prkaa2 PE=1 SV=3	[R].SCSAAGLHR.[A]	1xCarbamidomethyl [C2]	0.00160009	0.000136771	1	1	1	6	Q8BRK8 [489-497]	Q8BRK8 1xCarbamidomethyl [C490]	0	958.452	High	n/a	High		2.796e-05		0.0001495	1.77
Q8BRK8	5'-AMP-activated protein kinase catalytic subunit alpha-2 OS=Mus musculus OX=10090 GN=Prkaa2 PE=1 SV=3	[K].ARCPLDALNTTKPK.[S]	1xCarbamidomethyl [C3]	0.000173637	3.46687e-05	1	1	1	1	Q8BRK8 [380-393]	Q8BRK8 1xCarbamidomethyl [C382]	1	1584.85	High	n/a	High		7.935e-06		1.489e-05	3.07
Q6PAM0	5'-AMP-activated protein kinase subunit beta-2 OS=Mus musculus OX=10090 GN=Prkab2 PE=1 SV=1	[K].LDSMESSETSCR.[D]	1xCarbamidomethyl [C11]	4.25863e-07	3.46687e-05	1	1	1	1	Q6PAM0 [167-178]	Q6PAM0 1xCarbamidomethyl [C177]	0	1401.56	High	n/a	High		7.935e-06		2.623e-08	2.56
Q91WG5	5'-AMP-activated protein kinase subunit gamma-2 OS=Mus musculus OX=10090 GN=Prkag2 PE=1 SV=2	[R].FCLAFQSPARPPLASPTYHAPLR.[T]	1xCarbamidomethyl [C2]	7.9943e-11	3.46687e-05	1	1	1	1	Q91WG5 [204-226]	Q91WG5 1xCarbamidomethyl [C205]	0	2597.34	High	n/a	High		7.935e-06		3.065e-12	5.32
Q64264	5-hydroxytryptamine receptor 1A OS=Mus musculus OX=10090 GN=Htr1a PE=2 SV=2	[K].GHLPLPSESGATSYVPACLER.[K]	1xCarbamidomethyl [C18]	0.00313941	0.000236619	1	1	1	1	Q64264 [303-323]	Q64264 1xCarbamidomethyl [C320]	0	2241.1	High	n/a	High		4.76e-05		0.0002976	2.35
Q64264	5-hydroxytryptamine receptor 1A OS=Mus musculus OX=10090 GN=Htr1a PE=2 SV=2	[R].SNPNECTISK.[D]	1xCarbamidomethyl [C6]	0.000591939	3.46687e-05	1	1	1	1	Q64264 [182-191]	Q64264 1xCarbamidomethyl [C187]	0	1149.52	High	n/a	High		7.935e-06		5.386e-05	2.3
Q3UHB1	5'-nucleotidase domain-containing protein 3 OS=Mus musculus OX=10090 GN=Nt5dc3 PE=1 SV=1	[K].YICYADQTR.[A]	1xCarbamidomethyl [C3]	0.0129083	0.000480989	1	1	1	1	Q3UHB1 [272-280]	Q3UHB1 1xCarbamidomethyl [C274]	0	1189.53	High	n/a	High		0.0001237		0.001284	1.05
Q61503	5'-nucleotidase OS=Mus musculus OX=10090 GN=Nt5e PE=1 SV=2	[R].TIVYLDGSTQTCR.[F]	1xCarbamidomethyl [C12]	2.32726e-06	3.46687e-05	1	1	1	1	Q61503 [344-356]	Q61503 1xCarbamidomethyl [C355]	0	1513.73	High	n/a	High		7.935e-06		1.579e-07	3.55
Q61503	5'-nucleotidase OS=Mus musculus OX=10090 GN=Nt5e PE=1 SV=2	[R].HPDEMFWNHVSMCIVNGGGIR.[S]	1xCarbamidomethyl [C13]	5.27169e-07	3.46687e-05	1	1	1	2	Q61503 [377-397]	Q61503 1xCarbamidomethyl [C389]	0	2456.11	High	n/a	High		7.935e-06		3.273e-08	4.59
Q61503	5'-nucleotidase OS=Mus musculus OX=10090 GN=Nt5e PE=1 SV=2	[R].VVQLEVLCTK.[C]	1xCarbamidomethyl [C8]	0.000203767	3.46687e-05	1	1	1	10	Q61503 [471-480]	Q61503 1xCarbamidomethyl [C478]	0	1188.67	High	n/a	High		7.935e-06		1.758e-05	2.11
Q61503	5'-nucleotidase OS=Mus musculus OX=10090 GN=Nt5e PE=1 SV=2	[K].CLNASLCVGGVAR.[L]	2xCarbamidomethyl [C1; C7]	0.0290811	0.000909004	1	1	1	1	Q61503 [53-65]	Q61503 2xCarbamidomethyl [C53; C59]	0	1376.68	High	n/a	High		0.0002643		0.003088	1.97
Q8K010	5-oxoprolinase OS=Mus musculus OX=10090 GN=Oplah PE=1 SV=1	[R].GGTFTDVFAQCPGGHVR.[V]	1xCarbamidomethyl [C11]	1.60197e-06	3.46687e-05	1	1	1	4	Q8K010 [15-31]	Q8K010 1xCarbamidomethyl [C25]	0	1805.84	High	n/a	High		7.935e-06		1.061e-07	3.62
Q8K010	5-oxoprolinase OS=Mus musculus OX=10090 GN=Oplah PE=1 SV=1	[K].ISGCSGTR.[N]	1xCarbamidomethyl [C4]	0.182542	0.00637401	1	1	1	1	Q8K010 [907-914]	Q8K010 1xCarbamidomethyl [C910]	0	837.388	High	n/a	High		0.001598		0.03429	0.98
Q8K010	5-oxoprolinase OS=Mus musculus OX=10090 GN=Oplah PE=1 SV=1	[R].GHTACADAYLTPTIQR.[Y]	1xCarbamidomethyl [C5]	9.06102e-09	3.46687e-05	1	1	1	2	Q8K010 [232-247]	Q8K010 1xCarbamidomethyl [C236]	0	1774.85	High	n/a	High		7.935e-06		4.524e-10	3.14
Q8K010	5-oxoprolinase OS=Mus musculus OX=10090 GN=Oplah PE=1 SV=1	[R].VANEAMCRPIR.[A]	1xCarbamidomethyl [C7]	7.66355e-05	3.46687e-05	1	1	1	3	Q8K010 [460-470]	Q8K010 1xCarbamidomethyl [C466]	0	1316.66	High	n/a	High		7.935e-06		6.269e-06	2.22
Q8K010	5-oxoprolinase OS=Mus musculus OX=10090 GN=Oplah PE=1 SV=1	[R].LLPASFPCIFGPGEDQPLSPEASR.[K]	1xCarbamidomethyl [C8]	3.37573e-10	3.46687e-05	1	1	1	3	Q8K010 [401-424]	Q8K010 1xCarbamidomethyl [C408]	0	2585.27	High	n/a	High		7.935e-06		1.406e-11	4.66
Q8K010	5-oxoprolinase OS=Mus musculus OX=10090 GN=Oplah PE=1 SV=1	[R].DIPLNQGCLAPVQVIIPK.[G]	1xCarbamidomethyl [C8]	0.00593869	0.000314522	1	1	1	1	Q8K010 [1046-1063]	Q8K010 1xCarbamidomethyl [C1053]	0	1975.1	High	n/a	High		7.473e-05		0.0005709	0.94
Q8K010	5-oxoprolinase OS=Mus musculus OX=10090 GN=Oplah PE=1 SV=1	[R].GHDPSAHVLACFGGAGGQHACAIAR.[A]	2xCarbamidomethyl [C11; C21]	5.79553e-15	3.46687e-05	1	1	1	3	Q8K010 [477-501]	Q8K010 2xCarbamidomethyl [C487; C497]	0	2517.16	High	n/a	High		7.935e-06		1.314e-16	6.44
P63038	60 kDa heat shock protein, mitochondrial OS=Mus musculus OX=10090 GN=Hspd1 PE=1 SV=1	[R].CIPALDSLKPANEDQK.[I]	1xCarbamidomethyl [C1]	3.0909e-08	3.46687e-05	1	2	1	16	P63038 [447-462]	P63038 1xCarbamidomethyl [C447]	0	1798.9	High	n/a	High		7.935e-06		1.646e-09	3.74
P63038	60 kDa heat shock protein, mitochondrial OS=Mus musculus OX=10090 GN=Hspd1 PE=1 SV=1	[K].CEFQDAYVLLSEK.[K]	1xCarbamidomethyl [C1]	1.93086e-06	3.46687e-05	1	1	1	4	P63038 [237-249]	P63038 1xCarbamidomethyl [C237]	0	1601.75	High	n/a	High		7.935e-06		1.293e-07	3.56
P63038	60 kDa heat shock protein, mitochondrial OS=Mus musculus OX=10090 GN=Hspd1 PE=1 SV=1	[R].AAVEEGIVLGGGCALLR.[C]	1xCarbamidomethyl [C13]	1.81225e-09	3.46687e-05	1	2	1	145	P63038 [430-446]	P63038 1xCarbamidomethyl [C442]	0	1684.91	High	n/a	High		7.935e-06		8.239e-11	4.35
P63038	60 kDa heat shock protein, mitochondrial OS=Mus musculus OX=10090 GN=Hspd1 PE=1 SV=1	[K].GQKCEFQDAYVLLSEK.[K]	1xCarbamidomethyl [C4]	1.12165e-08	3.46687e-05	1	1	1	2	P63038 [234-249]	P63038 1xCarbamidomethyl [C237]	1	1914.93	High	n/a	High		7.935e-06		5.645e-10	4.28
P63038	60 kDa heat shock protein, mitochondrial OS=Mus musculus OX=10090 GN=Hspd1 PE=1 SV=1	[R].AAVEEGIVLGGGCALLRCIPALDSLKPANEDQK.[I]	2xCarbamidomethyl [C13; C18]	9.14896e-07	3.46687e-05	1	2	1	3	P63038 [430-462]	P63038 2xCarbamidomethyl [C442; C447]	1	3464.79	High	n/a	High		0.0002131		2.16e-05	8.59
O08848	60 kDa SS-A/Ro ribonucleoprotein OS=Mus musculus OX=10090 GN=RO60 PE=1 SV=1	[R].GCEVIQEIK.[S]	1xCarbamidomethyl [C2]	0.000658525	3.46687e-05	1	1	1	1	O08848 [70-78]	O08848 1xCarbamidomethyl [C71]	0	1075.55	High	n/a	High		7.935e-06		5.999e-05	2.61
O08848	60 kDa SS-A/Ro ribonucleoprotein OS=Mus musculus OX=10090 GN=RO60 PE=1 SV=1	[R].GMLDMCGFDTAALDVIR.[N]	1xCarbamidomethyl [C6]	3.85886e-09	3.46687e-05	1	1	1	1	O08848 [515-531]	O08848 1xCarbamidomethyl [C520]	0	1884.87	High	n/a	High		7.935e-06		1.827e-10	4.11
O08848	60 kDa SS-A/Ro ribonucleoprotein OS=Mus musculus OX=10090 GN=RO60 PE=1 SV=1	[K].AVPEVCR.[I]	1xCarbamidomethyl [C6]	0.0762554	0.00240985	1	1	1	4	O08848 [114-120]	O08848 1xCarbamidomethyl [C119]	0	830.419	High	n/a	High		0.0006331		0.009905	1.19
O08848	60 kDa SS-A/Ro ribonucleoprotein OS=Mus musculus OX=10090 GN=RO60 PE=1 SV=1	[R].GMLDMCGFDTAALDVIR.[N]	1xCarbamidomethyl [C6]; 2xOxidation [M2; M5]	0.212991	0.00771848	1	1	1	1	O08848 [515-531]	O08848 1xCarbamidomethyl [C520]	0	1916.86	High	n/a	High		0.001907		0.04309	1.29
O08848	60 kDa SS-A/Ro ribonucleoprotein OS=Mus musculus OX=10090 GN=RO60 PE=1 SV=1	[R].LIEDGRGCEVIQEIK.[S]	1xCarbamidomethyl [C8]	3.59803e-06	3.46687e-05	1	1	1	1	O08848 [64-78]	O08848 1xCarbamidomethyl [C71]	1	1758.91	High	n/a	High		7.935e-06		2.491e-07	3.49
P14869	60S acidic ribosomal protein P0 OS=Mus musculus OX=10090 GN=Rplp0 PE=1 SV=3	[K].CFIVGADNVGSK.[Q]	1xCarbamidomethyl [C1]	0.000175187	3.46687e-05	1	1	1	4	P14869 [27-38]	P14869 1xCarbamidomethyl [C27]	0	1266.61	High	n/a	High		7.935e-06		1.504e-05	3.66
P14869	60S acidic ribosomal protein P0 OS=Mus musculus OX=10090 GN=Rplp0 PE=1 SV=3	[K].IIQLLDDYPKCFIVGADNVGSK.[Q]	1xCarbamidomethyl [C11]	9.14194e-09	3.46687e-05	1	1	1	11	P14869 [17-38]	P14869 1xCarbamidomethyl [C27]	1	2465.27	High	n/a	High		7.935e-06		4.547e-10	6.47
P14869	60S acidic ribosomal protein P0 OS=Mus musculus OX=10090 GN=Rplp0 PE=1 SV=3	[R].NVASVCLQIGYPTVASVPHSIINGYK.[R]	1xCarbamidomethyl [C6]	2.63274e-09	3.46687e-05	1	1	1	4	P14869 [221-246]	P14869 1xCarbamidomethyl [C226]	0	2787.45	High	n/a	High		7.935e-06		1.219e-10	5.77
P14869	60S acidic ribosomal protein P0 OS=Mus musculus OX=10090 GN=Rplp0 PE=1 SV=3	[R].AGAIAPCEVTVPAQNTGLGPEK.[T]	1xCarbamidomethyl [C7]	1.14133e-09	3.46687e-05	1	1	1	16	P14869 [113-134]	P14869 1xCarbamidomethyl [C119]	0	2180.1	High	n/a	High		7.935e-06		5.043e-11	3.42
P47955	60S acidic ribosomal protein P1 OS=Mus musculus OX=10090 GN=Rplp1 PE=1 SV=1	[K].ALANVNIGSLICNVGAGGPAPAAGAAPAGGAAPSTAAAPAEEK.[K]	1xCarbamidomethyl [C12]	3.62043e-13	3.46687e-05	1	1	1	15	P47955 [50-92]	P47955 1xCarbamidomethyl [C61]	0	3782.91	High	n/a	High		0.0002131		2.881e-09	8.61
P47955	60S acidic ribosomal protein P1 OS=Mus musculus OX=10090 GN=Rplp1 PE=1 SV=1	[-].MASVSELACIYSALILHDDEVTVTEDK.[I]	1xCarbamidomethyl [C9]; 1xMet-loss+Acetyl [N-Term]	9.13843e-10	3.46687e-05	1	1	1	7	P47955 [1-27]	P47955 1xCarbamidomethyl [C9]; 1xMet-loss+Acetyl [N-Term]	0	2920.41	High	n/a	High		0.0002131		3.305e-07	8.06
Q6ZWV3	60S ribosomal protein L10 OS=Mus musculus OX=10090 GN=Rpl10 PE=1 SV=3	[R].ICANKYMVK.[S]	1xCarbamidomethyl [C2]	0.00018315	3.46687e-05	1	2	1	2	Q6ZWV3 [70-78]	Q6ZWV3 1xCarbamidomethyl [C71]	1	1126.57	High	n/a	High		7.935e-06		1.567e-05	2.58
Q6ZWV3	60S ribosomal protein L10 OS=Mus musculus OX=10090 GN=Rpl10 PE=1 SV=3	[K].SCGKDGFHIR.[V]	1xCarbamidomethyl [C2]	0.00111202	7.02174e-05	1	2	1	4	Q6ZWV3 [79-88]	Q6ZWV3 1xCarbamidomethyl [C80]	1	1176.56	High	n/a	High		1.496e-05		0.0001028	2.71
Q6ZWV3	60S ribosomal protein L10 OS=Mus musculus OX=10090 GN=Rpl10 PE=1 SV=3	[R].FCRGVPDAK.[I]	1xCarbamidomethyl [C2]	0.00838202	0.000366757	1	2	1	2	Q6ZWV3 [22-30]	Q6ZWV3 1xCarbamidomethyl [C23]	1	1049.52	High	n/a	High		8.513e-05		0.0008174	1.69
Q6ZWV3	60S ribosomal protein L10 OS=Mus musculus OX=10090 GN=Rpl10 PE=1 SV=3	[R].YCKNKPYPK.[S]	1xCarbamidomethyl [C2]	0.0236138	0.000806488	1	2	1	1	Q6ZWV3 [11-19]	Q6ZWV3 1xCarbamidomethyl [C12]	1	1197.61	High	n/a	High		0.0002409		0.002469	0.68
Q6ZWV3	60S ribosomal protein L10 OS=Mus musculus OX=10090 GN=Rpl10 PE=1 SV=3	[R].ICANKYMVK.[S]	1xCarbamidomethyl [C2]; 1xOxidation [M7]	0.000100955	3.46687e-05	1	2	1	1	Q6ZWV3 [70-78]	Q6ZWV3 1xCarbamidomethyl [C71]	1	1142.57	High	n/a	High		7.935e-06		8.412e-06	1.68
Q6ZWV3	60S ribosomal protein L10 OS=Mus musculus OX=10090 GN=Rpl10 PE=1 SV=3	[K].SRFCRGVPDAK.[I]	1xCarbamidomethyl [C4]	0.000376249	3.46687e-05	1	2	1	26	Q6ZWV3 [20-30]	Q6ZWV3 1xCarbamidomethyl [C23]	2	1292.65	High	n/a	High		7.935e-06		3.345e-05	2.3
Q6ZWV3	60S ribosomal protein L10 OS=Mus musculus OX=10090 GN=Rpl10 PE=1 SV=3	[K].MLSCAGADR.[L]	1xCarbamidomethyl [C4]	0.00637399	0.000314522	1	2	1	16	Q6ZWV3 [102-110]	Q6ZWV3 1xCarbamidomethyl [C105]	0	980.429	High	n/a	High		7.473e-05		0.0006138	2.5
Q6ZWV3	60S ribosomal protein L10 OS=Mus musculus OX=10090 GN=Rpl10 PE=1 SV=3	[K].MLSCAGADR.[L]	1xCarbamidomethyl [C4]; 1xOxidation [M1]	0.000411215	3.46687e-05	1	2	1	13	Q6ZWV3 [102-110]	Q6ZWV3 1xCarbamidomethyl [C105]	0	996.424	High	n/a	High		7.935e-06		3.673e-05	1.35
Q6ZWV3	60S ribosomal protein L10 OS=Mus musculus OX=10090 GN=Rpl10 PE=1 SV=3	[R].LIPDGCGVKYIPNR.[G]	1xCarbamidomethyl [C6]	1.36399e-08	3.46687e-05	1	1	1	33	Q6ZWV3 [190-203]	Q6ZWV3 1xCarbamidomethyl [C195]	1	1601.85	High	n/a	High		7.935e-06		6.948e-10	3.26
Q6ZWV3	60S ribosomal protein L10 OS=Mus musculus OX=10090 GN=Rpl10 PE=1 SV=3	[R].LIPDGCGVKYIPNRGPLDK.[W]	1xCarbamidomethyl [C6]	2.05486e-06	3.46687e-05	1	1	1	5	Q6ZWV3 [190-208]	Q6ZWV3 1xCarbamidomethyl [C195]	2	2112.13	High	n/a	High		7.935e-06		1.376e-07	2.67
Q6ZWV3	60S ribosomal protein L10 OS=Mus musculus OX=10090 GN=Rpl10 PE=1 SV=3	[K].YMVKSCGKDGFHIR.[V]	1xCarbamidomethyl [C6]	1.27034e-08	3.46687e-05	1	2	1	2	Q6ZWV3 [75-88]	Q6ZWV3 1xCarbamidomethyl [C80]	2	1697.83	High	n/a	High		7.935e-06		6.453e-10	3.46
Q6ZWV3	60S ribosomal protein L10 OS=Mus musculus OX=10090 GN=Rpl10 PE=1 SV=3	[R].LIPDGCGVK.[Y]	1xCarbamidomethyl [C6]	0.00303007	0.000202726	1	2	1	33	Q6ZWV3 [190-198]	Q6ZWV3 1xCarbamidomethyl [C195]	0	958.503	High	n/a	High		4.09e-05		0.0002879	1.06
Q6ZWV3	60S ribosomal protein L10 OS=Mus musculus OX=10090 GN=Rpl10 PE=1 SV=3	[K].YMVKSCGK.[D]	1xCarbamidomethyl [C6]	0.00740726	0.000314522	1	2	1	1	Q6ZWV3 [75-82]	Q6ZWV3 1xCarbamidomethyl [C80]	1	972.464	High	n/a	High		7.473e-05		0.000717	2.1
Q6ZWV3	60S ribosomal protein L10 OS=Mus musculus OX=10090 GN=Rpl10 PE=1 SV=3	[K].YMVKSCGKDGFHIR.[V]	1xCarbamidomethyl [C6]; 1xOxidation [M2]	3.56345e-08	3.46687e-05	1	2	1	4	Q6ZWV3 [75-88]	Q6ZWV3 1xCarbamidomethyl [C80]	2	1713.82	High	n/a	High		7.935e-06		1.917e-09	2.44
Q6ZWV3	60S ribosomal protein L10 OS=Mus musculus OX=10090 GN=Rpl10 PE=1 SV=3	[K].YMVKSCGK.[D]	1xCarbamidomethyl [C6]; 1xOxidation [M2]	0.00455417	0.000259952	1	2	1	1	Q6ZWV3 [75-82]	Q6ZWV3 1xCarbamidomethyl [C80]	1	988.459	High	n/a	High		5.844e-05		0.0004362	2.11
Q6ZWV3	60S ribosomal protein L10 OS=Mus musculus OX=10090 GN=Rpl10 PE=1 SV=3	[R].INKMLSCAGADR.[L]	1xCarbamidomethyl [C7]	8.01192e-05	3.46687e-05	1	2	1	5	Q6ZWV3 [99-110]	Q6ZWV3 1xCarbamidomethyl [C105]	1	1335.65	High	n/a	High		7.935e-06		6.571e-06	1.4
Q6ZWV3	60S ribosomal protein L10 OS=Mus musculus OX=10090 GN=Rpl10 PE=1 SV=3	[K].VDEFPLCGHMVSDEYEQLSSEALEAAR.[I]	1xCarbamidomethyl [C7]	2.28185e-11	3.46687e-05	1	2	1	8	Q6ZWV3 [43-69]	Q6ZWV3 1xCarbamidomethyl [C49]	0	3082.38	High	n/a	High		7.935e-06		8.189e-13	6.71
Q6ZWV3	60S ribosomal protein L10 OS=Mus musculus OX=10090 GN=Rpl10 PE=1 SV=3	[K].RLIPDGCGVKYIPNR.[G]	1xCarbamidomethyl [C7]	1.03657e-05	3.46687e-05	1	1	1	8	Q6ZWV3 [189-203]	Q6ZWV3 1xCarbamidomethyl [C195]	2	1757.95	High	n/a	High		7.935e-06		7.606e-07	6.21
Q6ZWV3	60S ribosomal protein L10 OS=Mus musculus OX=10090 GN=Rpl10 PE=1 SV=3	[K].RLIPDGCGVK.[Y]	1xCarbamidomethyl [C7]	0.000164618	3.46687e-05	1	2	1	4	Q6ZWV3 [189-198]	Q6ZWV3 1xCarbamidomethyl [C195]	1	1114.6	High	n/a	High		7.935e-06		1.398e-05	2.58
Q6ZWV3	60S ribosomal protein L10 OS=Mus musculus OX=10090 GN=Rpl10 PE=1 SV=3	[K].VDEFPLCGHMVSDEYEQLSSEALEAAR.[I]	1xCarbamidomethyl [C7]; 1xOxidation [M10]	5.12111e-13	3.46687e-05	1	2	1	11	Q6ZWV3 [43-69]	Q6ZWV3 1xCarbamidomethyl [C49]	0	3098.37	High	n/a	High		7.935e-06		1.484e-14	4.8
Q6ZWV3	60S ribosomal protein L10 OS=Mus musculus OX=10090 GN=Rpl10 PE=1 SV=3	[R].INKMLSCAGADR.[L]	1xCarbamidomethyl [C7]; 1xOxidation [M4]	0.000176752	3.46687e-05	1	2	1	6	Q6ZWV3 [99-110]	Q6ZWV3 1xCarbamidomethyl [C105]	1	1351.65	High	n/a	High		7.935e-06		1.505e-05	3.26
Q6ZWV3	60S ribosomal protein L10 OS=Mus musculus OX=10090 GN=Rpl10 PE=1 SV=3	[R].INKMLSCAGADRLQTGMR.[G]	1xCarbamidomethyl [C7]; 1xOxidation [M4]	2.47577e-07	3.46687e-05	1	2	1	1	Q6ZWV3 [99-116]	Q6ZWV3 1xCarbamidomethyl [C105]	2	2038	High	n/a	High		7.935e-06		1.483e-08	1.72
Q6ZWV3	60S ribosomal protein L10 OS=Mus musculus OX=10090 GN=Rpl10 PE=1 SV=3	[K].AKVDEFPLCGHMVSDEYEQLSSEALEAAR.[I]	1xCarbamidomethyl [C9]	1.54185e-13	3.46687e-05	1	2	1	2	Q6ZWV3 [41-69]	Q6ZWV3 1xCarbamidomethyl [C49]	1	3281.51	High	n/a	High		7.935e-06		4.169e-15	4.66
Q6ZWV3	60S ribosomal protein L10 OS=Mus musculus OX=10090 GN=Rpl10 PE=1 SV=3	[K].AKVDEFPLCGHMVSDEYEQLSSEALEAAR.[I]	1xCarbamidomethyl [C9]; 1xOxidation [M12]	1.1822e-10	3.46687e-05	1	2	1	2	Q6ZWV3 [41-69]	Q6ZWV3 1xCarbamidomethyl [C49]	1	3297.5	High	n/a	High		7.935e-06		4.647e-12	6.19
P53026	60S ribosomal protein L10a OS=Mus musculus OX=10090 GN=Rpl10a PE=1 SV=3	[K].VLCLAVAVGHVK.[M]	1xCarbamidomethyl [C3]	1.34098e-06	3.46687e-05	1	1	1	99	P53026 [162-173]	P53026 1xCarbamidomethyl [C164]	0	1265.74	High	n/a	High		7.935e-06		8.802e-08	3.38
P53026	60S ribosomal protein L10a OS=Mus musculus OX=10090 GN=Rpl10a PE=1 SV=3	[K].KVLCLAVAVGHVK.[M]	1xCarbamidomethyl [C4]	4.7823e-06	3.46687e-05	1	1	1	5	P53026 [161-173]	P53026 1xCarbamidomethyl [C164]	1	1393.83	High	n/a	High		7.935e-06		3.365e-07	2.13
Q9CXW4	60S ribosomal protein L11 OS=Mus musculus OX=10090 GN=Rpl11 PE=1 SV=4	[R].TGCIGAKHR.[I]	1xCarbamidomethyl [C3]	7.52849e-05	3.46687e-05	1	1	1	2	Q9CXW4 [148-156]	Q9CXW4 1xCarbamidomethyl [C150]	1	999.515	High	n/a	High		7.935e-06		6.173e-06	2.58
Q9CXW4	60S ribosomal protein L11 OS=Mus musculus OX=10090 GN=Rpl11 PE=1 SV=4	[R].TGCIGAK.[H]	1xCarbamidomethyl [C3]	0.00256039	0.000170803	1	1	1	12	Q9CXW4 [148-154]	Q9CXW4 1xCarbamidomethyl [C150]	0	706.355	High	n/a	High		3.462e-05		0.0002427	1.71
Q9CXW4	60S ribosomal protein L11 OS=Mus musculus OX=10090 GN=Rpl11 PE=1 SV=4	[R].RTGCIGAKHR.[I]	1xCarbamidomethyl [C4]	0.00179571	0.000136771	1	1	1	1	Q9CXW4 [147-156]	Q9CXW4 1xCarbamidomethyl [C150]	2	1155.62	High	n/a	High		2.796e-05		0.0001682	1.39
Q9CXW4	60S ribosomal protein L11 OS=Mus musculus OX=10090 GN=Rpl11 PE=1 SV=4	[R].RTGCIGAK.[H]	1xCarbamidomethyl [C4]	0.0547134	0.00152429	1	1	1	4	Q9CXW4 [147-154]	Q9CXW4 1xCarbamidomethyl [C150]	1	862.456	High	n/a	High		0.000434		0.006526	1.45
Q9CXW4	60S ribosomal protein L11 OS=Mus musculus OX=10090 GN=Rpl11 PE=1 SV=4	[K].IAVHCTVRGAK.[A]	1xCarbamidomethyl [C5]	3.66384e-05	3.46687e-05	1	1	1	13	Q9CXW4 [68-78]	Q9CXW4 1xCarbamidomethyl [C72]	1	1211.67	High	n/a	High		7.935e-06		2.884e-06	2.25
Q9CXW4	60S ribosomal protein L11 OS=Mus musculus OX=10090 GN=Rpl11 PE=1 SV=4	[K].IAVHCTVR.[G]	1xCarbamidomethyl [C5]	0.00463551	0.000259952	1	1	1	49	Q9CXW4 [68-75]	Q9CXW4 1xCarbamidomethyl [C72]	0	955.514	High	n/a	High		5.844e-05		0.0004446	1.77
Q9CXW4	60S ribosomal protein L11 OS=Mus musculus OX=10090 GN=Rpl11 PE=1 SV=4	[K].RRTGCIGAK.[H]	1xCarbamidomethyl [C5]	0.0230051	0.000779279	1	1	1	4	Q9CXW4 [146-154]	Q9CXW4 1xCarbamidomethyl [C150]	2	1018.56	High	n/a	High		0.0002193		0.002378	1.86
Q9CXW4	60S ribosomal protein L11 OS=Mus musculus OX=10090 GN=Rpl11 PE=1 SV=4	[K].IAVHCTVRGAKAEEILEK.[G]	1xCarbamidomethyl [C5]	0.0918917	0.00296911	1	1	1	2	Q9CXW4 [68-85]	Q9CXW4 1xCarbamidomethyl [C72]	2	2024.1	High	n/a	High		0.00079		0.01277	2.91
Q9CXW4	60S ribosomal protein L11 OS=Mus musculus OX=10090 GN=Rpl11 PE=1 SV=4	[R].NEKIAVHCTVRGAK.[A]	1xCarbamidomethyl [C8]	3.75728e-09	3.46687e-05	1	1	1	3	Q9CXW4 [65-78]	Q9CXW4 1xCarbamidomethyl [C72]	2	1582.85	High	n/a	High		7.935e-06		1.778e-10	4.21
Q9CXW4	60S ribosomal protein L11 OS=Mus musculus OX=10090 GN=Rpl11 PE=1 SV=4	[R].NEKIAVHCTVR.[G]	1xCarbamidomethyl [C8]	7.1374e-05	3.46687e-05	1	1	1	3	Q9CXW4 [65-75]	Q9CXW4 1xCarbamidomethyl [C72]	1	1326.69	High	n/a	High		7.935e-06		5.827e-06	2.78
Q9CXW4	60S ribosomal protein L11 OS=Mus musculus OX=10090 GN=Rpl11 PE=1 SV=4	[K].LCLNICVGESGDR.[L]	2xCarbamidomethyl [C2; C6]	2.95875e-06	3.46687e-05	1	1	1	12	Q9CXW4 [20-32]	Q9CXW4 2xCarbamidomethyl [C21; C25]	0	1492.69	High	n/a	High		7.935e-06		2.029e-07	3.71
Q9CXW4	60S ribosomal protein L11 OS=Mus musculus OX=10090 GN=Rpl11 PE=1 SV=4	[R].KLCLNICVGESGDR.[L]	2xCarbamidomethyl [C3; C7]	9.23667e-05	3.46687e-05	1	1	1	1	Q9CXW4 [19-32]	Q9CXW4 2xCarbamidomethyl [C21; C25]	1	1620.78	High	n/a	High		7.935e-06		7.644e-06	3.07
Q9CXW4	60S ribosomal protein L11 OS=Mus musculus OX=10090 GN=Rpl11 PE=1 SV=4	[R].IRKLCLNICVGESGDR.[L]	2xCarbamidomethyl [C5; C9]	4.73816e-07	3.46687e-05	1	1	1	3	Q9CXW4 [17-32]	Q9CXW4 2xCarbamidomethyl [C21; C25]	2	1889.97	High	n/a	High		7.935e-06		2.944e-08	3.6
P35979	60S ribosomal protein L12 OS=Mus musculus OX=10090 GN=Rpl12 PE=1 SV=2	[R].CTGGEVGATSALAPK.[I]	1xCarbamidomethyl [C1]	6.94482e-07	3.46687e-05	1	1	1	5	P35979 [17-31]	P35979 1xCarbamidomethyl [C17]	0	1418.69	High	n/a	High		7.935e-06		4.383e-08	5.18
P35979	60S ribosomal protein L12 OS=Mus musculus OX=10090 GN=Rpl12 PE=1 SV=2	[K].EILGTAQSVGCNVDGR.[H]	1xCarbamidomethyl [C11]	2.24508e-07	3.46687e-05	1	1	1	28	P35979 [131-146]	P35979 1xCarbamidomethyl [C141]	0	1675.81	High	n/a	High		7.935e-06		1.329e-08	2.94
P35979	60S ribosomal protein L12 OS=Mus musculus OX=10090 GN=Rpl12 PE=1 SV=2	[R].HPHDIIDDINSGAVECPAS.[-]	1xCarbamidomethyl [C16]	3.12089e-06	3.46687e-05	1	1	1	2	P35979 [147-165]	P35979 1xCarbamidomethyl [C162]	0	2046.92	High	n/a	High		7.935e-06		2.135e-07	5.91
P35979	60S ribosomal protein L12 OS=Mus musculus OX=10090 GN=Rpl12 PE=1 SV=2	[K].VVYLRCTGGEVGATSALAPK.[I]	1xCarbamidomethyl [C6]	4.18357e-07	3.46687e-05	1	1	1	9	P35979 [12-31]	P35979 1xCarbamidomethyl [C17]	1	2049.08	High	n/a	High		7.935e-06		2.57e-08	3.84
P35979	60S ribosomal protein L12 OS=Mus musculus OX=10090 GN=Rpl12 PE=1 SV=2	[K].EILGTAQSVGCNVDGRHPHDIIDDINSGAVECPAS.[-]	2xCarbamidomethyl [C11; C32]	0.0762554	0.00240985	1	1	1	1	P35979 [131-165]	P35979 2xCarbamidomethyl [C141; C162]	1	3703.71	High	n/a	High		0.0002131		0.02121	3.53
P47963	60S ribosomal protein L13 OS=Mus musculus OX=10090 GN=Rpl13 PE=1 SV=3	[R].CPTVRYHTK.[V]	1xCarbamidomethyl [C1]	8.52638e-05	3.46687e-05	1	1	1	4	P47963 [61-69]	P47963 1xCarbamidomethyl [C61]	1	1161.58	High	n/a	High		7.935e-06		7.009e-06	4.01
P19253	60S ribosomal protein L13a OS=Mus musculus OX=10090 GN=Rpl13a PE=1 SV=4	[R].CEGINISGNFYR.[N]	1xCarbamidomethyl [C1]	5.86937e-05	3.46687e-05	1	1	1	1	P19253 [38-49]	P19253 1xCarbamidomethyl [C38]	0	1429.65	High	n/a	High		7.935e-06		4.74e-06	3.68
P19253	60S ribosomal protein L13a OS=Mus musculus OX=10090 GN=Rpl13a PE=1 SV=4	[K].ICKFTEVLK.[T]	1xCarbamidomethyl [C2]	0.000131813	3.46687e-05	1	1	1	2	P19253 [189-197]	P19253 1xCarbamidomethyl [C190]	1	1137.63	High	n/a	High		7.935e-06		1.115e-05	3.31
P19253	60S ribosomal protein L13a OS=Mus musculus OX=10090 GN=Rpl13a PE=1 SV=4	[K].KICKFTEVLK.[T]	1xCarbamidomethyl [C3]	0.000786539	7.02174e-05	1	1	1	8	P19253 [188-197]	P19253 1xCarbamidomethyl [C190]	2	1265.73	High	n/a	High		1.496e-05		7.223e-05	4.62
P19253	60S ribosomal protein L13a OS=Mus musculus OX=10090 GN=Rpl13a PE=1 SV=4	[K].VVVVRCEGINISGNFYR.[N]	1xCarbamidomethyl [C6]	2.14663e-08	3.46687e-05	1	1	1	2	P19253 [33-49]	P19253 1xCarbamidomethyl [C38]	1	1982.03	High	n/a	High		7.935e-06		1.118e-09	5.08
P19253	60S ribosomal protein L13a OS=Mus musculus OX=10090 GN=Rpl13a PE=1 SV=4	[R].KVVVVRCEGINISGNFYR.[N]	1xCarbamidomethyl [C7]	3.89631e-07	3.46687e-05	1	1	1	6	P19253 [32-49]	P19253 1xCarbamidomethyl [C38]	2	2110.12	High	n/a	High		7.935e-06		2.381e-08	2.51
P19253	60S ribosomal protein L13a OS=Mus musculus OX=10090 GN=Rpl13a PE=1 SV=4	[K].NVEKKICK.[F]	1xCarbamidomethyl [C7]	0.00727754	0.000314522	1	1	1	2	P19253 [184-191]	P19253 1xCarbamidomethyl [C190]	2	1018.57	High	n/a	High		7.473e-05		0.0007055	2.34
Q9CR57	60S ribosomal protein L14 OS=Mus musculus OX=10090 GN=Rpl14 PE=1 SV=3	[K].CMQLTDFILK.[F]	1xCarbamidomethyl [C1]	0.000254473	3.46687e-05	1	1	1	1	Q9CR57 [54-63]	Q9CR57 1xCarbamidomethyl [C54]	0	1268.64	High	n/a	High		7.935e-06		2.224e-05	1.92
Q9CR57	60S ribosomal protein L14 OS=Mus musculus OX=10090 GN=Rpl14 PE=1 SV=3	[K].CMQLTDFILK.[F]	1xCarbamidomethyl [C1]; 1xOxidation [M2]	2.0556e-05	3.46687e-05	1	1	1	1	Q9CR57 [54-63]	Q9CR57 1xCarbamidomethyl [C54]	0	1284.63	High	n/a	High		7.935e-06		1.57e-06	2.57
Q9CR57	60S ribosomal protein L14 OS=Mus musculus OX=10090 GN=Rpl14 PE=1 SV=3	[R].QAMPFKCMQLTDFILK.[F]	1xCarbamidomethyl [C7]	9.99973e-07	3.46687e-05	1	1	1	8	Q9CR57 [48-63]	Q9CR57 1xCarbamidomethyl [C54]	1	1970.99	High	n/a	High		7.935e-06		6.464e-08	4.28
Q9CR57	60S ribosomal protein L14 OS=Mus musculus OX=10090 GN=Rpl14 PE=1 SV=3	[R].ALVDGPCTRVR.[R]	1xCarbamidomethyl [C7]	2.0556e-05	3.46687e-05	1	1	1	9	Q9CR57 [36-46]	Q9CR57 1xCarbamidomethyl [C42]	1	1243.66	High	n/a	High		7.935e-06		1.562e-06	2.01
Q9CR57	60S ribosomal protein L14 OS=Mus musculus OX=10090 GN=Rpl14 PE=1 SV=3	[R].ALVDGPCTR.[V]	1xCarbamidomethyl [C7]	0.0026062	0.000170803	1	1	1	37	Q9CR57 [36-44]	Q9CR57 1xCarbamidomethyl [C42]	0	988.488	High	n/a	High		3.462e-05		0.0002462	1.16
Q9CR57	60S ribosomal protein L14 OS=Mus musculus OX=10090 GN=Rpl14 PE=1 SV=3	[R].ALVDGPCTRVRR.[Q]	1xCarbamidomethyl [C7]	0.0269002	0.000883695	1	1	1	3	Q9CR57 [36-47]	Q9CR57 1xCarbamidomethyl [C42]	2	1399.76	High	n/a	High		0.0002541		0.002835	1.31
Q9CR57	60S ribosomal protein L14 OS=Mus musculus OX=10090 GN=Rpl14 PE=1 SV=3	[R].QAMPFKCMQLTDFILK.[F]	1xCarbamidomethyl [C7]; 1xOxidation [M]	2.95875e-06	3.46687e-05	1	1	2	9	Q9CR57 [48-63]	Q9CR57 1xCarbamidomethyl [C54]	1	1986.98	High	n/a	High		7.935e-06		2.032e-07	3.39
Q9CR57	60S ribosomal protein L14 OS=Mus musculus OX=10090 GN=Rpl14 PE=1 SV=3	[R].QAMPFKCMQLTDFILKFPHSAR.[Q]	1xCarbamidomethyl [C7]; 1xOxidation [M3]	0.0017331	0.000136771	1	1	1	1	Q9CR57 [48-69]	Q9CR57 1xCarbamidomethyl [C54]	2	2682.34	High	n/a	High		2.796e-05		0.0001633	3.65
Q9CR57	60S ribosomal protein L14 OS=Mus musculus OX=10090 GN=Rpl14 PE=1 SV=3	[R].QAMPFKCMQLTDFILKFPHSAR.[Q]	1xCarbamidomethyl [C7]; 2xOxidation [M3; M8]	0.00023283	3.46687e-05	1	1	1	1	Q9CR57 [48-69]	Q9CR57 1xCarbamidomethyl [C54]	2	2698.33	High	n/a	High		7.935e-06		2.023e-05	4.42
Q9CR57	60S ribosomal protein L14 OS=Mus musculus OX=10090 GN=Rpl14 PE=1 SV=3	[R].QAMPFKCMQLTDFILK.[F]	1xCarbamidomethyl [C7]; 2xOxidation [M3; M8]	0.000121677	3.46687e-05	1	1	1	3	Q9CR57 [48-63]	Q9CR57 1xCarbamidomethyl [C54]	1	2002.98	High	n/a	High		7.935e-06		1.018e-05	2.52
Q9CZM2	60S ribosomal protein L15 OS=Mus musculus OX=10090 GN=Rpl15 PE=1 SV=4	[R].SLQSVAEERAGRHCGALR.[V]	1xCarbamidomethyl [C14]	1.42763e-05	3.46687e-05	1	1	1	1	Q9CZM2 [97-114]	Q9CZM2 1xCarbamidomethyl [C110]	2	1997.01	High	n/a	High		7.935e-06		1.07e-06	2.41
Q9CZM2	60S ribosomal protein L15 OS=Mus musculus OX=10090 GN=Rpl15 PE=1 SV=4	[R].VRCWQYR.[Q]	1xCarbamidomethyl [C3]	0.00637399	0.000314522	1	1	1	9	Q9CZM2 [25-31]	Q9CZM2 1xCarbamidomethyl [C27]	1	1067.52	High	n/a	High		7.473e-05		0.0006157	1.84
Q9CZM2	60S ribosomal protein L15 OS=Mus musculus OX=10090 GN=Rpl15 PE=1 SV=4	[R].AGRHCGALR.[V]	1xCarbamidomethyl [C5]	0.000664401	3.46687e-05	1	1	1	29	Q9CZM2 [106-114]	Q9CZM2 1xCarbamidomethyl [C110]	1	997.511	High	n/a	High		7.935e-06		6.074e-05	1.16
Q9CPR4	60S ribosomal protein L17 OS=Mus musculus OX=10090 GN=Rpl17 PE=1 SV=3	[R].CAQAKQWGWTQGR.[W]	1xCarbamidomethyl [C1]	3.7283e-06	3.46687e-05	1	1	1	3	Q9CPR4 [70-82]	Q9CPR4 1xCarbamidomethyl [C70]	1	1576.74	High	n/a	High		7.935e-06		2.584e-07	3.57
Q9CPR4	60S ribosomal protein L17 OS=Mus musculus OX=10090 GN=Rpl17 PE=1 SV=3	[R].YSLDPENPTKSCK.[S]	1xCarbamidomethyl [C12]	5.81557e-06	3.46687e-05	1	1	1	4	Q9CPR4 [4-16]	Q9CPR4 1xCarbamidomethyl [C15]	1	1538.72	High	n/a	High		7.935e-06		4.117e-07	2.88
Q9CPR4	60S ribosomal protein L17 OS=Mus musculus OX=10090 GN=Rpl17 PE=1 SV=3	[R].YSLDPENPTKSCKSR.[G]	1xCarbamidomethyl [C12]	3.14756e-07	3.46687e-05	1	1	1	2	Q9CPR4 [4-18]	Q9CPR4 1xCarbamidomethyl [C15]	2	1781.85	High	n/a	High		7.935e-06		1.912e-08	4.64
Q9CPR4	60S ribosomal protein L17 OS=Mus musculus OX=10090 GN=Rpl17 PE=1 SV=3	[-].MVRYSLDPENPTKSCK.[S]	1xCarbamidomethyl [C15]; 1xMet-loss [N-Term]	0.23106	0.00856064	1	1	1	1	Q9CPR4 [1-16]	Q9CPR4 1xCarbamidomethyl [C15]; 1xMet-loss [N-Term]	2	1793.89	High	n/a	High		0.000412		0.04563	2.33
Q9CPR4	60S ribosomal protein L17 OS=Mus musculus OX=10090 GN=Rpl17 PE=1 SV=3	[K].QCVPFRR.[Y]	1xCarbamidomethyl [C2]	0.0781491	0.00251231	1	1	1	2	Q9CPR4 [56-62]	Q9CPR4 1xCarbamidomethyl [C57]	1	962.499	High	n/a	High		0.0006719		0.01027	1.66
Q9CPR4	60S ribosomal protein L17 OS=Mus musculus OX=10090 GN=Rpl17 PE=1 SV=3	[K].KQCVPFRR.[Y]	1xCarbamidomethyl [C3]	0.00124804	7.02174e-05	1	1	1	1	Q9CPR4 [55-62]	Q9CPR4 1xCarbamidomethyl [C57]	2	1090.59	High	n/a	High		1.496e-05		0.0001162	1.45
Q9CPR4	60S ribosomal protein L17 OS=Mus musculus OX=10090 GN=Rpl17 PE=1 SV=3	[K].KQCVPFR.[R]	1xCarbamidomethyl [C3]	0.0240282	0.000834203	1	1	1	25	Q9CPR4 [55-61]	Q9CPR4 1xCarbamidomethyl [C57]	1	934.493	High	n/a	High		0.0002409		0.002497	1.86
Q9CPR4	60S ribosomal protein L17 OS=Mus musculus OX=10090 GN=Rpl17 PE=1 SV=3	[R].YNGGVGRCAQAK.[Q]	1xCarbamidomethyl [C8]	2.4106e-07	3.46687e-05	1	1	1	7	Q9CPR4 [63-74]	Q9CPR4 1xCarbamidomethyl [C70]	1	1280.62	High	n/a	High		7.935e-06		1.441e-08	3.24
Q9CPR4	60S ribosomal protein L17 OS=Mus musculus OX=10090 GN=Rpl17 PE=1 SV=3	[K].DVTLKKQCVPFR.[R]	1xCarbamidomethyl [C8]	1.54541e-07	3.46687e-05	1	1	1	7	Q9CPR4 [50-61]	Q9CPR4 1xCarbamidomethyl [C57]	2	1490.81	High	n/a	High		7.935e-06		9e-09	3.41
Q9CPR4	60S ribosomal protein L17 OS=Mus musculus OX=10090 GN=Rpl17 PE=1 SV=3	[R].INPYMSSPCHIEMILTEK.[E]	1xCarbamidomethyl [C9]	3.65557e-11	3.46687e-05	1	1	1	21	Q9CPR4 [136-153]	Q9CPR4 1xCarbamidomethyl [C144]	0	2163.03	High	n/a	High		7.935e-06		1.344e-12	3.2
Q9CPR4	60S ribosomal protein L17 OS=Mus musculus OX=10090 GN=Rpl17 PE=1 SV=3	[R].INPYMSSPCHIEMILTEK.[E]	1xCarbamidomethyl [C9]; 1xOxidation [M]	1.22595e-08	3.46687e-05	1	1	2	8	Q9CPR4 [136-153]	Q9CPR4 1xCarbamidomethyl [C144]	0	2179.02	High	n/a	High		7.935e-06		6.215e-10	3.64
Q9CPR4	60S ribosomal protein L17 OS=Mus musculus OX=10090 GN=Rpl17 PE=1 SV=3	[R].INPYMSSPCHIEMILTEK.[E]	1xCarbamidomethyl [C9]; 2xOxidation [M5; M13]	8.98426e-08	3.46687e-05	1	1	1	1	Q9CPR4 [136-153]	Q9CPR4 1xCarbamidomethyl [C144]	0	2195.02	High	n/a	High		7.935e-06		5.057e-09	2.27
P35980	60S ribosomal protein L18 OS=Mus musculus OX=10090 GN=Rpl18 PE=1 SV=3	[R].ILEVPKLKVCALR.[V]	1xCarbamidomethyl [C10]	2.36629e-09	3.46687e-05	1	1	1	7	P35980 [92-104]	P35980 1xCarbamidomethyl [C101]	2	1538.95	High	n/a	High		7.935e-06		1.092e-10	2.43
P35980	60S ribosomal protein L18 OS=Mus musculus OX=10090 GN=Rpl18 PE=1 SV=3	[K].VCALRVSSR.[A]	1xCarbamidomethyl [C2]	0.00203316	0.000136771	1	1	1	4	P35980 [100-108]	P35980 1xCarbamidomethyl [C101]	1	1047.57	High	n/a	High		2.796e-05		0.000192	1.85
P35980	60S ribosomal protein L18 OS=Mus musculus OX=10090 GN=Rpl18 PE=1 SV=3	[K].LKVCALR.[V]	1xCarbamidomethyl [C4]	0.0610035	0.00175755	1	1	1	15	P35980 [98-104]	P35980 1xCarbamidomethyl [C101]	1	859.518	High	n/a	High		0.0004971		0.007487	1.77
P35980	60S ribosomal protein L18 OS=Mus musculus OX=10090 GN=Rpl18 PE=1 SV=3	[K].LKVCALRVSSR.[A]	1xCarbamidomethyl [C4]	0.201518	0.0073515	1	1	1	2	P35980 [98-108]	P35980 1xCarbamidomethyl [C101]	2	1288.75	High	n/a	High		0.001802		0.03959	1.92
P62717	60S ribosomal protein L18a OS=Mus musculus OX=10090 GN=Rpl18a PE=1 SV=1	[K].CHTPPLYR.[M]	1xCarbamidomethyl [C1]	0.00501986	0.000259952	1	1	1	9	P62717 [22-29]	P62717 1xCarbamidomethyl [C22]	0	1043.51	High	n/a	High		6.478e-05		0.0004838	1.71
P62717	60S ribosomal protein L18a OS=Mus musculus OX=10090 GN=Rpl18a PE=1 SV=1	[K].CRRPAVK.[Q]	1xCarbamidomethyl [C1]	0.0533504	0.00152429	1	1	1	1	P62717 [137-143]	P62717 1xCarbamidomethyl [C137]	1	886.504	High	n/a	High		0.0004295		0.006306	1.15
P62717	60S ribosomal protein L18a OS=Mus musculus OX=10090 GN=Rpl18a PE=1 SV=1	[R].DLTTAGAVTQCYRDMGAR.[H]	1xCarbamidomethyl [C11]	7.5848e-09	3.46687e-05	1	1	1	9	P62717 [99-116]	P62717 1xCarbamidomethyl [C109]	1	1985.92	High	n/a	High		7.935e-06		3.746e-10	3.16
P62717	60S ribosomal protein L18a OS=Mus musculus OX=10090 GN=Rpl18a PE=1 SV=1	[R].DLTTAGAVTQCYR.[D]	1xCarbamidomethyl [C11]	4.82501e-06	3.46687e-05	1	1	1	7	P62717 [99-111]	P62717 1xCarbamidomethyl [C109]	0	1455.69	High	n/a	High		7.935e-06		3.385e-07	3.04
P62717	60S ribosomal protein L18a OS=Mus musculus OX=10090 GN=Rpl18a PE=1 SV=1	[R].DLTTAGAVTQCYRDMGAR.[H]	1xCarbamidomethyl [C11]; 1xOxidation [M15]	4.10983e-07	3.46687e-05	1	1	1	8	P62717 [99-116]	P62717 1xCarbamidomethyl [C109]	1	2001.91	High	n/a	High		7.935e-06		2.518e-08	2.96
P62717	60S ribosomal protein L18a OS=Mus musculus OX=10090 GN=Rpl18a PE=1 SV=1	[R].EYRDLTTAGAVTQCYRDMGAR.[H]	1xCarbamidomethyl [C14]	7.72973e-06	3.46687e-05	1	1	1	1	P62717 [96-116]	P62717 1xCarbamidomethyl [C109]	2	2434.12	High	n/a	High		7.935e-06		5.598e-07	3.81
P62717	60S ribosomal protein L18a OS=Mus musculus OX=10090 GN=Rpl18a PE=1 SV=1	[R].AHSIQIMKVEEIAAGKCR.[R]	1xCarbamidomethyl [C17]	1.76523e-08	3.46687e-05	1	1	1	8	P62717 [121-138]	P62717 1xCarbamidomethyl [C137]	2	2041.07	High	n/a	High		7.935e-06		9.071e-10	3.83
P62717	60S ribosomal protein L18a OS=Mus musculus OX=10090 GN=Rpl18a PE=1 SV=1	[K].VVGRCLPTPK.[C]	1xCarbamidomethyl [C5]	0.00467673	0.000259952	1	1	1	23	P62717 [12-21]	P62717 1xCarbamidomethyl [C16]	1	1126.64	High	n/a	High		5.844e-05		0.0004465	0.79
P62717	60S ribosomal protein L18a OS=Mus musculus OX=10090 GN=Rpl18a PE=1 SV=1	[K].SSGEIVYCGQVFEKSPLR.[V]	1xCarbamidomethyl [C8]	3.9647e-08	3.46687e-05	1	1	1	2	P62717 [57-74]	P62717 1xCarbamidomethyl [C64]	1	2056.02	High	n/a	High		7.935e-06		2.136e-09	4.64
P62717	60S ribosomal protein L18a OS=Mus musculus OX=10090 GN=Rpl18a PE=1 SV=1	[K].SSGEIVYCGQVFEK.[S]	1xCarbamidomethyl [C8]	9.9959e-08	3.46687e-05	1	1	1	19	P62717 [57-70]	P62717 1xCarbamidomethyl [C64]	0	1602.75	High	n/a	High		7.935e-06		5.653e-09	3.14
P62717	60S ribosomal protein L18a OS=Mus musculus OX=10090 GN=Rpl18a PE=1 SV=1	[R].EYKVVGRCLPTPK.[C]	1xCarbamidomethyl [C8]	0.000119533	3.46687e-05	1	1	1	9	P62717 [9-21]	P62717 1xCarbamidomethyl [C16]	2	1546.84	High	n/a	High		7.935e-06		1.005e-05	2.27
P62717	60S ribosomal protein L18a OS=Mus musculus OX=10090 GN=Rpl18a PE=1 SV=1	[K].VEEIAAGKCRRPAVK.[Q]	1xCarbamidomethyl [C9]	0.000245584	3.46687e-05	1	1	1	24	P62717 [129-143]	P62717 1xCarbamidomethyl [C137]	2	1683.93	High	n/a	High		7.935e-06		2.132e-05	2.14
P62717	60S ribosomal protein L18a OS=Mus musculus OX=10090 GN=Rpl18a PE=1 SV=1	[K].VEEIAAGKCR.[R]	1xCarbamidomethyl [C9]	4.45542e-05	3.46687e-05	1	1	1	6	P62717 [129-138]	P62717 1xCarbamidomethyl [C137]	1	1132.58	High	n/a	High		7.935e-06		3.534e-06	2.03
P62717	60S ribosomal protein L18a OS=Mus musculus OX=10090 GN=Rpl18a PE=1 SV=1	[R].CLPTPKCHTPPLYR.[M]	2xCarbamidomethyl [C1; C7]	1.12251e-06	3.46687e-05	1	1	1	10	P62717 [16-29]	P62717 2xCarbamidomethyl [C16; C22]	1	1739.87	High	n/a	High		7.935e-06		7.299e-08	3.27
P62717	60S ribosomal protein L18a OS=Mus musculus OX=10090 GN=Rpl18a PE=1 SV=1	[K].VVGRCLPTPKCHTPPLYR.[M]	2xCarbamidomethyl [C5; C11]	1.57432e-05	3.46687e-05	1	1	1	2	P62717 [12-29]	P62717 2xCarbamidomethyl [C16; C22]	2	2151.13	High	n/a	High		7.935e-06		1.178e-06	2.02
P84099	60S ribosomal protein L19 OS=Mus musculus OX=10090 GN=Rpl19 PE=1 SV=1	[R].CRKNTLAR.[R]	1xCarbamidomethyl [C1]	0.2189	0.00809289	1	1	1	1	P84099 [63-70]	P84099 1xCarbamidomethyl [C63]	2	1018.56	High	n/a	High		0.001981		0.04534	0.6
P84099	60S ribosomal protein L19 OS=Mus musculus OX=10090 GN=Rpl19 PE=1 SV=1	[R].LASSVLRCGKK.[K]	1xCarbamidomethyl [C8]	9.23414e-06	3.46687e-05	1	1	1	5	P84099 [10-20]	P84099 1xCarbamidomethyl [C17]	2	1218.7	High	n/a	High		7.935e-06		6.745e-07	2.76
P84099	60S ribosomal protein L19 OS=Mus musculus OX=10090 GN=Rpl19 PE=1 SV=1	[R].LASSVLRCGK.[K]	1xCarbamidomethyl [C8]	9.56848e-06	3.46687e-05	1	1	1	23	P84099 [10-19]	P84099 1xCarbamidomethyl [C17]	1	1090.6	High	n/a	High		7.935e-06		6.995e-07	1.57
O09167	60S ribosomal protein L21 OS=Mus musculus OX=10090 GN=Rpl21 PE=1 SV=3	[K].GMPHKCYHGK.[T]	1xCarbamidomethyl [C6]	2.20715e-05	3.46687e-05	1	1	1	9	O09167 [51-60]	O09167 1xCarbamidomethyl [C56]	1	1214.56	High	n/a	High		7.935e-06		1.686e-06	1.8
O09167	60S ribosomal protein L21 OS=Mus musculus OX=10090 GN=Rpl21 PE=1 SV=3	[K].GMPHKCYHGK.[T]	1xCarbamidomethyl [C6]; 1xOxidation [M2]	0.000389864	3.46687e-05	1	1	1	10	O09167 [51-60]	O09167 1xCarbamidomethyl [C56]	1	1230.55	High	n/a	High		7.935e-06		3.472e-05	1.47
P67984	60S ribosomal protein L22 OS=Mus musculus OX=10090 GN=Rpl22 PE=1 SV=2	[K].FTLDCTHPVEDGIMDAANFEQFLQER.[I]	1xCarbamidomethyl [C5]	9.22005e-10	3.46687e-05	1	1	1	3	P67984 [21-46]	P67984 1xCarbamidomethyl [C25]	0	3083.39	High	n/a	High		7.935e-06		4.039e-11	6.35
P67984	60S ribosomal protein L22 OS=Mus musculus OX=10090 GN=Rpl22 PE=1 SV=2	[K].FTLDCTHPVEDGIMDAANFEQFLQER.[I]	1xCarbamidomethyl [C5]; 1xOxidation [M14]	7.8564e-10	3.46687e-05	1	1	1	2	P67984 [21-46]	P67984 1xCarbamidomethyl [C25]	0	3099.38	High	n/a	High		7.935e-06		3.424e-11	5.97
P62830	60S ribosomal protein L23 OS=Mus musculus OX=10090 GN=Rpl23 PE=1 SV=1	[K].GSAITGPVAKECADLWPR.[I]	1xCarbamidomethyl [C12]	5.60593e-09	3.46687e-05	1	1	1	22	P62830 [114-131]	P62830 1xCarbamidomethyl [C125]	1	1927.97	High	n/a	High		7.935e-06		2.716e-10	5.05
P62830	60S ribosomal protein L23 OS=Mus musculus OX=10090 GN=Rpl23 PE=1 SV=1	[R].ISLGLPVGAVINCADNTGAK.[N]	1xCarbamidomethyl [C13]	5.96366e-10	3.46687e-05	1	1	1	43	P62830 [16-35]	P62830 1xCarbamidomethyl [C28]	0	1970.04	High	n/a	High		7.935e-06		2.546e-11	2.57
P62830	60S ribosomal protein L23 OS=Mus musculus OX=10090 GN=Rpl23 PE=1 SV=1	[R].ISLGLPVGAVINCADNTGAKNLYIISVK.[G]	1xCarbamidomethyl [C13]	0.0620288	0.00175755	1	1	1	1	P62830 [16-43]	P62830 1xCarbamidomethyl [C28]	1	2900.59	High	n/a	High		0.0004971		0.007619	1.51
P62830	60S ribosomal protein L23 OS=Mus musculus OX=10090 GN=Rpl23 PE=1 SV=1	[K].ECADLWPR.[I]	1xCarbamidomethyl [C2]	0.00684104	0.000314522	1	1	1	42	P62830 [124-131]	P62830 1xCarbamidomethyl [C125]	0	1046.47	High	n/a	High		7.473e-05		0.0006638	2.42
Q8BP67	60S ribosomal protein L24 OS=Mus musculus OX=10090 GN=Rpl24 PE=1 SV=2	[K].CESAFLSKRNPR.[Q]	1xCarbamidomethyl [C1]	2.32726e-06	3.46687e-05	1	1	1	3	Q8BP67 [36-47]	Q8BP67 1xCarbamidomethyl [C36]	2	1464.74	High	n/a	High		7.935e-06		1.567e-07	3.43
Q8BP67	60S ribosomal protein L24 OS=Mus musculus OX=10090 GN=Rpl24 PE=1 SV=2	[K].CESAFLSK.[R]	1xCarbamidomethyl [C1]	0.0129083	0.000480989	1	1	1	5	Q8BP67 [36-43]	Q8BP67 1xCarbamidomethyl [C36]	0	941.44	High	n/a	High		0.0001237		0.00128	1.14
Q8BP67	60S ribosomal protein L24 OS=Mus musculus OX=10090 GN=Rpl24 PE=1 SV=2	[R].TDGKVFQFLNAKCESAFLSK.[R]	1xCarbamidomethyl [C13]	1.31633e-08	3.46687e-05	1	1	1	16	Q8BP67 [24-43]	Q8BP67 1xCarbamidomethyl [C36]	2	2290.15	High	n/a	High		7.935e-06		6.7e-10	4.87
Q8BP67	60S ribosomal protein L24 OS=Mus musculus OX=10090 GN=Rpl24 PE=1 SV=2	[K].VELCSFSGYK.[I]	1xCarbamidomethyl [C4]	7.07423e-05	3.46687e-05	1	1	1	9	Q8BP67 [3-12]	Q8BP67 1xCarbamidomethyl [C6]	0	1189.56	High	n/a	High		7.935e-06		5.784e-06	2.11
Q8BP67	60S ribosomal protein L24 OS=Mus musculus OX=10090 GN=Rpl24 PE=1 SV=2	[-].MKVELCSFSGYKIYPGHGR.[R]	1xCarbamidomethyl [C6]	1.00774e-09	3.46687e-05	1	1	1	5	Q8BP67 [1-19]	Q8BP67 1xCarbamidomethyl [C6]	2	2229.09	High	n/a	High		7.935e-06		4.438e-11	4.73
Q8BP67	60S ribosomal protein L24 OS=Mus musculus OX=10090 GN=Rpl24 PE=1 SV=2	[-].MKVELCSFSGYK.[I]	1xCarbamidomethyl [C6]	3.66384e-05	3.46687e-05	1	1	1	3	Q8BP67 [1-12]	Q8BP67 1xCarbamidomethyl [C6]	1	1448.69	High	n/a	High		7.935e-06		2.881e-06	3.8
Q8BP67	60S ribosomal protein L24 OS=Mus musculus OX=10090 GN=Rpl24 PE=1 SV=2	[-].MKVELCSFSGYKIYPGHGR.[R]	1xCarbamidomethyl [C6]; 1xOxidation [M1]	2.56344e-09	3.46687e-05	1	1	1	11	Q8BP67 [1-19]	Q8BP67 1xCarbamidomethyl [C6]	2	2245.09	High	n/a	High		7.935e-06		1.19e-10	3.09
Q8BP67	60S ribosomal protein L24 OS=Mus musculus OX=10090 GN=Rpl24 PE=1 SV=2	[-].MKVELCSFSGYK.[I]	1xCarbamidomethyl [C6]; 1xOxidation [M1]	4.91158e-06	3.46687e-05	1	1	1	7	Q8BP67 [1-12]	Q8BP67 1xCarbamidomethyl [C6]	1	1464.69	High	n/a	High		7.935e-06		3.449e-07	3.77
Q8BP67	60S ribosomal protein L24 OS=Mus musculus OX=10090 GN=Rpl24 PE=1 SV=2	[K].VFQFLNAKCESAFLSKR.[N]	1xCarbamidomethyl [C9]	1.31532e-10	3.46687e-05	1	1	1	2	Q8BP67 [28-44]	Q8BP67 1xCarbamidomethyl [C36]	2	2045.06	High	n/a	High		7.935e-06		5.178e-12	2.61
Q8BP67	60S ribosomal protein L24 OS=Mus musculus OX=10090 GN=Rpl24 PE=1 SV=2	[K].VFQFLNAKCESAFLSK.[R]	1xCarbamidomethyl [C9]	1.57193e-09	3.46687e-05	1	1	1	19	Q8BP67 [28-43]	Q8BP67 1xCarbamidomethyl [C36]	1	1888.96	High	n/a	High		7.935e-06		7.115e-11	3.58
P14115	60S ribosomal protein L27a OS=Mus musculus OX=10090 GN=Rpl27a PE=1 SV=5	[R].NQSFCPTVNLDKLWTLVSEQTR.[V]	1xCarbamidomethyl [C5]	4.40944e-09	3.46687e-05	1	1	1	4	P14115 [66-87]	P14115 1xCarbamidomethyl [C70]	1	2636.31	High	n/a	High		7.935e-06		2.115e-10	5.13
P14115	60S ribosomal protein L27a OS=Mus musculus OX=10090 GN=Rpl27a PE=1 SV=5	[R].NQSFCPTVNLDK.[L]	1xCarbamidomethyl [C5]	7.13526e-06	3.46687e-05	1	1	1	13	P14115 [66-77]	P14115 1xCarbamidomethyl [C70]	0	1422.67	High	n/a	High		7.935e-06		5.125e-07	3.2
P14115	60S ribosomal protein L27a OS=Mus musculus OX=10090 GN=Rpl27a PE=1 SV=5	[K].RNQSFCPTVNLDK.[L]	1xCarbamidomethyl [C6]	5.46639e-05	3.46687e-05	1	1	1	3	P14115 [65-77]	P14115 1xCarbamidomethyl [C70]	1	1578.77	High	n/a	High		7.935e-06		4.397e-06	2.49
P14115	60S ribosomal protein L27a OS=Mus musculus OX=10090 GN=Rpl27a PE=1 SV=5	[K].IKGVGGACVLVA.[-]	1xCarbamidomethyl [C8]	0.00129315	0.000106916	1	1	1	16	P14115 [137-148]	P14115 1xCarbamidomethyl [C144]	1	1143.66	High	n/a	High		2.232e-05		0.0001207	3.11
P41105	60S ribosomal protein L28 OS=Mus musculus OX=10090 GN=Rpl28 PE=1 SV=2	[-].MSAHLQWMVVRNCSSFLIK.[R]	1xCarbamidomethyl [C13]; 1xOxidation [M8]; 1xMet-loss+Acetyl [N-Term]	0.211532	0.00767009	1	1	1	2	P41105 [1-19]	P41105 1xCarbamidomethyl [C13]; 1xMet-loss+Acetyl [N-Term]	1	2234.12	High	n/a	High		0.000412		0.04278	2.24
P41105	60S ribosomal protein L28 OS=Mus musculus OX=10090 GN=Rpl28 PE=1 SV=2	[R].NCSSFLIKR.[N]	1xCarbamidomethyl [C2]	0.000332232	3.46687e-05	1	1	1	6	P41105 [12-20]	P41105 1xCarbamidomethyl [C13]	1	1124.59	High	n/a	High		7.935e-06		2.945e-05	2.65
P41105	60S ribosomal protein L28 OS=Mus musculus OX=10090 GN=Rpl28 PE=1 SV=2	[R].NCSSFLIK.[R]	1xCarbamidomethyl [C2]	0.00300333	0.000202726	1	1	1	17	P41105 [12-19]	P41105 1xCarbamidomethyl [C13]	0	968.487	High	n/a	High		4.09e-05		0.0002863	1.93
P47915	60S ribosomal protein L29 OS=Mus musculus OX=10090 GN=Rpl29 PE=1 SV=2	[R].LCQPKPKVQTK.[A]	1xCarbamidomethyl [C2]	0.000859584	7.02174e-05	1	1	1	3	P47915 [116-126]	P47915 1xCarbamidomethyl [C117]	1	1326.76	High	n/a	High		1.496e-05		7.886e-05	1.47
P47915	60S ribosomal protein L29 OS=Mus musculus OX=10090 GN=Rpl29 PE=1 SV=2	[R].LCQPKPK.[V]	1xCarbamidomethyl [C2]	0.0131373	0.000480989	1	1	1	33	P47915 [116-122]	P47915 1xCarbamidomethyl [C117]	0	870.487	High	n/a	High		0.0001237		0.00131	1.21
P47915	60S ribosomal protein L29 OS=Mus musculus OX=10090 GN=Rpl29 PE=1 SV=2	[K].GQRLCQPKPK.[V]	1xCarbamidomethyl [C5]	0.000867252	7.02174e-05	1	1	1	69	P47915 [113-122]	P47915 1xCarbamidomethyl [C117]	1	1211.67	High	n/a	High		1.496e-05		7.995e-05	2.14
P27659	60S ribosomal protein L3 OS=Mus musculus OX=10090 GN=Rpl3 PE=1 SV=3	[K].TVFAEHISDECKRR.[F]	1xCarbamidomethyl [C11]	1.1023e-07	3.46687e-05	1	1	1	8	P27659 [104-117]	P27659 1xCarbamidomethyl [C114]	2	1747.85	High	n/a	High		7.935e-06		6.322e-09	4.07
P27659	60S ribosomal protein L3 OS=Mus musculus OX=10090 GN=Rpl3 PE=1 SV=3	[K].TVFAEHISDECKR.[R]	1xCarbamidomethyl [C11]	6.29771e-07	3.46687e-05	1	1	1	6	P27659 [104-116]	P27659 1xCarbamidomethyl [C114]	1	1591.75	High	n/a	High		7.935e-06		3.946e-08	3.34
P27659	60S ribosomal protein L3 OS=Mus musculus OX=10090 GN=Rpl3 PE=1 SV=3	[K].TVFAEHISDECK.[R]	1xCarbamidomethyl [C11]	1.23738e-07	3.46687e-05	1	1	1	15	P27659 [104-115]	P27659 1xCarbamidomethyl [C114]	0	1435.65	High	n/a	High		7.935e-06		7.139e-09	2.53
P27659	60S ribosomal protein L3 OS=Mus musculus OX=10090 GN=Rpl3 PE=1 SV=3	[R].TFKTVFAEHISDECK.[R]	1xCarbamidomethyl [C14]	0.000597221	3.46687e-05	1	1	1	1	P27659 [101-115]	P27659 1xCarbamidomethyl [C114]	1	1811.86	High	n/a	High		7.935e-06		5.414e-05	2.66
P27659	60S ribosomal protein L3 OS=Mus musculus OX=10090 GN=Rpl3 PE=1 SV=3	[R].GLRTFKTVFAEHISDECK.[R]	1xCarbamidomethyl [C17]	2.01786e-07	3.46687e-05	1	1	1	1	P27659 [98-115]	P27659 1xCarbamidomethyl [C114]	2	2138.07	High	n/a	High		7.935e-06		1.196e-08	2.27
P27659	60S ribosomal protein L3 OS=Mus musculus OX=10090 GN=Rpl3 PE=1 SV=3	[K].YCKKWQDDTGK.[K]	1xCarbamidomethyl [C2]	0.000973369	7.02174e-05	1	1	1	1	P27659 [133-143]	P27659 1xCarbamidomethyl [C134]	2	1428.66	High	n/a	High		1.496e-05		9.027e-05	2.54
P27659	60S ribosomal protein L3 OS=Mus musculus OX=10090 GN=Rpl3 PE=1 SV=3	[K].GCVVGTKK.[R]	1xCarbamidomethyl [C2]	0.00515491	0.000289748	1	1	1	1	P27659 [335-342]	P27659 1xCarbamidomethyl [C336]	1	848.466	High	n/a	High		7.049e-05		0.0004931	1.53
P27659	60S ribosomal protein L3 OS=Mus musculus OX=10090 GN=Rpl3 PE=1 SV=3	[K].GCVVGTK.[K]	1xCarbamidomethyl [C2]	0.0328175	0.00104198	1	1	1	15	P27659 [335-341]	P27659 1xCarbamidomethyl [C336]	0	720.371	High	n/a	High		0.0003053		0.003538	1.49
P27659	60S ribosomal protein L3 OS=Mus musculus OX=10090 GN=Rpl3 PE=1 SV=3	[K].SINPLGGFVHYGEVTNDFIMLKGCVVGTK.[K]	1xCarbamidomethyl [C24]	2.304e-09	3.46687e-05	1	1	1	2	P27659 [313-341]	P27659 1xCarbamidomethyl [C336]	1	3152.59	High	n/a	High		7.935e-06		1.068e-10	3.9
P27659	60S ribosomal protein L3 OS=Mus musculus OX=10090 GN=Rpl3 PE=1 SV=3	[K].VACIGAWHPAR.[V]	1xCarbamidomethyl [C3]	9.48022e-07	3.46687e-05	1	1	1	69	P27659 [251-261]	P27659 1xCarbamidomethyl [C253]	0	1237.63	High	n/a	High		7.935e-06		6.068e-08	3.06
P27659	60S ribosomal protein L3 OS=Mus musculus OX=10090 GN=Rpl3 PE=1 SV=3	[K].VACIGAWHPARVAFSVAR.[A]	1xCarbamidomethyl [C3]	0.0010828	7.02174e-05	1	1	1	1	P27659 [251-268]	P27659 1xCarbamidomethyl [C253]	1	1968.04	High	n/a	High		1.496e-05		0.0001	1.61
P27659	60S ribosomal protein L3 OS=Mus musculus OX=10090 GN=Rpl3 PE=1 SV=3	[K].KYCQVIR.[I]	1xCarbamidomethyl [C3]	0.0120311	0.000424947	1	1	1	24	P27659 [155-161]	P27659 1xCarbamidomethyl [C157]	1	966.519	High	n/a	High		0.0001013		0.001197	1.81
P27659	60S ribosomal protein L3 OS=Mus musculus OX=10090 GN=Rpl3 PE=1 SV=3	[R].KVACIGAWHPAR.[V]	1xCarbamidomethyl [C4]	5.51135e-07	3.46687e-05	1	1	1	42	P27659 [250-261]	P27659 1xCarbamidomethyl [C253]	1	1365.72	High	n/a	High		7.935e-06		3.438e-08	4.46
P27659	60S ribosomal protein L3 OS=Mus musculus OX=10090 GN=Rpl3 PE=1 SV=3	[K].AFTKYCKK.[W]	1xCarbamidomethyl [C6]	0.00684104	0.000314522	1	1	1	5	P27659 [129-136]	P27659 1xCarbamidomethyl [C134]	2	1045.55	High	n/a	High		7.473e-05		0.0006593	1.67
P27659	60S ribosomal protein L3 OS=Mus musculus OX=10090 GN=Rpl3 PE=1 SV=3	[K].AFTKYCK.[K]	1xCarbamidomethyl [C6]	0.0167974	0.000588561	1	1	1	3	P27659 [129-135]	P27659 1xCarbamidomethyl [C134]	1	917.455	High	n/a	High		0.0001725		0.001703	1.66
P27659	60S ribosomal protein L3 OS=Mus musculus OX=10090 GN=Rpl3 PE=1 SV=3	[R].GLRKVACIGAWHPAR.[V]	1xCarbamidomethyl [C7]	5.56058e-07	3.46687e-05	1	1	1	14	P27659 [247-261]	P27659 1xCarbamidomethyl [C253]	2	1691.93	High	n/a	High		7.935e-06		3.476e-08	4.52
P27659	60S ribosomal protein L3 OS=Mus musculus OX=10090 GN=Rpl3 PE=1 SV=3	[K].DFNSMKKYCQVIR.[I]	1xCarbamidomethyl [C9]	1.1321e-07	3.46687e-05	1	1	1	10	P27659 [149-161]	P27659 1xCarbamidomethyl [C157]	2	1688.82	High	n/a	High		7.935e-06		6.447e-09	3.75
P27659	60S ribosomal protein L3 OS=Mus musculus OX=10090 GN=Rpl3 PE=1 SV=3	[K].DFNSMKKYCQVIR.[I]	1xCarbamidomethyl [C9]; 1xOxidation [M5]	1.02701e-06	3.46687e-05	1	1	1	6	P27659 [149-161]	P27659 1xCarbamidomethyl [C157]	2	1704.82	High	n/a	High		7.935e-06		6.647e-08	3.98
P62889	60S ribosomal protein L30 OS=Mus musculus OX=10090 GN=Rpl30 PE=1 SV=2	[K].AKLVILANNCPALR.[K]	1xCarbamidomethyl [C10]	7.79876e-06	3.46687e-05	1	1	1	8	P62889 [43-56]	P62889 1xCarbamidomethyl [C52]	1	1552.9	High	n/a	High		7.935e-06		5.651e-07	4.03
P62889	60S ribosomal protein L30 OS=Mus musculus OX=10090 GN=Rpl30 PE=1 SV=2	[K].AKLVILANNCPALRK.[S]	1xCarbamidomethyl [C10]	2.61144e-07	3.46687e-05	1	1	1	1	P62889 [43-57]	P62889 1xCarbamidomethyl [C52]	2	1680.99	High	n/a	High		7.935e-06		1.565e-08	3.3
P62889	60S ribosomal protein L30 OS=Mus musculus OX=10090 GN=Rpl30 PE=1 SV=2	[K].TGVHHYSGNNIELGTACGK.[Y]	1xCarbamidomethyl [C17]	2.87645e-10	3.46687e-05	1	1	1	7	P62889 [69-87]	P62889 1xCarbamidomethyl [C85]	0	2014.94	High	n/a	High		7.935e-06		1.181e-11	4.8
P62889	60S ribosomal protein L30 OS=Mus musculus OX=10090 GN=Rpl30 PE=1 SV=2	[K].TGVHHYSGNNIELGTACGKYYR.[V]	1xCarbamidomethyl [C17]	0.000939405	7.02174e-05	1	1	1	1	P62889 [69-90]	P62889 1xCarbamidomethyl [C85]	1	2497.17	High	n/a	High		1.496e-05		8.635e-05	1.67
P62889	60S ribosomal protein L30 OS=Mus musculus OX=10090 GN=Rpl30 PE=1 SV=2	[R].VCTLAIIDPGDSDIIR.[S]	1xCarbamidomethyl [C2]	4.29667e-07	3.46687e-05	1	1	1	27	P62889 [91-106]	P62889 1xCarbamidomethyl [C92]	0	1757.91	High	n/a	High		7.935e-06		2.644e-08	3.57
P62889	60S ribosomal protein L30 OS=Mus musculus OX=10090 GN=Rpl30 PE=1 SV=2	[K].YYRVCTLAIIDPGDSDIIR.[S]	1xCarbamidomethyl [C5]	5.76409e-06	3.46687e-05	1	1	1	2	P62889 [88-106]	P62889 1xCarbamidomethyl [C92]	1	2240.14	High	n/a	High		7.935e-06		4.099e-07	4.66
P62889	60S ribosomal protein L30 OS=Mus musculus OX=10090 GN=Rpl30 PE=1 SV=2	[K].LVILANNCPALRK.[S]	1xCarbamidomethyl [C8]	1.60197e-06	3.46687e-05	1	1	1	4	P62889 [45-57]	P62889 1xCarbamidomethyl [C52]	1	1481.86	High	n/a	High		7.935e-06		1.062e-07	4.27
P62889	60S ribosomal protein L30 OS=Mus musculus OX=10090 GN=Rpl30 PE=1 SV=2	[K].LVILANNCPALR.[K]	1xCarbamidomethyl [C8]	4.22396e-05	3.46687e-05	1	1	1	58	P62889 [45-56]	P62889 1xCarbamidomethyl [C52]	0	1353.77	High	n/a	High		7.935e-06		3.357e-06	3.65
P62911	60S ribosomal protein L32 OS=Mus musculus OX=10090 GN=Rpl32 PE=1 SV=2	[K].FLVHNVKELEVLLMCNK.[S]	1xCarbamidomethyl [C15]; 1xOxidation [M14]	1.24937e-05	3.46687e-05	1	1	1	1	P62911 [77-93]	P62911 1xCarbamidomethyl [C91]	1	2102.11	High	n/a	High		7.935e-06		9.275e-07	3.78
P62911	60S ribosomal protein L32 OS=Mus musculus OX=10090 GN=Rpl32 PE=1 SV=2	[K].SYCAEIAHNVSSKNRK.[A]	1xCarbamidomethyl [C3]	3.22769e-11	3.46687e-05	1	1	1	1	P62911 [94-109]	P62911 1xCarbamidomethyl [C96]	2	1863.91	High	n/a	High		7.935e-06		1.18e-12	3.3
P62911	60S ribosomal protein L32 OS=Mus musculus OX=10090 GN=Rpl32 PE=1 SV=2	[K].SYCAEIAHNVSSK.[N]	1xCarbamidomethyl [C3]	6.01923e-09	3.46687e-05	1	1	1	21	P62911 [94-106]	P62911 1xCarbamidomethyl [C96]	0	1465.67	High	n/a	High		7.935e-06		2.922e-10	3.28
P62911	60S ribosomal protein L32 OS=Mus musculus OX=10090 GN=Rpl32 PE=1 SV=2	[K].SYCAEIAHNVSSKNR.[K]	1xCarbamidomethyl [C3]	0.00467673	0.000259952	1	1	1	1	P62911 [94-108]	P62911 1xCarbamidomethyl [C96]	1	1735.82	High	n/a	High		5.844e-05		0.0004484	1.7
P62911	60S ribosomal protein L32 OS=Mus musculus OX=10090 GN=Rpl32 PE=1 SV=2	[K].ELEVLLMCNK.[S]	1xCarbamidomethyl [C8]	0.000205586	3.46687e-05	1	1	1	10	P62911 [84-93]	P62911 1xCarbamidomethyl [C91]	0	1248.63	High	n/a	High		7.935e-06		1.771e-05	1.86
P62911	60S ribosomal protein L32 OS=Mus musculus OX=10090 GN=Rpl32 PE=1 SV=2	[K].ELEVLLMCNK.[S]	1xCarbamidomethyl [C8]; 1xOxidation [M7]	8.08347e-05	3.46687e-05	1	1	1	6	P62911 [84-93]	P62911 1xCarbamidomethyl [C91]	0	1264.63	High	n/a	High		7.935e-06		6.608e-06	2.91
P62911	60S ribosomal protein L32 OS=Mus musculus OX=10090 GN=Rpl32 PE=1 SV=2	[K].FLVHNVKELEVLLMCNKSYCAEIAHNVSSK.[N]	2xCarbamidomethyl [C15; C20]; 1xOxidation [M14]	9.22714e-08	3.46687e-05	1	1	1	1	P62911 [77-106]	P62911 2xCarbamidomethyl [C91; C96]	2	3548.77	High	n/a	High		7.935e-06		5.233e-09	5.11
P62911	60S ribosomal protein L32 OS=Mus musculus OX=10090 GN=Rpl32 PE=1 SV=2	[K].ELEVLLMCNKSYCAEIAHNVSSK.[N]	2xCarbamidomethyl [C8; C13]	4.29337e-09	3.46687e-05	1	1	1	2	P62911 [84-106]	P62911 2xCarbamidomethyl [C91; C96]	1	2695.29	High	n/a	High		7.935e-06		2.049e-10	3.72
Q9D1R9	60S ribosomal protein L34 OS=Mus musculus OX=10090 GN=Rpl34 PE=1 SV=2	[R].AYGGSMCAK.[C]	1xCarbamidomethyl [C7]	0.00115222	7.02174e-05	1	1	1	24	Q9D1R9 [77-85]	Q9D1R9 1xCarbamidomethyl [C83]	0	944.396	High	n/a	High		1.496e-05		0.0001071	1.39
Q9D1R9	60S ribosomal protein L34 OS=Mus musculus OX=10090 GN=Rpl34 PE=1 SV=2	[R].AYGGSMCAK.[C]	1xCarbamidomethyl [C7]; 1xOxidation [M6]	0.00435697	0.000259952	1	1	1	9	Q9D1R9 [77-85]	Q9D1R9 1xCarbamidomethyl [C83]	0	960.391	High	Low	High	0.7035	5.247e-05	0.9962	0.0004179	1.7	17
Q9D1R9	60S ribosomal protein L34 OS=Mus musculus OX=10090 GN=Rpl34 PE=1 SV=2	[K].SACGVCPGRLRGVR.[A]	2xCarbamidomethyl [C3; C6]	1.66059e-05	3.46687e-05	1	1	1	1	Q9D1R9 [44-57]	Q9D1R9 2xCarbamidomethyl [C46; C49]	2	1544.79	High	n/a	High		7.935e-06		1.247e-06	2.61
Q9D1R9	60S ribosomal protein L34 OS=Mus musculus OX=10090 GN=Rpl34 PE=1 SV=2	[K].SACGVCPGRLR.[G]	2xCarbamidomethyl [C3; C6]	1.06459e-05	3.46687e-05	1	1	1	6	Q9D1R9 [44-54]	Q9D1R9 2xCarbamidomethyl [C46; C49]	1	1232.6	High	n/a	High		7.935e-06		7.786e-07	1.88
Q9D1R9	60S ribosomal protein L34 OS=Mus musculus OX=10090 GN=Rpl34 PE=1 SV=2	[K].SACGVCPGR.[L]	2xCarbamidomethyl [C3; C6]	0.00132804	0.000106916	1	1	1	31	Q9D1R9 [44-52]	Q9D1R9 2xCarbamidomethyl [C46; C49]	0	963.413	High	n/a	High		2.232e-05		0.000124	2.33
Q9D1R9	60S ribosomal protein L34 OS=Mus musculus OX=10090 GN=Rpl34 PE=1 SV=2	[K].APKSACGVCPGR.[L]	2xCarbamidomethyl [C6; C9]	1.93156e-05	3.46687e-05	1	1	1	9	Q9D1R9 [41-52]	Q9D1R9 2xCarbamidomethyl [C46; C49]	1	1259.6	High	n/a	High		7.935e-06		1.464e-06	1.83
Q9D1R9	60S ribosomal protein L34 OS=Mus musculus OX=10090 GN=Rpl34 PE=1 SV=2	[K].APKSACGVCPGRLR.[G]	2xCarbamidomethyl [C6; C9]	8.22304e-07	3.46687e-05	1	1	1	1	Q9D1R9 [41-54]	Q9D1R9 2xCarbamidomethyl [C46; C49]	2	1528.78	High	n/a	High		7.935e-06		5.248e-08	3.9
Q9D1R9	60S ribosomal protein L34 OS=Mus musculus OX=10090 GN=Rpl34 PE=1 SV=2	[R].AYGGSMCAKCVRDR.[I]	2xCarbamidomethyl [C7; C10]	1.2946e-05	3.46687e-05	1	1	1	2	Q9D1R9 [77-90]	Q9D1R9 2xCarbamidomethyl [C83; C86]	2	1630.72	High	n/a	High		7.935e-06		9.579e-07	2.99
Q9D1R9	60S ribosomal protein L34 OS=Mus musculus OX=10090 GN=Rpl34 PE=1 SV=2	[R].AYGGSMCAKCVR.[D]	2xCarbamidomethyl [C7; C10]	2.07242e-07	3.46687e-05	1	1	1	4	Q9D1R9 [77-88]	Q9D1R9 2xCarbamidomethyl [C83; C86]	1	1359.6	High	n/a	High		7.935e-06		1.23e-08	3.62
Q9D1R9	60S ribosomal protein L34 OS=Mus musculus OX=10090 GN=Rpl34 PE=1 SV=2	[R].AYGGSMCAKCVR.[D]	2xCarbamidomethyl [C7; C10]; 1xOxidation [M6]	5.18242e-05	3.46687e-05	1	1	1	4	Q9D1R9 [77-88]	Q9D1R9 2xCarbamidomethyl [C83; C86]	1	1375.59	High	n/a	High		7.935e-06		4.139e-06	2.83
Q9D1R9	60S ribosomal protein L34 OS=Mus musculus OX=10090 GN=Rpl34 PE=1 SV=2	[R].AYGGSMCAKCVRDR.[I]	2xCarbamidomethyl [C7; C10]; 1xOxidation [M6]	0.0731916	0.00230564	1	1	1	1	Q9D1R9 [77-90]	Q9D1R9 2xCarbamidomethyl [C83; C86]	2	1646.72	High	n/a	High		0.0006241		0.009464	1.49
O55142	60S ribosomal protein L35a OS=Mus musculus OX=10090 GN=Rpl35a PE=1 SV=2	[R].DETEFYLGKRCAYVYK.[A]	1xCarbamidomethyl [C11]	1.03618e-06	3.46687e-05	1	1	1	1	O55142 [37-52]	O55142 1xCarbamidomethyl [C47]	2	2041.97	High	n/a	High		7.935e-06		6.707e-08	3.54
O55142	60S ribosomal protein L35a OS=Mus musculus OX=10090 GN=Rpl35a PE=1 SV=2	[K].RCAYVYK.[A]	1xCarbamidomethyl [C2]	0.189158	0.00667313	1	1	1	2	O55142 [46-52]	O55142 1xCarbamidomethyl [C47]	1	959.477	High	n/a	High		0.001667		0.03605	1.92
P47964	60S ribosomal protein L36 OS=Mus musculus OX=10090 GN=Rpl36 PE=1 SV=2	[K].FVRDMIREVCGFAPYER.[R]	1xCarbamidomethyl [C10]	5.70652e-09	3.46687e-05	1	1	1	7	P47964 [39-55]	P47964 1xCarbamidomethyl [C48]	2	2145.04	High	n/a	High		7.935e-06		2.763e-10	6.07
P47964	60S ribosomal protein L36 OS=Mus musculus OX=10090 GN=Rpl36 PE=1 SV=2	[K].FVRDMIREVCGFAPYER.[R]	1xCarbamidomethyl [C10]; 1xOxidation [M5]	2.43306e-06	3.46687e-05	1	1	1	13	P47964 [39-55]	P47964 1xCarbamidomethyl [C48]	2	2161.03	High	n/a	High		7.935e-06		1.645e-07	3.38
P47964	60S ribosomal protein L36 OS=Mus musculus OX=10090 GN=Rpl36 PE=1 SV=2	[R].EVCGFAPYER.[R]	1xCarbamidomethyl [C3]	0.000688432	3.46687e-05	1	1	1	8	P47964 [46-55]	P47964 1xCarbamidomethyl [C48]	0	1227.55	High	n/a	High		7.935e-06		6.276e-05	2.72
P47964	60S ribosomal protein L36 OS=Mus musculus OX=10090 GN=Rpl36 PE=1 SV=2	[R].DMIREVCGFAPYER.[R]	1xCarbamidomethyl [C7]	4.82133e-08	3.46687e-05	1	1	1	16	P47964 [42-55]	P47964 1xCarbamidomethyl [C48]	1	1742.8	High	n/a	High		7.935e-06		2.64e-09	3.16
P47964	60S ribosomal protein L36 OS=Mus musculus OX=10090 GN=Rpl36 PE=1 SV=2	[R].DMIREVCGFAPYER.[R]	1xCarbamidomethyl [C7]; 1xOxidation [M2]	5.56268e-06	3.46687e-05	1	1	1	17	P47964 [42-55]	P47964 1xCarbamidomethyl [C48]	1	1758.79	High	n/a	High		7.935e-06		3.932e-07	4.16
P83882	60S ribosomal protein L36a OS=Mus musculus OX=10090 GN=Rpl36a PE=3 SV=2	[R].CKHFELGGDK.[K]	1xCarbamidomethyl [C1]	0.000224697	3.46687e-05	1	1	1	2	P83882 [88-97]	P83882 1xCarbamidomethyl [C88]	1	1190.56	High	n/a	High		7.935e-06		1.947e-05	2.19
P83882	60S ribosomal protein L36a OS=Mus musculus OX=10090 GN=Rpl36a PE=3 SV=2	[R].TFCKKCGK.[H]	2xCarbamidomethyl [C3; C6]	0.000844453	7.02174e-05	1	1	1	14	P83882 [10-17]	P83882 2xCarbamidomethyl [C12; C15]	2	1028.5	High	n/a	High		1.496e-05		7.766e-05	1.43
P83882	60S ribosomal protein L36a OS=Mus musculus OX=10090 GN=Rpl36a PE=3 SV=2	[R].LECVEPNCR.[S]	2xCarbamidomethyl [C3; C8]	0.00212536	0.000136771	1	1	1	5	P83882 [70-78]	P83882 2xCarbamidomethyl [C72; C77]	0	1176.51	High	n/a	High		2.796e-05		0.0002013	2.94
P83882	60S ribosomal protein L36a OS=Mus musculus OX=10090 GN=Rpl36a PE=3 SV=2	[K].KIVLRLECVEPNCR.[S]	2xCarbamidomethyl [C8; C13]	5.32251e-05	3.46687e-05	1	1	1	1	P83882 [65-78]	P83882 2xCarbamidomethyl [C72; C77]	2	1785.95	High	n/a	High		7.935e-06		4.285e-06	3.79
Q9D823	60S ribosomal protein L37 OS=Mus musculus OX=10090 GN=Rpl37 PE=3 SV=3	[K].THTLCRR.[C]	1xCarbamidomethyl [C5]	0.0417237	0.00121876	1	1	1	15	Q9D823 [15-21]	Q9D823 1xCarbamidomethyl [C19]	1	943.489	High	n/a	High		0.0003526		0.004702	1.17
Q9D823	60S ribosomal protein L37 OS=Mus musculus OX=10090 GN=Rpl37 PE=3 SV=3	[R].NKTHTLCR.[R]	1xCarbamidomethyl [C7]	0.00690176	0.000314522	1	1	1	4	Q9D823 [13-20]	Q9D823 1xCarbamidomethyl [C19]	1	1029.53	High	n/a	High		7.473e-05		0.0006677	2.11
Q9D823	60S ribosomal protein L37 OS=Mus musculus OX=10090 GN=Rpl37 PE=3 SV=3	[K].AYHLQKSTCGK.[C]	1xCarbamidomethyl [C9]	8.52638e-05	3.46687e-05	1	1	1	2	Q9D823 [26-36]	Q9D823 1xCarbamidomethyl [C34]	1	1292.64	High	n/a	High		7.935e-06		7.037e-06	2.89
Q9D823	60S ribosomal protein L37 OS=Mus musculus OX=10090 GN=Rpl37 PE=3 SV=3	[K].STCGKCGYPAK.[R]	2xCarbamidomethyl [C3; C6]	9.07138e-06	3.46687e-05	1	1	1	19	Q9D823 [32-42]	Q9D823 2xCarbamidomethyl [C34; C37]	1	1228.54	High	n/a	High		7.935e-06		6.629e-07	2.85
Q9D823	60S ribosomal protein L37 OS=Mus musculus OX=10090 GN=Rpl37 PE=3 SV=3	[K].STCGKCGYPAKR.[K]	2xCarbamidomethyl [C3; C6]	0.0389668	0.00116639	1	1	1	2	Q9D823 [32-43]	Q9D823 2xCarbamidomethyl [C34; C37]	2	1384.65	High	n/a	High		0.0003331		0.004331	0.79
P61514	60S ribosomal protein L37a OS=Mus musculus OX=10090 GN=Rpl37a PE=1 SV=2	[K].YTCSFCGKTK.[M]	2xCarbamidomethyl [C3; C6]	0.000323491	3.46687e-05	1	1	1	2	P61514 [37-46]	P61514 2xCarbamidomethyl [C39; C42]	1	1251.55	High	n/a	High		7.935e-06		2.842e-05	1.32
P61514	60S ribosomal protein L37a OS=Mus musculus OX=10090 GN=Rpl37a PE=1 SV=2	[K].YTCSFCGK.[T]	2xCarbamidomethyl [C3; C6]	0.00416829	0.000259952	1	1	1	19	P61514 [37-44]	P61514 2xCarbamidomethyl [C39; C42]	0	1022.41	High	n/a	High		5.247e-05		0.0003971	1.65
P61514	60S ribosomal protein L37a OS=Mus musculus OX=10090 GN=Rpl37a PE=1 SV=2	[R].AVGIWHCGSCMK.[T]	2xCarbamidomethyl [C7; C10]	1.75094e-06	3.46687e-05	1	1	1	21	P61514 [51-62]	P61514 2xCarbamidomethyl [C57; C60]	0	1405.62	High	n/a	High		7.935e-06		1.163e-07	2.97
P61514	60S ribosomal protein L37a OS=Mus musculus OX=10090 GN=Rpl37a PE=1 SV=2	[R].AVGIWHCGSCMK.[T]	2xCarbamidomethyl [C7; C10]; 1xOxidation [M11]	4.49201e-07	3.46687e-05	1	1	1	17	P61514 [51-62]	P61514 2xCarbamidomethyl [C57; C60]	0	1421.61	High	n/a	High		7.935e-06		2.767e-08	2.2
P61514	60S ribosomal protein L37a OS=Mus musculus OX=10090 GN=Rpl37a PE=1 SV=2	[R].RAVGIWHCGSCMK.[T]	2xCarbamidomethyl [C8; C11]	5.04436e-06	3.46687e-05	1	1	1	3	P61514 [50-62]	P61514 2xCarbamidomethyl [C57; C60]	1	1561.72	High	n/a	High		7.935e-06		3.557e-07	3.32
P61514	60S ribosomal protein L37a OS=Mus musculus OX=10090 GN=Rpl37a PE=1 SV=2	[R].RAVGIWHCGSCMK.[T]	2xCarbamidomethyl [C8; C11]; 1xOxidation [M12]	0.0240282	0.000834203	1	1	1	1	P61514 [50-62]	P61514 2xCarbamidomethyl [C57; C60]	1	1577.71	High	n/a	High		0.000246		0.002505	1.88
Q9D8E6	60S ribosomal protein L4 OS=Mus musculus OX=10090 GN=Rpl4 PE=1 SV=3	[R].SGQGAFGNMCRGGRMFAPTK.[T]	1xCarbamidomethyl [C10]	2.88189e-05	3.46687e-05	1	1	1	8	Q9D8E6 [87-106]	Q9D8E6 1xCarbamidomethyl [C96]	2	2129.98	High	n/a	High		7.935e-06		2.243e-06	4
Q9D8E6	60S ribosomal protein L4 OS=Mus musculus OX=10090 GN=Rpl4 PE=1 SV=3	[R].SGQGAFGNMCRGGR.[M]	1xCarbamidomethyl [C10]	1.7042e-07	3.46687e-05	1	1	1	24	Q9D8E6 [87-100]	Q9D8E6 1xCarbamidomethyl [C96]	1	1454.64	High	n/a	High		7.935e-06		9.986e-09	3.54
Q9D8E6	60S ribosomal protein L4 OS=Mus musculus OX=10090 GN=Rpl4 PE=1 SV=3	[R].SGQGAFGNMCR.[G]	1xCarbamidomethyl [C10]	0.000101856	3.46687e-05	1	1	1	27	Q9D8E6 [87-97]	Q9D8E6 1xCarbamidomethyl [C96]	0	1184.49	High	n/a	High		7.935e-06		8.47e-06	2.02
Q9D8E6	60S ribosomal protein L4 OS=Mus musculus OX=10090 GN=Rpl4 PE=1 SV=3	[R].SGQGAFGNMCRGGRMFAPTK.[T]	1xCarbamidomethyl [C10]; 1xOxidation [M]	0.000786539	7.02174e-05	1	1	2	4	Q9D8E6 [87-106]	Q9D8E6 1xCarbamidomethyl [C96]	2	2145.97	High	n/a	High		1.496e-05		7.204e-05	1.32
Q9D8E6	60S ribosomal protein L4 OS=Mus musculus OX=10090 GN=Rpl4 PE=1 SV=3	[R].SGQGAFGNMCRGGR.[M]	1xCarbamidomethyl [C10]; 1xOxidation [M9]	7.00685e-07	3.46687e-05	1	1	1	16	Q9D8E6 [87-100]	Q9D8E6 1xCarbamidomethyl [C96]	1	1470.63	High	Low	High	0.7585	7.935e-06	1	4.421e-08	1.1	26
Q9D8E6	60S ribosomal protein L4 OS=Mus musculus OX=10090 GN=Rpl4 PE=1 SV=3	[R].SGQGAFGNMCR.[G]	1xCarbamidomethyl [C10]; 1xOxidation [M9]	4.45542e-05	3.46687e-05	1	1	1	26	Q9D8E6 [87-97]	Q9D8E6 1xCarbamidomethyl [C96]	0	1200.49	High	n/a	High		7.935e-06		3.532e-06	2.51
Q9D8E6	60S ribosomal protein L4 OS=Mus musculus OX=10090 GN=Rpl4 PE=1 SV=3	[R].SGQGAFGNMCRGGRMFAPTK.[T]	1xCarbamidomethyl [C10]; 2xOxidation [M9; M15]	0.212991	0.00771848	1	1	1	1	Q9D8E6 [87-106]	Q9D8E6 1xCarbamidomethyl [C96]	2	2161.97	High	n/a	High		0.001911		0.04342	2.23
Q9D8E6	60S ribosomal protein L4 OS=Mus musculus OX=10090 GN=Rpl4 PE=1 SV=3	[K].LAPGGHVGRFCIWTESAFR.[K]	1xCarbamidomethyl [C11]	6.93949e-09	3.46687e-05	1	1	1	11	Q9D8E6 [240-258]	Q9D8E6 1xCarbamidomethyl [C250]	1	2161.08	High	n/a	High		7.935e-06		3.4e-10	3.16
Q9D8E6	60S ribosomal protein L4 OS=Mus musculus OX=10090 GN=Rpl4 PE=1 SV=3	[R].VNTTQKRYAICSALAASALPALVMSK.[G]	1xCarbamidomethyl [C11]	6.01923e-09	3.46687e-05	1	1	1	9	Q9D8E6 [115-140]	Q9D8E6 1xCarbamidomethyl [C125]	2	2764.48	High	n/a	High		7.935e-06		2.915e-10	6
Q9D8E6	60S ribosomal protein L4 OS=Mus musculus OX=10090 GN=Rpl4 PE=1 SV=3	[R].VNTTQKRYAICSALAASALPALVMSK.[G]	1xCarbamidomethyl [C11]; 1xOxidation [M24]	4.07188e-08	3.46687e-05	1	1	1	10	Q9D8E6 [115-140]	Q9D8E6 1xCarbamidomethyl [C125]	2	2780.48	High	n/a	High		7.935e-06		2.2e-09	5.82
Q9D8E6	60S ribosomal protein L4 OS=Mus musculus OX=10090 GN=Rpl4 PE=1 SV=3	[R].GGGTHRSGQGAFGNMCR.[G]	1xCarbamidomethyl [C16]	1.01713e-08	3.46687e-05	1	1	1	1	Q9D8E6 [81-97]	Q9D8E6 1xCarbamidomethyl [C96]	1	1749.77	High	n/a	High		7.935e-06		5.116e-10	4.34
Q9D8E6	60S ribosomal protein L4 OS=Mus musculus OX=10090 GN=Rpl4 PE=1 SV=3	[R].FCIWTESAFR.[K]	1xCarbamidomethyl [C2]	2.83109e-05	3.46687e-05	1	1	1	42	Q9D8E6 [249-258]	Q9D8E6 1xCarbamidomethyl [C250]	0	1316.61	High	n/a	High		7.935e-06		2.192e-06	1.89
Q9D8E6	60S ribosomal protein L4 OS=Mus musculus OX=10090 GN=Rpl4 PE=1 SV=3	[R].GPCIIYNEDNGIIK.[A]	1xCarbamidomethyl [C3]	1.68976e-06	3.46687e-05	1	1	1	20	Q9D8E6 [206-219]	Q9D8E6 1xCarbamidomethyl [C208]	0	1605.79	High	n/a	High		7.935e-06		1.122e-07	2.2
Q9D8E6	60S ribosomal protein L4 OS=Mus musculus OX=10090 GN=Rpl4 PE=1 SV=3	[-].MACARPLISVYSEKGESSGKNVTLPAVFK.[A]	1xCarbamidomethyl [C3]; 1xMet-loss+Acetyl [N-Term]	8.45091e-05	3.46687e-05	1	1	1	1	Q9D8E6 [1-29]	Q9D8E6 1xCarbamidomethyl [C3]; 1xMet-loss+Acetyl [N-Term]	2	3050.6	High	n/a	High		0.0002131		0.0003337	6.11
Q9D8E6	60S ribosomal protein L4 OS=Mus musculus OX=10090 GN=Rpl4 PE=1 SV=3	[-].MACARPLISVYSEKGESSGK.[N]	1xCarbamidomethyl [C3]; 1xMet-loss+Acetyl [N-Term]	2.20381e-09	3.46687e-05	1	1	1	4	Q9D8E6 [1-20]	Q9D8E6 1xCarbamidomethyl [C3]; 1xMet-loss+Acetyl [N-Term]	1	2081.03	High	n/a	High		0.0002131		5.612e-07	6.65
Q9D8E6	60S ribosomal protein L4 OS=Mus musculus OX=10090 GN=Rpl4 PE=1 SV=3	[-].MACARPLISVYSEK.[G]	1xCarbamidomethyl [C3]; 1xMet-loss+Acetyl [N-Term]	3.12198e-05	3.46687e-05	1	1	1	12	Q9D8E6 [1-14]	Q9D8E6 1xCarbamidomethyl [C3]; 1xMet-loss+Acetyl [N-Term]	0	1535.79	High	n/a	High		0.0002131		0.0001829	4.56
Q9D8E6	60S ribosomal protein L4 OS=Mus musculus OX=10090 GN=Rpl4 PE=1 SV=3	[R].YAICSALAASALPALVMSK.[G]	1xCarbamidomethyl [C4]	4.52865e-09	3.46687e-05	1	1	1	23	Q9D8E6 [122-140]	Q9D8E6 1xCarbamidomethyl [C125]	0	1937.02	High	n/a	High		7.935e-06		2.167e-10	5.08
Q9D8E6	60S ribosomal protein L4 OS=Mus musculus OX=10090 GN=Rpl4 PE=1 SV=3	[R].RGPCIIYNEDNGIIK.[A]	1xCarbamidomethyl [C4]	1.60256e-05	3.46687e-05	1	1	1	15	Q9D8E6 [205-219]	Q9D8E6 1xCarbamidomethyl [C208]	1	1761.9	High	n/a	High		7.935e-06		1.207e-06	4.28
Q9D8E6	60S ribosomal protein L4 OS=Mus musculus OX=10090 GN=Rpl4 PE=1 SV=3	[R].YAICSALAASALPALVMSK.[G]	1xCarbamidomethyl [C4]; 1xOxidation [M17]	1.99847e-09	3.46687e-05	1	1	1	30	Q9D8E6 [122-140]	Q9D8E6 1xCarbamidomethyl [C125]	0	1953.02	High	n/a	High		7.935e-06		9.104e-11	3.73
Q9D8E6	60S ribosomal protein L4 OS=Mus musculus OX=10090 GN=Rpl4 PE=1 SV=3	[K].RYAICSALAASALPALVMSK.[G]	1xCarbamidomethyl [C5]	8.9013e-09	3.46687e-05	1	1	1	8	Q9D8E6 [121-140]	Q9D8E6 1xCarbamidomethyl [C125]	1	2093.12	High	n/a	High		7.935e-06		4.417e-10	5.73
Q9D8E6	60S ribosomal protein L4 OS=Mus musculus OX=10090 GN=Rpl4 PE=1 SV=3	[K].RYAICSALAASALPALVMSK.[G]	1xCarbamidomethyl [C5]; 1xOxidation [M18]	8.51096e-10	3.46687e-05	1	1	1	11	Q9D8E6 [121-140]	Q9D8E6 1xCarbamidomethyl [C125]	1	2109.12	High	n/a	High		7.935e-06		3.711e-11	5.59
Q9D8E6	60S ribosomal protein L4 OS=Mus musculus OX=10090 GN=Rpl4 PE=1 SV=3	[R].IQRRGPCIIYNEDNGIIK.[A]	1xCarbamidomethyl [C7]	2.54367e-06	3.46687e-05	1	1	1	11	Q9D8E6 [202-219]	Q9D8E6 1xCarbamidomethyl [C208]	2	2159.14	High	n/a	High		7.935e-06		1.724e-07	3.77
P47962	60S ribosomal protein L5 OS=Mus musculus OX=10090 GN=Rpl5 PE=1 SV=3	[K].VGLTNYAAAYCTGLLLARRLLNR.[F]	1xCarbamidomethyl [C11]	2.43213e-07	3.46687e-05	1	1	1	1	P47962 [90-112]	P47962 1xCarbamidomethyl [C100]	2	2579.42	High	n/a	High		7.935e-06		1.453e-08	6.08
P47962	60S ribosomal protein L5 OS=Mus musculus OX=10090 GN=Rpl5 PE=1 SV=3	[K].VGLTNYAAAYCTGLLLARR.[L]	1xCarbamidomethyl [C11]	6.46549e-08	3.46687e-05	1	1	1	4	P47962 [90-108]	P47962 1xCarbamidomethyl [C100]	1	2083.11	High	n/a	High		7.935e-06		3.587e-09	4.85
P47962	60S ribosomal protein L5 OS=Mus musculus OX=10090 GN=Rpl5 PE=1 SV=3	[K].VGLTNYAAAYCTGLLLAR.[R]	1xCarbamidomethyl [C11]	6.93682e-10	3.46687e-05	1	1	1	40	P47962 [90-107]	P47962 1xCarbamidomethyl [C100]	0	1927.01	High	n/a	High		7.935e-06		3.008e-11	3.64
P47962	60S ribosomal protein L5 OS=Mus musculus OX=10090 GN=Rpl5 PE=1 SV=3	[R].DIICQIAYAR.[I]	1xCarbamidomethyl [C4]	0.00176413	0.000136771	1	1	1	6	P47962 [59-68]	P47962 1xCarbamidomethyl [C62]	0	1222.62	High	n/a	High		2.796e-05		0.0001658	2.68
P47962	60S ribosomal protein L5 OS=Mus musculus OX=10090 GN=Rpl5 PE=1 SV=3	[R].IEGDMIVCAAYAHELPK.[Y]	1xCarbamidomethyl [C8]	2.49596e-09	3.46687e-05	1	1	1	13	P47962 [69-85]	P47962 1xCarbamidomethyl [C76]	0	1916.92	High	n/a	High		7.935e-06		1.156e-10	4.64
P47962	60S ribosomal protein L5 OS=Mus musculus OX=10090 GN=Rpl5 PE=1 SV=3	[R].VTNRDIICQIAYAR.[I]	1xCarbamidomethyl [C8]	1.43929e-07	3.46687e-05	1	1	1	14	P47962 [55-68]	P47962 1xCarbamidomethyl [C62]	1	1692.88	High	n/a	High		7.935e-06		8.345e-09	4.99
P47962	60S ribosomal protein L5 OS=Mus musculus OX=10090 GN=Rpl5 PE=1 SV=3	[R].IEGDMIVCAAYAHELPK.[Y]	1xCarbamidomethyl [C8]; 1xOxidation [M5]	5.70871e-08	3.46687e-05	1	1	1	10	P47962 [69-85]	P47962 1xCarbamidomethyl [C76]	0	1932.92	High	n/a	High		7.935e-06		3.149e-09	3.2
P47911	60S ribosomal protein L6 OS=Mus musculus OX=10090 GN=Rpl6 PE=1 SV=3	[K].AKPHCSRNPVLVR.[G]	1xCarbamidomethyl [C5]	2.00149e-05	3.46687e-05	1	1	1	10	P47911 [47-59]	P47911 1xCarbamidomethyl [C51]	1	1533.84	High	n/a	High		7.935e-06		1.526e-06	1.12
P14148	60S ribosomal protein L7 OS=Mus musculus OX=10090 GN=Rpl7 PE=1 SV=2	[K].FGIICMEDLIHEIYTVGK.[R]	1xCarbamidomethyl [C5]	1.01753e-07	3.46687e-05	1	1	1	2	P14148 [204-221]	P14148 1xCarbamidomethyl [C208]	0	2138.07	High	n/a	High		7.935e-06		5.783e-09	4.73
P14148	60S ribosomal protein L7 OS=Mus musculus OX=10090 GN=Rpl7 PE=1 SV=2	[K].FGIICMEDLIHEIYTVGK.[R]	1xCarbamidomethyl [C5]; 1xOxidation [M6]	4.698e-06	3.46687e-05	1	1	1	1	P14148 [204-221]	P14148 1xCarbamidomethyl [C208]	0	2154.06	High	n/a	High		7.935e-06		3.287e-07	3.19
P14148	60S ribosomal protein L7 OS=Mus musculus OX=10090 GN=Rpl7 PE=1 SV=2	[R].SLGKFGIICMEDLIHEIYTVGKR.[F]	1xCarbamidomethyl [C9]; 1xOxidation [M10]	1.32911e-06	3.46687e-05	1	1	1	2	P14148 [200-222]	P14148 1xCarbamidomethyl [C208]	2	2695.39	High	n/a	High		7.935e-06		8.68e-08	3.96
P14148	60S ribosomal protein L7 OS=Mus musculus OX=10090 GN=Rpl7 PE=1 SV=2	[R].SLGKFGIICMEDLIHEIYTVGK.[R]	1xCarbamidomethyl [C9]; 1xOxidation [M10]	6.19098e-05	3.46687e-05	1	1	1	1	P14148 [200-221]	P14148 1xCarbamidomethyl [C208]	1	2539.29	High	n/a	High		7.935e-06		4.984e-06	2.34
P12970	60S ribosomal protein L7a OS=Mus musculus OX=10090 GN=Rpl7a PE=1 SV=2	[R].LGHLVHRKTCTTVAFTQVNSEDK.[G]	1xCarbamidomethyl [C10]	9.72157e-11	3.46687e-05	1	1	1	16	P12970 [190-212]	P12970 1xCarbamidomethyl [C199]	2	2641.35	High	n/a	High		7.935e-06		3.761e-12	6.93
P12970	60S ribosomal protein L7a OS=Mus musculus OX=10090 GN=Rpl7a PE=1 SV=2	[K].TCTTVAFTQVNSEDKGALAK.[L]	1xCarbamidomethyl [C2]	1.40141e-07	3.46687e-05	1	1	1	2	P12970 [198-217]	P12970 1xCarbamidomethyl [C199]	1	2141.05	High	n/a	High		7.935e-06		8.146e-09	2.47
P12970	60S ribosomal protein L7a OS=Mus musculus OX=10090 GN=Rpl7a PE=1 SV=2	[K].TCTTVAFTQVNSEDK.[G]	1xCarbamidomethyl [C2]	7.19351e-08	3.46687e-05	1	1	1	13	P12970 [198-212]	P12970 1xCarbamidomethyl [C199]	0	1700.78	High	n/a	High		7.935e-06		4.022e-09	3.05
P12970	60S ribosomal protein L7a OS=Mus musculus OX=10090 GN=Rpl7a PE=1 SV=2	[K].AQLVVIAHDVDPIELVVFLPALCR.[K]	1xCarbamidomethyl [C23]	5.97053e-07	3.46687e-05	1	1	1	1	P12970 [152-175]	P12970 1xCarbamidomethyl [C174]	0	2687.5	High	n/a	High		7.935e-06		3.728e-08	2.96
P12970	60S ribosomal protein L7a OS=Mus musculus OX=10090 GN=Rpl7a PE=1 SV=2	[R].KTCTTVAFTQVNSEDK.[G]	1xCarbamidomethyl [C3]	1.38794e-09	3.46687e-05	1	1	1	10	P12970 [197-212]	P12970 1xCarbamidomethyl [C199]	1	1828.87	High	n/a	High		7.935e-06		6.205e-11	3.16
P12970	60S ribosomal protein L7a OS=Mus musculus OX=10090 GN=Rpl7a PE=1 SV=2	[R].KTCTTVAFTQVNSEDKGALAK.[L]	1xCarbamidomethyl [C3]	6.40825e-08	3.46687e-05	1	1	1	2	P12970 [197-217]	P12970 1xCarbamidomethyl [C199]	2	2269.15	High	n/a	High		7.935e-06		3.564e-09	3.79
P12970	60S ribosomal protein L7a OS=Mus musculus OX=10090 GN=Rpl7a PE=1 SV=2	[K].MGVPYCIIKGK.[A]	1xCarbamidomethyl [C6]	0.000181529	3.46687e-05	1	1	1	6	P12970 [177-187]	P12970 1xCarbamidomethyl [C182]	1	1265.67	High	n/a	High		7.935e-06		1.554e-05	1.87
P12970	60S ribosomal protein L7a OS=Mus musculus OX=10090 GN=Rpl7a PE=1 SV=2	[K].MGVPYCIIK.[G]	1xCarbamidomethyl [C6]	0.00135183	0.000136771	1	1	1	6	P12970 [177-185]	P12970 1xCarbamidomethyl [C182]	0	1080.56	High	n/a	High		2.796e-05		0.0001267	1.58
P12970	60S ribosomal protein L7a OS=Mus musculus OX=10090 GN=Rpl7a PE=1 SV=2	[K].MGVPYCIIKGK.[A]	1xCarbamidomethyl [C6]; 1xOxidation [M1]	4.41598e-05	3.46687e-05	1	1	1	3	P12970 [177-187]	P12970 1xCarbamidomethyl [C182]	1	1281.67	High	n/a	High		7.935e-06		3.492e-06	1.16
P12970	60S ribosomal protein L7a OS=Mus musculus OX=10090 GN=Rpl7a PE=1 SV=2	[K].MGVPYCIIK.[G]	1xCarbamidomethyl [C6]; 1xOxidation [M1]	0.000613352	3.46687e-05	1	1	1	6	P12970 [177-185]	P12970 1xCarbamidomethyl [C182]	0	1096.55	High	n/a	High		7.935e-06		5.565e-05	1.81
P12970	60S ribosomal protein L7a OS=Mus musculus OX=10090 GN=Rpl7a PE=1 SV=2	[R].KMGVPYCIIK.[G]	1xCarbamidomethyl [C7]	2.63671e-05	3.46687e-05	1	1	1	3	P12970 [176-185]	P12970 1xCarbamidomethyl [C182]	1	1208.65	High	n/a	High		7.935e-06		2.041e-06	2.72
P12970	60S ribosomal protein L7a OS=Mus musculus OX=10090 GN=Rpl7a PE=1 SV=2	[R].KMGVPYCIIK.[G]	1xCarbamidomethyl [C7]; 1xOxidation [M2]	0.00391775	0.000259952	1	1	1	1	P12970 [176-185]	P12970 1xCarbamidomethyl [C182]	1	1224.65	High	n/a	High		5.247e-05		0.000373	1.02
P62918	60S ribosomal protein L8 OS=Mus musculus OX=10090 GN=Rpl8 PE=1 SV=2	[R].TELFIAAEGIHTGQFVYCGKK.[A]	1xCarbamidomethyl [C18]	5.27169e-07	3.46687e-05	1	1	1	7	P62918 [73-93]	P62918 1xCarbamidomethyl [C90]	1	2369.2	High	n/a	High		7.935e-06		3.295e-08	4.66
P62918	60S ribosomal protein L8 OS=Mus musculus OX=10090 GN=Rpl8 PE=1 SV=2	[R].TELFIAAEGIHTGQFVYCGK.[K]	1xCarbamidomethyl [C18]	3.50064e-08	3.46687e-05	1	1	1	8	P62918 [73-92]	P62918 1xCarbamidomethyl [C90]	0	2241.1	High	n/a	High		7.935e-06		1.875e-09	4.51
P62918	60S ribosomal protein L8 OS=Mus musculus OX=10090 GN=Rpl8 PE=1 SV=2	[K].RTELFIAAEGIHTGQFVYCGKK.[A]	1xCarbamidomethyl [C19]	0.000150616	3.46687e-05	1	1	1	1	P62918 [72-93]	P62918 1xCarbamidomethyl [C90]	2	2525.3	High	n/a	High		7.935e-06		1.282e-05	3.09
P62918	60S ribosomal protein L8 OS=Mus musculus OX=10090 GN=Rpl8 PE=1 SV=2	[K].AKRNCWPR.[V]	1xCarbamidomethyl [C5]	0.00305704	0.000202726	1	1	1	7	P62918 [191-198]	P62918 1xCarbamidomethyl [C195]	2	1087.56	High	n/a	High		4.09e-05		0.0002896	1.92
P62918	60S ribosomal protein L8 OS=Mus musculus OX=10090 GN=Rpl8 PE=1 SV=2	[K].AQLNIGNVLPVGTMPEGTIVCCLEEKPGDR.[G]	2xCarbamidomethyl [C21; C22]	2.80074e-10	3.46687e-05	1	1	1	6	P62918 [94-123]	P62918 2xCarbamidomethyl [C114; C115]	0	3267.62	High	n/a	High		7.935e-06		1.155e-11	7.96
P62918	60S ribosomal protein L8 OS=Mus musculus OX=10090 GN=Rpl8 PE=1 SV=2	[K].AQLNIGNVLPVGTMPEGTIVCCLEEKPGDR.[G]	2xCarbamidomethyl [C21; C22]; 1xOxidation [M14]	9.05754e-10	3.46687e-05	1	1	1	5	P62918 [94-123]	P62918 2xCarbamidomethyl [C114; C115]	0	3283.61	High	n/a	High		7.935e-06		3.982e-11	7.08
P51410	60S ribosomal protein L9 OS=Mus musculus OX=10090 GN=Rpl9 PE=2 SV=2	[R].TICSHVQNMIK.[G]	1xCarbamidomethyl [C3]	2.32637e-07	3.46687e-05	1	1	1	51	P51410 [72-82]	P51410 1xCarbamidomethyl [C74]	0	1330.66	High	n/a	High		7.935e-06		1.39e-08	4.03
P51410	60S ribosomal protein L9 OS=Mus musculus OX=10090 GN=Rpl9 PE=2 SV=2	[R].TICSHVQNMIKGVTLGFR.[Y]	1xCarbamidomethyl [C3]; 1xOxidation [M9]	0.000369621	3.46687e-05	1	1	1	2	P51410 [72-89]	P51410 1xCarbamidomethyl [C74]	1	2077.07	High	n/a	High		7.935e-06		3.268e-05	2.96
P51410	60S ribosomal protein L9 OS=Mus musculus OX=10090 GN=Rpl9 PE=2 SV=2	[R].TICSHVQNMIK.[G]	1xCarbamidomethyl [C3]; 1xOxidation [M9]	1.68911e-07	3.46687e-05	1	1	1	39	P51410 [72-82]	P51410 1xCarbamidomethyl [C74]	0	1346.66	High	n/a	High		7.935e-06		9.871e-09	2.93
P51410	60S ribosomal protein L9 OS=Mus musculus OX=10090 GN=Rpl9 PE=2 SV=2	[R].TGVACSVSQAQK.[D]	1xCarbamidomethyl [C5]	3.17689e-06	3.46687e-05	1	1	1	22	P51410 [130-141]	P51410 1xCarbamidomethyl [C134]	0	1235.6	High	n/a	High		7.935e-06		2.185e-07	2.61
P51410	60S ribosomal protein L9 OS=Mus musculus OX=10090 GN=Rpl9 PE=2 SV=2	[R].TGVACSVSQAQKDELILEGNDIELVSNSAALIQQATTVK.[N]	1xCarbamidomethyl [C5]	0.242073	0.00897607	1	1	1	1	P51410 [130-168]	P51410 1xCarbamidomethyl [C134]	1	4101.1	High	n/a	High		0.000412		0.04752	2.38
P51410	60S ribosomal protein L9 OS=Mus musculus OX=10090 GN=Rpl9 PE=2 SV=2	[K].ELATVRTICSHVQNMIK.[G]	1xCarbamidomethyl [C9]	5.13293e-07	3.46687e-05	1	1	1	5	P51410 [66-82]	P51410 1xCarbamidomethyl [C74]	1	2000.04	High	n/a	High		7.935e-06		3.177e-08	4.92
P51410	60S ribosomal protein L9 OS=Mus musculus OX=10090 GN=Rpl9 PE=2 SV=2	[K].ELATVRTICSHVQNMIK.[G]	1xCarbamidomethyl [C9]; 1xOxidation [M15]	2.58931e-06	3.46687e-05	1	1	1	5	P51410 [66-82]	P51410 1xCarbamidomethyl [C74]	1	2016.04	High	n/a	High		7.935e-06		1.756e-07	5.03
Q9CXK8	60S ribosome subunit biogenesis protein NIP7 homolog OS=Mus musculus OX=10090 GN=Nip7 PE=1 SV=1	[K].LVSLGTCFGK.[F]	1xCarbamidomethyl [C7]	0.000356713	3.46687e-05	1	1	1	2	Q9CXK8 [63-72]	Q9CXK8 1xCarbamidomethyl [C69]	0	1081.57	High	n/a	High		7.935e-06		3.154e-05	1.69
Q9DCD0	6-phosphogluconate dehydrogenase, decarboxylating OS=Mus musculus OX=10090 GN=Pgd PE=1 SV=3	[R].CRDLKAK.[G]	1xCarbamidomethyl [C1]	0.123951	0.00412416	1	1	1	1	Q9DCD0 [113-119]	Q9DCD0 1xCarbamidomethyl [C113]	2	890.488	High	n/a	High		0.001033		0.01933	0.66
Q9DCD0	6-phosphogluconate dehydrogenase, decarboxylating OS=Mus musculus OX=10090 GN=Pgd PE=1 SV=3	[K].SAVDNCQDSWRR.[V]	1xCarbamidomethyl [C6]	0.000135375	3.46687e-05	1	1	1	2	Q9DCD0 [397-408]	Q9DCD0 1xCarbamidomethyl [C402]	1	1493.65	High	n/a	High		7.935e-06		1.147e-05	2.71
Q9DCD0	6-phosphogluconate dehydrogenase, decarboxylating OS=Mus musculus OX=10090 GN=Pgd PE=1 SV=3	[K].SAVDNCQDSWR.[R]	1xCarbamidomethyl [C6]	0.000121677	3.46687e-05	1	1	1	2	Q9DCD0 [397-407]	Q9DCD0 1xCarbamidomethyl [C402]	0	1337.55	High	n/a	High		7.935e-06		1.024e-05	3.08
Q9DCD0	6-phosphogluconate dehydrogenase, decarboxylating OS=Mus musculus OX=10090 GN=Pgd PE=1 SV=3	[K].VGTGEPCCDWVGDEGAGHFVK.[M]	2xCarbamidomethyl [C7; C8]	1.15328e-05	3.46687e-05	1	1	1	1	Q9DCD0 [164-184]	Q9DCD0 2xCarbamidomethyl [C170; C171]	0	2276.97	High	n/a	High		7.935e-06		8.521e-07	0.47
Q9CQ60	6-phosphogluconolactonase OS=Mus musculus OX=10090 GN=Pgls PE=1 SV=1	[R].AASCLEGDR.[G]	1xCarbamidomethyl [C4]	0.00199741	0.000136771	1	1	1	6	Q9CQ60 [30-38]	Q9CQ60 1xCarbamidomethyl [C33]	0	978.431	High	n/a	High		2.796e-05		0.000189	2.3
Q9CQ60	6-phosphogluconolactonase OS=Mus musculus OX=10090 GN=Pgls PE=1 SV=1	[R].TGALCWFLDEAAAR.[L]	1xCarbamidomethyl [C5]	2.52115e-06	3.46687e-05	1	1	1	5	Q9CQ60 [232-245]	Q9CQ60 1xCarbamidomethyl [C236]	0	1580.75	High	n/a	High		7.935e-06		1.707e-07	3.8
Q9CQ60	6-phosphogluconolactonase OS=Mus musculus OX=10090 GN=Pgls PE=1 SV=1	[R].WTLGFCDER.[L]	1xCarbamidomethyl [C6]	0.000800634	7.02174e-05	1	1	1	3	Q9CQ60 [73-81]	Q9CQ60 1xCarbamidomethyl [C78]	0	1183.52	High	n/a	High		1.496e-05		7.319e-05	3.47
O88455	7-dehydrocholesterol reductase OS=Mus musculus OX=10090 GN=Dhcr7 PE=1 SV=1	[K].GYLFPTSAEDCK.[F]	1xCarbamidomethyl [C11]	9.91755e-05	3.46687e-05	1	1	1	1	O88455 [195-206]	O88455 1xCarbamidomethyl [C205]	0	1387.62	High	n/a	High		7.935e-06		8.209e-06	3.41
O88455	7-dehydrocholesterol reductase OS=Mus musculus OX=10090 GN=Dhcr7 PE=1 SV=1	[K].AIECSYTSADGLK.[H]	1xCarbamidomethyl [C4]	1.45324e-05	3.46687e-05	1	1	1	3	O88455 [373-385]	O88455 1xCarbamidomethyl [C376]	0	1414.65	High	n/a	High		7.935e-06		1.086e-06	3.55
O88455	7-dehydrocholesterol reductase OS=Mus musculus OX=10090 GN=Dhcr7 PE=1 SV=1	[R].TDGRCLIWGK.[K]	1xCarbamidomethyl [C5]	0.0126833	0.000480989	1	1	1	1	O88455 [360-369]	O88455 1xCarbamidomethyl [C364]	1	1205.61	High	n/a	High		0.0001237		0.001259	3.48
Q3UFY7	7-methylguanosine phosphate-specific 5'-nucleotidase OS=Mus musculus OX=10090 GN=Nt5c3b PE=1 SV=3	[K].IISEDCR.[K]	1xCarbamidomethyl [C6]	0.0134883	0.000480989	1	4	1	1	Q3UFY7 [68-74]	Q3UFY7 1xCarbamidomethyl [C73]	0	892.419	High	n/a	High		0.0001237		0.001346	1.17
P97819	85/88 kDa calcium-independent phospholipase A2 OS=Mus musculus OX=10090 GN=Pla2g6 PE=1 SV=3	[K].GCAEMIISMDSNQIHSK.[D]	1xCarbamidomethyl [C2]	6.08186e-05	3.46687e-05	1	2	1	1	P97819 [266-282]	P97819 1xCarbamidomethyl [C267]	0	1920.86	High	n/a	High		7.935e-06		4.892e-06	1.79
P97819	85/88 kDa calcium-independent phospholipase A2 OS=Mus musculus OX=10090 GN=Pla2g6 PE=1 SV=3	[R].ECFHHSR.[I]	1xCarbamidomethyl [C2]	0.250149	0.00937161	1	2	1	1	P97819 [133-139]	P97819 1xCarbamidomethyl [C134]	0	972.41	High	n/a	High		0.002266		0.05607	0.71
P97819	85/88 kDa calcium-independent phospholipase A2 OS=Mus musculus OX=10090 GN=Pla2g6 PE=1 SV=3	[R].TWDCVLVSPR.[N]	1xCarbamidomethyl [C4]	0.00045344	3.46687e-05	1	2	1	4	P97819 [54-63]	P97819 1xCarbamidomethyl [C57]	0	1232.61	High	n/a	High		7.935e-06		4.074e-05	1.62
P97819	85/88 kDa calcium-independent phospholipase A2 OS=Mus musculus OX=10090 GN=Pla2g6 PE=1 SV=3	[R].VLLLCNAR.[C]	1xCarbamidomethyl [C5]	0.0228056	0.000779279	1	2	1	4	P97819 [238-245]	P97819 1xCarbamidomethyl [C242]	0	958.55	High	n/a	High		0.0002193		0.002373	2.3
P97819	85/88 kDa calcium-independent phospholipase A2 OS=Mus musculus OX=10090 GN=Pla2g6 PE=1 SV=3	[K].SPQVPVTCVDVFRPSNPWELAK.[T]	1xCarbamidomethyl [C8]	8.15024e-07	3.46687e-05	1	2	1	1	P97819 [699-720]	P97819 1xCarbamidomethyl [C706]	0	2526.28	High	n/a	High		7.935e-06		5.219e-08	4.48
P97819	85/88 kDa calcium-independent phospholipase A2 OS=Mus musculus OX=10090 GN=Pla2g6 PE=1 SV=3	[R].IISCANSTENEEGCTPLHLACR.[K]	3xCarbamidomethyl [C4; C14; C21]	0.261747	0.00983706	1	2	1	1	P97819 [140-161]	P97819 3xCarbamidomethyl [C143; C153; C160]	0	2532.13	High	n/a	High		0.00238		0.06008	1.49
Q3U2V3	8-oxo-dGDP phosphatase NUDT18 OS=Mus musculus OX=10090 GN=Nudt18 PE=1 SV=1	[R].LLQECLTLHSLAVETK.[G]	1xCarbamidomethyl [C5]	2.49973e-05	3.46687e-05	1	3	1	2	Q3U2V3 [237-252]	Q3U2V3 1xCarbamidomethyl [C241]	0	1855	High	n/a	High		7.935e-06		1.933e-06	2.16
Q3U2V3	8-oxo-dGDP phosphatase NUDT18 OS=Mus musculus OX=10090 GN=Nudt18 PE=1 SV=1	[K].EEAGLLCEPVTLLSVEER.[G]	1xCarbamidomethyl [C7]	1.21556e-07	3.46687e-05	1	2	1	1	Q3U2V3 [94-111]	Q3U2V3 1xCarbamidomethyl [C100]	0	2044.03	High	n/a	High		7.935e-06		6.949e-09	3.33
Q3U2V3	8-oxo-dGDP phosphatase NUDT18 OS=Mus musculus OX=10090 GN=Nudt18 PE=1 SV=1	[K].FCQQAMHPLILPQELPCSVVCQR.[L]	3xCarbamidomethyl [C2; C17; C21]	9.14546e-08	3.46687e-05	1	2	1	1	Q3U2V3 [169-191]	Q3U2V3 3xCarbamidomethyl [C170; C185; C189]	0	2811.36	High	n/a	High		7.935e-06		5.181e-09	5.84
Q8BNJ2	A disintegrin and metalloproteinase with thrombospondin motifs 4 OS=Mus musculus OX=10090 GN=Adamts4 PE=2 SV=2	[R].DCTRPVPR.[N]	1xCarbamidomethyl [C2]	0.0979638	0.0032786	1	1	1	2	Q8BNJ2 [542-549]	Q8BNJ2 1xCarbamidomethyl [C543]	0	1000.5	High	n/a	High		0.000843		0.01382	2.11
Q9D0L4	AarF domain-containing protein kinase 1 OS=Mus musculus OX=10090 GN=Adck1 PE=1 SV=1	[K].NQIDVNEISCHLGK.[M]	1xCarbamidomethyl [C10]	2.07162e-08	3.46687e-05	1	2	1	3	Q9D0L4 [280-293]	Q9D0L4 1xCarbamidomethyl [C289]	0	1626.79	High	n/a	High		7.935e-06		1.076e-09	3.99
Q9D0L4	AarF domain-containing protein kinase 1 OS=Mus musculus OX=10090 GN=Adck1 PE=1 SV=1	[R].LGAADLYPLFACMLTAR.[S]	1xCarbamidomethyl [C12]	3.89631e-07	3.46687e-05	1	2	1	1	Q9D0L4 [368-384]	Q9D0L4 1xCarbamidomethyl [C379]	0	1882.96	High	n/a	High		7.935e-06		2.384e-08	4.95
Q9D0L4	AarF domain-containing protein kinase 1 OS=Mus musculus OX=10090 GN=Adck1 PE=1 SV=1	[R].LGAADLYPLFACMLTAR.[S]	1xCarbamidomethyl [C12]; 1xOxidation [M13]	3.89631e-07	3.46687e-05	1	2	1	3	Q9D0L4 [368-384]	Q9D0L4 1xCarbamidomethyl [C379]	0	1898.95	High	n/a	High		7.935e-06		2.392e-08	2.87
Q9D0L4	AarF domain-containing protein kinase 1 OS=Mus musculus OX=10090 GN=Adck1 PE=1 SV=1	[R].NNAACYLPEISQLLNHVPR.[Q]	1xCarbamidomethyl [C5]	5.26562e-10	3.46687e-05	1	2	1	4	Q9D0L4 [408-426]	Q9D0L4 1xCarbamidomethyl [C412]	0	2209.12	High	n/a	High		7.935e-06		2.23e-11	5.13
Q9D0L4	AarF domain-containing protein kinase 1 OS=Mus musculus OX=10090 GN=Adck1 PE=1 SV=1	[R].SSASSFLNMSRCCIR.[A]	2xCarbamidomethyl [C12; C13]	0.115598	0.00388333	1	2	1	1	Q9D0L4 [449-463]	Q9D0L4 2xCarbamidomethyl [C460; C461]	1	1775.8	High	n/a	High		0.0009633		0.01742	1.91
Q9D0L4	AarF domain-containing protein kinase 1 OS=Mus musculus OX=10090 GN=Adck1 PE=1 SV=1	[R].LFELCCANR.[G]	2xCarbamidomethyl [C5; C6]	0.00626228	0.000314522	1	1	1	4	Q9D0L4 [82-90]	Q9D0L4 2xCarbamidomethyl [C86; C87]	0	1182.54	High	n/a	High		7.473e-05		0.000602	2.51
Q9D0L4	AarF domain-containing protein kinase 1 OS=Mus musculus OX=10090 GN=Adck1 PE=1 SV=1	[R].RLFELCCANR.[G]	2xCarbamidomethyl [C6; C7]	0.000100061	3.46687e-05	1	1	1	2	Q9D0L4 [81-90]	Q9D0L4 2xCarbamidomethyl [C86; C87]	1	1338.64	High	n/a	High		7.935e-06		8.326e-06	2.76
Q9D0L4	AarF domain-containing protein kinase 1 OS=Mus musculus OX=10090 GN=Adck1 PE=1 SV=1	[R].RLFELCCANRGTFIK.[V]	2xCarbamidomethyl [C6; C7]	0.000836987	7.02174e-05	1	1	1	1	Q9D0L4 [81-95]	Q9D0L4 2xCarbamidomethyl [C86; C87]	2	1884.96	High	n/a	High		1.496e-05		7.669e-05	2.43
Q8CBW3	Abl interactor 1 OS=Mus musculus OX=10090 GN=Abi1 PE=1 SV=3	[K].NDDGWFEGVCNR.[V]	1xCarbamidomethyl [C10]	3.38208e-05	3.46687e-05	1	5	1	3	Q8CBW3 [452-463]	Q8CBW3 1xCarbamidomethyl [C461]	0	1468.59	High	n/a	High		7.935e-06		2.655e-06	3.74
Q8CBW3	Abl interactor 1 OS=Mus musculus OX=10090 GN=Abi1 PE=1 SV=3	[K].KNDDGWFEGVCNR.[V]	1xCarbamidomethyl [C11]	1.4782e-07	3.46687e-05	1	5	1	1	Q8CBW3 [451-463]	Q8CBW3 1xCarbamidomethyl [C461]	1	1596.69	High	n/a	High		7.935e-06		8.541e-09	3.06
Q8CBW3	Abl interactor 1 OS=Mus musculus OX=10090 GN=Abi1 PE=1 SV=3	[R].VADYCENNYIQATDK.[R]	1xCarbamidomethyl [C5]	6.02386e-07	3.46687e-05	1	5	1	3	Q8CBW3 [29-43]	Q8CBW3 1xCarbamidomethyl [C33]	0	1803.79	High	n/a	High		7.935e-06		3.773e-08	3.12
P62484	Abl interactor 2 OS=Mus musculus OX=10090 GN=Abi2 PE=1 SV=1	[R].VADYCENNYIQSPDK.[Q]	1xCarbamidomethyl [C5]	0.178657	0.00622549	1	1	1	1	P62484 [29-43]	P62484 1xCarbamidomethyl [C33]	0	1815.79	High	n/a	High		0.001547		0.0332	0.61
Q9D2R0	Acetoacetyl-CoA synthetase OS=Mus musculus OX=10090 GN=Aacs PE=1 SV=1	[K].FPGVWAHGDYCRINPK.[T]	1xCarbamidomethyl [C11]	4.37543e-06	3.46687e-05	1	1	1	1	Q9D2R0 [515-530]	Q9D2R0 1xCarbamidomethyl [C525]	1	1916.92	High	n/a	High		7.935e-06		3.068e-07	3.48
P21836	Acetylcholinesterase OS=Mus musculus OX=10090 GN=Ache PE=1 SV=1	[R].DAMSAVVGDHNVVCPVAQLAGR.[L]	1xCarbamidomethyl [C14]	3.68256e-15	3.46687e-05	1	1	1	2	P21836 [427-448]	P21836 1xCarbamidomethyl [C440]	0	2266.11	High	n/a	High		7.935e-06		8.117e-17	6.4
P21836	Acetylcholinesterase OS=Mus musculus OX=10090 GN=Ache PE=1 SV=1	[R].DAMSAVVGDHNVVCPVAQLAGR.[L]	1xCarbamidomethyl [C14]; 1xOxidation [M3]	0.00017833	3.46687e-05	1	1	1	1	P21836 [427-448]	P21836 1xCarbamidomethyl [C440]	0	2282.1	High	n/a	High		7.935e-06		1.531e-05	3.54
P21836	Acetylcholinesterase OS=Mus musculus OX=10090 GN=Ache PE=1 SV=1	[R].AQTCAFWNR.[F]	1xCarbamidomethyl [C4]	0.0209018	0.000779279	1	1	1	2	P21836 [557-565]	P21836 1xCarbamidomethyl [C560]	0	1153.52	High	n/a	High		0.0002153		0.002154	3
Q8CAY6	Acetyl-CoA acetyltransferase, cytosolic OS=Mus musculus OX=10090 GN=Acat2 PE=1 SV=2	[K].VNIDGGAIALGHPLGASGCR.[I]	1xCarbamidomethyl [C19]	1.9823e-07	3.46687e-05	1	1	1	5	Q8CAY6 [342-361]	Q8CAY6 1xCarbamidomethyl [C360]	0	1934.99	High	n/a	High		7.935e-06		1.165e-08	4.83
Q8CAY6	Acetyl-CoA acetyltransferase, cytosolic OS=Mus musculus OX=10090 GN=Acat2 PE=1 SV=2	[K].VAPEEVSEVIFGHVLTAGCGQNPTR.[Q]	1xCarbamidomethyl [C19]	6.81455e-10	3.46687e-05	1	1	1	5	Q8CAY6 [47-71]	Q8CAY6 1xCarbamidomethyl [C65]	0	2667.32	High	n/a	High		7.935e-06		2.93e-11	6.63
Q8QZT1	Acetyl-CoA acetyltransferase, mitochondrial OS=Mus musculus OX=10090 GN=Acat1 PE=1 SV=1	[R].QATLGAGLPISTPCTTVNK.[V]	1xCarbamidomethyl [C14]	5.70871e-08	3.46687e-05	1	1	1	16	Q8QZT1 [103-121]	Q8QZT1 1xCarbamidomethyl [C116]	0	1929.01	High	n/a	High		7.935e-06		3.154e-09	3.92
Q8QZT1	Acetyl-CoA acetyltransferase, mitochondrial OS=Mus musculus OX=10090 GN=Acat1 PE=1 SV=1	[K].DGLTDVYNKIHMGNCAENTAK.[K]	1xCarbamidomethyl [C15]	2.49883e-06	3.46687e-05	1	1	1	1	Q8QZT1 [179-199]	Q8QZT1 1xCarbamidomethyl [C193]	1	2351.08	High	n/a	High		7.935e-06		1.688e-07	2.64
Q8QZT1	Acetyl-CoA acetyltransferase, mitochondrial OS=Mus musculus OX=10090 GN=Acat1 PE=1 SV=1	[K].VCASGMK.[A]	1xCarbamidomethyl [C2]	0.00838202	0.000366757	1	1	1	16	Q8QZT1 [122-128]	Q8QZT1 1xCarbamidomethyl [C123]	0	752.343	High	n/a	High		8.513e-05		0.0008153	1.54
Q8QZT1	Acetyl-CoA acetyltransferase, mitochondrial OS=Mus musculus OX=10090 GN=Acat1 PE=1 SV=1	[K].VCASGMK.[A]	1xCarbamidomethyl [C2]; 1xOxidation [M6]	0.00131631	0.000106916	1	1	1	20	Q8QZT1 [122-128]	Q8QZT1 1xCarbamidomethyl [C123]	0	768.338	High	Low	High	0.6551	2.232e-05	0.8601	0.0001227	0.89	19
Q8QZT1	Acetyl-CoA acetyltransferase, mitochondrial OS=Mus musculus OX=10090 GN=Acat1 PE=1 SV=1	[R].IVVHMAHALKPGEFGLASICNGGGGASALLIEK.[L]	1xCarbamidomethyl [C20]	0.00488834	0.000259952	1	1	1	1	Q8QZT1 [391-423]	Q8QZT1 1xCarbamidomethyl [C410]	0	3317.75	High	n/a	High		0.0002131		0.003895	3.4
Q8QZT1	Acetyl-CoA acetyltransferase, mitochondrial OS=Mus musculus OX=10090 GN=Acat1 PE=1 SV=1	[R].IVVHMAHALKPGEFGLASICNGGGGASALLIEK.[L]	1xCarbamidomethyl [C20]; 1xOxidation [M5]	3.29191e-06	3.46687e-05	1	1	1	1	Q8QZT1 [391-423]	Q8QZT1 1xCarbamidomethyl [C410]	0	3333.74	High	n/a	High		0.0002131		4.697e-05	5.6
Q8QZT1	Acetyl-CoA acetyltransferase, mitochondrial OS=Mus musculus OX=10090 GN=Acat1 PE=1 SV=1	[K].IHMGNCAENTAK.[K]	1xCarbamidomethyl [C6]	4.82318e-07	3.46687e-05	1	1	1	36	Q8QZT1 [188-199]	Q8QZT1 1xCarbamidomethyl [C193]	0	1345.6	High	n/a	High		7.935e-06		2.974e-08	3.7
Q8QZT1	Acetyl-CoA acetyltransferase, mitochondrial OS=Mus musculus OX=10090 GN=Acat1 PE=1 SV=1	[K].IHMGNCAENTAKK.[M]	1xCarbamidomethyl [C6]	0.148731	0.00479437	1	1	1	1	Q8QZT1 [188-200]	Q8QZT1 1xCarbamidomethyl [C193]	1	1473.69	High	n/a	High		0.001207		0.02497	1.71
Q8QZT1	Acetyl-CoA acetyltransferase, mitochondrial OS=Mus musculus OX=10090 GN=Acat1 PE=1 SV=1	[K].IHMGNCAENTAK.[K]	1xCarbamidomethyl [C6]; 1xOxidation [M3]	4.10983e-07	3.46687e-05	1	1	1	35	Q8QZT1 [188-199]	Q8QZT1 1xCarbamidomethyl [C193]	0	1361.59	High	n/a	High		7.935e-06		2.524e-08	2.57
Q8QZT1	Acetyl-CoA acetyltransferase, mitochondrial OS=Mus musculus OX=10090 GN=Acat1 PE=1 SV=1	[R].QATLGAGLPISTPCTTVNKVCASGMK.[A]	2xCarbamidomethyl [C14; C21]	2.30223e-11	3.46687e-05	1	1	1	5	Q8QZT1 [103-128]	Q8QZT1 2xCarbamidomethyl [C116; C123]	1	2662.34	High	n/a	High		7.935e-06		8.203e-13	5.09
Q8QZT1	Acetyl-CoA acetyltransferase, mitochondrial OS=Mus musculus OX=10090 GN=Acat1 PE=1 SV=1	[R].QATLGAGLPISTPCTTVNKVCASGMK.[A]	2xCarbamidomethyl [C14; C21]; 1xOxidation [M25]	6.07299e-09	3.46687e-05	1	1	1	4	Q8QZT1 [103-128]	Q8QZT1 2xCarbamidomethyl [C116; C123]	1	2678.33	High	n/a	High		7.935e-06		2.943e-10	4.36
Q5SWU9	Acetyl-CoA carboxylase 1 OS=Mus musculus OX=10090 GN=Acaca PE=1 SV=1	[K].RPGAALDPGCVIAK.[M]	1xCarbamidomethyl [C10]	0.00013299	3.46687e-05	1	2	1	3	Q5SWU9 [803-816]	Q5SWU9 1xCarbamidomethyl [C812]	0	1424.77	High	n/a	High		7.935e-06		1.119e-05	3.93
Q5SWU9	Acetyl-CoA carboxylase 1 OS=Mus musculus OX=10090 GN=Acaca PE=1 SV=1	[K].NLLVTMLIDQLCGR.[D]	1xCarbamidomethyl [C12]; 1xOxidation [M6]	7.45683e-07	3.46687e-05	1	2	1	2	Q5SWU9 [1037-1050]	Q5SWU9 1xCarbamidomethyl [C1048]	0	1661.87	High	n/a	High		7.935e-06		4.713e-08	3.39
Q5SWU9	Acetyl-CoA carboxylase 1 OS=Mus musculus OX=10090 GN=Acaca PE=1 SV=1	[K].VQAERPDTMLGVVCGALHVADVSLR.[N]	1xCarbamidomethyl [C14]	1.18175e-11	3.46687e-05	1	2	1	2	Q5SWU9 [620-644]	Q5SWU9 1xCarbamidomethyl [C633]	0	2693.39	High	n/a	High		7.935e-06		4.059e-13	7.29
Q5SWU9	Acetyl-CoA carboxylase 1 OS=Mus musculus OX=10090 GN=Acaca PE=1 SV=1	[K].VQAERPDTMLGVVCGALHVADVSLR.[N]	1xCarbamidomethyl [C14]; 1xOxidation [M9]	3.28561e-11	3.46687e-05	1	2	1	5	Q5SWU9 [620-644]	Q5SWU9 1xCarbamidomethyl [C633]	0	2709.38	High	n/a	High		7.935e-06		1.195e-12	6.88
Q5SWU9	Acetyl-CoA carboxylase 1 OS=Mus musculus OX=10090 GN=Acaca PE=1 SV=1	[R].ECSQPVMVYIPPQAELR.[G]	1xCarbamidomethyl [C2]	2.43306e-06	3.46687e-05	1	2	1	1	Q5SWU9 [2072-2088]	Q5SWU9 1xCarbamidomethyl [C2073]	0	2016.99	High	n/a	High		7.935e-06		1.653e-07	2.33
Q5SWU9	Acetyl-CoA carboxylase 1 OS=Mus musculus OX=10090 GN=Acaca PE=1 SV=1	[K].IIEEAPAAIATPAVFEHMEQCAVK.[L]	1xCarbamidomethyl [C21]	1.92938e-08	3.46687e-05	1	2	1	1	Q5SWU9 [386-409]	Q5SWU9 1xCarbamidomethyl [C406]	0	2625.31	High	n/a	High		7.935e-06		1.001e-09	4.18
Q5SWU9	Acetyl-CoA carboxylase 1 OS=Mus musculus OX=10090 GN=Acaca PE=1 SV=1	[R].TDCNHIFLNFVPTVIMDPSK.[I]	1xCarbamidomethyl [C3]	3.34841e-08	3.46687e-05	1	2	1	2	Q5SWU9 [1467-1486]	Q5SWU9 1xCarbamidomethyl [C1469]	0	2348.14	High	n/a	High		7.935e-06		1.792e-09	5
Q5SWU9	Acetyl-CoA carboxylase 1 OS=Mus musculus OX=10090 GN=Acaca PE=1 SV=1	[K].QVNCEVDQR.[F]	1xCarbamidomethyl [C4]	0.000556249	3.46687e-05	1	2	1	2	Q5SWU9 [1338-1346]	Q5SWU9 1xCarbamidomethyl [C1341]	0	1147.52	High	n/a	High		7.935e-06		5.009e-05	2.66
Q5SWU9	Acetyl-CoA carboxylase 1 OS=Mus musculus OX=10090 GN=Acaca PE=1 SV=1	[K].DNTCVVEFQFMLPTSHPNR.[G]	1xCarbamidomethyl [C4]	2.10798e-09	3.46687e-05	1	2	1	2	Q5SWU9 [1172-1190]	Q5SWU9 1xCarbamidomethyl [C1175]	0	2292.05	High	n/a	High		7.935e-06		9.683e-11	4.48
Q5SWU9	Acetyl-CoA carboxylase 1 OS=Mus musculus OX=10090 GN=Acaca PE=1 SV=1	[K].DNTCVVEFQFMLPTSHPNR.[G]	1xCarbamidomethyl [C4]; 1xOxidation [M11]	0.000707023	3.46687e-05	1	2	1	1	Q5SWU9 [1172-1190]	Q5SWU9 1xCarbamidomethyl [C1175]	0	2308.05	High	n/a	High		7.935e-06		6.43e-05	2.11
Q5SWU9	Acetyl-CoA carboxylase 1 OS=Mus musculus OX=10090 GN=Acaca PE=1 SV=1	[R].NFDLTAIPCANHK.[M]	1xCarbamidomethyl [C9]	1.49253e-05	3.46687e-05	1	2	1	2	Q5SWU9 [1387-1399]	Q5SWU9 1xCarbamidomethyl [C1395]	0	1500.73	High	n/a	High		7.935e-06		1.117e-06	3.72
Q5SWU9	Acetyl-CoA carboxylase 1 OS=Mus musculus OX=10090 GN=Acaca PE=1 SV=1	[R].VSALNSVHCEHVEDEGESR.[Y]	1xCarbamidomethyl [C9]	5.17082e-11	3.46687e-05	1	2	1	1	Q5SWU9 [1760-1778]	Q5SWU9 1xCarbamidomethyl [C1768]	0	2153.95	High	n/a	High		7.935e-06		1.926e-12	4.19
Q99NB1	Acetyl-coenzyme A synthetase 2-like, mitochondrial OS=Mus musculus OX=10090 GN=Acss1 PE=1 SV=1	[R].VAIYMPVSPLAVAAMLACAR.[I]	1xCarbamidomethyl [C18]; 1xOxidation [M]	2.01709e-08	3.46687e-05	1	1	2	3	Q99NB1 [161-180]	Q99NB1 1xCarbamidomethyl [C178]	0	2120.11	High	n/a	High		7.935e-06		1.048e-09	4.49
Q99NB1	Acetyl-coenzyme A synthetase 2-like, mitochondrial OS=Mus musculus OX=10090 GN=Acss1 PE=1 SV=1	[R].VAIYMPVSPLAVAAMLACAR.[I]	1xCarbamidomethyl [C18]; 2xOxidation [M5; M15]	4.95545e-06	3.46687e-05	1	1	1	2	Q99NB1 [161-180]	Q99NB1 1xCarbamidomethyl [C178]	0	2136.1	High	n/a	High		7.935e-06		3.498e-07	2.05
Q99NB1	Acetyl-coenzyme A synthetase 2-like, mitochondrial OS=Mus musculus OX=10090 GN=Acss1 PE=1 SV=1	[K].SCPTVQHVLVAHR.[T]	1xCarbamidomethyl [C2]	2.61144e-07	3.46687e-05	1	1	1	11	Q99NB1 [234-246]	Q99NB1 1xCarbamidomethyl [C235]	0	1503.78	High	n/a	High		7.935e-06		1.568e-08	2.88
Q99NB1	Acetyl-coenzyme A synthetase 2-like, mitochondrial OS=Mus musculus OX=10090 GN=Acss1 PE=1 SV=1	[R].ELLETTCR.[L]	1xCarbamidomethyl [C7]	0.0151197	0.000564831	1	1	1	2	Q99NB1 [138-145]	Q99NB1 1xCarbamidomethyl [C144]	0	1021.5	High	n/a	High		0.0001575		0.001521	2.2
Q99NB1	Acetyl-coenzyme A synthetase 2-like, mitochondrial OS=Mus musculus OX=10090 GN=Acss1 PE=1 SV=1	[K].IVDEAVKSCPTVQHVLVAHR.[T]	1xCarbamidomethyl [C9]	0.0207202	0.000779279	1	1	1	1	Q99NB1 [227-246]	Q99NB1 1xCarbamidomethyl [C235]	1	2258.21	High	n/a	High		0.0002099		0.002132	1.45
Q9QXG4	Acetyl-coenzyme A synthetase, cytoplasmic OS=Mus musculus OX=10090 GN=Acss2 PE=1 SV=2	[K].GATTNICYNVLDR.[N]	1xCarbamidomethyl [C7]	2.13003e-05	3.46687e-05	1	1	1	1	Q9QXG4 [98-110]	Q9QXG4 1xCarbamidomethyl [C104]	0	1496.72	High	n/a	High		7.935e-06		1.631e-06	3.34
Q9QXG4	Acetyl-coenzyme A synthetase, cytoplasmic OS=Mus musculus OX=10090 GN=Acss2 PE=1 SV=2	[K].GFPVRCCIVVK.[H]	2xCarbamidomethyl [C6; C7]	0.0148566	0.000537414	1	1	1	1	Q9QXG4 [241-251]	Q9QXG4 2xCarbamidomethyl [C246; C247]	1	1334.71	High	n/a	High		0.000146		0.00149	2.11
Q99J27	Acetyl-coenzyme A transporter 1 OS=Mus musculus OX=10090 GN=Slc33a1 PE=1 SV=1	[R].TPDAIELCK.[K]	1xCarbamidomethyl [C8]	0.00538808	0.000289748	1	1	1	2	Q99J27 [490-498]	Q99J27 1xCarbamidomethyl [C497]	0	1046.52	High	n/a	High		7.049e-05		0.0005166	2.35
Q9WV54	Acid ceramidase OS=Mus musculus OX=10090 GN=Asah1 PE=1 SV=1	[K].CLNHTTQK.[N]	1xCarbamidomethyl [C1]	0.00244937	0.000170803	1	1	1	1	Q9WV54 [339-346]	Q9WV54 1xCarbamidomethyl [C339]	0	1001.48	High	n/a	High		3.462e-05		0.0002312	1.53
Q9WV54	Acid ceramidase OS=Mus musculus OX=10090 GN=Asah1 PE=1 SV=1	[K].SGEGCVITRER.[K]	1xCarbamidomethyl [C5]	5.04436e-06	3.46687e-05	1	1	1	2	Q9WV54 [287-297]	Q9WV54 1xCarbamidomethyl [C291]	1	1263.61	High	n/a	High		7.935e-06		3.567e-07	2.43
Q9WV54	Acid ceramidase OS=Mus musculus OX=10090 GN=Asah1 PE=1 SV=1	[K].SGEGCVITR.[E]	1xCarbamidomethyl [C5]	0.00023283	3.46687e-05	1	1	1	8	Q9WV54 [287-295]	Q9WV54 1xCarbamidomethyl [C291]	0	978.467	High	n/a	High		7.935e-06		2.028e-05	1.33
Q9WV54	Acid ceramidase OS=Mus musculus OX=10090 GN=Asah1 PE=1 SV=1	[R].TPAKKCLNHTTQK.[N]	1xCarbamidomethyl [C6]	1.94661e-08	3.46687e-05	1	1	1	4	Q9WV54 [334-346]	Q9WV54 1xCarbamidomethyl [C339]	2	1526.81	High	n/a	High		7.935e-06		1.011e-09	2.79
Q9WV54	Acid ceramidase OS=Mus musculus OX=10090 GN=Asah1 PE=1 SV=1	[K].KSGEGCVITR.[E]	1xCarbamidomethyl [C6]	0.00176413	0.000136771	1	1	1	1	Q9WV54 [286-295]	Q9WV54 1xCarbamidomethyl [C291]	1	1106.56	High	n/a	High		2.796e-05		0.0001653	1.99
Q9WV54	Acid ceramidase OS=Mus musculus OX=10090 GN=Asah1 PE=1 SV=1	[K].KSGEGCVITRER.[K]	1xCarbamidomethyl [C6]	0.0322566	0.00101508	1	1	1	1	Q9WV54 [286-297]	Q9WV54 1xCarbamidomethyl [C291]	2	1391.71	High	n/a	High		0.0003		0.003488	2.36
Q9WV54	Acid ceramidase OS=Mus musculus OX=10090 GN=Asah1 PE=1 SV=1	[K].GQFESHLRDCPDPCIGW.[-]	2xCarbamidomethyl [C10; C14]	2.01864e-06	3.46687e-05	1	1	1	3	Q9WV54 [378-394]	Q9WV54 2xCarbamidomethyl [C387; C391]	1	2073.89	High	n/a	High		7.935e-06		1.351e-07	2.93
Q9JI19	Acidic fibroblast growth factor intracellular-binding protein OS=Mus musculus OX=10090 GN=Fibp PE=1 SV=1	[K].VLVADKDLLDLHKSLVCTALR.[G]	1xCarbamidomethyl [C17]	1.22548e-09	3.46687e-05	1	1	1	1	Q9JI19 [239-259]	Q9JI19 1xCarbamidomethyl [C255]	2	2379.34	High	n/a	High		7.935e-06		5.479e-11	4.73
Q9JI19	Acidic fibroblast growth factor intracellular-binding protein OS=Mus musculus OX=10090 GN=Fibp PE=1 SV=1	[K].SLVCTALR.[G]	1xCarbamidomethyl [C4]	0.0236138	0.000806488	1	1	1	11	Q9JI19 [252-259]	Q9JI19 1xCarbamidomethyl [C255]	0	919.503	High	n/a	High		0.0002409		0.002464	1.93
O35381	Acidic leucine-rich nuclear phosphoprotein 32 family member A OS=Mus musculus OX=10090 GN=Anp32a PE=1 SV=1	[R].ISGDLEVLAEKCPNLK.[H]	1xCarbamidomethyl [C12]	2.82901e-07	3.46687e-05	1	2	1	6	O35381 [76-91]	O35381 1xCarbamidomethyl [C87]	1	1785.94	High	n/a	High		7.935e-06		1.709e-08	4.11
O35381	Acidic leucine-rich nuclear phosphoprotein 32 family member A OS=Mus musculus OX=10090 GN=Anp32a PE=1 SV=1	[K].SLDLFNCEVTNLNAYR.[E]	1xCarbamidomethyl [C7]	6.8807e-08	3.46687e-05	1	1	1	2	O35381 [117-132]	O35381 1xCarbamidomethyl [C123]	0	1928.92	High	n/a	High		7.935e-06		3.815e-09	4.71
Q9EST5	Acidic leucine-rich nuclear phosphoprotein 32 family member B OS=Mus musculus OX=10090 GN=Anp32b PE=1 SV=1	[K].SLDLFGCEVTNR.[S]	1xCarbamidomethyl [C7]	2.20715e-05	3.46687e-05	1	2	1	2	Q9EST5 [117-128]	Q9EST5 1xCarbamidomethyl [C123]	0	1410.67	High	n/a	High		7.935e-06		1.688e-06	3.04
Q9EST5; O35381	Acidic leucine-rich nuclear phosphoprotein 32 family member B OS=Mus musculus OX=10090 GN=Anp32b PE=1 SV=1 Acidic leucine-rich nuclear phosphoprotein 32 family member A OS=Mus musculus OX=10090 GN=Anp32a PE=1 SV=1	[RK].ELVLDNCK.[AS]	1xCarbamidomethyl [C7]	0.00402323	0.000259952	2	3	1	2	Q9EST5 [21-28]; O35381 [21-28]	Q9EST5 1xCarbamidomethyl [C27]; O35381 1xCarbamidomethyl [C27]	0	990.492	High	n/a	High		5.247e-05		0.000384	1.74
Q6NXK8	Acid-sensing ion channel 1 OS=Mus musculus OX=10090 GN=Asic1 PE=1 SV=1	[K].LDEVAASQLTFPAVTLCNLNEFR.[F]	1xCarbamidomethyl [C17]	7.78386e-11	3.46687e-05	1	1	1	3	Q6NXK8 [77-99]	Q6NXK8 1xCarbamidomethyl [C93]	0	2608.31	High	n/a	High		7.935e-06		2.981e-12	5.95
Q6NXK8	Acid-sensing ion channel 1 OS=Mus musculus OX=10090 GN=Asic1 PE=1 SV=1	[K].ECADPALDFLVEK.[D]	1xCarbamidomethyl [C2]	0.000137804	3.46687e-05	1	2	1	2	Q6NXK8 [342-354]	Q6NXK8 1xCarbamidomethyl [C343]	0	1506.71	High	n/a	High		7.935e-06		1.165e-05	2.07
Q6NXK8	Acid-sensing ion channel 1 OS=Mus musculus OX=10090 GN=Asic1 PE=1 SV=1	[R].HNPCESLR.[G]	1xCarbamidomethyl [C4]	0.00189388	0.000136771	1	2	1	12	Q6NXK8 [492-499]	Q6NXK8 1xCarbamidomethyl [C495]	0	1012.46	High	n/a	High		2.796e-05		0.0001776	1.26
Q6NXK8	Acid-sensing ion channel 1 OS=Mus musculus OX=10090 GN=Asic1 PE=1 SV=1	[K].RHNPCESLR.[G]	1xCarbamidomethyl [C5]	7.941e-05	3.46687e-05	1	2	1	7	Q6NXK8 [491-499]	Q6NXK8 1xCarbamidomethyl [C495]	1	1168.56	High	n/a	High		7.935e-06		6.504e-06	3.62
Q6NXK8	Acid-sensing ion channel 1 OS=Mus musculus OX=10090 GN=Asic1 PE=1 SV=1	[R].VQYYFCYHHVTK.[L]	1xCarbamidomethyl [C6]	9.1524e-06	3.46687e-05	1	1	1	1	Q6NXK8 [65-76]	Q6NXK8 1xCarbamidomethyl [C70]	0	1644.76	High	n/a	High		7.935e-06		6.667e-07	2.52
Q6NXK8	Acid-sensing ion channel 1 OS=Mus musculus OX=10090 GN=Asic1 PE=1 SV=1	[R].DMLLSCHFR.[G]	1xCarbamidomethyl [C6]	8.91148e-06	3.46687e-05	1	1	1	14	Q6NXK8 [167-175]	Q6NXK8 1xCarbamidomethyl [C172]	0	1178.54	High	n/a	High		7.935e-06		6.491e-07	2.05
Q6NXK8	Acid-sensing ion channel 1 OS=Mus musculus OX=10090 GN=Asic1 PE=1 SV=1	[R].DMLLSCHFR.[G]	1xCarbamidomethyl [C6]; 1xOxidation [M2]	2.39017e-06	3.46687e-05	1	1	1	6	Q6NXK8 [167-175]	Q6NXK8 1xCarbamidomethyl [C172]	0	1194.54	High	n/a	High		7.935e-06		1.612e-07	2.14
Q6NXK8; Q925H0-2	Acid-sensing ion channel 1 OS=Mus musculus OX=10090 GN=Asic1 PE=1 SV=1 Isoform 2 of Acid-sensing ion channel 2 OS=Mus musculus OX=10090 GN=Asic2	[R].YIVENCNCR.[M]	2xCarbamidomethyl [C6; C8]	0.000142792	3.46687e-05	2	4	1	12	Q6NXK8 [316-324]; Q925H0-2 [366-374]	Q6NXK8 2xCarbamidomethyl [C321; C323]; Q925H0-2 2xCarbamidomethyl [C371; C373]	0	1227.52	High	n/a	High		7.935e-06		1.204e-05	1.69
Q7TNS7	Acid-sensing ion channel 4 OS=Mus musculus OX=10090 GN=Asic4 PE=2 SV=1	[R].LTYLPQPWGNCR.[A]	1xCarbamidomethyl [C11]	3.14986e-05	3.46687e-05	1	1	1	1	Q7TNS7 [286-297]	Q7TNS7 1xCarbamidomethyl [C296]	0	1504.74	High	n/a	High		7.935e-06		2.451e-06	2.79
Q7TNS7	Acid-sensing ion channel 4 OS=Mus musculus OX=10090 GN=Asic4 PE=2 SV=1	[R].ACGPGPHGLR.[R]	1xCarbamidomethyl [C2]	3.56741e-05	3.46687e-05	1	1	1	6	Q7TNS7 [57-66]	Q7TNS7 1xCarbamidomethyl [C58]	0	1021.5	High	n/a	High		7.935e-06		2.799e-06	2.56
Q99KI0	Aconitate hydratase, mitochondrial OS=Mus musculus OX=10090 GN=Aco2 PE=1 SV=1	[K].CKSQFTITPGSEQIR.[A]	1xCarbamidomethyl [C1]	1.0737e-06	3.46687e-05	1	1	1	3	Q99KI0 [410-424]	Q99KI0 1xCarbamidomethyl [C410]	1	1751.87	High	n/a	High		7.935e-06		6.942e-08	3.27
Q99KI0	Aconitate hydratase, mitochondrial OS=Mus musculus OX=10090 GN=Aco2 PE=1 SV=1	[K].CTTDHISAAGPWLK.[F]	1xCarbamidomethyl [C1]	1.7496e-08	3.46687e-05	1	1	1	11	Q99KI0 [592-605]	Q99KI0 1xCarbamidomethyl [C592]	0	1556.75	High	n/a	High		7.935e-06		8.986e-10	6.18
Q99KI0	Aconitate hydratase, mitochondrial OS=Mus musculus OX=10090 GN=Aco2 PE=1 SV=1	[K].DFAPGKPLKCVIK.[H]	1xCarbamidomethyl [C10]	2.30577e-07	3.46687e-05	1	1	1	26	Q99KI0 [731-743]	Q99KI0 1xCarbamidomethyl [C740]	1	1472.83	High	n/a	High		7.935e-06		1.372e-08	3.38
Q99KI0	Aconitate hydratase, mitochondrial OS=Mus musculus OX=10090 GN=Aco2 PE=1 SV=1	[R].SAAVAKQALAHGLKCK.[S]	1xCarbamidomethyl [C15]	4.61344e-07	3.46687e-05	1	1	1	3	Q99KI0 [396-411]	Q99KI0 1xCarbamidomethyl [C410]	2	1652.93	High	n/a	High		7.935e-06		2.84e-08	3.76
Q99KI0	Aconitate hydratase, mitochondrial OS=Mus musculus OX=10090 GN=Aco2 PE=1 SV=1	[K].GKCTTDHISAAGPWLK.[F]	1xCarbamidomethyl [C3]	1.38794e-09	3.46687e-05	1	1	1	11	Q99KI0 [590-605]	Q99KI0 1xCarbamidomethyl [C592]	1	1741.87	High	n/a	High		7.935e-06		6.202e-11	4.06
Q99KI0	Aconitate hydratase, mitochondrial OS=Mus musculus OX=10090 GN=Aco2 PE=1 SV=1	[R].VAMQDATAQMAMLQFISSGLPKVAVPSTIHCDHLIEAQVGGEK.[D]	1xCarbamidomethyl [C31]	5.27169e-07	3.46687e-05	1	1	1	1	Q99KI0 [96-138]	Q99KI0 1xCarbamidomethyl [C126]	1	4579.28	High	n/a	High		0.0002131		1.552e-05	8.17
Q99KI0	Aconitate hydratase, mitochondrial OS=Mus musculus OX=10090 GN=Aco2 PE=1 SV=1	[R].VAMQDATAQMAMLQFISSGLPKVAVPSTIHCDHLIEAQVGGEK.[D]	1xCarbamidomethyl [C31]; 1xOxidation [M3]	4.29667e-07	3.46687e-05	1	1	1	1	Q99KI0 [96-138]	Q99KI0 1xCarbamidomethyl [C126]	1	4595.28	High	n/a	High		0.0002131		1.37e-05	6.48
Q99KI0	Aconitate hydratase, mitochondrial OS=Mus musculus OX=10090 GN=Aco2 PE=1 SV=1	[K].VKGKCTTDHISAAGPWLK.[F]	1xCarbamidomethyl [C5]	4.77314e-11	3.46687e-05	1	1	1	9	Q99KI0 [588-605]	Q99KI0 1xCarbamidomethyl [C592]	2	1969.03	High	n/a	High		7.935e-06		1.781e-12	6.32
Q99KI0	Aconitate hydratase, mitochondrial OS=Mus musculus OX=10090 GN=Aco2 PE=1 SV=1	[R].VGLIGSCTNSSYEDMGR.[S]	1xCarbamidomethyl [C7]	1.04463e-08	3.46687e-05	1	1	1	26	Q99KI0 [379-395]	Q99KI0 1xCarbamidomethyl [C385]	0	1845.81	High	n/a	High		7.935e-06		5.241e-10	3.38
Q99KI0	Aconitate hydratase, mitochondrial OS=Mus musculus OX=10090 GN=Aco2 PE=1 SV=1	[R].VGLIGSCTNSSYEDMGR.[S]	1xCarbamidomethyl [C7]; 1xOxidation [M15]	7.65548e-08	3.46687e-05	1	1	1	22	Q99KI0 [379-395]	Q99KI0 1xCarbamidomethyl [C385]	0	1861.81	High	n/a	High		7.935e-06		4.289e-09	2.27
Q99KI0	Aconitate hydratase, mitochondrial OS=Mus musculus OX=10090 GN=Aco2 PE=1 SV=1	[K].QALAHGLKCKSQFTITPGSEQIR.[A]	1xCarbamidomethyl [C9]	3.56482e-07	3.46687e-05	1	1	1	20	Q99KI0 [402-424]	Q99KI0 1xCarbamidomethyl [C410]	2	2570.35	High	n/a	High		7.935e-06		2.18e-08	4.78
Q99KI0	Aconitate hydratase, mitochondrial OS=Mus musculus OX=10090 GN=Aco2 PE=1 SV=1	[K].QALAHGLKCK.[S]	1xCarbamidomethyl [C9]	5.56446e-05	3.46687e-05	1	1	1	11	Q99KI0 [402-411]	Q99KI0 1xCarbamidomethyl [C410]	1	1125.62	High	n/a	High		7.935e-06		4.481e-06	2.19
Q99KI0	Aconitate hydratase, mitochondrial OS=Mus musculus OX=10090 GN=Aco2 PE=1 SV=1	[K].VAVPSTIHCDHLIEAQVGGEKDLRR.[A]	1xCarbamidomethyl [C9]	8.2933e-08	3.46687e-05	1	1	1	1	Q99KI0 [118-142]	Q99KI0 1xCarbamidomethyl [C126]	2	2800.45	High	n/a	High		7.935e-06		4.651e-09	7.01
Q99KI0	Aconitate hydratase, mitochondrial OS=Mus musculus OX=10090 GN=Aco2 PE=1 SV=1	[K].VAVPSTIHCDHLIEAQVGGEKDLR.[R]	1xCarbamidomethyl [C9]	9.2236e-09	3.46687e-05	1	1	1	7	Q99KI0 [118-141]	Q99KI0 1xCarbamidomethyl [C126]	1	2644.35	High	n/a	High		7.935e-06		4.603e-10	4.67
Q99KI0	Aconitate hydratase, mitochondrial OS=Mus musculus OX=10090 GN=Aco2 PE=1 SV=1	[K].VAVPSTIHCDHLIEAQVGGEK.[D]	1xCarbamidomethyl [C9]	1.54363e-10	3.46687e-05	1	1	1	93	Q99KI0 [118-138]	Q99KI0 1xCarbamidomethyl [C126]	0	2260.14	High	n/a	High		7.935e-06		6.116e-12	4.53
Q99KI0	Aconitate hydratase, mitochondrial OS=Mus musculus OX=10090 GN=Aco2 PE=1 SV=1	[R].DVGGIVLANACGPCIGQWDRK.[D]	2xCarbamidomethyl [C11; C14]	2.77488e-11	3.46687e-05	1	1	1	8	Q99KI0 [438-458]	Q99KI0 2xCarbamidomethyl [C448; C451]	1	2286.11	High	n/a	High		7.935e-06		1.001e-12	4.99
Q99KI0	Aconitate hydratase, mitochondrial OS=Mus musculus OX=10090 GN=Aco2 PE=1 SV=1	[R].DVGGIVLANACGPCIGQWDR.[K]	2xCarbamidomethyl [C11; C14]	3.11611e-10	3.46687e-05	1	1	1	42	Q99KI0 [438-457]	Q99KI0 2xCarbamidomethyl [C448; C451]	0	2158.02	High	n/a	High		7.935e-06		1.288e-11	5.02
Q99KI0	Aconitate hydratase, mitochondrial OS=Mus musculus OX=10090 GN=Aco2 PE=1 SV=1	[R].DVGGIVLANACGPCIGQWDRKDIK.[K]	2xCarbamidomethyl [C11; C14]	2.01477e-11	3.46687e-05	1	1	1	1	Q99KI0 [438-461]	Q99KI0 2xCarbamidomethyl [C448; C451]	2	2642.32	High	n/a	High		7.935e-06		7.19e-13	5.93
Q99KI0	Aconitate hydratase, mitochondrial OS=Mus musculus OX=10090 GN=Aco2 PE=1 SV=1	[R].DGYAQILRDVGGIVLANACGPCIGQWDR.[K]	2xCarbamidomethyl [C19; C22]	1.68847e-08	3.46687e-05	1	1	1	1	Q99KI0 [430-457]	Q99KI0 2xCarbamidomethyl [C448; C451]	1	3074.49	High	n/a	High		7.935e-06		8.717e-10	4.46
Q99KI0	Aconitate hydratase, mitochondrial OS=Mus musculus OX=10090 GN=Aco2 PE=1 SV=1	[K].GGTGAIVEYHGPGVDSISCTGMATICNMGAEIGATTSVFPYNHR.[M]	2xCarbamidomethyl [C19; C26]	0.173577	0.00613106	1	1	1	1	Q99KI0 [259-302]	Q99KI0 2xCarbamidomethyl [C277; C284]	0	4556.07	High	n/a	High		0.0002131		0.03692	3.56
Q8BZI0	Actin filament-associated protein 1-like 1 OS=Mus musculus OX=10090 GN=Afap1l1 PE=1 SV=1	[RK].ICAFLLR.[K]	1xCarbamidomethyl [C2]	0.0143439	0.000508083	1	3	1	5	Q8BZI0 [223-229]	Q8BZI0 1xCarbamidomethyl [C224]	0	892.507	High	n/a	High		0.0001348		0.001438	2.01
Q8BZI0	Actin filament-associated protein 1-like 1 OS=Mus musculus OX=10090 GN=Afap1l1 PE=1 SV=1	[R].SPVILCK.[A]	1xCarbamidomethyl [C6]	0.0565814	0.00162838	1	2	1	2	Q8BZI0 [329-335]	Q8BZI0 1xCarbamidomethyl [C334]	0	816.465	High	n/a	High		0.0004489		0.006783	1.76
Q5DTU0	Actin filament-associated protein 1-like 2 OS=Mus musculus OX=10090 GN=Afap1l2 PE=1 SV=2	[R].ICAFLWR.[K]	1xCarbamidomethyl [C2]	0.0933777	0.00302083	1	2	1	1	Q5DTU0 [178-184]	Q5DTU0 1xCarbamidomethyl [C179]	0	965.503	High	n/a	High		0.00079		0.01295	2.73
Q5DTU0	Actin filament-associated protein 1-like 2 OS=Mus musculus OX=10090 GN=Afap1l2 PE=1 SV=2	[R].VSCIVSAAK.[T]	1xCarbamidomethyl [C3]	0.00265282	0.000202726	1	2	1	1	Q5DTU0 [465-473]	Q5DTU0 1xCarbamidomethyl [C467]	0	934.503	High	n/a	High		3.462e-05		0.0002504	2.94
P68134	Actin, alpha skeletal muscle OS=Mus musculus OX=10090 GN=Acta1 PE=1 SV=1	[K].QEYDEAGPSIVHRKCF.[-]	1xCarbamidomethyl [C15]	7.72089e-09	3.46687e-05	1	3	1	11	P68134 [362-377]	P68134 1xCarbamidomethyl [C376]	2	1935.9	High	n/a	High		7.935e-06		3.794e-10	3.96
P68134	Actin, alpha skeletal muscle OS=Mus musculus OX=10090 GN=Acta1 PE=1 SV=1	[K].LCYVALDFENEMATAASSSSLEK.[S]	1xCarbamidomethyl [C2]	2.90103e-11	3.46687e-05	1	4	1	33	P68134 [218-240]	P68134 1xCarbamidomethyl [C219]	0	2536.16	High	n/a	High		7.935e-06		1.052e-12	5.39
P68134	Actin, alpha skeletal muscle OS=Mus musculus OX=10090 GN=Acta1 PE=1 SV=1	[K].LCYVALDFENEMATAASSSSLEK.[S]	1xCarbamidomethyl [C2]; 1xOxidation [M12]	4.77498e-10	3.46687e-05	1	4	1	39	P68134 [218-240]	P68134 1xCarbamidomethyl [C219]	0	2552.15	High	Low	High	0.08597	7.935e-06	0.1136	2.025e-11	3.34	18
P68134	Actin, alpha skeletal muscle OS=Mus musculus OX=10090 GN=Acta1 PE=1 SV=1	[K].EKLCYVALDFENEMATAASSSSLEK.[S]	1xCarbamidomethyl [C4]; 1xOxidation [M14]	6.24196e-07	3.46687e-05	1	4	1	8	P68134 [216-240]	P68134 1xCarbamidomethyl [C219]	1	2809.29	High	n/a	High		7.935e-06		3.904e-08	4.66
P68134	Actin, alpha skeletal muscle OS=Mus musculus OX=10090 GN=Acta1 PE=1 SV=1	[R].DIKEKLCYVALDFENEMATAASSSSLEK.[S]	1xCarbamidomethyl [C7]	2.47102e-12	3.46687e-05	1	4	1	2	P68134 [213-240]	P68134 1xCarbamidomethyl [C219]	2	3149.5	High	n/a	High		7.935e-06		7.85e-14	6.58
P68134	Actin, alpha skeletal muscle OS=Mus musculus OX=10090 GN=Acta1 PE=1 SV=1	[R].DIKEKLCYVALDFENEMATAASSSSLEK.[S]	1xCarbamidomethyl [C7]; 1xOxidation [M17]	3.50198e-07	3.46687e-05	1	4	1	3	P68134 [213-240]	P68134 1xCarbamidomethyl [C219]	2	3165.5	High	n/a	High		7.935e-06		2.13e-08	5.02
P60710	Actin, cytoplasmic 1 OS=Mus musculus OX=10090 GN=Actb PE=1 SV=1	[-].MDDDIAALVVDNGSGMCKAGFAGDDAPR.[A]	1xCarbamidomethyl [C17]; 1xMet-loss+Acetyl [N-Term]	2.51439e-13	3.46687e-05	1	1	1	28	P60710 [1-28]	P60710 1xCarbamidomethyl [C17]; 1xMet-loss+Acetyl [N-Term]	1	2779.23	High	n/a	High		0.0002131		2.304e-09	7.73
P60710	Actin, cytoplasmic 1 OS=Mus musculus OX=10090 GN=Actb PE=1 SV=1	[-].MDDDIAALVVDNGSGMCK.[A]	1xCarbamidomethyl [C17]; 1xMet-loss+Acetyl [N-Term]	1.36452e-07	3.46687e-05	1	1	1	23	P60710 [1-18]	P60710 1xCarbamidomethyl [C17]; 1xMet-loss+Acetyl [N-Term]	0	1821.8	High	n/a	High		0.0002131		6.818e-06	5.54
P60710	Actin, cytoplasmic 1 OS=Mus musculus OX=10090 GN=Actb PE=1 SV=1	[-].MDDDIAALVVDNGSGMCK.[A]	1xCarbamidomethyl [C17]; 1xOxidation [M16]; 1xMet-loss+Acetyl [N-Term]	6.13194e-07	3.46687e-05	1	1	1	20	P60710 [1-18]	P60710 1xCarbamidomethyl [C17]; 1xMet-loss+Acetyl [N-Term]	0	1837.79	High	n/a	High		0.0002131		1.695e-05	3.76
P60710	Actin, cytoplasmic 1 OS=Mus musculus OX=10090 GN=Actb PE=1 SV=1	[-].MDDDIAALVVDNGSGMCKAGFAGDDAPR.[A]	1xCarbamidomethyl [C17]; 1xOxidation [M16]; 1xMet-loss+Acetyl [N-Term]	1.73411e-08	3.46687e-05	1	1	1	23	P60710 [1-28]	P60710 1xCarbamidomethyl [C17]; 1xMet-loss+Acetyl [N-Term]	1	2795.22	High	n/a	High		0.0002131		1.956e-06	5.1
P60710	Actin, cytoplasmic 1 OS=Mus musculus OX=10090 GN=Actb PE=1 SV=1	[-].MDDDIAALVVDNGSGMCKAGFAGDDAPR.[A]	1xCarbamidomethyl [C17]; 2xOxidation [M1; M16]	0.171079	0.00600513	1	1	1	1	P60710 [1-28]	P60710 1xCarbamidomethyl [C17]	1	2900.25	High	n/a	High		0.001483		0.03101	1.15
P60710; P63260	Actin, cytoplasmic 1 OS=Mus musculus OX=10090 GN=Actb PE=1 SV=1 Actin, cytoplasmic 2 OS=Mus musculus OX=10090 GN=Actg1 PE=1 SV=1	[K].CDVDIRKDLYANTVLSGGTTMYPGIADR.[M]	1xCarbamidomethyl [C1]	6.13618e-05	3.46687e-05	2	2	1	1	P60710 [285-312]; P63260 [285-312]	P60710 1xCarbamidomethyl [C285]; P63260 1xCarbamidomethyl [C285]	2	3101.5	High	n/a	High		7.935e-06		4.958e-06	7.43
P60710; P63260	Actin, cytoplasmic 1 OS=Mus musculus OX=10090 GN=Actb PE=1 SV=1 Actin, cytoplasmic 2 OS=Mus musculus OX=10090 GN=Actg1 PE=1 SV=1	[K].CDVDIRKDLYANTVLSGGTTMYPGIADR.[M]	1xCarbamidomethyl [C1]; 1xOxidation [M21]	4.257e-08	3.46687e-05	2	2	1	1	P60710 [285-312]; P63260 [285-312]	P60710 1xCarbamidomethyl [C285]; P63260 1xCarbamidomethyl [C285]	2	3117.5	High	n/a	High		7.935e-06		2.301e-09	4.99
P60710; P63260	Actin, cytoplasmic 1 OS=Mus musculus OX=10090 GN=Actb PE=1 SV=1 Actin, cytoplasmic 2 OS=Mus musculus OX=10090 GN=Actg1 PE=1 SV=1	[K].QEYDESGPSIVHRKCF.[-]	1xCarbamidomethyl [C15]	1.61318e-11	3.46687e-05	2	2	1	75	P60710 [360-375]; P63260 [360-375]	P60710 1xCarbamidomethyl [C374]; P63260 1xCarbamidomethyl [C374]	2	1951.9	High	n/a	High		7.935e-06		5.679e-13	5.33
P60710; P63260	Actin, cytoplasmic 1 OS=Mus musculus OX=10090 GN=Actb PE=1 SV=1 Actin, cytoplasmic 2 OS=Mus musculus OX=10090 GN=Actg1 PE=1 SV=1	[K].LCYVALDFEQEMATAASSSSLEK.[S]	1xCarbamidomethyl [C2]	1.89246e-12	3.46687e-05	2	2	1	884	P60710 [216-238]; P63260 [216-238]	P60710 1xCarbamidomethyl [C217]; P63260 1xCarbamidomethyl [C217]	0	2550.17	High	n/a	High		7.935e-06		5.906e-14	4.71
P60710; P63260	Actin, cytoplasmic 1 OS=Mus musculus OX=10090 GN=Actb PE=1 SV=1 Actin, cytoplasmic 2 OS=Mus musculus OX=10090 GN=Actg1 PE=1 SV=1	[K].LCYVALDFEQEMATAASSSSLEK.[S]	1xCarbamidomethyl [C2]; 1xOxidation [M12]	2.14416e-11	3.46687e-05	2	2	1	654	P60710 [216-238]; P63260 [216-238]	P60710 1xCarbamidomethyl [C217]; P63260 1xCarbamidomethyl [C217]	0	2566.17	High	n/a	High		7.935e-06		7.634e-13	3.51
P60710; P63260	Actin, cytoplasmic 1 OS=Mus musculus OX=10090 GN=Actb PE=1 SV=1 Actin, cytoplasmic 2 OS=Mus musculus OX=10090 GN=Actg1 PE=1 SV=1	[K].EKLCYVALDFEQEMATAASSSSLEK.[S]	1xCarbamidomethyl [C4]	2.34264e-12	3.46687e-05	2	2	1	121	P60710 [214-238]; P63260 [214-238]	P60710 1xCarbamidomethyl [C217]; P63260 1xCarbamidomethyl [C217]	1	2807.31	High	n/a	High		7.935e-06		7.372e-14	5.39
P60710; P63260	Actin, cytoplasmic 1 OS=Mus musculus OX=10090 GN=Actb PE=1 SV=1 Actin, cytoplasmic 2 OS=Mus musculus OX=10090 GN=Actg1 PE=1 SV=1	[K].EKLCYVALDFEQEMATAASSSSLEK.[S]	1xCarbamidomethyl [C4]; 1xOxidation [M14]	7.78087e-12	3.46687e-05	2	2	1	87	P60710 [214-238]; P63260 [214-238]	P60710 1xCarbamidomethyl [C217]; P63260 1xCarbamidomethyl [C217]	1	2823.31	High	n/a	High		7.935e-06		2.633e-13	5.88
P60710; P63260	Actin, cytoplasmic 1 OS=Mus musculus OX=10090 GN=Actb PE=1 SV=1 Actin, cytoplasmic 2 OS=Mus musculus OX=10090 GN=Actg1 PE=1 SV=1	[R].DIKEKLCYVALDFEQEMATAASSSSLEK.[S]	1xCarbamidomethyl [C7]	7.05045e-14	3.46687e-05	2	2	1	63	P60710 [211-238]; P63260 [211-238]	P60710 1xCarbamidomethyl [C217]; P63260 1xCarbamidomethyl [C217]	2	3163.52	High	n/a	High		7.935e-06		1.839e-15	7.37
P60710; P63260	Actin, cytoplasmic 1 OS=Mus musculus OX=10090 GN=Actb PE=1 SV=1 Actin, cytoplasmic 2 OS=Mus musculus OX=10090 GN=Actg1 PE=1 SV=1	[R].DIKEKLCYVALDFEQEMATAASSSSLEK.[S]	1xCarbamidomethyl [C7]; 1xOxidation [M17]	1.81016e-12	3.46687e-05	2	2	1	81	P60710 [211-238]; P63260 [211-238]	P60710 1xCarbamidomethyl [C217]; P63260 1xCarbamidomethyl [C217]	2	3179.51	High	n/a	High		7.935e-06		5.608e-14	6.69
P60710; P63260	Actin, cytoplasmic 1 OS=Mus musculus OX=10090 GN=Actb PE=1 SV=1 Actin, cytoplasmic 2 OS=Mus musculus OX=10090 GN=Actg1 PE=1 SV=1	[R].CPEALFQPSFLGMESCGIHETTFNSIMK.[C]	2xCarbamidomethyl [C1; C16]	6.64282e-07	3.46687e-05	2	2	1	1	P60710 [257-284]; P63260 [257-284]	P60710 2xCarbamidomethyl [C257; C272]; P63260 2xCarbamidomethyl [C257; C272]	0	3231.46	High	n/a	High		7.935e-06		4.17e-08	3.02
P60710; P63260	Actin, cytoplasmic 1 OS=Mus musculus OX=10090 GN=Actb PE=1 SV=1 Actin, cytoplasmic 2 OS=Mus musculus OX=10090 GN=Actg1 PE=1 SV=1	[R].CPEALFQPSFLGMESCGIHETTFNSIMK.[C]	2xCarbamidomethyl [C1; C16]; 1xOxidation [M27]	0.0244498	0.000861342	2	2	1	1	P60710 [257-284]; P63260 [257-284]	P60710 2xCarbamidomethyl [C257; C272]; P63260 2xCarbamidomethyl [C257; C272]	0	3247.46	High	n/a	High		0.000246		0.002542	2.1
P60710; P63260	Actin, cytoplasmic 1 OS=Mus musculus OX=10090 GN=Actb PE=1 SV=1 Actin, cytoplasmic 2 OS=Mus musculus OX=10090 GN=Actg1 PE=1 SV=1	[R].CPEALFQPSFLGMESCGIHETTFNSIMK.[C]	2xCarbamidomethyl [C1; C16]; 2xOxidation [M13; M27]	0.195953	0.00692208	2	2	1	1	P60710 [257-284]; P63260 [257-284]	P60710 2xCarbamidomethyl [C257; C272]; P63260 2xCarbamidomethyl [C257; C272]	0	3263.45	High	n/a	High		0.001722		0.03823	2.39
P60710; P63260	Actin, cytoplasmic 1 OS=Mus musculus OX=10090 GN=Actb PE=1 SV=1 Actin, cytoplasmic 2 OS=Mus musculus OX=10090 GN=Actg1 PE=1 SV=1	[R].FRCPEALFQPSFLGMESCGIHETTFNSIMK.[C]	2xCarbamidomethyl [C3; C18]	1.68587e-12	3.46687e-05	2	2	1	6	P60710 [255-284]; P63260 [255-284]	P60710 2xCarbamidomethyl [C257; C272]; P63260 2xCarbamidomethyl [C257; C272]	1	3534.63	High	n/a	High		7.935e-06		5.204e-14	7.36
P60710; P63260	Actin, cytoplasmic 1 OS=Mus musculus OX=10090 GN=Actb PE=1 SV=1 Actin, cytoplasmic 2 OS=Mus musculus OX=10090 GN=Actg1 PE=1 SV=1	[R].FRCPEALFQPSFLGMESCGIHETTFNSIMK.[C]	2xCarbamidomethyl [C3; C18]; 1xOxidation [M]	4.36705e-11	3.46687e-05	2	2	2	6	P60710 [255-284]; P63260 [255-284]	P60710 2xCarbamidomethyl [C257; C272]; P63260 2xCarbamidomethyl [C257; C272]	1	3550.63	High	n/a	High		7.935e-06		1.623e-12	5.77
P60710; P63260	Actin, cytoplasmic 1 OS=Mus musculus OX=10090 GN=Actb PE=1 SV=1 Actin, cytoplasmic 2 OS=Mus musculus OX=10090 GN=Actg1 PE=1 SV=1	[R].FRCPEALFQPSFLGMESCGIHETTFNSIMK.[C]	2xCarbamidomethyl [C3; C18]; 2xOxidation [M15; M29]	1.70355e-08	3.46687e-05	2	2	1	5	P60710 [255-284]; P63260 [255-284]	P60710 2xCarbamidomethyl [C257; C272]; P63260 2xCarbamidomethyl [C257; C272]	1	3566.62	High	n/a	High		7.935e-06		8.763e-10	5.36
P60710; P63260	Actin, cytoplasmic 1 OS=Mus musculus OX=10090 GN=Actb PE=1 SV=1 Actin, cytoplasmic 2 OS=Mus musculus OX=10090 GN=Actg1 PE=1 SV=1	[R].FRCPEALFQPSFLGMESCGIHETTFNSIMKCDVDIR.[K]	3xCarbamidomethyl [C3; C18; C31]; 1xOxidation [M29]	0.000114336	3.46687e-05	2	2	1	2	P60710 [255-290]; P63260 [255-290]	P60710 3xCarbamidomethyl [C257; C272; C285]; P63260 3xCarbamidomethyl [C257; C272; C285]	2	4308.96	High	n/a	High		0.0002131		0.0004026	5.1
P60710; P63260	Actin, cytoplasmic 1 OS=Mus musculus OX=10090 GN=Actb PE=1 SV=1 Actin, cytoplasmic 2 OS=Mus musculus OX=10090 GN=Actg1 PE=1 SV=1	[R].FRCPEALFQPSFLGMESCGIHETTFNSIMKCDVDIR.[K]	3xCarbamidomethyl [C3; C18; C31]; 2xOxidation [M15; M29]	4.41598e-05	3.46687e-05	2	2	1	3	P60710 [255-290]; P63260 [255-290]	P60710 3xCarbamidomethyl [C257; C272; C285]; P63260 3xCarbamidomethyl [C257; C272; C285]	2	4324.96	High	n/a	High		0.0002131		0.000226	5.36
P63260	Actin, cytoplasmic 2 OS=Mus musculus OX=10090 GN=Actg1 PE=1 SV=1	[-].MEEEIAALVIDNGSGMCKAGFAGDDAPR.[A]	1xCarbamidomethyl [C17]; 1xMet-loss+Acetyl [N-Term]	2.53587e-14	3.46687e-05	1	1	1	20	P63260 [1-28]	P63260 1xCarbamidomethyl [C17]; 1xMet-loss+Acetyl [N-Term]	1	2835.29	High	n/a	High		0.0002131		5.753e-10	7.35
P63260	Actin, cytoplasmic 2 OS=Mus musculus OX=10090 GN=Actg1 PE=1 SV=1	[-].MEEEIAALVIDNGSGMCK.[A]	1xCarbamidomethyl [C17]; 1xMet-loss+Acetyl [N-Term]	2.63375e-08	3.46687e-05	1	1	1	46	P63260 [1-18]	P63260 1xCarbamidomethyl [C17]; 1xMet-loss+Acetyl [N-Term]	0	1877.86	High	n/a	High		0.0002131		2.527e-06	5.87
P63260	Actin, cytoplasmic 2 OS=Mus musculus OX=10090 GN=Actg1 PE=1 SV=1	[-].MEEEIAALVIDNGSGMCKAGFAGDDAPR.[A]	1xCarbamidomethyl [C17]; 1xOxidation [M16]; 1xMet-loss+Acetyl [N-Term]	1.23548e-11	3.46687e-05	1	1	1	10	P63260 [1-28]	P63260 1xCarbamidomethyl [C17]; 1xMet-loss+Acetyl [N-Term]	1	2851.29	High	n/a	High		0.0002131		2.433e-08	6.25
P63260	Actin, cytoplasmic 2 OS=Mus musculus OX=10090 GN=Actg1 PE=1 SV=1	[-].MEEEIAALVIDNGSGMCK.[A]	1xCarbamidomethyl [C17]; 1xOxidation [M16]; 1xMet-loss+Acetyl [N-Term]	8.075e-08	3.46687e-05	1	1	1	26	P63260 [1-18]	P63260 1xCarbamidomethyl [C17]; 1xMet-loss+Acetyl [N-Term]	0	1893.86	High	n/a	High		0.0002131		4.976e-06	4.78
Q8BL65	Actin-binding LIM protein 2 OS=Mus musculus OX=10090 GN=Ablim2 PE=1 SV=1	[K].HWHLGCFK.[C]	1xCarbamidomethyl [C6]	0.000130646	3.46687e-05	1	5	1	27	Q8BL65 [172-179]	Q8BL65 1xCarbamidomethyl [C177]	0	1084.51	High	n/a	High		7.935e-06		1.096e-05	2.9
Q8BL65	Actin-binding LIM protein 2 OS=Mus musculus OX=10090 GN=Ablim2 PE=1 SV=1	[R].QGEHICTR.[D]	1xCarbamidomethyl [C6]	0.00150373	0.000136771	1	5	1	4	Q8BL65 [66-73]	Q8BL65 1xCarbamidomethyl [C71]	0	1000.46	High	n/a	High		2.796e-05		0.0001405	2.56
Q8BL65	Actin-binding LIM protein 2 OS=Mus musculus OX=10090 GN=Ablim2 PE=1 SV=1	[K].ACGCDLAEGGFFVR.[Q]	2xCarbamidomethyl [C2; C4]	5.08749e-07	3.46687e-05	1	5	1	5	Q8BL65 [52-65]	Q8BL65 2xCarbamidomethyl [C53; C55]	0	1558.68	High	n/a	High		7.935e-06		3.157e-08	3.87
Q8BL65	Actin-binding LIM protein 2 OS=Mus musculus OX=10090 GN=Ablim2 PE=1 SV=1	[R].SCGGCGLEIK.[N]	2xCarbamidomethyl [C2; C5]	0.00115222	7.02174e-05	1	5	1	3	Q8BL65 [152-161]	Q8BL65 2xCarbamidomethyl [C153; C156]	0	1080.48	High	n/a	High		1.496e-05		0.0001071	2.06
Q8BL65	Actin-binding LIM protein 2 OS=Mus musculus OX=10090 GN=Ablim2 PE=1 SV=1	[R].LYGTRCFSCDRFIEGEVVSALGK.[T]	2xCarbamidomethyl [C6; C9]	3.0129e-05	3.46687e-05	1	5	1	2	Q8BL65 [78-100]	Q8BL65 2xCarbamidomethyl [C83; C86]	2	2664.29	High	n/a	High		7.935e-06		2.343e-06	4.87
Q8BL65	Actin-binding LIM protein 2 OS=Mus musculus OX=10090 GN=Ablim2 PE=1 SV=1	[K].HYHPSCALCVR.[C]	2xCarbamidomethyl [C6; C9]	1.93156e-05	3.46687e-05	1	5	1	19	Q8BL65 [230-240]	Q8BL65 2xCarbamidomethyl [C235; C238]	0	1399.64	High	n/a	High		7.935e-06		1.459e-06	3.6
Q8BL65	Actin-binding LIM protein 2 OS=Mus musculus OX=10090 GN=Ablim2 PE=1 SV=1	[-].MSAVSQPQAAHAPLEKPASTAILCNTCGNVCKGEVLR.[V]	3xCarbamidomethyl [C24; C27; C31]; 1xMet-loss+Acetyl [N-Term]	2.49973e-05	3.46687e-05	1	5	1	1	Q8BL65 [1-37]	Q8BL65 3xCarbamidomethyl [C24; C27; C31]; 1xMet-loss+Acetyl [N-Term]	1	3876.92	High	n/a	High		0.0002131		0.0001604	5.58
Q8BL65	Actin-binding LIM protein 2 OS=Mus musculus OX=10090 GN=Ablim2 PE=1 SV=1	[-].MSAVSQPQAAHAPLEKPASTAILCNTCGNVCK.[G]	3xCarbamidomethyl [C24; C27; C31]; 1xMet-loss+Acetyl [N-Term]	1.82914e-08	3.46687e-05	1	5	1	1	Q8BL65 [1-32]	Q8BL65 3xCarbamidomethyl [C24; C27; C31]; 1xMet-loss+Acetyl [N-Term]	0	3322.6	High	n/a	High		0.0002131		2.022e-06	6.75
Q8BL65	Actin-binding LIM protein 2 OS=Mus musculus OX=10090 GN=Ablim2 PE=1 SV=1	[K].TYHPDCFVCAVCRLPFPPGDR.[V]	3xCarbamidomethyl [C6; C9; C12]	8.00044e-09	3.46687e-05	1	5	1	13	Q8BL65 [101-121]	Q8BL65 3xCarbamidomethyl [C106; C109; C112]	1	2564.16	High	n/a	High		7.935e-06		3.971e-10	5.31
Q8BL65	Actin-binding LIM protein 2 OS=Mus musculus OX=10090 GN=Ablim2 PE=1 SV=1	[K].TYHPDCFVCAVCR.[L]	3xCarbamidomethyl [C6; C9; C12]	7.79876e-06	3.46687e-05	1	5	1	46	Q8BL65 [101-113]	Q8BL65 3xCarbamidomethyl [C106; C109; C112]	0	1684.7	High	n/a	High		7.935e-06		5.63e-07	3.23
Q69ZX8	Actin-binding LIM protein 3 OS=Mus musculus OX=10090 GN=Ablim3 PE=1 SV=2	[K].HYHPTCAR.[C]	1xCarbamidomethyl [C6]	0.00189388	0.000136771	1	1	1	10	Q69ZX8 [228-235]	Q69ZX8 1xCarbamidomethyl [C233]	0	1041.47	High	n/a	High		2.796e-05		0.0001788	1.88
Q69ZX8	Actin-binding LIM protein 3 OS=Mus musculus OX=10090 GN=Ablim3 PE=1 SV=2	[K].QWHVSCFK.[C]	1xCarbamidomethyl [C6]	0.0113121	0.000424947	1	1	1	2	Q69ZX8 [170-177]	Q69ZX8 1xCarbamidomethyl [C175]	0	1091.51	High	n/a	High		0.0001013		0.001117	2.17
Q69ZX8	Actin-binding LIM protein 3 OS=Mus musculus OX=10090 GN=Ablim3 PE=1 SV=2	[R].GGSNVIQCYR.[C]	1xCarbamidomethyl [C8]	0.000303979	3.46687e-05	1	1	1	4	Q69ZX8 [16-25]	Q69ZX8 1xCarbamidomethyl [C23]	0	1153.54	High	n/a	High		7.935e-06		2.677e-05	1.9
Q69ZX8	Actin-binding LIM protein 3 OS=Mus musculus OX=10090 GN=Ablim3 PE=1 SV=2	[R].GPSHCAGCKEEIK.[H]	2xCarbamidomethyl [C5; C8]	0.000624346	3.46687e-05	1	1	1	1	Q69ZX8 [147-159]	Q69ZX8 2xCarbamidomethyl [C151; C154]	1	1472.66	High	n/a	High		7.935e-06		5.699e-05	2.2
Q69ZX8	Actin-binding LIM protein 3 OS=Mus musculus OX=10090 GN=Ablim3 PE=1 SV=2	[K].CFVCSLCR.[K]	3xCarbamidomethyl [C1; C4; C7]	0.00308426	0.000202726	1	1	1	1	Q69ZX8 [105-112]	Q69ZX8 3xCarbamidomethyl [C105; C108; C111]	0	1101.46	High	n/a	High		4.09e-05		0.0002923	2.61
Q91WC0	Actin-histidine N-methyltransferase OS=Mus musculus OX=10090 GN=Setd3 PE=1 SV=1	[K].CSSPAPSPGK.[E]	1xCarbamidomethyl [C1]	9.74276e-05	3.46687e-05	1	1	1	2	Q91WC0 [36-45]	Q91WC0 1xCarbamidomethyl [C36]	0	987.456	High	n/a	High		7.935e-06		8.087e-06	2.19
Q91WC0	Actin-histidine N-methyltransferase OS=Mus musculus OX=10090 GN=Setd3 PE=1 SV=1	[K].EILNLTSELLQKCSSPAPSPGK.[E]	1xCarbamidomethyl [C13]	8.44534e-07	3.46687e-05	1	1	1	1	Q91WC0 [24-45]	Q91WC0 1xCarbamidomethyl [C36]	1	2369.24	High	n/a	High		7.935e-06		5.376e-08	3.61
Q91WC0	Actin-histidine N-methyltransferase OS=Mus musculus OX=10090 GN=Setd3 PE=1 SV=1	[R].VFCMTEEELK.[E]	1xCarbamidomethyl [C3]	5.86937e-05	3.46687e-05	1	3	1	1	Q91WC0 [387-396]	Q91WC0 1xCarbamidomethyl [C389]	0	1285.58	High	n/a	High		7.935e-06		4.734e-06	1.72
Q99MR0	Actin-like protein 6B OS=Mus musculus OX=10090 GN=Actl6b PE=1 SV=1	[K].SPLAGDFISMQCR.[E]	1xCarbamidomethyl [C12]	1.03618e-06	3.46687e-05	1	1	1	4	Q99MR0 [192-204]	Q99MR0 1xCarbamidomethyl [C203]	0	1481.69	High	n/a	High		7.935e-06		6.674e-08	4.37
Q99MR0	Actin-like protein 6B OS=Mus musculus OX=10090 GN=Actl6b PE=1 SV=1	[K].SPLAGDFISMQCR.[E]	1xCarbamidomethyl [C12]; 1xOxidation [M10]	4.99971e-06	3.46687e-05	1	1	1	3	Q99MR0 [192-204]	Q99MR0 1xCarbamidomethyl [C203]	0	1497.68	High	n/a	High		7.935e-06		3.514e-07	2.3
Q9QZB7	Actin-related protein 10 OS=Mus musculus OX=10090 GN=Actr10 PE=1 SV=2	[K].CGFAGETGPR.[C]	1xCarbamidomethyl [C1]	0.00153065	0.000136771	1	1	1	1	Q9QZB7 [27-36]	Q9QZB7 1xCarbamidomethyl [C27]	0	1051.46	High	n/a	High		2.796e-05		0.0001438	3.02
Q9QZB7	Actin-related protein 10 OS=Mus musculus OX=10090 GN=Actr10 PE=1 SV=2	[R].RVVVIESVLCPSHFR.[E]	1xCarbamidomethyl [C10]	8.52638e-05	3.46687e-05	1	1	1	2	Q9QZB7 [88-102]	Q9QZB7 1xCarbamidomethyl [C97]	1	1797.98	High	n/a	High		7.935e-06		7.007e-06	6.16
Q9QZB7	Actin-related protein 10 OS=Mus musculus OX=10090 GN=Actr10 PE=1 SV=2	[K].ELETQLLEQCTVDTGAAK.[G]	1xCarbamidomethyl [C10]	2.28361e-09	3.46687e-05	1	1	1	4	Q9QZB7 [174-191]	Q9QZB7 1xCarbamidomethyl [C183]	0	2005.97	High	n/a	High		7.935e-06		1.049e-10	4.54
Q9QZB7	Actin-related protein 10 OS=Mus musculus OX=10090 GN=Actr10 PE=1 SV=2	[K].SVATLILDSLLQCPIDTRK.[Q]	1xCarbamidomethyl [C13]	1.06338e-08	3.46687e-05	1	1	1	2	Q9QZB7 [279-297]	Q9QZB7 1xCarbamidomethyl [C291]	1	2143.18	High	n/a	High		7.935e-06		5.332e-10	4.15
Q9QZB7	Actin-related protein 10 OS=Mus musculus OX=10090 GN=Actr10 PE=1 SV=2	[K].SVATLILDSLLQCPIDTR.[K]	1xCarbamidomethyl [C13]	4.60813e-10	3.46687e-05	1	1	1	9	Q9QZB7 [279-296]	Q9QZB7 1xCarbamidomethyl [C291]	0	2015.08	High	n/a	High		7.935e-06		1.943e-11	4.79
Q9QZB7	Actin-related protein 10 OS=Mus musculus OX=10090 GN=Actr10 PE=1 SV=2	[K].TAVVIDLGEAFTKCGFAGETGPR.[C]	1xCarbamidomethyl [C14]	7.44824e-10	3.46687e-05	1	1	1	2	Q9QZB7 [14-36]	Q9QZB7 1xCarbamidomethyl [C27]	1	2396.19	High	n/a	High		7.935e-06		3.225e-11	3.98
Q9QZB7	Actin-related protein 10 OS=Mus musculus OX=10090 GN=Actr10 PE=1 SV=2	[R].TCFVSDLKR.[G]	1xCarbamidomethyl [C2]	0.000522709	3.46687e-05	1	1	1	2	Q9QZB7 [214-222]	Q9QZB7 1xCarbamidomethyl [C215]	1	1125.57	High	n/a	High		7.935e-06		4.721e-05	2.35
Q9QZB7	Actin-related protein 10 OS=Mus musculus OX=10090 GN=Actr10 PE=1 SV=2	[R].TCFVSDLK.[R]	1xCarbamidomethyl [C2]	0.00488834	0.000259952	1	1	1	6	Q9QZB7 [214-221]	Q9QZB7 1xCarbamidomethyl [C215]	0	969.471	High	n/a	High		5.844e-05		0.000467	1.32
Q9QZB7	Actin-related protein 10 OS=Mus musculus OX=10090 GN=Actr10 PE=1 SV=2	[K].VRTCFVSDLK.[R]	1xCarbamidomethyl [C4]	0.00289872	0.000202726	1	1	1	1	Q9QZB7 [212-221]	Q9QZB7 1xCarbamidomethyl [C215]	1	1224.64	High	n/a	High		4.09e-05		0.0002754	2.11
Q9QZB7	Actin-related protein 10 OS=Mus musculus OX=10090 GN=Actr10 PE=1 SV=2	[R].IPDWCSLNNPPLEMMFDVGK.[A]	1xCarbamidomethyl [C5]	4.37041e-09	3.46687e-05	1	1	1	3	Q9QZB7 [384-403]	Q9QZB7 1xCarbamidomethyl [C388]	0	2363.09	High	n/a	High		7.935e-06		2.08e-10	3.75
Q9QZB7	Actin-related protein 10 OS=Mus musculus OX=10090 GN=Actr10 PE=1 SV=2	[R].VVVIESVLCPSHFRETLTR.[V]	1xCarbamidomethyl [C9]	2.52205e-05	3.46687e-05	1	1	1	2	Q9QZB7 [89-107]	Q9QZB7 1xCarbamidomethyl [C97]	1	2242.2	High	n/a	High		7.935e-06		1.934e-06	2.92
Q9QZB7	Actin-related protein 10 OS=Mus musculus OX=10090 GN=Actr10 PE=1 SV=2	[R].VVVIESVLCPSHFR.[E]	1xCarbamidomethyl [C9]	1.40141e-07	3.46687e-05	1	1	1	21	Q9QZB7 [89-102]	Q9QZB7 1xCarbamidomethyl [C97]	0	1641.88	High	n/a	High		7.935e-06		8.119e-09	3.74
P61161	Actin-related protein 2 OS=Mus musculus OX=10090 GN=Actr2 PE=1 SV=1	[K].LCYVGYNIEQEQK.[L]	1xCarbamidomethyl [C2]	7.72973e-06	3.46687e-05	1	1	1	1	P61161 [220-232]	P61161 1xCarbamidomethyl [C221]	0	1643.77	High	n/a	High		7.935e-06		5.574e-07	3.54
P61161	Actin-related protein 2 OS=Mus musculus OX=10090 GN=Actr2 PE=1 SV=1	[K].VVVCDNGTGFVK.[C]	1xCarbamidomethyl [C4]	3.89912e-05	3.46687e-05	1	1	1	11	P61161 [8-19]	P61161 1xCarbamidomethyl [C11]	0	1294.65	High	n/a	High		7.935e-06		3.073e-06	2.85
P61161	Actin-related protein 2 OS=Mus musculus OX=10090 GN=Actr2 PE=1 SV=1	[K].EKLCYVGYNIEQEQK.[L]	1xCarbamidomethyl [C4]	7.06672e-08	3.46687e-05	1	1	1	3	P61161 [218-232]	P61161 1xCarbamidomethyl [C221]	1	1900.91	High	n/a	High		7.935e-06		3.919e-09	4.93
P61161	Actin-related protein 2 OS=Mus musculus OX=10090 GN=Actr2 PE=1 SV=1	[K].LNIDTRNCKILLTEPPMNPTK.[N]	1xCarbamidomethyl [C8]	1.29363e-07	3.46687e-05	1	1	1	9	P61161 [98-118]	P61161 1xCarbamidomethyl [C105]	2	2468.3	High	n/a	High		7.935e-06		7.431e-09	4.04
P61161	Actin-related protein 2 OS=Mus musculus OX=10090 GN=Actr2 PE=1 SV=1	[K].LNIDTRNCK.[I]	1xCarbamidomethyl [C8]	0.000527374	3.46687e-05	1	1	1	3	P61161 [98-106]	P61161 1xCarbamidomethyl [C105]	1	1133.57	High	n/a	High		7.935e-06		4.77e-05	2.41
P61161	Actin-related protein 2 OS=Mus musculus OX=10090 GN=Actr2 PE=1 SV=1	[K].LNIDTRNCKILLTEPPMNPTK.[N]	1xCarbamidomethyl [C8]; 1xOxidation [M17]	2.09012e-08	3.46687e-05	1	1	1	8	P61161 [98-118]	P61161 1xCarbamidomethyl [C105]	2	2484.29	High	n/a	High		7.935e-06		1.089e-09	4.31
Q9R0Q6	Actin-related protein 2/3 complex subunit 1A OS=Mus musculus OX=10090 GN=Arpc1a PE=1 SV=1	[-].MSLHQFLLEPITCHAWNRDR.[T]	1xCarbamidomethyl [C13]; 1xMet-loss+Acetyl [N-Term]	0.00053208	3.46687e-05	1	1	1	1	Q9R0Q6 [1-20]	Q9R0Q6 1xCarbamidomethyl [C13]; 1xMet-loss+Acetyl [N-Term]	1	2435.2	High	n/a	High		0.0002131		0.001018	4.74
Q9R0Q6	Actin-related protein 2/3 complex subunit 1A OS=Mus musculus OX=10090 GN=Arpc1a PE=1 SV=1	[-].MSLHQFLLEPITCHAWNR.[D]	1xCarbamidomethyl [C13]; 1xMet-loss+Acetyl [N-Term]	2.12599e-10	3.46687e-05	1	1	1	10	Q9R0Q6 [1-18]	Q9R0Q6 1xCarbamidomethyl [C13]; 1xMet-loss+Acetyl [N-Term]	0	2164.08	High	n/a	High		0.0002131		1.365e-07	5.77
Q9R0Q6	Actin-related protein 2/3 complex subunit 1A OS=Mus musculus OX=10090 GN=Arpc1a PE=1 SV=1	[K].FCTTGIDGAMTIWDFK.[T]	1xCarbamidomethyl [C2]	2.09173e-06	3.46687e-05	1	1	1	4	Q9R0Q6 [343-358]	Q9R0Q6 1xCarbamidomethyl [C344]	0	1862.85	High	n/a	High		7.935e-06		1.408e-07	2.91
Q9R0Q6	Actin-related protein 2/3 complex subunit 1A OS=Mus musculus OX=10090 GN=Arpc1a PE=1 SV=1	[R].GCLTFVSK.[L]	1xCarbamidomethyl [C2]	0.00740726	0.000314522	1	1	1	15	Q9R0Q6 [278-285]	Q9R0Q6 1xCarbamidomethyl [C279]	0	911.466	High	n/a	High		7.473e-05		0.0007156	1.65
Q9R0Q6	Actin-related protein 2/3 complex subunit 1A OS=Mus musculus OX=10090 GN=Arpc1a PE=1 SV=1	[R].NTALETLHQNSITQVSIYEVDKQDCR.[K]	1xCarbamidomethyl [C25]	1.1023e-07	3.46687e-05	1	1	1	2	Q9R0Q6 [316-341]	Q9R0Q6 1xCarbamidomethyl [C340]	1	3062.48	High	n/a	High		7.935e-06		6.274e-09	5.58
Q9R0Q6	Actin-related protein 2/3 complex subunit 1A OS=Mus musculus OX=10090 GN=Arpc1a PE=1 SV=1	[R].ATTEDRNTALETLHQNSITQVSIYEVDKQDCR.[K]	1xCarbamidomethyl [C31]	2.304e-09	3.46687e-05	1	1	1	1	Q9R0Q6 [310-341]	Q9R0Q6 1xCarbamidomethyl [C340]	2	3735.79	High	n/a	High		0.0002131		5.776e-07	9.45
Q9R0Q6	Actin-related protein 2/3 complex subunit 1A OS=Mus musculus OX=10090 GN=Arpc1a PE=1 SV=1	[R].IVTCGADR.[N]	1xCarbamidomethyl [C4]	0.00413155	0.000259952	1	1	1	23	Q9R0Q6 [67-74]	Q9R0Q6 1xCarbamidomethyl [C70]	0	891.435	High	n/a	High		5.247e-05		0.0003948	1.23
Q9R0Q6	Actin-related protein 2/3 complex subunit 1A OS=Mus musculus OX=10090 GN=Arpc1a PE=1 SV=1	[R].LISVCYFESENDWWVSK.[H]	1xCarbamidomethyl [C5]	6.13194e-07	3.46687e-05	1	1	1	3	Q9R0Q6 [119-135]	Q9R0Q6 1xCarbamidomethyl [C123]	0	2161.99	High	n/a	High		7.935e-06		3.856e-08	3.92
Q9R0Q6	Actin-related protein 2/3 complex subunit 1A OS=Mus musculus OX=10090 GN=Arpc1a PE=1 SV=1	[K].SDRIVTCGADRNAYVWSQK.[D]	1xCarbamidomethyl [C7]	3.7952e-06	3.46687e-05	1	1	1	2	Q9R0Q6 [64-82]	Q9R0Q6 1xCarbamidomethyl [C70]	2	2226.07	High	n/a	High		7.935e-06		2.632e-07	5.47
Q9R0Q6	Actin-related protein 2/3 complex subunit 1A OS=Mus musculus OX=10090 GN=Arpc1a PE=1 SV=1	[K].SDRIVTCGADR.[N]	1xCarbamidomethyl [C7]	7.52849e-05	3.46687e-05	1	1	1	3	Q9R0Q6 [64-74]	Q9R0Q6 1xCarbamidomethyl [C70]	1	1249.6	High	n/a	High		7.935e-06		6.131e-06	3.4
Q9R0Q6; Q9WV32	Actin-related protein 2/3 complex subunit 1A OS=Mus musculus OX=10090 GN=Arpc1a PE=1 SV=1 Actin-related protein 2/3 complex subunit 1B OS=Mus musculus OX=10090 GN=Arpc1b PE=1 SV=4	[R].STVLSLDWHPNNVLLAAGSCDFK.[C]	1xCarbamidomethyl [C20]	6.45556e-12	3.46687e-05	2	2	1	4	Q9R0Q6 [143-165]; Q9WV32 [143-165]	Q9R0Q6 1xCarbamidomethyl [C162]; Q9WV32 1xCarbamidomethyl [C162]	0	2544.26	High	n/a	High		7.935e-06		2.152e-13	6.42
Q9WV32	Actin-related protein 2/3 complex subunit 1B OS=Mus musculus OX=10090 GN=Arpc1b PE=1 SV=4	[-].MAYHSFLVEPISCHAWNK.[D]	1xCarbamidomethyl [C13]; 1xMet-loss+Acetyl [N-Term]	0.000149283	3.46687e-05	1	1	1	1	Q9WV32 [1-18]	Q9WV32 1xCarbamidomethyl [C13]; 1xMet-loss+Acetyl [N-Term]	0	2101	High	n/a	High		0.0002131		0.0004713	4.92
Q9WV32	Actin-related protein 2/3 complex subunit 1B OS=Mus musculus OX=10090 GN=Arpc1b PE=1 SV=4	[R].IVTCGTDR.[N]	1xCarbamidomethyl [C4]	0.0222174	0.000779279	1	1	1	3	Q9WV32 [67-74]	Q9WV32 1xCarbamidomethyl [C70]	0	921.446	High	n/a	High		0.0002193		0.002294	1.26
Q9CVB6	Actin-related protein 2/3 complex subunit 2 OS=Mus musculus OX=10090 GN=Arpc2 PE=1 SV=3	[K].DSIVHQAGMLKRNCFASVFEK.[Y]	1xCarbamidomethyl [C14]	8.29648e-07	3.46687e-05	1	1	1	3	Q9CVB6 [107-127]	Q9CVB6 1xCarbamidomethyl [C120]	2	2437.21	High	n/a	High		7.935e-06		5.288e-08	7.63
Q9CVB6	Actin-related protein 2/3 complex subunit 2 OS=Mus musculus OX=10090 GN=Arpc2 PE=1 SV=3	[K].DSIVHQAGMLKRNCFASVFEK.[Y]	1xCarbamidomethyl [C14]; 1xOxidation [M9]	7.1374e-05	3.46687e-05	1	1	1	2	Q9CVB6 [107-127]	Q9CVB6 1xCarbamidomethyl [C120]	2	2453.21	High	n/a	High		7.935e-06		5.79e-06	2.18
Q9CVB6	Actin-related protein 2/3 complex subunit 2 OS=Mus musculus OX=10090 GN=Arpc2 PE=1 SV=3	[R].NCFASVFEK.[Y]	1xCarbamidomethyl [C2]	0.000508961	3.46687e-05	1	1	1	22	Q9CVB6 [119-127]	Q9CVB6 1xCarbamidomethyl [C120]	0	1101.5	High	n/a	High		7.935e-06		4.584e-05	2.53
Q9CVB6	Actin-related protein 2/3 complex subunit 2 OS=Mus musculus OX=10090 GN=Arpc2 PE=1 SV=3	[K].RNCFASVFEK.[Y]	1xCarbamidomethyl [C3]	0.207197	0.007548	1	1	1	2	Q9CVB6 [118-127]	Q9CVB6 1xCarbamidomethyl [C120]	1	1257.6	High	n/a	High		0.001857		0.04134	3.04
Q9JM76	Actin-related protein 2/3 complex subunit 3 OS=Mus musculus OX=10090 GN=Arpc3 PE=1 SV=3	[K].VFDPQSDKPSKWWTCFVKR.[Q]	1xCarbamidomethyl [C15]	0.000527374	3.46687e-05	1	1	1	2	Q9JM76 [148-166]	Q9JM76 1xCarbamidomethyl [C162]	2	2411.2	High	n/a	High		7.935e-06		4.768e-05	2.05
Q9JM76	Actin-related protein 2/3 complex subunit 3 OS=Mus musculus OX=10090 GN=Arpc3 PE=1 SV=3	[K].VFDPQSDKPSKWWTCFVK.[R]	1xCarbamidomethyl [C15]	1.81225e-09	3.46687e-05	1	1	1	6	Q9JM76 [148-165]	Q9JM76 1xCarbamidomethyl [C162]	1	2255.1	High	n/a	High		7.935e-06		8.284e-11	4.45
Q9JM76	Actin-related protein 2/3 complex subunit 3 OS=Mus musculus OX=10090 GN=Arpc3 PE=1 SV=3	[K].WWTCFVK.[R]	1xCarbamidomethyl [C4]	0.0442875	0.00129736	1	1	1	6	Q9JM76 [159-165]	Q9JM76 1xCarbamidomethyl [C162]	0	1026.49	High	n/a	High		0.0003719		0.00503	1.96
Q9JM76	Actin-related protein 2/3 complex subunit 3 OS=Mus musculus OX=10090 GN=Arpc3 PE=1 SV=3	[R].QETGLRLCEK.[V]	1xCarbamidomethyl [C8]	2.88189e-05	3.46687e-05	1	1	1	2	Q9JM76 [138-147]	Q9JM76 1xCarbamidomethyl [C145]	1	1233.63	High	n/a	High		7.935e-06		2.23e-06	4.11
Q9JM76	Actin-related protein 2/3 complex subunit 3 OS=Mus musculus OX=10090 GN=Arpc3 PE=1 SV=3	[R].QETGLRLCEKVFDPQSDKPSK.[W]	1xCarbamidomethyl [C8]	0.000807776	7.02174e-05	1	1	1	1	Q9JM76 [138-158]	Q9JM76 1xCarbamidomethyl [C145]	2	2462.23	High	n/a	High		1.496e-05		7.38e-05	3.41
P59999	Actin-related protein 2/3 complex subunit 4 OS=Mus musculus OX=10090 GN=Arpc4 PE=1 SV=3	[K].ILCHKFMR.[F]	1xCarbamidomethyl [C3]	0.250149	0.00937161	1	1	1	1	P59999 [85-92]	P59999 1xCarbamidomethyl [C87]	1	1104.58	High	n/a	High		0.002262		0.05571	1.78
P59999	Actin-related protein 2/3 complex subunit 4 OS=Mus musculus OX=10090 GN=Arpc4 PE=1 SV=3	[R].ATLQAALCLENFSSQVVER.[H]	1xCarbamidomethyl [C8]	7.85338e-11	3.46687e-05	1	1	1	44	P59999 [14-32]	P59999 1xCarbamidomethyl [C21]	0	2136.08	High	n/a	High		7.935e-06		2.997e-12	5.32
Q9CPW4	Actin-related protein 2/3 complex subunit 5 OS=Mus musculus OX=10090 GN=Arpc5 PE=1 SV=3	[K].FVDEEDGGDGQAGPDEGEVDSCLR.[Q]	1xCarbamidomethyl [C22]	6.87278e-11	3.46687e-05	1	1	1	2	Q9CPW4 [24-47]	Q9CPW4 1xCarbamidomethyl [C45]	0	2553.03	High	n/a	High		7.935e-06		2.618e-12	3.01
Q9D898	Actin-related protein 2/3 complex subunit 5-like protein OS=Mus musculus OX=10090 GN=Arpc5l PE=1 SV=1	[K].FVDEHEEAAAAAGEPGPDPCEVDGLLR.[Q]	1xCarbamidomethyl [C20]	3.46832e-09	3.46687e-05	1	1	1	2	Q9D898 [23-49]	Q9D898 1xCarbamidomethyl [C42]	0	2851.28	High	n/a	High		7.935e-06		1.635e-10	6.51
Q99JY9	Actin-related protein 3 OS=Mus musculus OX=10090 GN=Actr3 PE=1 SV=3	[K].DYEEIGPSICR.[H]	1xCarbamidomethyl [C10]	0.000157461	3.46687e-05	1	1	1	9	Q99JY9 [399-409]	Q99JY9 1xCarbamidomethyl [C408]	0	1338.6	High	n/a	High		7.935e-06		1.336e-05	3.09
Q99JY9	Actin-related protein 3 OS=Mus musculus OX=10090 GN=Actr3 PE=1 SV=3	[K].DYEEIGPSICRHNPVFGVMS.[-]	1xCarbamidomethyl [C10]	0.00311171	0.000236619	1	1	1	1	Q99JY9 [399-418]	Q99JY9 1xCarbamidomethyl [C408]	1	2307.05	High	n/a	High		4.76e-05		0.0002954	2.97
Q99JY9	Actin-related protein 3 OS=Mus musculus OX=10090 GN=Actr3 PE=1 SV=3	[K].KDYEEIGPSICR.[H]	1xCarbamidomethyl [C11]	1.38953e-06	3.46687e-05	1	1	1	7	Q99JY9 [398-409]	Q99JY9 1xCarbamidomethyl [C408]	1	1466.69	High	n/a	High		7.935e-06		9.16e-08	4.58
Q99JY9	Actin-related protein 3 OS=Mus musculus OX=10090 GN=Actr3 PE=1 SV=3	[K].LGYAGNTEPQFIIPSCIAIKESAK.[V]	1xCarbamidomethyl [C16]	7.32258e-08	3.46687e-05	1	1	1	1	Q99JY9 [19-42]	Q99JY9 1xCarbamidomethyl [C34]	1	2607.35	High	n/a	High		7.935e-06		4.07e-09	5.49
Q99JY9	Actin-related protein 3 OS=Mus musculus OX=10090 GN=Actr3 PE=1 SV=3	[K].LGYAGNTEPQFIIPSCIAIK.[E]	1xCarbamidomethyl [C16]	2.38834e-08	3.46687e-05	1	1	1	14	Q99JY9 [19-38]	Q99JY9 1xCarbamidomethyl [C34]	0	2192.14	High	n/a	High		7.935e-06		1.256e-09	4.42
Q99JY9	Actin-related protein 3 OS=Mus musculus OX=10090 GN=Actr3 PE=1 SV=3	[R].TLTGTVIDSGDGVTHVIPVAEGYVIGSCIKHIPIAGR.[D]	1xCarbamidomethyl [C28]	7.79583e-07	3.46687e-05	1	1	1	2	Q99JY9 [162-198]	Q99JY9 1xCarbamidomethyl [C189]	1	3803.02	High	n/a	High		0.0002131		1.962e-05	5.72
Q99JY9	Actin-related protein 3 OS=Mus musculus OX=10090 GN=Actr3 PE=1 SV=3	[R].TLTGTVIDSGDGVTHVIPVAEGYVIGSCIK.[H]	1xCarbamidomethyl [C28]	8.2933e-08	3.46687e-05	1	1	1	5	Q99JY9 [162-191]	Q99JY9 1xCarbamidomethyl [C189]	0	3058.58	High	n/a	High		7.935e-06		4.655e-09	4.75
Q99JY9	Actin-related protein 3 OS=Mus musculus OX=10090 GN=Actr3 PE=1 SV=3	[R].YSYVCPDLVK.[E]	1xCarbamidomethyl [C5]	9.31915e-05	3.46687e-05	1	1	1	9	Q99JY9 [231-240]	Q99JY9 1xCarbamidomethyl [C235]	0	1243.6	High	n/a	High		7.935e-06		7.737e-06	1.93
Q99JY9	Actin-related protein 3 OS=Mus musculus OX=10090 GN=Actr3 PE=1 SV=3	[K].ERYSYVCPDLVK.[E]	1xCarbamidomethyl [C7]	0.000652702	3.46687e-05	1	1	1	1	Q99JY9 [229-240]	Q99JY9 1xCarbamidomethyl [C235]	1	1528.75	High	n/a	High		7.935e-06		5.945e-05	2.81
Q99JY9	Actin-related protein 3 OS=Mus musculus OX=10090 GN=Actr3 PE=1 SV=3	[R].LPACVVDCGTGYTK.[L]	2xCarbamidomethyl [C4; C8]	6.23717e-09	3.46687e-05	1	1	1	6	Q99JY9 [5-18]	Q99JY9 2xCarbamidomethyl [C8; C12]	0	1540.71	High	n/a	High		7.935e-06		3.034e-10	3.9
Q99JY9	Actin-related protein 3 OS=Mus musculus OX=10090 GN=Actr3 PE=1 SV=3	[-].MAGRLPACVVDCGTGYTK.[L]	2xCarbamidomethyl [C8; C12]; 1xMet-loss+Acetyl [N-Term]	3.37702e-09	3.46687e-05	1	1	1	5	Q99JY9 [1-18]	Q99JY9 2xCarbamidomethyl [C8; C12]; 1xMet-loss+Acetyl [N-Term]	1	1866.88	High	n/a	High		0.0002131		7.273e-07	5.6
Q641P0	Actin-related protein 3B OS=Mus musculus OX=10090 GN=Actr3b PE=1 SV=1	[K].DYEEYGPSICR.[H]	1xCarbamidomethyl [C10]	5.13654e-05	3.46687e-05	1	2	1	4	Q641P0 [399-409]	Q641P0 1xCarbamidomethyl [C408]	0	1388.58	High	n/a	High		7.935e-06		4.1e-06	3.3
Q641P0	Actin-related protein 3B OS=Mus musculus OX=10090 GN=Actr3b PE=1 SV=1	[K].KDYEEYGPSICR.[H]	1xCarbamidomethyl [C11]	1.83054e-06	3.46687e-05	1	2	1	1	Q641P0 [398-409]	Q641P0 1xCarbamidomethyl [C408]	1	1516.67	High	n/a	High		7.935e-06		1.219e-07	3.72
Q641P0	Actin-related protein 3B OS=Mus musculus OX=10090 GN=Actr3b PE=1 SV=1	[K].LGYAGNTEPQFIIPSCIAIRESAK.[V]	1xCarbamidomethyl [C16]	1.24937e-05	3.46687e-05	1	1	1	2	Q641P0 [19-42]	Q641P0 1xCarbamidomethyl [C34]	1	2635.35	High	n/a	High		7.935e-06		9.273e-07	3.19
Q641P0	Actin-related protein 3B OS=Mus musculus OX=10090 GN=Actr3b PE=1 SV=1	[K].LGYAGNTEPQFIIPSCIAIR.[E]	1xCarbamidomethyl [C16]	2.75349e-08	3.46687e-05	1	1	1	6	Q641P0 [19-38]	Q641P0 1xCarbamidomethyl [C34]	0	2220.15	High	n/a	High		7.935e-06		1.458e-09	3.49
Q641P0	Actin-related protein 3B OS=Mus musculus OX=10090 GN=Actr3b PE=1 SV=1	[R].TLTGIVIDSGDGVTHVIPVAEGYVIGSCIKHIPIAGR.[D]	1xCarbamidomethyl [C28]	8.52077e-07	3.46687e-05	1	2	1	2	Q641P0 [162-198]	Q641P0 1xCarbamidomethyl [C189]	1	3815.05	High	n/a	High		0.0002131		2.068e-05	7.9
Q641P0	Actin-related protein 3B OS=Mus musculus OX=10090 GN=Actr3b PE=1 SV=1	[R].TLTGIVIDSGDGVTHVIPVAEGYVIGSCIK.[H]	1xCarbamidomethyl [C28]	1.17174e-10	3.46687e-05	1	2	1	2	Q641P0 [162-191]	Q641P0 1xCarbamidomethyl [C189]	0	3070.61	High	n/a	High		7.935e-06		4.589e-12	6.54
Q641P0	Actin-related protein 3B OS=Mus musculus OX=10090 GN=Actr3b PE=1 SV=1	[K].YCYICPDIVR.[E]	2xCarbamidomethyl [C2; C5]	0.000164618	3.46687e-05	1	2	1	10	Q641P0 [231-240]	Q641P0 2xCarbamidomethyl [C232; C235]	0	1358.62	High	n/a	High		7.935e-06		1.408e-05	3.02
Q641P0	Actin-related protein 3B OS=Mus musculus OX=10090 GN=Actr3b PE=1 SV=1	[K].EKYCYICPDIVR.[E]	2xCarbamidomethyl [C4; C7]	0.000179922	3.46687e-05	1	2	1	3	Q641P0 [229-240]	Q641P0 2xCarbamidomethyl [C232; C235]	1	1615.76	High	n/a	High		7.935e-06		1.533e-05	3.6
Q641P0	Actin-related protein 3B OS=Mus musculus OX=10090 GN=Actr3b PE=1 SV=1	[-].MAGSLPPCVVDCGTGYTK.[L]	2xCarbamidomethyl [C8; C12]; 1xMet-loss+Acetyl [N-Term]	5.18073e-06	3.46687e-05	1	1	1	3	Q641P0 [1-18]	Q641P0 2xCarbamidomethyl [C8; C12]; 1xMet-loss+Acetyl [N-Term]	0	1823.83	High	n/a	High		0.0002131		6.189e-05	3.08
Q80US4	Actin-related protein 5 OS=Mus musculus OX=10090 GN=Actr5 PE=1 SV=3	[R].AGWACPGPDPGPEPR.[L]	1xCarbamidomethyl [C5]	0.045819	0.00140311	1	2	1	1	Q80US4 [44-58]	Q80US4 1xCarbamidomethyl [C48]	0	1563.7	High	n/a	High		0.0003969		0.005275	1.1
O54967	Activated CDC42 kinase 1 OS=Mus musculus OX=10090 GN=Tnk2 PE=1 SV=2	[R].HCWGFPDR.[I]	1xCarbamidomethyl [C2]	0.0131373	0.000480989	1	3	1	2	O54967 [474-481]	O54967 1xCarbamidomethyl [C475]	0	1074.46	High	n/a	High		0.0001237		0.001306	2.99
O54967	Activated CDC42 kinase 1 OS=Mus musculus OX=10090 GN=Tnk2 PE=1 SV=2	[R].TLCVGPFPR.[N]	1xCarbamidomethyl [C3]	0.00471831	0.000259952	1	3	1	4	O54967 [432-440]	O54967 1xCarbamidomethyl [C434]	0	1046.55	High	n/a	High		5.844e-05		0.0004504	1.92
O54967	Activated CDC42 kinase 1 OS=Mus musculus OX=10090 GN=Tnk2 PE=1 SV=2	[R].AGPCILPIVR.[D]	1xCarbamidomethyl [C4]	0.000982049	7.02174e-05	1	3	1	6	O54967 [855-864]	O54967 1xCarbamidomethyl [C858]	0	1095.63	High	n/a	High		1.496e-05		9.036e-05	2.58
O54967	Activated CDC42 kinase 1 OS=Mus musculus OX=10090 GN=Tnk2 PE=1 SV=2	[K].VPFAWCAPESLK.[T]	1xCarbamidomethyl [C6]	4.29975e-05	3.46687e-05	1	3	1	1	O54967 [292-303]	O54967 1xCarbamidomethyl [C297]	0	1404.7	High	n/a	High		7.935e-06		3.41e-06	1.81
A2AH22	Activating molecule in BECN1-regulated autophagy protein 1 OS=Mus musculus OX=10090 GN=Ambra1 PE=1 SV=1	[R].HELQCDLR.[R]	1xCarbamidomethyl [C5]	0.00272432	0.000202726	1	7	1	2	A2AH22 [498-505]	A2AH22 1xCarbamidomethyl [C502]	0	1070.5	High	n/a	High		4.09e-05		0.0002582	1.15
Q91WR3	Activating signal cointegrator 1 complex subunit 2 OS=Mus musculus OX=10090 GN=Ascc2 PE=1 SV=1	[K].ILDLCVLFGK.[G]	1xCarbamidomethyl [C5]	2.01937e-05	3.46687e-05	1	3	1	2	Q91WR3 [161-170]	Q91WR3 1xCarbamidomethyl [C165]	0	1177.66	High	n/a	High		7.935e-06		1.534e-06	1.25
E9PZJ8	Activating signal cointegrator 1 complex subunit 3 OS=Mus musculus OX=10090 GN=Ascc3 PE=1 SV=1	[R].HPPHTELLDLQPLPITALGCK.[A]	1xCarbamidomethyl [C20]	7.00685e-07	3.46687e-05	1	2	1	2	E9PZJ8 [1297-1317]	E9PZJ8 1xCarbamidomethyl [C1316]	0	2350.26	High	n/a	High		7.935e-06		4.439e-08	3.09
E9PZJ8	Activating signal cointegrator 1 complex subunit 3 OS=Mus musculus OX=10090 GN=Ascc3 PE=1 SV=1	[R].LKPECSTEELLSILSDAEEYTDLPVR.[H]	1xCarbamidomethyl [C5]	7.65842e-07	3.46687e-05	1	2	1	1	E9PZJ8 [1837-1862]	E9PZJ8 1xCarbamidomethyl [C1841]	0	3007.48	High	n/a	High		7.935e-06		4.864e-08	3.22
Q9QXN3	Activating signal cointegrator 1 OS=Mus musculus OX=10090 GN=Trip4 PE=1 SV=2	[R].HPCDCLGQK.[H]	2xCarbamidomethyl [C3; C5]	8.60253e-05	3.46687e-05	1	2	1	2	Q9QXN3 [169-177]	Q9QXN3 2xCarbamidomethyl [C171; C173]	0	1114.48	High	n/a	High		7.935e-06		7.08e-06	3.36
Q9QXN3	Activating signal cointegrator 1 OS=Mus musculus OX=10090 GN=Trip4 PE=1 SV=2	[K].LINNCLVCGR.[I]	2xCarbamidomethyl [C5; C8]	0.000874987	7.02174e-05	1	2	1	2	Q9QXN3 [180-189]	Q9QXN3 2xCarbamidomethyl [C184; C187]	0	1218.61	High	n/a	High		1.496e-05		8.065e-05	3.05
Q7TT18	Activating transcription factor 7-interacting protein 1 OS=Mus musculus OX=10090 GN=Atf7ip PE=1 SV=1	[K].ALPLPMACTLTQFVSGSK.[Y]	1xCarbamidomethyl [C8]	6.23957e-08	3.46687e-05	1	2	1	2	Q7TT18 [1257-1274]	Q7TT18 1xCarbamidomethyl [C1264]	0	1920.99	High	n/a	High		7.935e-06		3.448e-09	1.58
Q8BK64	Activator of 90 kDa heat shock protein ATPase homolog 1 OS=Mus musculus OX=10090 GN=Ahsa1 PE=1 SV=2	[K].CEVTEVNK.[L]	1xCarbamidomethyl [C1]	0.00181171	0.000136771	1	1	1	4	Q8BK64 [56-63]	Q8BK64 1xCarbamidomethyl [C56]	0	978.456	High	n/a	High		2.796e-05		0.0001709	2.29
Q8BK64	Activator of 90 kDa heat shock protein ATPase homolog 1 OS=Mus musculus OX=10090 GN=Ahsa1 PE=1 SV=2	[K].IPTCKITLK.[E]	1xCarbamidomethyl [C4]	0.000551329	3.46687e-05	1	1	1	5	Q8BK64 [204-212]	Q8BK64 1xCarbamidomethyl [C207]	1	1073.64	High	n/a	High		7.935e-06		4.997e-05	1.74
Q8BK64	Activator of 90 kDa heat shock protein ATPase homolog 1 OS=Mus musculus OX=10090 GN=Ahsa1 PE=1 SV=2	[R].VENEEGKCEVTEVNK.[L]	1xCarbamidomethyl [C8]	7.07209e-06	3.46687e-05	1	1	1	3	Q8BK64 [49-63]	Q8BK64 1xCarbamidomethyl [C56]	1	1763.81	High	n/a	High		7.935e-06		5.06e-07	2.81
Q5SSL4	Active breakpoint cluster region-related protein OS=Mus musculus OX=10090 GN=Abr PE=1 SV=1	[K].CSQSNNQFQK.[I]	1xCarbamidomethyl [C1]	3.178e-05	3.46687e-05	1	3	1	1	Q5SSL4 [201-210]	Q5SSL4 1xCarbamidomethyl [C201]	0	1240.54	High	n/a	High		7.935e-06		2.486e-06	3.31
Q5SSL4	Active breakpoint cluster region-related protein OS=Mus musculus OX=10090 GN=Abr PE=1 SV=1	[R].HVFLFTDVLLCAK.[L]	1xCarbamidomethyl [C11]	6.64028e-08	3.46687e-05	1	4	1	2	Q5SSL4 [320-332]	Q5SSL4 1xCarbamidomethyl [C330]	0	1562.84	High	n/a	High		7.935e-06		3.698e-09	4.78
Q5SSL4	Active breakpoint cluster region-related protein OS=Mus musculus OX=10090 GN=Abr PE=1 SV=1	[K].ENCMMHLLR.[S]	1xCarbamidomethyl [C3]	0.000576372	3.46687e-05	1	4	1	3	Q5SSL4 [754-762]	Q5SSL4 1xCarbamidomethyl [C756]	0	1203.54	High	n/a	High		7.935e-06		5.233e-05	2.93
Q5SSL4	Active breakpoint cluster region-related protein OS=Mus musculus OX=10090 GN=Abr PE=1 SV=1	[K].ENCMMHLLR.[S]	1xCarbamidomethyl [C3]; 1xOxidation [M]	0.00192778	0.000136771	1	4	2	2	Q5SSL4 [754-762]	Q5SSL4 1xCarbamidomethyl [C756]	0	1219.54	High	n/a	High		2.796e-05		0.0001814	1.5
Q5SSL4	Active breakpoint cluster region-related protein OS=Mus musculus OX=10090 GN=Abr PE=1 SV=1	[K].EFYDNLCPK.[V]	1xCarbamidomethyl [C7]	0.000822252	7.02174e-05	1	3	1	8	Q5SSL4 [152-160]	Q5SSL4 1xCarbamidomethyl [C158]	0	1185.52	High	n/a	High		1.496e-05		7.55e-05	1.61
Q5SSL4	Active breakpoint cluster region-related protein OS=Mus musculus OX=10090 GN=Abr PE=1 SV=1	[K].VALETAEKCSQSNNQFQK.[I]	1xCarbamidomethyl [C9]	1.79621e-09	3.46687e-05	1	3	1	3	Q5SSL4 [193-210]	Q5SSL4 1xCarbamidomethyl [C201]	1	2081.99	High	n/a	High		7.935e-06		8.155e-11	3.22
P37172	Activin receptor type-1 OS=Mus musculus OX=10090 GN=Acvr1 PE=2 SV=2	[R].TVARQITLLECVGKGR.[Y]	1xCarbamidomethyl [C11]	0.00047827	3.46687e-05	1	1	1	1	P37172 [203-218]	P37172 1xCarbamidomethyl [C213]	2	1801.01	High	n/a	High		7.935e-06		4.284e-05	2.99
P37172	Activin receptor type-1 OS=Mus musculus OX=10090 GN=Acvr1 PE=2 SV=2	[K].GCFQVYEQGK.[M]	1xCarbamidomethyl [C2]	2.24675e-05	3.46687e-05	1	1	1	1	P37172 [69-78]	P37172 1xCarbamidomethyl [C70]	0	1215.55	High	n/a	High		7.935e-06		1.715e-06	1.56
P37172	Activin receptor type-1 OS=Mus musculus OX=10090 GN=Acvr1 PE=2 SV=2	[K].ECWYQNPSAR.[L]	1xCarbamidomethyl [C2]	0.156676	0.0051446	1	1	1	1	P37172 [476-485]	P37172 1xCarbamidomethyl [C477]	0	1310.56	High	n/a	High		0.001286		0.02711	1
P37172	Activin receptor type-1 OS=Mus musculus OX=10090 GN=Acvr1 PE=2 SV=2	[K].VVCVDQQRPNIPNR.[W]	1xCarbamidomethyl [C3]	2.05486e-06	3.46687e-05	1	1	1	12	P37172 [447-460]	P37172 1xCarbamidomethyl [C449]	0	1694.88	High	n/a	High		7.935e-06		1.381e-07	1.92
P37172	Activin receptor type-1 OS=Mus musculus OX=10090 GN=Acvr1 PE=2 SV=2	[R].KVVCVDQQRPNIPNR.[W]	1xCarbamidomethyl [C4]	1.12293e-05	3.46687e-05	1	1	1	3	P37172 [446-460]	P37172 1xCarbamidomethyl [C449]	1	1822.97	High	n/a	High		7.935e-06		8.281e-07	3.21
P37172	Activin receptor type-1 OS=Mus musculus OX=10090 GN=Acvr1 PE=2 SV=2	[R].QITLLECVGK.[G]	1xCarbamidomethyl [C7]	0.000786539	7.02174e-05	1	1	1	1	P37172 [207-216]	P37172 1xCarbamidomethyl [C213]	0	1160.63	High	n/a	High		1.496e-05		7.2e-05	3.22
Q61271	Activin receptor type-1B OS=Mus musculus OX=10090 GN=Acvr1b PE=1 SV=1	[K].VELVPAGKPFYCLSSEDLR.[N]	1xCarbamidomethyl [C12]	4.49521e-05	3.46687e-05	1	1	1	1	Q61271 [73-91]	Q61271 1xCarbamidomethyl [C84]	0	2180.11	High	n/a	High		7.935e-06		3.568e-06	4.4
Q61271	Activin receptor type-1B OS=Mus musculus OX=10090 GN=Acvr1b PE=1 SV=1	[R].NTHCCYIDFCNK.[I]	3xCarbamidomethyl [C4; C5; C10]	1.75027e-07	3.46687e-05	1	1	1	2	Q61271 [92-103]	Q61271 3xCarbamidomethyl [C95; C96; C101]	0	1631.64	High	n/a	High		7.935e-06		1.029e-08	4.11
Q8K348	Activin receptor type-1C OS=Mus musculus OX=10090 GN=Acvr1c PE=2 SV=3	[K].LRPNLPNQWQSCEALR.[V]	1xCarbamidomethyl [C12]	9.73651e-07	3.46687e-05	1	1	1	1	Q8K348 [440-455]	Q8K348 1xCarbamidomethyl [C451]	0	1982	High	n/a	High		7.935e-06		6.291e-08	3.64
P27038	Activin receptor type-2A OS=Mus musculus OX=10090 GN=Acvr2a PE=1 SV=1	[K].ANVVSWNELCHIAETMAR.[G]	1xCarbamidomethyl [C10]	6.94954e-05	3.46687e-05	1	1	1	1	P27038 [281-298]	P27038 1xCarbamidomethyl [C290]	0	2101	High	n/a	High		7.935e-06		5.671e-06	2.8
P27038	Activin receptor type-2A OS=Mus musculus OX=10090 GN=Acvr2a PE=1 SV=1	[K].ANVVSWNELCHIAETMAR.[G]	1xCarbamidomethyl [C10]; 1xOxidation [M16]	6.30009e-06	3.46687e-05	1	1	1	1	P27038 [281-298]	P27038 1xCarbamidomethyl [C290]	0	2116.99	High	n/a	High		7.935e-06		4.487e-07	2.68
P27038	Activin receptor type-2A OS=Mus musculus OX=10090 GN=Acvr2a PE=1 SV=1	[R].HCFATWK.[N]	1xCarbamidomethyl [C2]	0.00192778	0.000136771	1	1	1	1	P27038 [59-65]	P27038 1xCarbamidomethyl [C60]	0	949.435	High	n/a	High		2.796e-05		0.0001816	2.12
P27038	Activin receptor type-2A OS=Mus musculus OX=10090 GN=Acvr2a PE=1 SV=1	[K].NNLTACIADFGLALK.[F]	1xCarbamidomethyl [C6]	9.14546e-08	3.46687e-05	1	1	1	1	P27038 [332-346]	P27038 1xCarbamidomethyl [C337]	0	1620.84	High	n/a	High		7.935e-06		5.171e-09	3.19
Q8CHC8	Activity-dependent neuroprotector homeobox protein 2 OS=Mus musculus OX=10090 GN=Adnp2 PE=2 SV=2	[K].LAACAPFLK.[W]	1xCarbamidomethyl [C4]	0.0123529	0.000454522	1	1	1	1	Q8CHC8 [762-770]	Q8CHC8 1xCarbamidomethyl [C765]	0	990.544	High	n/a	High		0.0001129		0.00123	2.64
Q9Z103	Activity-dependent neuroprotector homeobox protein OS=Mus musculus OX=10090 GN=Adnp PE=1 SV=2	[K].ILSDIGLEYCK.[E]	1xCarbamidomethyl [C10]	5.2287e-05	3.46687e-05	1	1	1	1	Q9Z103 [22-32]	Q9Z103 1xCarbamidomethyl [C31]	0	1310.67	High	n/a	High		7.935e-06		4.172e-06	2.74
Q9Z103	Activity-dependent neuroprotector homeobox protein OS=Mus musculus OX=10090 GN=Adnp PE=1 SV=2	[K].ILSDIGLEYCKEHIEDFK.[Q]	1xCarbamidomethyl [C10]	0.00170262	0.000136771	1	1	1	1	Q9Z103 [22-39]	Q9Z103 1xCarbamidomethyl [C31]	1	2209.08	High	n/a	High		2.796e-05		0.0001601	2.17
Q9Z103	Activity-dependent neuroprotector homeobox protein OS=Mus musculus OX=10090 GN=Adnp PE=1 SV=2	[R].YLPTDTLLNHMLIHGLSCPYCR.[S]	2xCarbamidomethyl [C18; C21]; 1xOxidation [M11]	0.122052	0.00408226	1	1	1	1	Q9Z103 [496-517]	Q9Z103 2xCarbamidomethyl [C513; C516]	0	2690.29	High	n/a	High		0.001024		0.01895	1.36
Q9Z103	Activity-dependent neuroprotector homeobox protein OS=Mus musculus OX=10090 GN=Adnp PE=1 SV=2	[R].ILLNCPYCTFNADK.[K]	2xCarbamidomethyl [C5; C8]	5.66249e-06	3.46687e-05	1	1	1	1	Q9Z103 [105-118]	Q9Z103 2xCarbamidomethyl [C109; C112]	0	1728.81	High	n/a	High		7.935e-06		4.018e-07	3.22
Q9WV31	Activity-regulated cytoskeleton-associated protein OS=Mus musculus OX=10090 GN=Arc PE=1 SV=1	[K].SIKACLCRCQETIANLER.[W]	3xCarbamidomethyl [C5; C7; C9]	1.13253e-06	3.46687e-05	1	1	1	1	Q9WV31 [90-107]	Q9WV31 3xCarbamidomethyl [C94; C96; C98]	2	2222.08	High	n/a	High		7.935e-06		7.371e-08	2.15
Q9CR21	Acyl carrier protein, mitochondrial OS=Mus musculus OX=10090 GN=Ndufab1 PE=1 SV=1	[K].LMCPQEIVDYIADKK.[D]	1xCarbamidomethyl [C3]	1.71942e-07	3.46687e-05	1	1	1	9	Q9CR21 [138-152]	Q9CR21 1xCarbamidomethyl [C140]	1	1822.91	High	n/a	High		7.935e-06		1.009e-08	3.56
Q9CR21	Acyl carrier protein, mitochondrial OS=Mus musculus OX=10090 GN=Ndufab1 PE=1 SV=1	[K].LMCPQEIVDYIADK.[K]	1xCarbamidomethyl [C3]	1.04543e-06	3.46687e-05	1	1	1	14	Q9CR21 [138-151]	Q9CR21 1xCarbamidomethyl [C140]	0	1694.81	High	n/a	High		7.935e-06		6.738e-08	3.44
Q9CR21	Acyl carrier protein, mitochondrial OS=Mus musculus OX=10090 GN=Ndufab1 PE=1 SV=1	[K].LMCPQEIVDYIADKK.[D]	1xCarbamidomethyl [C3]; 1xOxidation [M2]	1.94736e-07	3.46687e-05	1	1	1	17	Q9CR21 [138-152]	Q9CR21 1xCarbamidomethyl [C140]	1	1838.9	High	n/a	High		7.935e-06		1.144e-08	4.65
Q9CR21	Acyl carrier protein, mitochondrial OS=Mus musculus OX=10090 GN=Ndufab1 PE=1 SV=1	[K].LMCPQEIVDYIADK.[K]	1xCarbamidomethyl [C3]; 1xOxidation [M2]	6.52573e-07	3.46687e-05	1	1	1	24	Q9CR21 [138-151]	Q9CR21 1xCarbamidomethyl [C140]	0	1710.81	High	n/a	High		7.935e-06		4.095e-08	3.21
Q8R146	Acylamino-acid-releasing enzyme OS=Mus musculus OX=10090 GN=Apeh PE=1 SV=3	[R].LSPDQCR.[V]	1xCarbamidomethyl [C6]	0.0685221	0.00207277	1	2	1	3	Q8R146 [307-313]	Q8R146 1xCarbamidomethyl [C312]	0	875.404	High	n/a	High		0.0005556		0.008681	1.04
Q920L1	Acyl-CoA (8-3)-desaturase OS=Mus musculus OX=10090 GN=Fads1 PE=1 SV=1	[K].VAPLVQSLCAKYGIK.[Y]	1xCarbamidomethyl [C9]	1.19414e-07	3.46687e-05	1	1	1	7	Q920L1 [402-416]	Q920L1 1xCarbamidomethyl [C410]	1	1646.93	High	n/a	High		7.935e-06		6.855e-09	2.99
Q920L1	Acyl-CoA (8-3)-desaturase OS=Mus musculus OX=10090 GN=Fads1 PE=1 SV=1	[K].VAPLVQSLCAK.[Y]	1xCarbamidomethyl [C9]	9.57106e-05	3.46687e-05	1	1	1	6	Q920L1 [402-412]	Q920L1 1xCarbamidomethyl [C410]	0	1185.67	High	n/a	High		7.935e-06		7.941e-06	2.52
Q8K370	Acyl-CoA dehydrogenase family member 10 OS=Mus musculus OX=10090 GN=Acad10 PE=1 SV=1	[K].LCVFMGK.[T]	1xCarbamidomethyl [C2]	0.0143439	0.000508083	1	1	1	4	Q8K370 [837-843]	Q8K370 1xCarbamidomethyl [C838]	0	854.426	High	n/a	High		0.0001348		0.001437	1.95
Q8K370	Acyl-CoA dehydrogenase family member 10 OS=Mus musculus OX=10090 GN=Acad10 PE=1 SV=1	[K].LCVFMGK.[T]	1xCarbamidomethyl [C2]; 1xOxidation [M5]	0.129798	0.00417204	1	1	1	1	Q8K370 [837-843]	Q8K370 1xCarbamidomethyl [C838]	0	870.421	High	n/a	High		0.001055		0.02062	1.82
Q8K370	Acyl-CoA dehydrogenase family member 10 OS=Mus musculus OX=10090 GN=Acad10 PE=1 SV=1	[R].IFQLCLQR.[L]	1xCarbamidomethyl [C5]	0.0266679	0.000883695	1	1	1	1	Q8K370 [193-200]	Q8K370 1xCarbamidomethyl [C197]	0	1077.59	High	n/a	High		0.0002541		0.002816	1.54
Q80XL6	Acyl-CoA dehydrogenase family member 11 OS=Mus musculus OX=10090 GN=Acad11 PE=1 SV=2	[R].ILQIMCDR.[A]	1xCarbamidomethyl [C6]	0.00506448	0.000289748	1	1	1	2	Q80XL6 [645-652]	Q80XL6 1xCarbamidomethyl [C650]	0	1048.53	High	n/a	High		6.478e-05		0.0004876	2.75
Q80XL6	Acyl-CoA dehydrogenase family member 11 OS=Mus musculus OX=10090 GN=Acad11 PE=1 SV=2	[R].ILQIMCDR.[A]	1xCarbamidomethyl [C6]; 1xOxidation [M5]	0.0529032	0.00152429	1	1	1	1	Q80XL6 [645-652]	Q80XL6 1xCarbamidomethyl [C650]	0	1064.52	High	n/a	High		0.0004295		0.006266	1.64
Q80XL6	Acyl-CoA dehydrogenase family member 11 OS=Mus musculus OX=10090 GN=Acad11 PE=1 SV=2	[K].YGTGVGYCK.[R]	1xCarbamidomethyl [C8]	0.000859584	7.02174e-05	1	1	1	2	Q80XL6 [167-175]	Q80XL6 1xCarbamidomethyl [C174]	0	1004.45	High	n/a	High		1.496e-05		7.898e-05	1.41
Q91YX5	Acyl-CoA:lysophosphatidylglycerol acyltransferase 1 OS=Mus musculus OX=10090 GN=Lpgat1 PE=1 SV=1	[R].GLECKSR.[G]	1xCarbamidomethyl [C4]	0.107731	0.00365998	1	1	1	1	Q91YX5 [241-247]	Q91YX5 1xCarbamidomethyl [C244]	1	849.425	High	n/a	High		0.0009174		0.01579	1.7
Q5XG73	Acyl-CoA-binding domain-containing protein 5 OS=Mus musculus OX=10090 GN=Acbd5 PE=1 SV=1	[R].SSEDEKPGDESSQQTGHTIVCAHQDR.[N]	1xCarbamidomethyl [C21]	8.67691e-06	3.46687e-05	1	3	1	1	Q5XG73 [252-277]	Q5XG73 1xCarbamidomethyl [C272]	0	2898.26	High	n/a	High		7.935e-06		6.315e-07	1.83
Q9D061	Acyl-CoA-binding domain-containing protein 6 OS=Mus musculus OX=10090 GN=Acbd6 PE=1 SV=2	[K].NIFDYCR.[E]	1xCarbamidomethyl [C6]	0.0604968	0.00175755	1	1	1	2	Q9D061 [161-167]	Q9D061 1xCarbamidomethyl [C166]	0	987.435	High	n/a	High		0.0004971		0.007399	1.99
Q9D061	Acyl-CoA-binding domain-containing protein 6 OS=Mus musculus OX=10090 GN=Acbd6 PE=1 SV=2	[R].ALLHWACDR.[G]	1xCarbamidomethyl [C7]	0.00300333	0.000202726	1	1	1	1	Q9D061 [194-202]	Q9D061 1xCarbamidomethyl [C200]	0	1141.56	High	n/a	High		4.09e-05		0.0002851	1.73
O55137	Acyl-coenzyme A thioesterase 1 OS=Mus musculus OX=10090 GN=Acot1 PE=1 SV=1	[R].SCWDEPLSIAVR.[G]	1xCarbamidomethyl [C2]	1.78301e-05	3.46687e-05	1	5	1	3	O55137 [13-24]	O55137 1xCarbamidomethyl [C14]	0	1432.69	High	n/a	High		7.935e-06		1.352e-06	2.63
O55137	Acyl-coenzyme A thioesterase 1 OS=Mus musculus OX=10090 GN=Acot1 PE=1 SV=1	[K].QLGSECLHVSPK.[I]	1xCarbamidomethyl [C6]	1.78301e-05	3.46687e-05	1	1	1	2	O55137 [407-418]	O55137 1xCarbamidomethyl [C412]	0	1354.68	High	n/a	High		7.935e-06		1.348e-06	2.12
Q8VHQ9	Acyl-coenzyme A thioesterase 11 OS=Mus musculus OX=10090 GN=Acot11 PE=1 SV=1	[R].LVYADTIKDLLTHCVIQDDLDK.[D]	1xCarbamidomethyl [C14]	1.31734e-06	3.46687e-05	1	1	1	2	Q8VHQ9 [187-208]	Q8VHQ9 1xCarbamidomethyl [C200]	1	2588.33	High	n/a	High		7.935e-06		8.663e-08	2.77
Q8VHQ9	Acyl-coenzyme A thioesterase 11 OS=Mus musculus OX=10090 GN=Acot11 PE=1 SV=1	[R].NPTEVQMSQLVLPCHTNHR.[G]	1xCarbamidomethyl [C14]	2.87645e-10	3.46687e-05	1	1	1	6	Q8VHQ9 [45-63]	Q8VHQ9 1xCarbamidomethyl [C58]	0	2261.09	High	n/a	High		7.935e-06		1.188e-11	5.51
Q8VHQ9	Acyl-coenzyme A thioesterase 11 OS=Mus musculus OX=10090 GN=Acot11 PE=1 SV=1	[R].NPTEVQMSQLVLPCHTNHR.[G]	1xCarbamidomethyl [C14]; 1xOxidation [M7]	1.35088e-10	3.46687e-05	1	1	1	8	Q8VHQ9 [45-63]	Q8VHQ9 1xCarbamidomethyl [C58]	0	2277.09	High	n/a	High		7.935e-06		5.348e-12	5.39
Q8VHQ9	Acyl-coenzyme A thioesterase 11 OS=Mus musculus OX=10090 GN=Acot11 PE=1 SV=1	[R].LCHAHPTLK.[A]	1xCarbamidomethyl [C2]	1.17398e-05	3.46687e-05	1	1	1	60	Q8VHQ9 [258-266]	Q8VHQ9 1xCarbamidomethyl [C259]	0	1076.57	High	n/a	High		7.935e-06		8.672e-07	1.25
Q8VHQ9	Acyl-coenzyme A thioesterase 11 OS=Mus musculus OX=10090 GN=Acot11 PE=1 SV=1	[K].ACESFLLDNR.[N]	1xCarbamidomethyl [C2]	5.86937e-05	3.46687e-05	1	1	1	4	Q8VHQ9 [575-584]	Q8VHQ9 1xCarbamidomethyl [C576]	0	1224.57	High	n/a	High		7.935e-06		4.754e-06	1.98
Q8VHQ9	Acyl-coenzyme A thioesterase 11 OS=Mus musculus OX=10090 GN=Acot11 PE=1 SV=1	[K].DCSNMVPAEK.[T]	1xCarbamidomethyl [C2]	0.000184785	3.46687e-05	1	1	1	3	Q8VHQ9 [209-218]	Q8VHQ9 1xCarbamidomethyl [C210]	0	1150.49	High	n/a	High		7.935e-06		1.58e-05	1.37
Q8VHQ9	Acyl-coenzyme A thioesterase 11 OS=Mus musculus OX=10090 GN=Acot11 PE=1 SV=1	[K].DLLTHCVIQDDLDK.[D]	1xCarbamidomethyl [C6]	1.71876e-08	3.46687e-05	1	1	1	8	Q8VHQ9 [195-208]	Q8VHQ9 1xCarbamidomethyl [C200]	0	1684.82	High	n/a	High		7.935e-06		8.826e-10	6.16
Q8VHQ9	Acyl-coenzyme A thioesterase 11 OS=Mus musculus OX=10090 GN=Acot11 PE=1 SV=1	[R].KYLVSCK.[Q]	1xCarbamidomethyl [C6]	0.134845	0.00437417	1	1	1	2	Q8VHQ9 [364-370]	Q8VHQ9 1xCarbamidomethyl [C369]	1	897.486	High	n/a	High		0.001097		0.02163	1.36
Q8VHQ9	Acyl-coenzyme A thioesterase 11 OS=Mus musculus OX=10090 GN=Acot11 PE=1 SV=1	[K].WIDTTACLSAER.[H]	1xCarbamidomethyl [C7]	1.09337e-05	3.46687e-05	1	1	1	6	Q8VHQ9 [74-85]	Q8VHQ9 1xCarbamidomethyl [C80]	0	1422.67	High	n/a	High		7.935e-06		8.075e-07	3.84
Q8VHQ9	Acyl-coenzyme A thioesterase 11 OS=Mus musculus OX=10090 GN=Acot11 PE=1 SV=1	[R].SVTLPTHHETPEYQRGETLCSGFCLWR.[E]	2xCarbamidomethyl [C20; C24]	7.6496e-10	3.46687e-05	1	1	1	3	Q8VHQ9 [510-536]	Q8VHQ9 2xCarbamidomethyl [C529; C533]	1	3261.52	High	n/a	High		7.935e-06		3.321e-11	4.67
Q8VHQ9	Acyl-coenzyme A thioesterase 11 OS=Mus musculus OX=10090 GN=Acot11 PE=1 SV=1	[R].HAGCPCVTASMDDIYFDHTISVGQVVNIK.[A]	2xCarbamidomethyl [C4; C6]	8.9877e-07	3.46687e-05	1	1	1	1	Q8VHQ9 [86-114]	Q8VHQ9 2xCarbamidomethyl [C89; C91]	0	3234.5	High	n/a	High		7.935e-06		5.737e-08	4.21
Q8VHQ9	Acyl-coenzyme A thioesterase 11 OS=Mus musculus OX=10090 GN=Acot11 PE=1 SV=1	[R].GETLCSGFCLWR.[E]	2xCarbamidomethyl [C5; C9]	8.44851e-06	3.46687e-05	1	1	1	4	Q8VHQ9 [525-536]	Q8VHQ9 2xCarbamidomethyl [C529; C533]	0	1485.66	High	n/a	High		7.935e-06		6.111e-07	3.73
Q9CQR4	Acyl-coenzyme A thioesterase 13 OS=Mus musculus OX=10090 GN=Acot13 PE=1 SV=1	[K].VTLVSAAPEKLICEMKVEEQHTNK.[L]	1xCarbamidomethyl [C13]	5.80445e-11	3.46687e-05	1	1	1	3	Q9CQR4 [28-51]	Q9CQR4 1xCarbamidomethyl [C40]	2	2754.42	High	n/a	High		7.935e-06		2.191e-12	6.71
Q9CQR4	Acyl-coenzyme A thioesterase 13 OS=Mus musculus OX=10090 GN=Acot13 PE=1 SV=1	[K].LGTLHGGLTATLVDSISTMALMCTER.[G]	1xCarbamidomethyl [C23]	3.8304e-05	3.46687e-05	1	1	1	1	Q9CQR4 [52-77]	Q9CQR4 1xCarbamidomethyl [C74]	0	2748.37	High	n/a	High		7.935e-06		3.015e-06	3.89
Q9CQR4	Acyl-coenzyme A thioesterase 13 OS=Mus musculus OX=10090 GN=Acot13 PE=1 SV=1	[K].LGTLHGGLTATLVDSISTMALMCTER.[G]	1xCarbamidomethyl [C23]; 1xOxidation [M22]	4.81578e-11	3.46687e-05	1	1	1	5	Q9CQR4 [52-77]	Q9CQR4 1xCarbamidomethyl [C74]	0	2764.37	High	n/a	High		7.935e-06		1.793e-12	6.92
Q9CQR4	Acyl-coenzyme A thioesterase 13 OS=Mus musculus OX=10090 GN=Acot13 PE=1 SV=1	[K].LGTLHGGLTATLVDSISTMALMCTER.[G]	1xCarbamidomethyl [C23]; 2xOxidation [M19; M22]	2.60943e-09	3.46687e-05	1	1	1	2	Q9CQR4 [52-77]	Q9CQR4 1xCarbamidomethyl [C74]	0	2780.36	High	n/a	High		7.935e-06		1.215e-10	4.55
Q9CQR4	Acyl-coenzyme A thioesterase 13 OS=Mus musculus OX=10090 GN=Acot13 PE=1 SV=1	[K].LICEMKVEEQHTNK.[L]	1xCarbamidomethyl [C3]	1.73544e-06	3.46687e-05	1	1	1	2	Q9CQR4 [38-51]	Q9CQR4 1xCarbamidomethyl [C40]	1	1758.85	High	n/a	High		7.935e-06		1.152e-07	3.85
Q9CQR4	Acyl-coenzyme A thioesterase 13 OS=Mus musculus OX=10090 GN=Acot13 PE=1 SV=1	[K].LICEMKVEEQHTNK.[L]	1xCarbamidomethyl [C3]; 1xOxidation [M5]	0.000154687	3.46687e-05	1	1	1	2	Q9CQR4 [38-51]	Q9CQR4 1xCarbamidomethyl [C40]	1	1774.85	High	n/a	High		7.935e-06		1.312e-05	1.86
P58137	Acyl-coenzyme A thioesterase 8 OS=Mus musculus OX=10090 GN=Acot8 PE=1 SV=1	[K].SVSEDVHVHSLHCYFVR.[A]	1xCarbamidomethyl [C13]	6.52073e-09	3.46687e-05	1	1	1	5	P58137 [71-87]	P58137 1xCarbamidomethyl [C83]	0	2070.98	High	n/a	High		7.935e-06		3.18e-10	3.05
P58137	Acyl-coenzyme A thioesterase 8 OS=Mus musculus OX=10090 GN=Acot8 PE=1 SV=1	[R].DGVLAVTCAQEGVIR.[L]	1xCarbamidomethyl [C8]	2.52019e-07	3.46687e-05	1	1	1	1	P58137 [296-310]	P58137 1xCarbamidomethyl [C303]	0	1587.82	High	n/a	High		7.935e-06		1.511e-08	3.98
Q9R0X4	Acyl-coenzyme A thioesterase 9, mitochondrial OS=Mus musculus OX=10090 GN=Acot9 PE=1 SV=1	[R].ILEDLDSLGVLVCYMHNHNHSTK.[M]	1xCarbamidomethyl [C13]	2.05013e-12	3.46687e-05	1	1	1	1	Q9R0X4 [115-137]	Q9R0X4 1xCarbamidomethyl [C127]	0	2695.3	High	n/a	High		7.935e-06		6.402e-14	3.87
Q9R0X4	Acyl-coenzyme A thioesterase 9, mitochondrial OS=Mus musculus OX=10090 GN=Acot9 PE=1 SV=1	[K].MSPLSIVTVLVDKIDMCK.[H]	1xCarbamidomethyl [C17]; 1xOxidation [M1]	4.25863e-07	3.46687e-05	1	1	1	2	Q9R0X4 [138-155]	Q9R0X4 1xCarbamidomethyl [C154]	1	2065.07	High	n/a	High		7.935e-06		2.623e-08	6.03
Q9R0X4	Acyl-coenzyme A thioesterase 9, mitochondrial OS=Mus musculus OX=10090 GN=Acot9 PE=1 SV=1	[K].MSPLSIVTVLVDKIDMCK.[H]	1xCarbamidomethyl [C17]; 2xOxidation [M1; M16]	1.11129e-09	3.46687e-05	1	1	1	5	Q9R0X4 [138-155]	Q9R0X4 1xCarbamidomethyl [C154]	1	2081.07	High	n/a	High		7.935e-06		4.909e-11	2.97
Q9R0X4	Acyl-coenzyme A thioesterase 9, mitochondrial OS=Mus musculus OX=10090 GN=Acot9 PE=1 SV=1	[K].SLDICHPQER.[N]	1xCarbamidomethyl [C5]	0.000126082	3.46687e-05	1	2	1	16	Q9R0X4 [295-304]	Q9R0X4 1xCarbamidomethyl [C299]	0	1254.59	High	n/a	High		7.935e-06		1.055e-05	2.66
Q9R0X4	Acyl-coenzyme A thioesterase 9, mitochondrial OS=Mus musculus OX=10090 GN=Acot9 PE=1 SV=1	[K].LKSLDICHPQER.[N]	1xCarbamidomethyl [C7]	1.49141e-07	3.46687e-05	1	2	1	1	Q9R0X4 [293-304]	Q9R0X4 1xCarbamidomethyl [C299]	1	1495.77	High	n/a	High		7.935e-06		8.682e-09	3.5
Q3UUI3	Acyl-coenzyme A thioesterase THEM4 OS=Mus musculus OX=10090 GN=Them4 PE=1 SV=1	[R].LLFDQFMKKCEDGSWK.[R]	1xCarbamidomethyl [C10]; 1xOxidation [M7]	8.67935e-05	3.46687e-05	1	1	1	2	Q3UUI3 [50-65]	Q3UUI3 1xCarbamidomethyl [C59]	2	2047.96	High	n/a	High		7.935e-06		7.122e-06	2.44
Q3UUI3	Acyl-coenzyme A thioesterase THEM4 OS=Mus musculus OX=10090 GN=Them4 PE=1 SV=1	[K].KCEDGSWK.[R]	1xCarbamidomethyl [C2]	0.00774172	0.000344914	1	1	1	2	Q3UUI3 [58-65]	Q3UUI3 1xCarbamidomethyl [C59]	1	1009.44	High	n/a	High		8.063e-05		0.000754	1.81
Q3UUI3	Acyl-coenzyme A thioesterase THEM4 OS=Mus musculus OX=10090 GN=Them4 PE=1 SV=1	[K].LFVSCTIQSIDEK.[T]	1xCarbamidomethyl [C5]	8.82928e-07	3.46687e-05	1	1	1	10	Q3UUI3 [198-210]	Q3UUI3 1xCarbamidomethyl [C202]	0	1539.77	High	n/a	High		7.935e-06		5.629e-08	2.84
Q3UUI3	Acyl-coenzyme A thioesterase THEM4 OS=Mus musculus OX=10090 GN=Them4 PE=1 SV=1	[R].KLFVSCTIQSIDEK.[T]	1xCarbamidomethyl [C6]	1.11215e-07	3.46687e-05	1	1	1	7	Q3UUI3 [197-210]	Q3UUI3 1xCarbamidomethyl [C202]	1	1667.87	High	n/a	High		7.935e-06		6.369e-09	4.02
Q9ESW4	Acylglycerol kinase, mitochondrial OS=Mus musculus OX=10090 GN=Agk PE=1 SV=1	[K].ATVFLNPAACKGKAR.[T]	1xCarbamidomethyl [C10]	1.81364e-07	3.46687e-05	1	2	1	5	Q9ESW4 [63-77]	Q9ESW4 1xCarbamidomethyl [C72]	2	1603.87	High	n/a	High		7.935e-06		1.06e-08	4.01
Q9ESW4	Acylglycerol kinase, mitochondrial OS=Mus musculus OX=10090 GN=Agk PE=1 SV=1	[K].ATVFLNPAACKGK.[A]	1xCarbamidomethyl [C10]	2.7556e-06	3.46687e-05	1	2	1	10	Q9ESW4 [63-75]	Q9ESW4 1xCarbamidomethyl [C72]	1	1376.74	High	n/a	High		7.935e-06		1.887e-07	2.87
Q9ESW4	Acylglycerol kinase, mitochondrial OS=Mus musculus OX=10090 GN=Agk PE=1 SV=1	[K].ATVFLNPAACK.[G]	1xCarbamidomethyl [C10]	0.000752376	3.46687e-05	1	2	1	1	Q9ESW4 [63-73]	Q9ESW4 1xCarbamidomethyl [C72]	0	1191.62	High	n/a	High		7.935e-06		6.862e-05	2.91
Q9ESW4	Acylglycerol kinase, mitochondrial OS=Mus musculus OX=10090 GN=Agk PE=1 SV=1	[K].KATVFLNPAACK.[G]	1xCarbamidomethyl [C11]	1.94736e-07	3.46687e-05	1	2	1	4	Q9ESW4 [62-73]	Q9ESW4 1xCarbamidomethyl [C72]	1	1319.71	High	n/a	High		7.935e-06		1.143e-08	3.59
Q9ESW4	Acylglycerol kinase, mitochondrial OS=Mus musculus OX=10090 GN=Agk PE=1 SV=1	[K].KATVFLNPAACKGK.[A]	1xCarbamidomethyl [C11]	7.85942e-09	3.46687e-05	1	2	1	3	Q9ESW4 [62-75]	Q9ESW4 1xCarbamidomethyl [C72]	2	1504.83	High	n/a	High		7.935e-06		3.889e-10	4.43
Q9ESW4	Acylglycerol kinase, mitochondrial OS=Mus musculus OX=10090 GN=Agk PE=1 SV=1	[R].NTQLDLMSKEDFMNICIEPDTVSK.[G]	1xCarbamidomethyl [C16]	1.84619e-07	3.46687e-05	1	1	1	2	Q9ESW4 [318-341]	Q9ESW4 1xCarbamidomethyl [C333]	1	2828.32	High	n/a	High		7.935e-06		1.082e-08	2.36
Q9ESW4	Acylglycerol kinase, mitochondrial OS=Mus musculus OX=10090 GN=Agk PE=1 SV=1	[K].HCDNLLR.[R]	1xCarbamidomethyl [C2]	0.00240631	0.000136771	1	2	1	24	Q9ESW4 [33-39]	Q9ESW4 1xCarbamidomethyl [C34]	0	927.447	High	n/a	High		2.796e-05		0.0002267	1.86
Q9ESW4	Acylglycerol kinase, mitochondrial OS=Mus musculus OX=10090 GN=Agk PE=1 SV=1	[R].FFCDPRK.[R]	1xCarbamidomethyl [C3]	0.00553299	0.000289748	1	1	1	9	Q9ESW4 [405-411]	Q9ESW4 1xCarbamidomethyl [C407]	1	969.461	High	n/a	High		7.049e-05		0.0005331	1.29
Q9ESW4	Acylglycerol kinase, mitochondrial OS=Mus musculus OX=10090 GN=Agk PE=1 SV=1	[K].LRFFCDPRK.[R]	1xCarbamidomethyl [C5]	0.0259827	0.000883695	1	1	1	3	Q9ESW4 [403-411]	Q9ESW4 1xCarbamidomethyl [C407]	2	1238.65	High	n/a	High		0.0002541		0.002739	2.03
Q9ESW4	Acylglycerol kinase, mitochondrial OS=Mus musculus OX=10090 GN=Agk PE=1 SV=1	[K].LRFFCDPR.[K]	1xCarbamidomethyl [C5]	0.0420811	0.00121876	1	1	1	3	Q9ESW4 [403-410]	Q9ESW4 1xCarbamidomethyl [C407]	1	1110.55	High	n/a	High		0.0003575		0.004739	1.71
Q9ESW4	Acylglycerol kinase, mitochondrial OS=Mus musculus OX=10090 GN=Agk PE=1 SV=1	[K].EDFMNICIEPDTVSK.[G]	1xCarbamidomethyl [C7]	3.06471e-07	3.46687e-05	1	1	1	11	Q9ESW4 [327-341]	Q9ESW4 1xCarbamidomethyl [C333]	0	1797.8	High	n/a	High		7.935e-06		1.844e-08	3.24
Q9ESW4	Acylglycerol kinase, mitochondrial OS=Mus musculus OX=10090 GN=Agk PE=1 SV=1	[K].EDFMNICIEPDTVSK.[G]	1xCarbamidomethyl [C7]; 1xOxidation [M4]	2.26426e-08	3.46687e-05	1	1	1	9	Q9ESW4 [327-341]	Q9ESW4 1xCarbamidomethyl [C333]	0	1813.8	High	n/a	High		7.935e-06		1.19e-09	1.82
Q9ESW4	Acylglycerol kinase, mitochondrial OS=Mus musculus OX=10090 GN=Agk PE=1 SV=1	[R].AACQEAQVFGNQLIPPNAQVKKATVFLNPAACK.[G]	2xCarbamidomethyl [C3; C32]	5.71307e-06	3.46687e-05	1	2	1	2	Q9ESW4 [41-73]	Q9ESW4 2xCarbamidomethyl [C43; C72]	2	3583.85	High	n/a	High		0.0002131		6.567e-05	4.67
P56375	Acylphosphatase-2 OS=Mus musculus OX=10090 GN=Acyp2 PE=1 SV=2	[K].SVDYEVFGTVQGVCFR.[M]	1xCarbamidomethyl [C14]	1.81364e-07	3.46687e-05	1	1	1	1	P56375 [16-31]	P56375 1xCarbamidomethyl [C29]	0	1862.87	High	n/a	High		7.935e-06		1.063e-08	2.42
P97823	Acyl-protein thioesterase 1 OS=Mus musculus OX=10090 GN=Lypla1 PE=1 SV=1	[K].LAGVTALSCWLPLR.[A]	1xCarbamidomethyl [C9]	8.90814e-07	3.46687e-05	1	2	1	4	P97823 [136-149]	P97823 1xCarbamidomethyl [C144]	0	1556.86	High	n/a	High		7.935e-06		5.71e-08	4.39
Q9WTL7	Acyl-protein thioesterase 2 OS=Mus musculus OX=10090 GN=Lypla2 PE=1 SV=1	[K].TYPGVMHSSCPQEMAAVK.[E]	1xCarbamidomethyl [C10]	1.7969e-08	3.46687e-05	1	1	1	3	Q9WTL7 [204-221]	Q9WTL7 1xCarbamidomethyl [C213]	0	1992.9	High	n/a	High		7.935e-06		9.286e-10	2.02
Q9WTL7	Acyl-protein thioesterase 2 OS=Mus musculus OX=10090 GN=Lypla2 PE=1 SV=1	[K].YICPHAPR.[I]	1xCarbamidomethyl [C3]	0.00049119	3.46687e-05	1	1	1	16	Q9WTL7 [54-61]	Q9WTL7 1xCarbamidomethyl [C56]	0	1013.5	High	n/a	High		7.935e-06		4.418e-05	2.41
Q9WTL7	Acyl-protein thioesterase 2 OS=Mus musculus OX=10090 GN=Lypla2 PE=1 SV=1	[K].DLAILQCHGELDPMVPVR.[F]	1xCarbamidomethyl [C7]	8.36737e-08	3.46687e-05	1	1	1	10	Q9WTL7 [165-182]	Q9WTL7 1xCarbamidomethyl [C171]	0	2063.04	High	n/a	High		7.935e-06		4.706e-09	5.19
Q9WTL7	Acyl-protein thioesterase 2 OS=Mus musculus OX=10090 GN=Lypla2 PE=1 SV=1	[K].DLAILQCHGELDPMVPVR.[F]	1xCarbamidomethyl [C7]; 1xOxidation [M14]	9.06797e-07	3.46687e-05	1	1	1	6	Q9WTL7 [165-182]	Q9WTL7 1xCarbamidomethyl [C171]	0	2079.04	High	n/a	High		7.935e-06		5.841e-08	3.94
Q9WTL7	Acyl-protein thioesterase 2 OS=Mus musculus OX=10090 GN=Lypla2 PE=1 SV=1	[R].LPHVKYICPHAPR.[I]	1xCarbamidomethyl [C8]	2.40967e-08	3.46687e-05	1	1	1	4	Q9WTL7 [49-61]	Q9WTL7 1xCarbamidomethyl [C56]	1	1587.86	High	n/a	High		7.935e-06		1.269e-09	4.46
Q8R0F8	Acylpyruvase FAHD1, mitochondrial OS=Mus musculus OX=10090 GN=Fahd1 PE=1 SV=2	[K].NIVCVGR.[N]	1xCarbamidomethyl [C4]	0.0201846	0.000729106	1	1	1	9	Q8R0F8 [22-28]	Q8R0F8 1xCarbamidomethyl [C25]	0	817.435	High	Low	High	0.1248	0.0002046	0.1835	0.00207	1.31	29
Q8R0F8	Acylpyruvase FAHD1, mitochondrial OS=Mus musculus OX=10090 GN=Fahd1 PE=1 SV=2	[K].SFTSSCPVSAFVPK.[E]	1xCarbamidomethyl [C6]	2.54458e-05	3.46687e-05	1	1	1	10	Q8R0F8 [127-140]	Q8R0F8 1xCarbamidomethyl [C132]	0	1513.74	High	n/a	High		7.935e-06		1.968e-06	2.81
Q9CR95	Adaptin ear-binding coat-associated protein 1 OS=Mus musculus OX=10090 GN=Necap1 PE=1 SV=2	[-].MAAELEYESVLCVKPDVSVYR.[I]	1xCarbamidomethyl [C12]; 1xMet-loss+Acetyl [N-Term]	9.1524e-06	3.46687e-05	1	1	1	2	Q9CR95 [1-21]	Q9CR95 1xCarbamidomethyl [C12]; 1xMet-loss+Acetyl [N-Term]	0	2369.17	High	n/a	High		0.0002131		8.701e-05	4.03
Q9D1J1	Adaptin ear-binding coat-associated protein 2 OS=Mus musculus OX=10090 GN=Necap2 PE=1 SV=1	[K].QQCEFAK.[Q]	1xCarbamidomethyl [C3]	0.166167	0.00575514	1	1	1	1	Q9D1J1 [131-137]	Q9D1J1 1xCarbamidomethyl [C133]	0	910.409	High	n/a	High		0.001423		0.02968	2.54
P08030	Adenine phosphoribosyltransferase OS=Mus musculus OX=10090 GN=Aprt PE=1 SV=2	[R].GFLFGPSLAQELGVGCVLIR.[K]	1xCarbamidomethyl [C16]	4.73089e-11	3.46687e-05	1	1	1	2	P08030 [68-87]	P08030 1xCarbamidomethyl [C83]	0	2133.15	High	n/a	High		7.935e-06		1.762e-12	4.11
P08030	Adenine phosphoribosyltransferase OS=Mus musculus OX=10090 GN=Aprt PE=1 SV=2	[R].AEVVECVSLVELTSLK.[G]	1xCarbamidomethyl [C6]	0.00033819	3.46687e-05	1	1	1	2	P08030 [148-163]	P08030 1xCarbamidomethyl [C153]	0	1775.95	High	n/a	High		7.935e-06		2.983e-05	1.87
Q9Z1K7	Adenomatous polyposis coli protein 2 OS=Mus musculus OX=10090 GN=Apc2 PE=1 SV=1	[R].EVGSMTALMECVLR.[A]	1xCarbamidomethyl [C11]	6.82706e-05	3.46687e-05	1	1	1	1	Q9Z1K7 [523-536]	Q9Z1K7 1xCarbamidomethyl [C533]	0	1595.76	High	n/a	High		7.935e-06		5.571e-06	3.01
Q9Z1K7	Adenomatous polyposis coli protein 2 OS=Mus musculus OX=10090 GN=Apc2 PE=1 SV=1	[R].SATDKELEALRECLGAAMPAR.[L]	1xCarbamidomethyl [C13]	0.000999644	7.02174e-05	1	1	1	1	Q9Z1K7 [1320-1340]	Q9Z1K7 1xCarbamidomethyl [C1332]	2	2289.13	High	n/a	High		1.496e-05		9.25e-05	1.69
Q9Z1K7	Adenomatous polyposis coli protein 2 OS=Mus musculus OX=10090 GN=Apc2 PE=1 SV=1	[R].GCMEAIVAQLGSESEELHQVVSSILR.[N]	1xCarbamidomethyl [C2]; 1xOxidation [M3]	5.70652e-09	3.46687e-05	1	1	1	2	Q9Z1K7 [482-507]	Q9Z1K7 1xCarbamidomethyl [C483]	0	2858.4	High	n/a	High		7.935e-06		2.776e-10	3.23
Q9Z1K7	Adenomatous polyposis coli protein 2 OS=Mus musculus OX=10090 GN=Apc2 PE=1 SV=1	[R].SGCLPLLLQILHGTEAGSVGR.[A]	1xCarbamidomethyl [C3]	8.58368e-11	3.46687e-05	1	1	1	5	Q9Z1K7 [310-330]	Q9Z1K7 1xCarbamidomethyl [C312]	0	2178.17	High	n/a	High		7.935e-06		3.292e-12	5.26
Q9Z1K7	Adenomatous polyposis coli protein 2 OS=Mus musculus OX=10090 GN=Apc2 PE=1 SV=1	[R].FLDIADCR.[E]	1xCarbamidomethyl [C7]	0.0193219	0.000729106	1	1	1	1	Q9Z1K7 [1227-1234]	Q9Z1K7 1xCarbamidomethyl [C1233]	0	1009.48	High	n/a	High		0.0002046		0.001974	2.61
Q61315	Adenomatous polyposis coli protein OS=Mus musculus OX=10090 GN=Apc PE=1 SV=1	[R].SSASTTEFHCVADDR.[S]	1xCarbamidomethyl [C10]	9.56123e-08	3.46687e-05	1	4	1	2	Q61315 [903-917]	Q61315 1xCarbamidomethyl [C912]	0	1682.71	High	n/a	High		7.935e-06		5.4e-09	3.3
Q61315	Adenomatous polyposis coli protein OS=Mus musculus OX=10090 GN=Apc PE=1 SV=1	[K].FCSYGQYPADLAHK.[I]	1xCarbamidomethyl [C2]	4.57586e-05	3.46687e-05	1	4	1	1	Q61315 [992-1005]	Q61315 1xCarbamidomethyl [C993]	0	1656.75	High	n/a	High		7.935e-06		3.63e-06	2.53
Q61315	Adenomatous polyposis coli protein OS=Mus musculus OX=10090 GN=Apc PE=1 SV=1	[K].AIQEGANSIVSSLHQAAAAAACLSR.[Q]	1xCarbamidomethyl [C22]	9.91492e-06	3.46687e-05	1	4	1	1	Q61315 [2102-2126]	Q61315 1xCarbamidomethyl [C2123]	0	2496.26	High	n/a	High		7.935e-06		7.244e-07	3.24
Q61315	Adenomatous polyposis coli protein OS=Mus musculus OX=10090 GN=Apc PE=1 SV=1	[R].IEDCPINNPR.[S]	1xCarbamidomethyl [C4]	3.23501e-05	3.46687e-05	1	4	1	1	Q61315 [2661-2670]	Q61315 1xCarbamidomethyl [C2664]	0	1227.58	High	n/a	High		7.935e-06		2.514e-06	2.9
Q61315	Adenomatous polyposis coli protein OS=Mus musculus OX=10090 GN=Apc PE=1 SV=1	[R].SGECSPVPMGSFPR.[R]	1xCarbamidomethyl [C4]	1.42763e-05	3.46687e-05	1	4	1	1	Q61315 [105-118]	Q61315 1xCarbamidomethyl [C108]	0	1507.67	High	n/a	High		7.935e-06		1.069e-06	3.5
Q61315	Adenomatous polyposis coli protein OS=Mus musculus OX=10090 GN=Apc PE=1 SV=1	[R].QSGCLPLLIQLLHGNDK.[D]	1xCarbamidomethyl [C4]	4.33338e-08	3.46687e-05	1	2	1	4	Q61315 [347-363]	Q61315 1xCarbamidomethyl [C350]	0	1906.02	High	n/a	High		7.935e-06		2.34e-09	5.46
Q61315	Adenomatous polyposis coli protein OS=Mus musculus OX=10090 GN=Apc PE=1 SV=1	[R].ENNCLQTLLQHLK.[S]	1xCarbamidomethyl [C4]	4.99971e-06	3.46687e-05	1	4	1	6	Q61315 [656-668]	Q61315 1xCarbamidomethyl [C659]	0	1610.83	High	n/a	High		7.935e-06		3.512e-07	3.64
Q61315	Adenomatous polyposis coli protein OS=Mus musculus OX=10090 GN=Apc PE=1 SV=1	[K].ATLCSMK.[G]	1xCarbamidomethyl [C4]	0.0142185	0.000508083	1	4	1	1	Q61315 [515-521]	Q61315 1xCarbamidomethyl [C518]	0	810.385	High	n/a	High		0.0001348		0.001424	1.27
Q61315	Adenomatous polyposis coli protein OS=Mus musculus OX=10090 GN=Apc PE=1 SV=1	[K].ATLCSMK.[G]	1xCarbamidomethyl [C4]; 1xOxidation [M6]	0.126846	0.00412416	1	4	1	1	Q61315 [515-521]	Q61315 1xCarbamidomethyl [C518]	0	826.38	High	n/a	High		0.001036		0.01983	1.35
Q61315	Adenomatous polyposis coli protein OS=Mus musculus OX=10090 GN=Apc PE=1 SV=1	[K].ALMECALEVK.[K]	1xCarbamidomethyl [C5]	6.13618e-05	3.46687e-05	1	4	1	1	Q61315 [569-578]	Q61315 1xCarbamidomethyl [C573]	0	1163.58	High	n/a	High		7.935e-06		4.96e-06	2.62
Q61315	Adenomatous polyposis coli protein OS=Mus musculus OX=10090 GN=Apc PE=1 SV=1	[K].ALMECALEVK.[K]	1xCarbamidomethyl [C5]; 1xOxidation [M3]	0.000201963	3.46687e-05	1	4	1	1	Q61315 [569-578]	Q61315 1xCarbamidomethyl [C573]	0	1179.57	High	n/a	High		7.935e-06		1.74e-05	1.54
Q61315	Adenomatous polyposis coli protein OS=Mus musculus OX=10090 GN=Apc PE=1 SV=1	[K].NPMPAPVEHQICPAVCVLMK.[L]	2xCarbamidomethyl [C12; C16]	2.05328e-08	3.46687e-05	1	4	1	1	Q61315 [434-453]	Q61315 2xCarbamidomethyl [C445; C449]	0	2291.12	High	n/a	High		7.935e-06		1.07e-09	3.75
Q61315	Adenomatous polyposis coli protein OS=Mus musculus OX=10090 GN=Apc PE=1 SV=1	[K].NPMPAPVEHQICPAVCVLMK.[L]	2xCarbamidomethyl [C12; C16]; 1xOxidation [M3]	5.17479e-09	3.46687e-05	1	4	1	2	Q61315 [434-453]	Q61315 2xCarbamidomethyl [C445; C449]	0	2307.11	High	n/a	High		7.935e-06		2.489e-10	4.18
Q91ZN5	Adenosine 3'-phospho 5'-phosphosulfate transporter 1 OS=Mus musculus OX=10090 GN=Slc35b2 PE=1 SV=1	[K].ACVFGNEPK.[A]	1xCarbamidomethyl [C2]	0.0178593	0.000646475	1	2	1	1	Q91ZN5 [79-87]	Q91ZN5 1xCarbamidomethyl [C80]	0	1021.48	High	n/a	High		0.0001836		0.00182	2.14
Q91ZN5	Adenosine 3'-phospho 5'-phosphosulfate transporter 1 OS=Mus musculus OX=10090 GN=Slc35b2 PE=1 SV=1	[R].GLCFPLVK.[A]	1xCarbamidomethyl [C3]	0.0130223	0.000480989	1	2	1	5	Q91ZN5 [71-78]	Q91ZN5 1xCarbamidomethyl [C73]	0	933.523	High	n/a	High		0.0001237		0.001291	1.32
P55264	Adenosine kinase OS=Mus musculus OX=10090 GN=Adk PE=1 SV=2	[R].SLVANLAAANCYKKEK.[H]	1xCarbamidomethyl [C11]	0.000145354	3.46687e-05	1	2	1	1	P55264 [149-164]	P55264 1xCarbamidomethyl [C159]	2	1779.94	High	n/a	High		7.935e-06		1.232e-05	1.57
P55264	Adenosine kinase OS=Mus musculus OX=10090 GN=Adk PE=1 SV=2	[R].SLVANLAAANCYKK.[E]	1xCarbamidomethyl [C11]	4.00165e-07	3.46687e-05	1	2	1	3	P55264 [149-162]	P55264 1xCarbamidomethyl [C159]	1	1522.8	High	n/a	High		7.935e-06		2.451e-08	4.35
P55264	Adenosine kinase OS=Mus musculus OX=10090 GN=Adk PE=1 SV=2	[R].SLVANLAAANCYK.[K]	1xCarbamidomethyl [C11]	2.5673e-05	3.46687e-05	1	2	1	4	P55264 [149-161]	P55264 1xCarbamidomethyl [C159]	0	1394.71	High	n/a	High		7.935e-06		1.978e-06	1.89
P55264	Adenosine kinase OS=Mus musculus OX=10090 GN=Adk PE=1 SV=2	[R].TGCTFPEKPDFH.[-]	1xCarbamidomethyl [C3]	1.67542e-05	3.46687e-05	1	2	1	10	P55264 [350-361]	P55264 1xCarbamidomethyl [C352]	0	1435.63	High	n/a	High		7.935e-06		1.258e-06	2.22
P55264	Adenosine kinase OS=Mus musculus OX=10090 GN=Adk PE=1 SV=2	[R].RTGCTFPEKPDFH.[-]	1xCarbamidomethyl [C4]	0.00104502	7.02174e-05	1	2	1	3	P55264 [349-361]	P55264 1xCarbamidomethyl [C352]	1	1591.73	High	n/a	High		1.496e-05		9.704e-05	3.11
P55264	Adenosine kinase OS=Mus musculus OX=10090 GN=Adk PE=1 SV=2	[K].AATFFGCIGIDKFGEILK.[R]	1xCarbamidomethyl [C7]	3.59528e-08	3.46687e-05	1	2	1	2	P55264 [99-116]	P55264 1xCarbamidomethyl [C105]	1	1987.04	High	n/a	High		7.935e-06		1.923e-09	5.35
P55264	Adenosine kinase OS=Mus musculus OX=10090 GN=Adk PE=1 SV=2	[K].AATFFGCIGIDK.[F]	1xCarbamidomethyl [C7]	6.76663e-05	3.46687e-05	1	2	1	4	P55264 [99-110]	P55264 1xCarbamidomethyl [C105]	0	1299.64	High	n/a	High		7.935e-06		5.49e-06	2.94
Q60612	Adenosine receptor A1 OS=Mus musculus OX=10090 GN=Adora1 PE=2 SV=4	[R].CQPKPPIEEDIPEEK.[A]	1xCarbamidomethyl [C1]	2.07162e-08	3.46687e-05	1	1	1	1	Q60612 [309-323]	Q60612 1xCarbamidomethyl [C309]	0	1808.87	High	n/a	High		7.935e-06		1.075e-09	4.15
P50247	Adenosylhomocysteinase OS=Mus musculus OX=10090 GN=Ahcy PE=1 SV=3	[K].GETDEEYLWCIEQTLHFK.[D]	1xCarbamidomethyl [C10]	2.72911e-08	3.46687e-05	1	1	1	2	P50247 [104-121]	P50247 1xCarbamidomethyl [C113]	0	2298.04	High	n/a	High		7.935e-06		1.441e-09	4.25
P50247	Adenosylhomocysteinase OS=Mus musculus OX=10090 GN=Ahcy PE=1 SV=3	[K].EGNIFVTTTGCVDIILGR.[H]	1xCarbamidomethyl [C11]	1.71942e-07	3.46687e-05	1	1	1	9	P50247 [268-285]	P50247 1xCarbamidomethyl [C278]	0	1965.01	High	n/a	High		7.935e-06		1.007e-08	3
P50247	Adenosylhomocysteinase OS=Mus musculus OX=10090 GN=Ahcy PE=1 SV=3	[K].VAVVAGYGDVGKGCAQALR.[G]	1xCarbamidomethyl [C14]	1.89391e-10	3.46687e-05	1	1	1	2	P50247 [215-233]	P50247 1xCarbamidomethyl [C228]	1	1890.99	High	n/a	High		7.935e-06		7.586e-12	4.49
P50247	Adenosylhomocysteinase OS=Mus musculus OX=10090 GN=Ahcy PE=1 SV=3	[K].GCAQALR.[G]	1xCarbamidomethyl [C2]	0.112923	0.00375588	1	1	1	4	P50247 [227-233]	P50247 1xCarbamidomethyl [C228]	0	775.388	High	n/a	High		0.0009493		0.01692	1.72
P50247	Adenosylhomocysteinase OS=Mus musculus OX=10090 GN=Ahcy PE=1 SV=3	[R].VIITEIDPINALQAAMEGYEVTTMDEACK.[E]	1xCarbamidomethyl [C28]	1.2137e-11	3.46687e-05	1	1	1	2	P50247 [239-267]	P50247 1xCarbamidomethyl [C266]	0	3225.54	High	n/a	High		7.935e-06		4.195e-13	7.28
P50247	Adenosylhomocysteinase OS=Mus musculus OX=10090 GN=Ahcy PE=1 SV=3	[R].VIITEIDPINALQAAMEGYEVTTMDEACK.[E]	1xCarbamidomethyl [C28]; 1xOxidation [M]	3.6246e-10	3.46687e-05	1	1	2	2	P50247 [239-267]	P50247 1xCarbamidomethyl [C266]	0	3241.53	High	n/a	High		7.935e-06		1.509e-11	6.36
P50247	Adenosylhomocysteinase OS=Mus musculus OX=10090 GN=Ahcy PE=1 SV=3	[R].VIITEIDPINALQAAMEGYEVTTMDEACK.[E]	1xCarbamidomethyl [C28]; 2xOxidation [M16; M24]	3.46965e-08	3.46687e-05	1	1	1	1	P50247 [239-267]	P50247 1xCarbamidomethyl [C266]	0	3257.53	High	n/a	High		7.935e-06		1.86e-09	2.19
P50247	Adenosylhomocysteinase OS=Mus musculus OX=10090 GN=Ahcy PE=1 SV=3	[R].WSSCNIFSTQDHAAAAIAK.[A]	1xCarbamidomethyl [C4]	4.90784e-08	3.46687e-05	1	1	1	2	P50247 [76-94]	P50247 1xCarbamidomethyl [C79]	0	2077.98	High	n/a	High		7.935e-06		2.671e-09	4.02
P50247	Adenosylhomocysteinase OS=Mus musculus OX=10090 GN=Ahcy PE=1 SV=3	[K].FDNLYGCR.[E]	1xCarbamidomethyl [C7]	0.00488834	0.000259952	1	1	1	2	P50247 [189-196]	P50247 1xCarbamidomethyl [C195]	0	1044.46	High	n/a	High		5.844e-05		0.0004677	1.75
O88444	Adenylate cyclase type 1 OS=Mus musculus OX=10090 GN=Adcy1 PE=1 SV=2	[K].FDELATENHCR.[R]	1xCarbamidomethyl [C10]	1.75094e-06	3.46687e-05	1	1	1	2	O88444 [334-344]	O88444 1xCarbamidomethyl [C343]	0	1391.6	High	n/a	High		7.935e-06		1.166e-07	3.92
O88444	Adenylate cyclase type 1 OS=Mus musculus OX=10090 GN=Adcy1 PE=1 SV=2	[K].AEIPFSNVMTCEDDDK.[R]	1xCarbamidomethyl [C11]	1.78301e-05	3.46687e-05	1	1	1	1	O88444 [519-534]	O88444 1xCarbamidomethyl [C529]	0	1870.78	High	n/a	High		7.935e-06		1.342e-06	2.47
O88444	Adenylate cyclase type 1 OS=Mus musculus OX=10090 GN=Adcy1 PE=1 SV=2	[K].AEIPFSNVMTCEDDDK.[R]	1xCarbamidomethyl [C11]; 1xOxidation [M9]	2.36901e-06	3.46687e-05	1	1	1	2	O88444 [519-534]	O88444 1xCarbamidomethyl [C529]	0	1886.78	High	n/a	High		7.935e-06		1.601e-07	2.39
O88444	Adenylate cyclase type 1 OS=Mus musculus OX=10090 GN=Adcy1 PE=1 SV=2	[R].VLCGVLGLR.[K]	1xCarbamidomethyl [C3]	0.00253779	0.000170803	1	1	1	7	O88444 [403-411]	O88444 1xCarbamidomethyl [C405]	0	986.582	High	n/a	High		3.462e-05		0.0002394	1.55
O88444	Adenylate cyclase type 1 OS=Mus musculus OX=10090 GN=Adcy1 PE=1 SV=2	[R].ACGEEFACPELEALFR.[G]	2xCarbamidomethyl [C2; C8]	1.76523e-08	3.46687e-05	1	1	1	2	O88444 [34-49]	O88444 2xCarbamidomethyl [C35; C41]	0	1898.84	High	n/a	High		7.935e-06		9.073e-10	4.59
O88444	Adenylate cyclase type 1 OS=Mus musculus OX=10090 GN=Adcy1 PE=1 SV=2	[K].TVCYLLVQLMHCR.[K]	2xCarbamidomethyl [C3; C12]	0.000867252	7.02174e-05	1	1	1	1	O88444 [502-514]	O88444 2xCarbamidomethyl [C504; C513]	0	1692.84	High	n/a	High		1.496e-05		8.01e-05	3.02
O88444	Adenylate cyclase type 1 OS=Mus musculus OX=10090 GN=Adcy1 PE=1 SV=2	[K].TVCYLLVQLMHCR.[K]	2xCarbamidomethyl [C3; C12]; 1xOxidation [M10]	1.98378e-05	3.46687e-05	1	1	1	2	O88444 [502-514]	O88444 2xCarbamidomethyl [C504; C513]	0	1708.83	High	n/a	High		7.935e-06		1.508e-06	1.44
O88444	Adenylate cyclase type 1 OS=Mus musculus OX=10090 GN=Adcy1 PE=1 SV=2	[R].VQCFPGCLTIQIR.[T]	2xCarbamidomethyl [C3; C7]	0.000403971	3.46687e-05	1	1	1	1	O88444 [659-671]	O88444 2xCarbamidomethyl [C661; C665]	0	1591.81	High	n/a	High		7.935e-06		3.612e-05	2.3
O88444	Adenylate cyclase type 1 OS=Mus musculus OX=10090 GN=Adcy1 PE=1 SV=2	[K].ILGDCYYCVSGLTQPK.[T]	2xCarbamidomethyl [C5; C8]	5.61024e-07	3.46687e-05	1	1	1	4	O88444 [348-363]	O88444 2xCarbamidomethyl [C352; C355]	0	1873.88	High	n/a	High		7.935e-06		3.498e-08	3.29
Q80TL1	Adenylate cyclase type 2 OS=Mus musculus OX=10090 GN=Adcy2 PE=1 SV=2	[R].VGVHSGNVLCGVIGLQK.[W]	1xCarbamidomethyl [C10]	8.28375e-11	3.46687e-05	1	1	1	13	Q80TL1 [383-399]	Q80TL1 1xCarbamidomethyl [C392]	0	1736.95	High	n/a	High		7.935e-06		3.175e-12	5.33
Q80TL1	Adenylate cyclase type 2 OS=Mus musculus OX=10090 GN=Adcy2 PE=1 SV=2	[R].LASDCSPGELVHMLNELFGK.[F]	1xCarbamidomethyl [C5]	2.68101e-08	3.46687e-05	1	1	1	2	Q80TL1 [301-320]	Q80TL1 1xCarbamidomethyl [C305]	0	2217.07	High	n/a	High		7.935e-06		1.421e-09	5.12
Q80TL1	Adenylate cyclase type 2 OS=Mus musculus OX=10090 GN=Adcy2 PE=1 SV=2	[R].LASDCSPGELVHMLNELFGK.[F]	1xCarbamidomethyl [C5]; 1xOxidation [M13]	1.15285e-06	3.46687e-05	1	1	1	2	Q80TL1 [301-320]	Q80TL1 1xCarbamidomethyl [C305]	0	2233.06	High	n/a	High		7.935e-06		7.485e-08	4.43
Q80TL1	Adenylate cyclase type 2 OS=Mus musculus OX=10090 GN=Adcy2 PE=1 SV=2	[K].MGLDMCEAIK.[K]	1xCarbamidomethyl [C6]; 2xOxidation [M1; M5]	0.000379608	3.46687e-05	1	1	1	1	Q80TL1 [360-369]	Q80TL1 1xCarbamidomethyl [C365]	0	1199.51	High	n/a	High		7.935e-06		3.382e-05	1.21
Q80TL1	Adenylate cyclase type 2 OS=Mus musculus OX=10090 GN=Adcy2 PE=1 SV=2	[K].IQVTEETSLILQTLGYTCTCR.[G]	2xCarbamidomethyl [C18; C20]	4.45393e-06	3.46687e-05	1	1	1	6	Q80TL1 [1039-1059]	Q80TL1 2xCarbamidomethyl [C1056; C1058]	0	2486.23	High	n/a	High		7.935e-06		3.128e-07	3.32
Q80TL1	Adenylate cyclase type 2 OS=Mus musculus OX=10090 GN=Adcy2 PE=1 SV=2	[R].DTCNCIK.[S]	2xCarbamidomethyl [C3; C5]	0.0446658	0.00132338	1	1	1	1	Q80TL1 [221-227]	Q80TL1 2xCarbamidomethyl [C223; C225]	0	910.376	High	n/a	High		0.0003719		0.005083	0.86
Q80TL1	Adenylate cyclase type 2 OS=Mus musculus OX=10090 GN=Adcy2 PE=1 SV=2	[K].ILGDCYYCVSGLPISLPNHAK.[N]	2xCarbamidomethyl [C5; C8]	3.23265e-07	3.46687e-05	1	1	1	4	Q80TL1 [335-355]	Q80TL1 2xCarbamidomethyl [C339; C342]	0	2377.17	High	n/a	High		7.935e-06		1.951e-08	3.36
Q80TL1	Adenylate cyclase type 2 OS=Mus musculus OX=10090 GN=Adcy2 PE=1 SV=2	[R].IKILGDCYYCVSGLPISLPNHAK.[N]	2xCarbamidomethyl [C7; C10]	7.59062e-07	3.46687e-05	1	1	1	1	Q80TL1 [333-355]	Q80TL1 2xCarbamidomethyl [C339; C342]	1	2618.35	High	n/a	High		7.935e-06		4.8e-08	2.86
Q80TL1; P51829	Adenylate cyclase type 2 OS=Mus musculus OX=10090 GN=Adcy2 PE=1 SV=2 Adenylate cyclase type 7 OS=Mus musculus OX=10090 GN=Adcy7 PE=1 SV=2	[K].EGLECLR.[L]	1xCarbamidomethyl [C5]	0.0248785	0.000861342	2	2	1	2	Q80TL1 [907-913]; P51829 [919-925]	Q80TL1 1xCarbamidomethyl [C911]; P51829 1xCarbamidomethyl [C923]	0	876.424	High	n/a	High		0.0002509		0.0026	1.94
Q8VHH7	Adenylate cyclase type 3 OS=Mus musculus OX=10090 GN=Adcy3 PE=1 SV=2	[R].VHISQSTMDCLK.[G]	1xCarbamidomethyl [C10]	1.51931e-05	3.46687e-05	1	1	1	1	Q8VHH7 [454-465]	Q8VHH7 1xCarbamidomethyl [C463]	0	1418.68	High	n/a	High		7.935e-06		1.143e-06	3.96
Q8VHH7	Adenylate cyclase type 3 OS=Mus musculus OX=10090 GN=Adcy3 PE=1 SV=2	[R].NSGSCLCLPR.[F]	2xCarbamidomethyl [C5; C7]	0.000157461	3.46687e-05	1	1	1	3	Q8VHH7 [42-51]	Q8VHH7 2xCarbamidomethyl [C46; C48]	0	1163.53	High	n/a	High		7.935e-06		1.345e-05	2.27
Q8VHH7	Adenylate cyclase type 3 OS=Mus musculus OX=10090 GN=Adcy3 PE=1 SV=2	[R].NSGSCLCLPRFMR.[L]	2xCarbamidomethyl [C5; C7]	0.000772692	7.02174e-05	1	1	1	1	Q8VHH7 [42-54]	Q8VHH7 2xCarbamidomethyl [C46; C48]	1	1597.74	High	n/a	High		1.496e-05		7.056e-05	2.07
Q8VHH7	Adenylate cyclase type 3 OS=Mus musculus OX=10090 GN=Adcy3 PE=1 SV=2	[K].ILGDCYYCICGLPDYR.[E]	3xCarbamidomethyl [C5; C8; C10]	1.03578e-07	3.46687e-05	1	1	1	1	Q8VHH7 [365-380]	Q8VHH7 3xCarbamidomethyl [C369; C372; C374]	0	2037.89	High	n/a	High		7.935e-06		5.871e-09	3.77
P84309	Adenylate cyclase type 5 OS=Mus musculus OX=10090 GN=Adcy5 PE=1 SV=2	[K].EHSIETFLILSCTQKR.[K]	1xCarbamidomethyl [C12]	2.4106e-07	3.46687e-05	1	2	1	3	P84309 [635-650]	P84309 1xCarbamidomethyl [C646]	1	1962.01	High	n/a	High		7.935e-06		1.433e-08	6.05
P84309	Adenylate cyclase type 5 OS=Mus musculus OX=10090 GN=Adcy5 PE=1 SV=2	[K].EHSIETFLILSCTQK.[R]	1xCarbamidomethyl [C12]	1.40141e-07	3.46687e-05	1	2	1	12	P84309 [635-649]	P84309 1xCarbamidomethyl [C646]	0	1805.91	High	n/a	High		7.935e-06		8.091e-09	4.22
P84309	Adenylate cyclase type 5 OS=Mus musculus OX=10090 GN=Adcy5 PE=1 SV=2	[R].QAFQETRECIQAR.[L]	1xCarbamidomethyl [C9]	6.88594e-06	3.46687e-05	1	2	1	2	P84309 [407-419]	P84309 1xCarbamidomethyl [C415]	1	1636.79	High	n/a	High		7.935e-06		4.92e-07	3.5
P84309	Adenylate cyclase type 5 OS=Mus musculus OX=10090 GN=Adcy5 PE=1 SV=2	[R].ADHAHCCVEMGMDMIEAISLVR.[E]	2xCarbamidomethyl [C6; C7]	1.0737e-06	3.46687e-05	1	2	1	1	P84309 [532-553]	P84309 2xCarbamidomethyl [C537; C538]	0	2545.11	High	n/a	High		7.935e-06		6.93e-08	2.21
Q01341	Adenylate cyclase type 6 OS=Mus musculus OX=10090 GN=Adcy6 PE=1 SV=1	[R].SGPSCWHR.[L]	1xCarbamidomethyl [C5]	0.0123529	0.000454522	1	1	1	2	Q01341 [112-119]	Q01341 1xCarbamidomethyl [C116]	0	986.426	High	n/a	High		0.0001129		0.001225	2.03
Q01341	Adenylate cyclase type 6 OS=Mus musculus OX=10090 GN=Adcy6 PE=1 SV=1	[R].ASGFCAPR.[Y]	1xCarbamidomethyl [C5]	0.0230051	0.000779279	1	1	1	1	Q01341 [34-41]	Q01341 1xCarbamidomethyl [C38]	0	865.399	High	n/a	High		0.0002247		0.0024	1.99
Q01341	Adenylate cyclase type 6 OS=Mus musculus OX=10090 GN=Adcy6 PE=1 SV=1	[K].GYQLECR.[G]	1xCarbamidomethyl [C6]	0.0533504	0.00152429	1	1	1	1	Q01341 [1137-1143]	Q01341 1xCarbamidomethyl [C1142]	0	925.42	High	n/a	High		0.0004295		0.006296	1.7
Q01341; P84309	Adenylate cyclase type 6 OS=Mus musculus OX=10090 GN=Adcy6 PE=1 SV=1 Adenylate cyclase type 5 OS=Mus musculus OX=10090 GN=Adcy5 PE=1 SV=2	[R].VGIHSGRVHCGVLGLR.[K]	1xCarbamidomethyl [C10]	3.50453e-05	3.46687e-05	2	3	1	2	Q01341 [471-486]; P84309 [564-579]	Q01341 1xCarbamidomethyl [C480]; P84309 1xCarbamidomethyl [C573]	1	1716.94	High	n/a	High		7.935e-06		2.744e-06	0.83
Q01341; P84309	Adenylate cyclase type 6 OS=Mus musculus OX=10090 GN=Adcy6 PE=1 SV=1 Adenylate cyclase type 5 OS=Mus musculus OX=10090 GN=Adcy5 PE=1 SV=2	[R].VHCGVLGLR.[K]	1xCarbamidomethyl [C3]	0.000275666	3.46687e-05	2	3	1	12	Q01341 [478-486]; P84309 [571-579]	Q01341 1xCarbamidomethyl [C480]; P84309 1xCarbamidomethyl [C573]	0	1010.56	High	n/a	High		7.935e-06		2.413e-05	0.55
Q01341; P84309	Adenylate cyclase type 6 OS=Mus musculus OX=10090 GN=Adcy6 PE=1 SV=1 Adenylate cyclase type 5 OS=Mus musculus OX=10090 GN=Adcy5 PE=1 SV=2	[K].LAAENHCLRIK.[I]	1xCarbamidomethyl [C7]	6.35636e-06	3.46687e-05	2	3	1	2	Q01341 [412-422]; P84309 [505-515]	Q01341 1xCarbamidomethyl [C418]; P84309 1xCarbamidomethyl [C511]	1	1324.72	High	n/a	High		7.935e-06		4.544e-07	2.01
Q01341; P84309	Adenylate cyclase type 6 OS=Mus musculus OX=10090 GN=Adcy6 PE=1 SV=1 Adenylate cyclase type 5 OS=Mus musculus OX=10090 GN=Adcy5 PE=1 SV=2	[K].LAAENHCLR.[I]	1xCarbamidomethyl [C7]	2.45567e-05	3.46687e-05	2	3	1	17	Q01341 [412-420]; P84309 [505-513]	Q01341 1xCarbamidomethyl [C418]; P84309 1xCarbamidomethyl [C511]	0	1083.54	High	n/a	High		7.935e-06		1.89e-06	2.42
Q01341; P84309	Adenylate cyclase type 6 OS=Mus musculus OX=10090 GN=Adcy6 PE=1 SV=1 Adenylate cyclase type 5 OS=Mus musculus OX=10090 GN=Adcy5 PE=1 SV=2	[K].ILGDCYYCVSGLPEAR.[A]	2xCarbamidomethyl [C5; C8]	6.8807e-08	3.46687e-05	2	3	1	2	Q01341 [423-438]; P84309 [516-531]	Q01341 2xCarbamidomethyl [C427; C430]; P84309 2xCarbamidomethyl [C520; C523]	0	1872.86	High	n/a	High		7.935e-06		3.826e-09	4.51
Q01341; P84309	Adenylate cyclase type 6 OS=Mus musculus OX=10090 GN=Adcy6 PE=1 SV=1 Adenylate cyclase type 5 OS=Mus musculus OX=10090 GN=Adcy5 PE=1 SV=2	[R].IKILGDCYYCVSGLPEAR.[A]	2xCarbamidomethyl [C7; C10]	3.46832e-09	3.46687e-05	2	3	1	2	Q01341 [421-438]; P84309 [514-531]	Q01341 2xCarbamidomethyl [C427; C430]; P84309 2xCarbamidomethyl [C520; C523]	1	2114.04	High	n/a	High		7.935e-06		1.64e-10	3.62
P51829	Adenylate cyclase type 7 OS=Mus musculus OX=10090 GN=Adcy7 PE=1 SV=2	[R].VGIHSGNVLCGVIGLR.[K]	1xCarbamidomethyl [C10]	0.0565814	0.00162838	1	1	1	1	P51829 [375-390]	P51829 1xCarbamidomethyl [C384]	0	1650.91	High	n/a	High		0.0004489		0.006782	2.79
P97490	Adenylate cyclase type 8 OS=Mus musculus OX=10090 GN=Adcy8 PE=1 SV=2	[R].IGIHSGSVLCGVLGLR.[K]	1xCarbamidomethyl [C10]	3.41228e-05	3.46687e-05	1	1	1	3	P97490 [506-521]	P97490 1xCarbamidomethyl [C515]	0	1637.92	High	n/a	High		7.935e-06		2.676e-06	4.09
P97490	Adenylate cyclase type 8 OS=Mus musculus OX=10090 GN=Adcy8 PE=1 SV=2	[R].LAHEHHCLR.[I]	1xCarbamidomethyl [C7]	0.000283115	3.46687e-05	1	1	1	4	P97490 [447-455]	P97490 1xCarbamidomethyl [C453]	0	1172.57	High	n/a	High		7.935e-06		2.489e-05	2.84
P97490	Adenylate cyclase type 8 OS=Mus musculus OX=10090 GN=Adcy8 PE=1 SV=2	[K].QPEESLLCLPEDIVK.[E]	1xCarbamidomethyl [C8]	1.68976e-06	3.46687e-05	1	1	1	1	P97490 [587-601]	P97490 1xCarbamidomethyl [C594]	0	1769.9	High	n/a	High		7.935e-06		1.122e-07	3.14
P97490	Adenylate cyclase type 8 OS=Mus musculus OX=10090 GN=Adcy8 PE=1 SV=2	[R].QAFLETRRCVEAR.[L]	1xCarbamidomethyl [C9]	0.000103684	3.46687e-05	1	1	1	1	P97490 [346-358]	P97490 1xCarbamidomethyl [C354]	2	1635.84	High	n/a	High		7.935e-06		8.661e-06	4.53
P51830	Adenylate cyclase type 9 OS=Mus musculus OX=10090 GN=Adcy9 PE=1 SV=1	[R].CFPQTQR.[R]	1xCarbamidomethyl [C1]	0.187821	0.00659813	1	1	1	1	P51830 [108-114]	P51830 1xCarbamidomethyl [C108]	0	936.436	High	n/a	High		0.001649		0.03561	1.1
P51830	Adenylate cyclase type 9 OS=Mus musculus OX=10090 GN=Adcy9 PE=1 SV=1	[R].VGVHTGTVLCGILGMR.[R]	1xCarbamidomethyl [C10]	7.80104e-05	3.46687e-05	1	1	1	2	P51830 [488-503]	P51830 1xCarbamidomethyl [C497]	0	1669.89	High	n/a	High		7.935e-06		6.385e-06	3.81
P51830	Adenylate cyclase type 9 OS=Mus musculus OX=10090 GN=Adcy9 PE=1 SV=1	[K].FDSMNLEEACLER.[C]	1xCarbamidomethyl [C10]	1.30568e-06	3.46687e-05	1	1	1	3	P51830 [95-107]	P51830 1xCarbamidomethyl [C104]	0	1613.69	High	n/a	High		7.935e-06		8.552e-08	4.21
P51830	Adenylate cyclase type 9 OS=Mus musculus OX=10090 GN=Adcy9 PE=1 SV=1	[R].VGVHTGTVLCGILGMR.[R]	1xCarbamidomethyl [C10]; 1xOxidation [M15]	1.08204e-09	3.46687e-05	1	1	1	11	P51830 [488-503]	P51830 1xCarbamidomethyl [C497]	0	1685.88	High	n/a	High		7.935e-06		4.787e-11	3.25
P51830	Adenylate cyclase type 9 OS=Mus musculus OX=10090 GN=Adcy9 PE=1 SV=1	[K].FDSMNLEEACLER.[C]	1xCarbamidomethyl [C10]; 1xOxidation [M4]	5.76409e-06	3.46687e-05	1	1	1	1	P51830 [95-107]	P51830 1xCarbamidomethyl [C104]	0	1629.69	High	n/a	High		7.935e-06		4.098e-07	3.63
P51830	Adenylate cyclase type 9 OS=Mus musculus OX=10090 GN=Adcy9 PE=1 SV=1	[-].MASSPHQQLLHHHSTEVSCDSSGDSNSVR.[V]	1xCarbamidomethyl [C19]; 1xMet-loss+Acetyl [N-Term]	1.75158e-05	3.46687e-05	1	1	1	2	P51830 [1-29]	P51830 1xCarbamidomethyl [C19]; 1xMet-loss+Acetyl [N-Term]	0	3101.37	High	n/a	High		0.0002131		0.0001293	7.59
P51830	Adenylate cyclase type 9 OS=Mus musculus OX=10090 GN=Adcy9 PE=1 SV=1	[R].NPCNSSVLQDGR.[R]	1xCarbamidomethyl [C3]	2.22686e-05	3.46687e-05	1	1	1	1	P51830 [961-972]	P51830 1xCarbamidomethyl [C963]	0	1346.61	High	n/a	High		7.935e-06		1.705e-06	2.68
P51830	Adenylate cyclase type 9 OS=Mus musculus OX=10090 GN=Adcy9 PE=1 SV=1	[K].AIEQFCQEKK.[E]	1xCarbamidomethyl [C6]	0.000613352	3.46687e-05	1	1	1	2	P51830 [472-481]	P51830 1xCarbamidomethyl [C477]	1	1280.63	High	n/a	High		7.935e-06		5.584e-05	2.75
P51830	Adenylate cyclase type 9 OS=Mus musculus OX=10090 GN=Adcy9 PE=1 SV=1	[K].AIEQFCQEK.[K]	1xCarbamidomethyl [C6]	0.00232246	0.000136771	1	1	1	5	P51830 [472-480]	P51830 1xCarbamidomethyl [C477]	0	1152.54	High	n/a	High		2.796e-05		0.0002195	1.61
[truncated: 25,656 more rows]

## Sheet: Table S2
Master Protein Accessions	Master Protein Descriptions	Annotated Sequence	Modifications	Qvality PEP	Qvality q-value	# Protein Groups	# Proteins	# Isoforms	# PSMs	Positions in Master Proteins	Modifications in Master Proteins	# Missed Cleavages	Theo. MH+ [Da]	Found in Sample: [S2] F2: Sample	Confidence (by Search Engine): Mascot	Confidence (by Search Engine): Sequest HT	Percolator q-Value (by Search Engine): Mascot	Percolator q-Value (by Search Engine): Sequest HT	Percolator PEP (by Search Engine): Mascot	Percolator PEP (by Search Engine): Sequest HT	XCorr (by Search Engine): Sequest HT	Ions Score (by Search Engine): Mascot
[truncated: 25,269 more rows]

[truncated: 3 more sheets: Table S3, Table S4, Table S5]
